# Supplementary material
Source: PubMed Central journal article supplement (PMC3401058)
Supplement: supp_blood-2009-01-202028_TableS1.pdf [file supp_blood-2009-01-202028_TableS1.pdf]

| Tumor ID | Site              | Diagnosis | Age | Sex    | IHC*, as in Hans et al. | BCL-2 IHC/PCR    | CD3** | CD68*** |
|----------|-------------------|-----------|-----|--------|-------------------------|------------------|-------|---------|
| 517      | Lymph Node        | DLBCL     | 61  | Male   | Non-GCB                 | Pos t(14;18) neg | 1+    | 2+      |
| 559      | Small Bowel       | DLBCL     | 55  | Male   | Non-GCB                 | Neg              | 3+    | 2+      |
| 642      | Stomach           | DLBCL     | 61  | Female | GCB                     | Neg t(14;18) neg | 2+    | 2+      |
| 865      | Distal Ileum      | DLBCL     | 35  | Female | Non-GCB                 | Pos              | 1+    | 2+      |
| 1057     | Stomach           | DLBCL     | 73  | Male   | Non-GCB                 | Pos              | 3+    | 3+      |
| 1143     | Large Bowel       | DLBCL     | 46  | Male   | GCB                     | Pos              | 2+    | 3+      |
| 1309     | Lymph Node        | DLBCL     | 76  | Male   | Non-GCB                 | Pos t(14;18) neg | 2+    | 2+      |
| 1320     | Lymph Node        | DLBCL     | 55  | Male   | Non-GCB                 | Pos t(14;18) neg | 1+    | 1+      |
| 1326     | Lymph Node        | DLBCL     | 48  | Female | Non-GCB                 | Pos t(14;18) neg | 2+    | 3+      |
| 1423     | Lymph Node        | DLBCL     | 53  | Male   | Non-GCB                 | Pos t(14;18) neg | 3+    | 3+      |
| 1650     | Lymph Node        | DLBCL     | 53  | Male   | GCB                     | Pos t(14;18) neg | 1+    | 3+      |
| 1750     | Spleen            | DLBCL     | 75  | Male   | Non-GCB                 | Pos t(14;18) neg | 2+    | 2+      |
| 2202     | Lymph Node        | DLBCL     | 48  | Male   | Non-GCB                 | Pos t(14;18) neg | 1+    | 2+      |
| 2216     | Lymph Node        | DLBCL     | 32  | Male   | GCB                     | Neg t(14;18) neg | 1+    | 3+      |
| 2323     | Testicle          | DLBCL     | 57  | Male   | GCB                     | Pos              | 2+    | 3+      |
| 2485     | Gastroesophageal  | DLBCL     | 78  | Female | GCB                     | Pos              | 2+    | 2+      |
| 2633     | Submandibular     | DLBCL     | 81  | Male   | Non-GCB                 | Pos              | 2+    | 2+      |
| 3002     | Lung              | DLBCL     | 74  | Female | GCB                     | Pos              | 2+    | 3+      |
| 3122     | Lymph Node        | DLBCL     | 32  | Male   | GCB                     | Pos              | 1+    | 2+      |
| 3271     | Lymph Node        | DLBCL     | 70  | Female | GCB                     | Pos t(14;18) neg | 1+    | 1+      |
| 3279     | Soft Tissue, Back | DLBCL     | 59  | Male   | Non-GCB                 | Pos              | 1+    | 2+      |
| 3409     | Thyroid           | DLBCL     | 76  | Female | GCB                     | Neg              | 2+    | 3+      |
| 3416     | Lymph Node        | DLBCL     | 75  | Male   | Non-GCB                 | Pos t(14;18) neg | 2+    | 1+      |
| 3466     | Lymph Node        | DLBCL     | 50  | Male   | GCB                     | Pos t(14;18) neg | 3+    | 3+      |
| 3522     | Small Bowel       | DLBCL     | 49  | Female | GCB                     | Neg              | 1+    | 2+      |
| 3533     | Lymph Node        | DLBCL     | 58  | Male   | Non-GCB                 | Pos t(14;18) neg | 3+    | 3+      |
| 3717     | Lymph Node        | DLBCL     | 70  | Female | Non-GCB                 | Pos t(14;18) neg | 1+    | 1+      |
| 3832     | Lymph Node        | DLBCL     | 62  | Male   | Non-GCB                 | Neg t(14;18) neg | 2+    | 3+      |
| 4021     | Kidney            | DLBCL     | 50  | Female | GCB                     | Neg t(14;18) neg | 1+    | 1+      |
| 4221     | Lymph Node        | DLBCL     | 74  | Male   | Non-GCB                 | Pos t(14;18) neg | 1+    | 2+      |
| 4236     | Axillary Mass     | DLBCL     | 65  | Male   | GCB                     | Pos t(14;18) neg | 1+    | 2+      |
| 4350     | Lymph Node        | DLBCL     | 65  | Female | Non-GCB                 | Pos t(14;18) neg | 1+    | 3+      |
| 4450     | Lymph Node        | DLBCL     | 62  | Male   | GCB                     | Neg t(14;18) neg | 1+    | 2+      |

|      |               |       |    |        |         |                  |    |    |
|------|---------------|-------|----|--------|---------|------------------|----|----|
| 4470 | Lymph Node    | DLBCL | 66 | Male   | Non-GCB | Pos t(14;18) pos | 3+ | 3+ |
| 4494 | Lymph Node    | DLBCL | 22 | Male   | Non-GCB | Pos t(14;18) neg | 3+ | 3+ |
| 4522 | Lymph Node    | DLBCL | 25 | Male   | GCB     | Neg t(14;18) neg | 1+ | 3+ |
| 4554 | Lymph Node    | DLBCL | 74 | Female | Non-GCB | Pos              | 2+ | 2+ |
| 4756 | Testis        | DLBCL | 62 | Male   | GCB     | Pos              | 3+ | 3+ |
| 5028 | Stomach       | DLBCL | 72 | Female | GCB     | Pos              | 1+ | 3+ |
| 5043 | Lymph Node    | DLBCL | 79 | Male   | Non-GCB | Pos              | 1+ | 3+ |
| 5081 | Stomach       | DLBCL | 51 | Male   | GCB     | Neg t(14;18) neg | 1+ | 2+ |
| 5186 | Colon         | DLBCL | 39 | Female | GCB     | Pos t(14;18) neg | 3+ | 2+ |
| 5204 | Stomach       | DLBCL | 51 | Male   | GCB     | Pos t(14;18) neg | 1+ | 2+ |
| 5485 | Neck Mass     | DLBCL | 94 | Male   | GCB     | Neg              | 2+ | 1+ |
| 5536 | Lymph Node    | DLBCL | 75 | Male   | GCB     | Neg t(14;18) neg | 2+ | 2+ |
| 5782 | Lymph Node    | DLBCL | 52 | Female | GCB     | Neg t(14;18) pos | 3+ | 3+ |
| 5935 | Lymph Node    | DLBCL | 40 | Male   | GCB     | Pos              | 2+ | 1+ |
| 6290 | Lymph Node    | DLBCL | 47 | Male   | GCB     | Pos t(14;18) neg | 2+ | 1+ |
| 6614 | Lymph Node    | DLBCL | 66 | Female | Non-GCB | Pos              | 3+ | 2+ |
| 6697 | Lymph Node    | DLBCL | 54 | Male   | GCB     | Pos              | 1+ | 1+ |
| 6902 | Lymph Node    | DLBCL | 75 | Male   | Non-GCB | Pos t(14;18) neg | 3+ | 3+ |
| 7041 | Lymph Node    | DLBCL | 64 | Male   | Non-GCB | Pos              | 3+ | 3+ |
| 7089 | Lymph Node    | DLBCL | 61 | Male   | GCB     | Pos t(14;18) neg | 1+ | 2+ |
| 7119 | Lymph Node    | DLBCL | 70 | Male   | GCB     | Pos t(14;18) neg | 1+ | 2+ |
| 7295 | Lymph Node    | DLBCL | 51 | Male   | Non-GCB | Pos              | 2+ | 3+ |
| 7518 | Lymph Node    | DLBCL | 60 | Female | GCB     | Pos t(14;18) pos | 1+ | 2+ |
| 7572 | Lymph Node    | DLBCL | 78 | Male   | GCB     | Neg t(14;18) neg | 1+ | 2+ |
| 7924 | Lymph Node    | DLBCL | 52 | Male   | Non-GCB | Pos t(14;18) neg | 3+ | 3+ |
| 7970 | Left Shoulder | DLBCL | 52 | Male   | GCB     | Pos              | 3+ | 2+ |

\* Immunohistochemical classification of DLBCL in GCB and Non-GCB as defined in Hans et al, Blood 2004 103:275

**Germinal Center B-Cell (GCB)** = Expression of at least one germinal center marker (CD10, BCL-6), no expression of MUM-1

**Non-GC** = no expression of germinal center markers (CD10, BCL6) or BCL6 + and MUM1 +

**\*\*CD3**

- 1+ Rare; Diffusely Scattered (<5% T-cells)
- 2+ Small Aggregates; Focally Abundant (5-15% T-cells)
- 3+ Large Aggregates; Diffusely Abundant (16-25% T-cells)

**\*\*\*CD68**

- 1+ Rare; Diffusely Scattered (<1% macrophages)

- 2+ Small Aggregates; Focally Abundant (1-5% macrophages)
- 3+ Large Aggregates; Diffusely Abundant (6-10% macrophages)

| Cell lines | Site                | Diagnosis |
|------------|---------------------|-----------|
| OCI-Ly1    | Bone Marrow         | DLBCL     |
| OCI-Ly3    | Bone Marrow + Peri  | DLBCL     |
| OCI-Ly4    | Lymph Node          | DLBCL     |
| OCI-Ly7    | Bone Marrow + Peri  | DLBCL     |
| OCI-Ly8    | Lymph Node          | DLBCL     |
| OCI-Ly18   | Pleural Effusion    | DLBCL     |
| OCI-Ly19   | Bone Marrow         | DLBCL     |
| SU-DHL-4   | Peritoneal Effusion | DLBCL     |
| SU-DHL-5   | Lymph Node          | DLBCL     |
| SU-DHL-6   | Peritoneal Effusion | DLBCL     |
| SU-DHL-7   | Pleural Effusion    | DLBCL     |
| SU-DHL-8   | Pleural Effusion    | DLBCL     |
| SU-DHL-9   | Pleural Effusion    | DLBCL     |
| SU-DHL-10  | Pleural Effusion    | DLBCL     |
| SU-DHL-16  | Pleural Effusion    | DLBCL     |
| NU-DHL-1   | Lymph Node          | DLBCL     |
| NU-DUL-1   | Cerebrospinal Fluid | DLBCL     |
| USC-DHL-1  | NA                  | DLBCL     |
| WSU-NHL    | Pleural Effusion    | DLBCL     |
| HT         | Peritoneal Effusion | DLBCL     |
| Toledo     | Peripheral Blood    | DLBCL     |
| RC-K8      | Peritoneal Effusion | DLBCL     |
| Pfeiffer   | Pleural effusion    | DLBCL     |
| FL-318     | Ascites             | DLBCL     |
| Farage     | Lymph node          | DLBCL     |
| Karpas 422 | Pleural Effusion    | DLBCL     |
| Karpas-110 | Pleural effusion    | MLBCL     |
