# Supplementary material
Source: PubMed Central journal article supplement (PMC3401058)
Supplement: supp_blood-2009-01-202028_TableS2.pdf [file supp_blood-2009-01-202028_TableS2.pdf]

Gain: copy >=2.5

Loss: copy <=1.5

Gain percent signifiacne threshold =19.1781

Loss percent signifiacne threshold =10.9589

Start and End = genomic coordinates, NCBI build 35

Length = size of coverage surrounding the precursor miRNA sequence

| Region                       | Chr | Start     | End       | Length(kb) | Number of Probes | Gain_Percent | Gain_Sig* | Loss_Percent | Loss_Sig* |
|------------------------------|-----|-----------|-----------|------------|------------------|--------------|-----------|--------------|-----------|
| chr1, mir-200b, mir-200c     | 1   | 1125407   | 1161390   | 35         | 43               | 0            |           | 2.7          |           |
| chr1, mir-551a               | 1   | 3483416   | 3517511   | 34         | 31               | 1.4          |           | 2.7          |           |
| chr1, mir-34a                | 1   | 9128993   | 9163102   | 34         | 75               | 2.7          |           | 5.5          |           |
| chr1, mir-801                | 1   | 28778727  | 28812822  | 34         | 42               | 0            |           | 2.7          |           |
| chr1, mir-552                | 1   | 34787293  | 34821388  | 34         | 77               | 0            |           | 1.4          |           |
| chr1, AGO4, AGO1, AGO2       | 1   | 35925921  | 36208156  | 282        | 818              | 0            |           | 1.4          |           |
| chr1, mir-30e, mir-30c-1     | 1   | 40872120  | 40909137  | 37         | 136              | 0            |           | 1.4          |           |
| chr1, mir-101-1              | 1   | 65219138  | 65253212  | 34         | 126              | 0            |           | 1.4          |           |
| chr1, SERBP1                 | 1   | 67568514  | 67625144  | 56         | 184              | 1.4          |           | 2.7          |           |
| chr1, mir-186                | 1   | 71228335  | 71262420  | 34         | 149              | 0            |           | 4.1          |           |
| chr1, mir-137                | 1   | 98206647  | 98240748  | 34         | 176              | 0            |           | 2.7          |           |
| chr1, mir-553                | 1   | 100441818 | 100475885 | 34         | 125              | 0            |           | 4.1          |           |
| chr1, mir-197                | 1   | 109836557 | 109870631 | 34         | 141              | 0            |           | 5.5          |           |
| chr1, DDX20                  | 1   | 111993296 | 112039241 | 45         | 185              | 0            |           | 5.5          |           |
| chr1, mir-554                | 1   | 148314345 | 148348440 | 34         | 84               | 13.7         |           | 0            |           |
| chr1, mir-92b                | 1   | 151961041 | 151995136 | 34         | 108              | 8.2          |           | 0            |           |
| chr1, mir-555                | 1   | 152112214 | 152146309 | 34         | 112              | 11           |           | 1.4          |           |
| chr1, mir-9-1                | 1   | 153186206 | 153220294 | 34         | 127              | 11           |           | 0            |           |
| chr1, mir-765                | 1   | 153701996 | 153736109 | 34         | 111              | 11           |           | 0            |           |
| chr1, mir-556                | 1   | 159026994 | 159061088 | 34         | 137              | 13.7         |           | 1.4          |           |
| chr1, mir-557                | 1   | 165059420 | 165093517 | 34         | 127              | 16.4         |           | 1.4          |           |
| chr1, mir-214, mir-199a-1    | 1   | 168822595 | 168862441 | 39         | 195              | 15.1         |           | 1.4          |           |
| chr1, mir-488                | 1   | 173713156 | 173747238 | 34         | 141              | 15.1         |           | 1.4          |           |
| chr1, mir-181b-1, mir-181b-2 | 1   | 195542659 | 195576939 | 34         | 148              | 12.3         |           | 4.1          |           |
| chr1, mir-135b               | 1   | 202132087 | 202166183 | 34         | 98               | 12.3         |           | 0            |           |
| chr1, mir-29c, mir-29b-2     | 1   | 204346592 | 204381263 | 34         | 160              | 12.3         |           | 0            |           |

|                          |   |           |           |    |     |        |        |
|--------------------------|---|-----------|-----------|----|-----|--------|--------|
| chr1, mir-205            | 1 | 205976873 | 206010982 | 34 | 109 | 11     | 0      |
| chr1, mir-215, mir-194-1 | 1 | 216662590 | 216696978 | 34 | 122 | 11     | 2.7    |
| chr2, mir-558            | 2 | 32651871  | 32685964  | 34 | 110 | 11     | 4.1    |
| chr2, mir-559            | 2 | 47499465  | 47533560  | 34 | 94  | 9.6    | 5.5    |
| chr2, mir-217, mir-216   | 2 | 56104753  | 56144845  | 40 | 134 | 11     | 2.7    |
| chr2, mir-560            | 2 | 132832233 | 132866327 | 34 | 9   | 1.4    | 0      |
| chr2, mir-128a           | 2 | 136239699 | 136273780 | 34 | 133 | 1.4    | 2.7    |
| chr2, mir-10b            | 2 | 176823538 | 176857647 | 34 | 119 | 4.1    | 1.4    |
| chr2, mir-561            | 2 | 188970725 | 189004821 | 34 | 139 | 4.1    | 2.7    |
| chr2, mir-26b            | 2 | 219075874 | 219109950 | 34 | 59  | 2.7    | 1.4    |
| chr2, mir-375            | 2 | 219674872 | 219708935 | 34 | 93  | 4.1    | 1.4    |
| chr2, mir-153-1          | 2 | 219967338 | 220001427 | 34 | 78  | 4.1    | 1.4    |
| chr2, mir-562            | 2 | 232845868 | 232879962 | 34 | 60  | 2.7    | 2.7    |
| chr2, mir-149            | 2 | 241098408 | 241132496 | 34 | 40  | 1.4    | 0      |
| chr3, mir-563            | 3 | 15873282  | 15907360  | 34 | 63  | 4.1    | 0      |
| chr3, mir-128b           | 3 | 35743972  | 35778055  | 34 | 164 | 4.1    | 1.4    |
| chr3, mir-26a-1          | 3 | 37968899  | 38002975  | 34 | 124 | 4.1    | 0      |
| chr3, mir-138-1          | 3 | 44113708  | 44147806  | 34 | 126 | 4.1    | 1.4    |
| chr3, mir-564            | 3 | 44861384  | 44895477  | 34 | 92  | 4.1    | 0      |
| chr3, mir-565            | 3 | 45688468  | 45722564  | 34 | 124 | 4.1    | 1.4    |
| chr3, mir-425, mir-191   | 3 | 49015585  | 49050146  | 34 | 99  | 0      | 2.7    |
| chr3, mir-566            | 3 | 50168763  | 50202856  | 34 | 59  | 0      | 1.4    |
| chr3, let-7g, mir-135a-1 | 3 | 52260334  | 52320364  | 60 | 181 | 0      | 1.4    |
| chr3, mir-567            | 3 | 113297338 | 113331435 | 34 | 137 | 1.4    | 6.8    |
| chr3, mir-568            | 3 | 115501012 | 115535106 | 34 | 157 | 0      | 2.7    |
| chr3, mir-198            | 3 | 121580205 | 121614266 | 34 | 125 | 0      | 1.4    |
| chr3, mir-15b, mir-16-2  | 3 | 161588078 | 161622315 | 34 | 154 | 5.5    | 6.8    |
| chr3, mir-551b           | 3 | 169735344 | 169769439 | 34 | 103 | 6.8    | 0      |
| chr3, mir-569            | 3 | 172290155 | 172324250 | 34 | 135 | 5.5    | 0      |
| chr3, mir-28             | 3 | 189872271 | 189906356 | 34 | 169 | 9.6    | 4.1    |
| chr3, mir-570            | 3 | 196898365 | 196932461 | 34 | 38  | 19.2 * | 13.7 * |
| chr4, mir-571            | 4 | 316946    | 351041    | 34 | 17  | 0      | 6.8    |
| chr4, mir-95             | 4 | 8108099   | 8142179   | 34 | 70  | 0      | 5.5    |
| chr4, mir-572            | 4 | 11029720  | 11063814  | 34 | 79  | 0      | 6.8    |
| chr4, mir-218-1          | 4 | 20189167  | 20223276  | 34 | 155 | 0      | 6.8    |
| chr4, mir-573            | 4 | 24181084  | 24215182  | 34 | 127 | 0      | 6.8    |
| chr4, mir-574            | 4 | 38675219  | 38709314  | 34 | 99  | 0      | 4.1    |

|                          |   |           |           |     |     |      |        |
|--------------------------|---|-----------|-----------|-----|-----|------|--------|
| chr4, mir-575            | 4 | 84014669  | 84048762  | 34  | 103 | 0    | 5.5    |
| chr4, mir-576            | 4 | 110750458 | 110784555 | 34  | 116 | 0    | 5.5    |
| chr4, mir-367, mir-302d, | 4 | 113909634 | 113944317 | 34  | 132 | 0    | 5.5    |
| chr4, mir-577            | 4 | 115918519 | 115952614 | 34  | 166 | 0    | 8.2    |
| chr4, mir-578            | 4 | 166647999 | 166682094 | 34  | 126 | 1.4  | 6.8    |
| chr5, Drosha             | 5 | 31419926  | 31584925  | 164 | 612 | 8.2  | 0      |
| chr5, mir-579            | 5 | 32413241  | 32447338  | 34  | 147 | 8.2  | 0      |
| chr5, mir-580            | 5 | 36166751  | 36200847  | 34  | 125 | 9.6  | 0      |
| chr5, mir-581            | 5 | 53266091  | 53300186  | 34  | 134 | 6.8  | 2.7    |
| chr5, mir-449, mir-449b  | 5 | 54485117  | 54519327  | 34  | 138 | 5.5  | 0      |
| chr5, mir-582            | 5 | 59018189  | 59052286  | 34  | 120 | 6.8  | 0      |
| chr5, mir-9-2            | 5 | 87981427  | 88015513  | 34  | 160 | 5.5  | 1.4    |
| chr5, mir-583            | 5 | 95423598  | 95457672  | 34  | 133 | 5.5  | 2.7    |
| chr5, mir-584            | 5 | 148405069 | 148439165 | 34  | 83  | 5.5  | 0      |
| chr5, mir-143, mir-145   | 5 | 148771674 | 148807489 | 35  | 101 | 5.5  | 0      |
| chr5, mir-378            | 5 | 149075581 | 149109646 | 34  | 83  | 5.5  | 1.4    |
| chr5, mir-146a           | 5 | 159827937 | 159862035 | 34  | 99  | 4.1  | 0      |
| chr5, mir-103-1          | 5 | 167903479 | 167937556 | 34  | 132 | 5.5  | 1.4    |
| chr5, mir-218-2          | 5 | 168110729 | 168144838 | 34  | 107 | 4.1  | 0      |
| chr5, mir-585            | 5 | 168606183 | 168640276 | 34  | 110 | 4.1  | 1.4    |
| chr5, mir-340            | 5 | 179357909 | 179392003 | 34  | 93  | 5.5  | 1.4    |
| chr6, mir-548a-1         | 6 | 18662994  | 18697090  | 34  | 123 | 6.8  | 2.7    |
| chr6, mir-219-1          | 6 | 33266590  | 33300699  | 34  | 97  | 8.2  | 2.7    |
| chr6, XPO5               | 6 | 43581050  | 43668642  | 87  | 312 | 8.2  | 0      |
| chr6, mir-586            | 6 | 45256389  | 45290485  | 34  | 116 | 6.8  | 1.4    |
| chr6, mir-206, mir-133b  | 6 | 52100106  | 52138798  | 38  | 139 | 8.2  | 1.4    |
| chr6, mir-30c-2, mir-30a | 6 | 72126384  | 72187045  | 60  | 264 | 2.7  | 8.2    |
| chr6, mir-587            | 6 | 107321693 | 107355788 | 34  | 110 | 4.1  | 12.3 * |
| chr6, mir-548b           | 6 | 119414911 | 119449007 | 34  | 113 | 4.1  | 15.1 * |
| chr6, mir-588            | 6 | 126830470 | 126864552 | 34  | 61  | 2.7  | 17.8 * |
| chr6, mir-548a-2         | 6 | 135584991 | 135619087 | 34  | 127 | 2.7  | 17.8 * |
| chr7, mir-339            | 7 | 818810    | 852903    | 34  | 38  | 2.7  | 1.4    |
| chr7, mir-589            | 7 | 5291691   | 5325789   | 34  | 51  | 9.6  | 1.4    |
| chr7, mir-148a           | 7 | 25745779  | 25779846  | 34  | 96  | 13.7 | 0      |
| chr7, mir-196b           | 7 | 26965339  | 26999422  | 34  | 96  | 13.7 | 0      |
| chr7, mir-550-1          | 7 | 30085650  | 30119746  | 34  | 81  | 13.7 | 0      |
| chr7, has-mir-550-2      | 7 | 32528833  | 32562929  | 34  | 1   | 13.7 | 0      |

|                             |   |           |           |     |      |        |        |
|-----------------------------|---|-----------|-----------|-----|------|--------|--------|
| chr7, mir-590               | 7 | 73033179  | 73067275  | 34  | 93   | 15.1   | 1.4    |
| chr7, mir-653, mir-489      | 7 | 92739723  | 92774982  | 35  | 160  | 20.5 * | 0      |
| chr7, mir-591               | 7 | 95476625  | 95510719  | 34  | 125  | 11     | 0      |
| chr7, mir-25, mir-93, mi    | 7 | 99318834  | 99353348  | 34  | 113  | 6.8    | 0      |
| chr7, mir-592               | 7 | 126275093 | 126309189 | 34  | 130  | 13.7   | 2.7    |
| chr7, SDN1, mir-593         | 7 | 126869153 | 127332963 | 463 | 1842 | 13.7   | 2.7    |
| chr7, mir-129-1             | 7 | 127424876 | 127458947 | 34  | 89   | 15.1   | 2.7    |
| chr7, mir-182, mir-96, n    | 7 | 128987174 | 129025805 | 38  | 99   | 6.8    | 1.4    |
| chr7, mir-335               | 7 | 129712903 | 129746996 | 34  | 128  | 13.7   | 4.1    |
| chr7, mir-29a, mir-29b-1    | 7 | 130001761 | 130036553 | 34  | 95   | 15.1   | 4.1    |
| chr7, mir-490               | 7 | 136028169 | 136062296 | 34  | 169  | 11     | 2.7    |
| chr7, has-mir-594           | 7 | 138465712 | 138499800 | 34  | 84   | 12.3   | 1.4    |
| chr7, mir-671               | 7 | 150356155 | 150390272 | 34  | 104  | 2.7    | 0      |
| chr7, mir-153-2             | 7 | 156849504 | 156883590 | 34  | 86   | 12.3   | 0      |
| chr7, mir-595               | 7 | 157807886 | 157841981 | 34  | 81   | 9.6    | 0      |
| chr8, mir-596               | 8 | 1735804   | 1769880   | 34  | 69   | 4.1    | 13.7 * |
| chr8, mir-597               | 8 | 9619592   | 9653688   | 34  | 145  | 4.1    | 8.2    |
| chr8, mir-124a-1            | 8 | 9781308   | 9815392   | 34  | 112  | 4.1    | 11 *   |
| chr8, mir-598               | 8 | 10913126  | 10947222  | 34  | 87   | 5.5    | 8.2    |
| chr8, mir-383               | 8 | 14738318  | 14772390  | 34  | 110  | 4.1    | 8.2    |
| chr8, mir-320, PIWIL2       | 8 | 22141420  | 22286545  | 145 | 344  | 4.1    | 9.6    |
| chr8, mir-486               | 8 | 41620116  | 41654183  | 34  | 85   | 8.2    | 4.1    |
| chr8, mir-124a-2            | 8 | 65437260  | 65471368  | 34  | 156  | 9.6    | 2.7    |
| chr8, mir-599               | 8 | 100601040 | 100635134 | 34  | 149  | 9.6    | 1.4    |
| chr8, mir-548a-3            | 8 | 105548773 | 105582869 | 34  | 122  | 11     | 1.4    |
| chr8, mir-548d-1            | 8 | 124412455 | 124446551 | 34  | 134  | 13.7   | 2.7    |
| chr8, mir-30b, mir-30d      | 8 | 135864945 | 135903370 | 38  | 152  | 9.6    | 1.4    |
| chr8, AGO2                  | 8 | 141593446 | 141731827 | 138 | 324  | 9.6    | 1.4    |
| chr8, mir-151               | 8 | 141794845 | 141828934 | 34  | 120  | 12.3   | 1.4    |
| chr8, mir-661               | 8 | 145074347 | 145108435 | 34  | 37   | 4.1    | 0      |
| chr9, mir-101-2             | 9 | 4823297   | 4857375   | 34  | 151  | 12.3   | 8.2    |
| chr9, mir-491               | 9 | 20689104  | 20723187  | 34  | 134  | 11     | 11 *   |
| chr9, mir-31                | 9 | 21485114  | 21519184  | 34  | 118  | 8.2    | 17.8 * |
| chr9, mir-204               | 9 | 70637445  | 70671554  | 34  | 137  | 4.1    | 1.4    |
| chr9, mir-7-1               | 9 | 83797217  | 83831326  | 34  | 120  | 5.5    | 5.5    |
| chr9, let-7a-1, let-7f-1, l | 9 | 94000794  | 94037757  | 36  | 97   | 6.8    | 0      |
| chr9, mir-23b, mir-27b,     | 9 | 94910045  | 94944925  | 34  | 105  | 2.7    | 0      |

|                          |    |           |           |    |     |      |     |
|--------------------------|----|-----------|-----------|----|-----|------|-----|
| chr9, mir-32             | 9  | 108871064 | 108905133 | 34 | 128 | 6.8  | 1.4 |
| chr9, mir-455            | 9  | 114034268 | 114068363 | 34 | 105 | 2.7  | 0   |
| chr9, mir-147            | 9  | 120069811 | 120103882 | 34 | 96  | 2.7  | 0   |
| chr9, mir-600            | 9  | 122936379 | 122970476 | 34 | 137 | 4.1  | 0   |
| chr9, mir-601            | 9  | 123227358 | 123261436 | 34 | 96  | 2.7  | 0   |
| chr9, mir-181a-2, mir-18 | 9  | 124517275 | 124552631 | 35 | 116 | 5.5  | 0   |
| chr9, mir-199b           | 9  | 128069554 | 128103663 | 34 | 55  | 2.7  | 0   |
| chr9, mir-219-2          | 9  | 128217451 | 128251547 | 34 | 76  | 4.1  | 0   |
| chr9, mir-126            | 9  | 136823891 | 136857975 | 34 | 27  | 2.7  | 1.4 |
| chr9, mir-602            | 9  | 137991708 | 138025805 | 34 | 38  | 5.5  | 2.7 |
| chr10, mir-511-1         | 10 | 17910113  | 17944199  | 34 | 2   | 6.8  | 4.1 |
| chr10, mir-603           | 10 | 24587620  | 24621716  | 34 | 121 | 6.8  | 4.1 |
| chr10, mir-604           | 10 | 29856939  | 29891032  | 34 | 135 | 4.1  | 4.1 |
| chr10, mir-605           | 10 | 52712339  | 52746421  | 34 | 137 | 4.1  | 1.4 |
| chr10, mir-606           | 10 | 76965222  | 76999317  | 34 | 93  | 4.1  | 0   |
| chr10, mir-346           | 10 | 87997424  | 88031509  | 34 | 74  | 5.5  | 6.8 |
| chr10, mir-107           | 10 | 91325484  | 91359564  | 34 | 114 | 2.7  | 9.6 |
| chr10, mir-607           | 10 | 98561416  | 98595511  | 34 | 97  | 4.1  | 9.6 |
| chr10, mir-608           | 10 | 102707732 | 102741831 | 34 | 121 | 1.4  | 2.7 |
| chr10, mir-146b          | 10 | 104169259 | 104203331 | 34 | 62  | 1.4  | 4.1 |
| chr10, mir-609           | 10 | 105951537 | 105985631 | 34 | 113 | 2.7  | 2.7 |
| chr10, mir-202           | 10 | 134932897 | 134967006 | 34 | 41  | 0    | 0   |
| chr11, mir-210           | 11 | 541089    | 575198    | 34 | 44  | 0    | 0   |
| chr11, mir-483           | 11 | 2094940   | 2129015   | 34 | 66  | 5.5  | 1.4 |
| chr11, mir-610           | 11 | 28017938  | 28052033  | 34 | 139 | 6.8  | 1.4 |
| chr11, mir-129-2         | 11 | 43542520  | 43576609  | 34 | 143 | 6.8  | 0   |
| chr11, mir-130a          | 11 | 57148247  | 57182335  | 34 | 87  | 6.8  | 0   |
| chr11, mir-611           | 11 | 61299543  | 61333609  | 34 | 117 | 4.1  | 0   |
| chr11, mir-192, mir-194- | 11 | 64398185  | 64432487  | 34 | 58  | 4.1  | 0   |
| chr11, mir-612           | 11 | 64951505  | 64985604  | 34 | 77  | 8.2  | 5.5 |
| chr11, MALAT1            | 11 | 65005410  | 65047999  | 42 | 98  | 8.2  | 6.8 |
| chr11, mir-139           | 11 | 71986755  | 72020822  | 34 | 83  | 4.1  | 0   |
| chr11, mir-326           | 11 | 74706784  | 74740878  | 34 | 72  | 4.1  | 0   |
| chr11, PIWIL4            | 11 | 93923182  | 94011234  | 88 | 295 | 8.2  | 1.4 |
| chr11, mir-34b, mir-34c  | 11 | 110871873 | 110906450 | 34 | 146 | 15.1 | 2.7 |
| chr11, mir-125b-1        | 11 | 121458675 | 121492762 | 34 | 168 | 8.2  | 6.8 |
| chr11, let-7a-2, mir-100 | 11 | 121505440 | 121545226 | 39 | 182 | 8.2  | 8.2 |

|                          |    |           |           |     |     |        |        |
|--------------------------|----|-----------|-----------|-----|-----|--------|--------|
| chr12, mir-200c, mir-141 | 12 | 6926123   | 6960615   | 34  | 107 | 12.3   | 0      |
| chr12, mir-613           | 12 | 12791850  | 12825944  | 34  | 81  | 11     | 2.7    |
| chr12, mir-614           | 12 | 12943030  | 12977119  | 34  | 114 | 12.3   | 2.7    |
| chr12, mir-196a-2        | 12 | 52654789  | 52688898  | 34  | 107 | 16.4   | 0      |
| chr12, mir-615           | 12 | 52697001  | 52731096  | 34  | 122 | 17.8   | 0      |
| chr12, mir-148b          | 12 | 53000267  | 53034365  | 34  | 118 | 20.5 * | 0      |
| chr12, mir-616           | 12 | 56182213  | 56216309  | 34  | 99  | 15.1   | 0      |
| chr12, mir-26a-2         | 12 | 56487659  | 56521742  | 34  | 115 | 17.8   | 0      |
| chr12, let-7i            | 12 | 61266733  | 61300816  | 34  | 162 | 12.3   | 4.1    |
| chr12, mir-548c          | 12 | 63285556  | 63319652  | 34  | 120 | 13.7   | 2.7    |
| chr12, mir-617           | 12 | 79711780  | 79745876  | 34  | 137 | 9.6    | 0      |
| chr12, mir-618           | 12 | 79814983  | 79849080  | 34  | 145 | 8.2    | 0      |
| chr12, mir-492           | 12 | 93713642  | 93747757  | 34  | 68  | 8.2    | 0      |
| chr12, mir-331           | 12 | 94187664  | 94221757  | 34  | 131 | 8.2    | 1.4    |
| chr12, mir-135a-2        | 12 | 96443058  | 96477157  | 34  | 150 | 5.5    | 0      |
| chr12, mir-619           | 12 | 107716150 | 107750248 | 34  | 116 | 8.2    | 1.4    |
| chr12, mir-620           | 12 | 115032085 | 115066179 | 34  | 149 | 6.8    | 0      |
| chr12, PIWIL1            | 12 | 129330494 | 129398753 | 68  | 238 | 5.5    | 0      |
| chr12, RAN               | 12 | 129864448 | 129903243 | 38  | 78  | 5.5    | 0      |
| chr13, mir-621           | 13 | 40265902  | 40299997  | 34  | 62  | 13.7   | 4.1    |
| chr13, mir-16-1, mir-15a | 13 | 49504110  | 49538338  | 34  | 121 | 12.3   | 13.7 * |
| chr13, mir-622           | 13 | 89664437  | 89698532  | 34  | 111 | 17.8   | 5.5    |
| chr13, mir-17, mir-18a,  | 13 | 90783860  | 90818646  | 34  | 133 | 24.7 * | 5.5    |
| chr13, mir-623           | 13 | 98789386  | 98823483  | 34  | 99  | 16.4   | 8.2    |
| chr14, mir-208           | 14 | 22910645  | 22944715  | 34  | 109 | 2.7    | 0      |
| chr14, mir-624           | 14 | 30536603  | 30570699  | 34  | 84  | 2.7    | 1.4    |
| chr14, mir-625           | 14 | 64990573  | 65024657  | 34  | 87  | 5.5    | 1.4    |
| chr14, Dicer1            | 14 | 94605319  | 94710512  | 105 | 413 | 4.1    | 2.7    |
| chr14, mir-342           | 14 | 99628745  | 99662843  | 34  | 96  | 4.1    | 1.4    |
| chr14, mir-345           | 14 | 99826949  | 99861046  | 34  | 54  | 1.4    | 1.4    |
| chr14, mir-770, mir-493, | 14 | 100371480 | 100464303 | 92  | 298 | 4.1    | 1.4    |
| chr14, mir-379, mir-411, | 14 | 100541156 | 100619891 | 78  | 230 | 4.1    | 1.4    |
| chr14, mir-203           | 14 | 103636495 | 103670604 | 34  | 34  | 2.7    | 0      |
| chr15, mir-211           | 15 | 29127527  | 29161636  | 34  | 98  | 1.4    | 2.7    |
| chr15, mir-626           | 15 | 39754075  | 39788168  | 34  | 85  | 2.7    | 4.1    |
| chr15, mir-627           | 15 | 40262060  | 40296156  | 34  | 98  | 1.4    | 5.5    |
| chr15, mir-628           | 15 | 53435430  | 53469524  | 34  | 132 | 1.4    | 1.4    |

|                          |    |          |          |    |     |     |     |
|--------------------------|----|----------|----------|----|-----|-----|-----|
| chr15, mir-190           | 15 | 60886209 | 60920293 | 34 | 135 | 1.4 | 0   |
| chr15, mir-422a          | 15 | 61933182 | 61967271 | 34 | 90  | 1.4 | 1.4 |
| chr15, mir-629           | 15 | 68141765 | 68175861 | 34 | 125 | 2.7 | 0   |
| chr15, mir-630           | 15 | 70649612 | 70683708 | 34 | 115 | 1.4 | 1.4 |
| chr15, mir-631           | 15 | 73416005 | 73450079 | 34 | 79  | 0   | 2.7 |
| chr15, mir-184           | 15 | 77272185 | 77306268 | 34 | 112 | 0   | 1.4 |
| chr15, mir-549           | 15 | 78904374 | 78938469 | 34 | 111 | 0   | 1.4 |
| chr15, mir-7-2           | 15 | 86939060 | 86973169 | 34 | 84  | 0   | 1.4 |
| chr15, mir-9-3           | 15 | 87695252 | 87729341 | 34 | 98  | 0   | 1.4 |
| chr16, mir-662           | 16 | 743184   | 777278   | 34 | 26  | 1.4 | 0   |
| chr16, mir-193b, mir-36f | 16 | 14288325 | 14327729 | 39 | 92  | 2.7 | 0   |
| chr16, mir-484           | 16 | 15627652 | 15661730 | 34 | 115 | 5.5 | 0   |
| chr16, mir-138-2         | 16 | 55432931 | 55467014 | 34 | 108 | 4.1 | 4.1 |
| chr16, mir-328           | 16 | 65776725 | 65810799 | 34 | 98  | 4.1 | 1.4 |
| chr16, mir-140           | 16 | 68507485 | 68541584 | 34 | 82  | 6.8 | 2.7 |
| chr16, mir-768           | 16 | 70332796 | 70366899 | 34 | 152 | 6.8 | 2.7 |
| chr17, mir-22            | 17 | 1546947  | 1581031  | 34 | 75  | 0   | 5.5 |
| chr17, mir-132, mir-212  | 17 | 1882952  | 1917424  | 34 | 63  | 0   | 6.8 |
| chr17, mir-195, mir-497  | 17 | 6844658  | 6879065  | 34 | 103 | 0   | 6.8 |
| chr17, mir-324           | 17 | 7050340  | 7084422  | 34 | 112 | 0   | 5.5 |
| chr17, mir-33b           | 17 | 17640875 | 17674970 | 34 | 72  | 1.4 | 2.7 |
| chr17, mir-451, mir-144  | 17 | 24195513 | 24229762 | 34 | 54  | 5.5 | 0   |
| chr17, mir-423           | 17 | 25451223 | 25485316 | 34 | 95  | 5.5 | 0   |
| chr17, mir-193a, mir-36f | 17 | 26894128 | 26943653 | 49 | 124 | 4.1 | 0   |
| chr17, mir-632           | 17 | 27684241 | 27718334 | 34 | 113 | 4.1 | 0   |
| chr17, mir-152           | 17 | 43452526 | 43486612 | 34 | 108 | 6.8 | 0   |
| chr17, mir-10a           | 17 | 43995199 | 44029308 | 34 | 118 | 5.5 | 0   |
| chr17, mir-196a-1        | 17 | 44047851 | 44081920 | 34 | 102 | 5.5 | 0   |
| chr17, mir-142           | 17 | 53746592 | 53780678 | 34 | 82  | 4.1 | 0   |
| chr17, mir-454, mir-301  | 17 | 54552901 | 54600364 | 47 | 135 | 8.2 | 0   |
| chr17, mir-21            | 17 | 55256409 | 55290480 | 34 | 109 | 5.5 | 4.1 |
| chr17, mir-633           | 17 | 58358308 | 58392405 | 34 | 78  | 5.5 | 0   |
| chr17, mir-634           | 17 | 62196652 | 62230748 | 34 | 119 | 5.5 | 0   |
| chr17, mir-548d-2        | 17 | 62881067 | 62915163 | 34 | 89  | 5.5 | 0   |
| chr17, mir-635           | 17 | 63915187 | 63949284 | 34 | 87  | 5.5 | 0   |
| chr17, mir-636           | 17 | 72227127 | 72261225 | 34 | 113 | 6.8 | 0   |
| chr17, mir-657, mir-338  | 17 | 76696671 | 76731344 | 34 | 41  | 0   | 0   |

|                           |    |          |          |     |     |      |     |
|---------------------------|----|----------|----------|-----|-----|------|-----|
| chr18, mir-133a-1, mir-1  | 18 | 17642657 | 17680047 | 37  | 144 | 12.3 | 1.4 |
| chr18, mir-187            | 18 | 31721779 | 31755887 | 34  | 69  | 13.7 | 4.1 |
| chr18, mir-122a           | 18 | 54252286 | 54286370 | 34  | 100 | 17.8 | 4.1 |
| chr19, mir-637            | 19 | 3895412  | 3929510  | 34  | 39  | 0    | 0   |
| chr19, mir-7-3            | 19 | 4704682  | 4738791  | 34  | 50  | 1.4  | 0   |
| chr19, mir-638            | 19 | 10673080 | 10707179 | 34  | 45  | 2.7  | 0   |
| chr19, mir-199a-1         | 19 | 10772102 | 10806172 | 34  | 51  | 2.7  | 0   |
| chr19, mir-24-2, mir-27a  | 19 | 13791101 | 13825473 | 34  | 52  | 1.4  | 0   |
| chr19, mir-181c, mir-181  | 19 | 13829513 | 13863825 | 34  | 55  | 2.7  | 0   |
| chr19, mir-639            | 19 | 14484355 | 14518452 | 34  | 75  | 1.4  | 0   |
| chr19, mir-640            | 19 | 19389872 | 19423967 | 34  | 104 | 2.7  | 2.7 |
| chr19, mir-641            | 19 | 45463290 | 45497388 | 34  | 55  | 4.1  | 0   |
| chr19, mir-330            | 19 | 50817092 | 50851185 | 34  | 49  | 5.5  | 0   |
| chr19, mir-642            | 19 | 50853026 | 50887122 | 34  | 53  | 4.1  | 0   |
| chr19, mir-769            | 19 | 51197030 | 51231147 | 34  | 57  | 4.1  | 0   |
| chr19, mir-150            | 19 | 54678854 | 54712937 | 34  | 63  | 5.5  | 0   |
| chr19, mir-99b, let-7e, r | 19 | 56870677 | 56905404 | 34  | 70  | 4.1  | 0   |
| chr19, mir-643            | 19 | 57459862 | 57493958 | 34  | 79  | 5.5  | 0   |
| chr19, mir-512-1, mir-51  | 19 | 58844745 | 59000839 | 156 | 194 | 5.5  | 0   |
| chr20, mir-103-2          | 20 | 3829141  | 3863218  | 34  | 117 | 8.2  | 0   |
| chr20, mir-663            | 20 | 26119822 | 26153914 | 34  | 26  | 2.7  | 2.7 |
| chr20, mir-644            | 20 | 32500791 | 32534884 | 34  | 108 | 12.3 | 1.4 |
| chr20, mir-499            | 20 | 33024840 | 33058961 | 34  | 75  | 6.8  | 0   |
| chr20, mir-645            | 20 | 48618730 | 48652823 | 34  | 107 | 6.8  | 2.7 |
| chr20, mir-296            | 20 | 56809065 | 56843144 | 34  | 95  | 5.5  | 2.7 |
| chr20, mir-646            | 20 | 58299927 | 58334020 | 34  | 98  | 2.7  | 4.1 |
| chr20, mir-1-1, mir-133a  | 20 | 60544958 | 60589665 | 44  | 64  | 4.1  | 0   |
| chr20, mir-124a-3         | 20 | 61263297 | 61297383 | 34  | 56  | 4.1  | 0   |
| chr20, mir-647            | 20 | 62027428 | 62061523 | 34  | 52  | 4.1  | 0   |
| chr21, mir-99a, let-7c    | 21 | 16816280 | 16851102 | 34  | 129 | 2.7  | 0   |
| chr21, mir-125b-2         | 21 | 16867428 | 16901516 | 34  | 162 | 4.1  | 1.4 |
| chr21, mir-155            | 21 | 25851163 | 25885227 | 34  | 145 | 2.7  | 2.7 |
| chr21, mir-802            | 21 | 35997883 | 36031976 | 34  | 124 | 4.1  | 0   |
| chr22, mir-648            | 22 | 16821188 | 16855281 | 34  | 74  | 1.4  | 2.7 |
| chr22, mir-185            | 22 | 18378216 | 18412297 | 34  | 70  | 0    | 1.4 |
| chr22, DGCR8-Pasha        | 22 | 18425388 | 18490954 | 65  | 112 | 0    | 1.4 |
| chr22, mir-649            | 22 | 19696019 | 19730115 | 34  | 47  | 0    | 1.4 |



|                          |   |    |           |           |     |     |        |        |
|--------------------------|---|----|-----------|-----------|-----|-----|--------|--------|
| chr22, mir-130b          |   | 22 | 20315147  | 20349228  | 34  | 57  | 0      | 1.4    |
| chr22, mir-650           |   | 22 | 21472824  | 21506919  | 34  | 78  | 8.2    | 31.5 * |
| chr22, PIWIL3            |   | 22 | 23422555  | 23512237  | 89  | 211 | 0      | 1.4    |
| chr22, mir-658, mir-659  |   | 22 | 36547779  | 36585281  | 37  | 79  | 1.4    | 0      |
| chr22, mir-33            |   | 22 | 40604448  | 40638516  | 34  | 72  | 0      | 0      |
| chr22, let-7a-3, let-7b  |   | 22 | 44812148  | 44847167  | 35  | 51  | 0      | 0      |
| chrX, mir-651            | X |    | 7887742   | 7921838   | 34  | 125 | 17.8   | 5.5    |
| chrX, mir-221, mir-222   | X |    | 45344839  | 45379784  | 34  | 106 | 20.5 * | 6.8    |
| chrX, mir-532, mir-188,  | X |    | 49453790  | 49499327  | 45  | 114 | 20.5 * | 4.1    |
| chrX, mir-98, let-7f-2   | X |    | 53449205  | 53484256  | 35  | 139 | 20.5 * | 4.1    |
| chrX, mir-223            | X |    | 65004733  | 65038842  | 34  | 128 | 19.2 * | 5.5    |
| chrX, mir-421            | X |    | 73204233  | 73238317  | 34  | 98  | 19.2 * | 6.8    |
| chrX, mir-545, mir-374   | X |    | 73272960  | 73307213  | 34  | 123 | 19.2 * | 6.8    |
| chrX, mir-384            | X |    | 75905388  | 75939475  | 34  | 56  | 16.4   | 6.8    |
| chrX, mir-325            | X |    | 75991516  | 76025613  | 34  | 44  | 17.8   | 6.8    |
| chrX, mir-361            | X |    | 84947786  | 84981857  | 34  | 93  | 16.4   | 8.2    |
| chrX, mir-652            | X |    | 109087702 | 109121799 | 34  | 107 | 15.1   | 6.8    |
| chrX, mir-448            | X |    | 113863997 | 113898107 | 34  | 80  | 16.4   | 8.2    |
| chrX, mir-766            | X |    | 118545583 | 118579693 | 34  | 92  | 13.7   | 5.5    |
| chrX, mir-220            | X |    | 122404481 | 122438590 | 34  | 41  | 15.1   | 6.8    |
| chrX, mir-363, mir-92-2, | X |    | 133011928 | 133046828 | 34  | 130 | 21.9 * | 6.8    |
| chrX, mir-450-1, mir-450 | X |    | 133382891 | 133423261 | 40  | 132 | 20.5 * | 6.8    |
| chrX, mir-504            | X |    | 137458392 | 137492474 | 34  | 130 | 21.9 * | 8.2    |
| chrX, mir-505            | X |    | 138714827 | 138748910 | 34  | 91  | 20.5 * | 6.8    |
| chrX, mir-513-1, mir-513 | X |    | 145983527 | 146088792 | 105 | 194 | 24.7 * | 8.2    |
| chrX, FMR1               | X |    | 146682055 | 146755157 | 73  | 282 | 23.3 * | 9.6    |
| chrX, mir-224, mir-452   | X |    | 150780618 | 150815752 | 35  | 129 | 23.3 * | 5.5    |
| chrX, mir-105-1, mir-767 | X |    | 151214259 | 151250532 | 36  | 90  | 24.7 * | 6.8    |
