# Supplementary material
Source: PubMed Central journal article supplement (PMC3401058)
Supplement: supp_blood-2009-01-202028_TableS3.pdf [file supp_blood-2009-01-202028_TableS3.pdf]

Also included are four normal DNA samples, DS= dye swap

| TUMOR ID        | 1143    | 1650    | 3002    | 3122    | 3271    | 3409    | 3466    | 4021    |
|-----------------|---------|---------|---------|---------|---------|---------|---------|---------|
| MiRNA ID        |         |         |         |         |         |         |         |         |
| chr1, mir-200b, | 2.08349 | 2.10302 | 1.8993  | 1.93768 | 2.27721 | 2.0107  | 1.8907  | 2.13163 |
| chr1, mir-551a  | 2.09    | 1.96065 | 1.76774 | 1.90484 | 2.26226 | 1.98871 | 1.8571  | 2.2071  |
| chr1, mir-34a   | 2.05773 | 2.02867 | 1.7224  | 2.02213 | 2.21227 | 2.14947 | 2.03013 | 2.1852  |
| chr1, mir-801   | 2.00738 | 2.02024 | 1.58286 | 2.00929 | 2.13452 | 2.22929 | 2.10833 | 2.09762 |
| chr1, mir-552   | 2.07753 | 2.03714 | 1.76636 | 2.11467 | 2.20182 | 2.10519 | 2.02662 | 2.14844 |
| chr1, AGO4, A   | 1.9283  | 1.94251 | 1.57243 | 2.0396  | 2.02514 | 2.18995 | 2.19427 | 2.07534 |
| chr1, mir-30e,  | 1.98669 | 1.96816 | 1.68713 | 2.07551 | 2.13897 | 2.17059 | 2.08221 | 2.12088 |
| chr1, mir-101-1 | 1.99071 | 2.05564 | 1.6369  | 2.12294 | 2.10746 | 2.24373 | 2.04833 | 1.99421 |
| chr1, SERBP1    | 1.96636 | 1.9806  | 1.58658 | 2.08848 | 2.03631 | 2.13772 | 2.07261 | 2.04185 |
| chr1, mir-186   | 2.01872 | 2.0651  | 1.69651 | 2.2659  | 2.05732 | 2.14624 | 2.15953 | 1.92127 |
| chr1, mir-137   | 1.99369 | 2.02403 | 1.62591 | 2.22631 | 1.11994 | 2.1329  | 2.12722 | 1.87477 |
| chr1, mir-553   | 1.992   | 1.99888 | 1.58488 | 2.1432  | 1.19872 | 2.162   | 2.11976 | 1.99792 |
| chr1, mir-197   | 1.97489 | 1.98575 | 1.64192 | 2.10993 | 2.04312 | 2.20341 | 2.12858 | 2.08298 |
| chr1, DDX20     | 1.98368 | 1.98573 | 1.67362 | 2.06205 | 2.10865 | 2.15449 | 2.15513 | 2.12189 |
| chr1, mir-554   | 1.9625  | 2.25381 | 1.66405 | 1.99071 | 2.78012 | 2.04988 | 2.01464 | 2.04548 |
| chr1, mir-92b   | 2.06519 | 2.30852 | 1.7987  | 1.92602 | 2.28417 | 2.04398 | 1.89065 | 2.19861 |
| chr1, mir-555   | 1.88848 | 2.305   | 1.50571 | 1.96018 | 1.99554 | 2.10821 | 2.05339 | 2.06616 |
| chr1, mir-9-1   | 1.98252 | 2.29583 | 1.60953 | 1.96551 | 2.14496 | 2.10669 | 1.99236 | 2.12299 |
| chr1, mir-765   | 2.03252 | 2.28405 | 1.71856 | 1.96586 | 2.16216 | 2.04018 | 1.92477 | 2.12675 |
| chr1, mir-556   | 1.98547 | 2.35051 | 1.81438 | 2.06073 | 2.02869 | 2.02343 | 2.03525 | 1.98839 |
| chr1, mir-557   | 1.93803 | 2.27669 | 1.86394 | 2.05071 | 2.73102 | 2.04882 | 2.04693 | 1.95441 |
| chr1, mir-214,  | 1.92005 | 2.36395 | 1.83421 | 2.11508 | 2.79641 | 2.06651 | 2.10513 | 1.93138 |
| chr1, mir-488   | 2.03128 | 2.39723 | 1.90447 | 2.10752 | 3.01042 | 1.97589 | 2.00043 | 1.96475 |
| chr1, mir-181b- | 1.86716 | 2.78081 | 1.70088 | 2.05081 | 2.73142 | 2.08642 | 2.175   | 1.90378 |
| chr1, mir-135b  | 2.03959 | 2.755   | 1.94908 | 1.96888 | 2.91765 | 2.10571 | 1.94806 | 2.23939 |
| chr1, mir-29c,  | 2.01169 | 2.41819 | 1.885   | 2.06269 | 2.93163 | 2.12969 | 2.09081 | 2.0505  |
| chr1, mir-205   | 2.07395 | 2.45468 | 1.95532 | 2.1244  | 3.03991 | 2.01569 | 1.97771 | 1.98486 |
| chr1, mir-215,  | 1.94213 | 2.33885 | 1.73852 | 2.07516 | 2.78008 | 2.07369 | 2.10639 | 1.88533 |
| chr2, mir-558   | 1.91173 | 1.92273 | 1.52645 | 2.07282 | 1.96236 | 3.66382 | 2.16318 | 1.97191 |
| chr2, mir-559   | 1.90702 | 1.92255 | 1.54128 | 2.0217  | 2.0084  | 2.90521 | 2.13947 | 2.11883 |
| chr2, mir-217,  | 1.92649 | 1.9253  | 1.5759  | 2.11082 | 2.0406  | 2.71261 | 2.1106  | 1.99642 |

|                  |         |         |         |         |         |         |         |         |
|------------------|---------|---------|---------|---------|---------|---------|---------|---------|
| chr2, mir-560    | 2.22222 | 2.39111 | 1.91    | 2.09556 | 2.13667 | 2.20889 | 2.15556 | 2.05778 |
| chr2, mir-128a   | 1.90699 | 1.94684 | 1.81774 | 2.11143 | 1.99767 | 2.21263 | 2.21451 | 1.98203 |
| chr2, mir-10b    | 2.05756 | 2.03672 | 1.92042 | 2.12866 | 2.13529 | 2.07269 | 2.0474  | 2.07042 |
| chr2, mir-561    | 2.00734 | 2.05439 | 1.81568 | 2.26043 | 2.02288 | 2.0759  | 2.11388 | 1.86245 |
| chr2, mir-26b    | 2.03136 | 2.06525 | 1.97983 | 1.96576 | 2.16932 | 2.05881 | 1.97153 | 2.77356 |
| chr2, mir-375    | 2.0772  | 2.01398 | 1.9828  | 1.98677 | 2.30312 | 2.06645 | 1.94538 | 2.90258 |
| chr2, mir-153-1  | 2.05692 | 2.02897 | 1.95949 | 1.99654 | 2.26487 | 2.08487 | 1.97615 | 3.00141 |
| chr2, mir-562    | 1.93183 | 1.96317 | 1.857   | 2.08167 | 2.0205  | 2.10733 | 2.17033 | 2.92817 |
| chr2, mir-149    | 2.082   | 2.00925 | 2.08425 | 1.979   | 2.126   | 2.031   | 1.95825 | 2.542   |
| chr3, mir-563    | 1.93746 | 1.84302 | 1.58317 | 2.08746 | 2.03937 | 2.11667 | 2.21476 | 2.04841 |
| chr3, mir-128b   | 2.0014  | 2.00561 | 1.60262 | 2.2275  | 2.03921 | 2.0303  | 2.09396 | 1.93031 |
| chr3, mir-26a-1  | 1.9775  | 1.98952 | 1.66331 | 2.10097 | 2.02782 | 2.10339 | 2.07911 | 2.04073 |
| chr3, mir-138-1  | 2.07183 | 2.01571 | 1.73698 | 2.14659 | 2.21738 | 1.4546  | 1.95151 | 2.19675 |
| chr3, mir-564    | 2.03043 | 2.03837 | 1.71304 | 2.14424 | 2.14478 | 1.53587 | 1.99022 | 2.11554 |
| chr3, mir-565    | 1.97581 | 1.98782 | 1.61185 | 2.06653 | 2.0771  | 1.49718 | 2.09839 | 2.01137 |
| chr3, mir-425, l | 2.05636 | 2.0497  | 1.81182 | 2.04313 | 2.29606 | 1.59747 | 2.06778 | 2.24919 |
| chr3, mir-566    | 2.0122  | 1.99729 | 1.84102 | 1.98814 | 2.13407 | 1.62983 | 2.00881 | 2.09136 |
| chr3, let-7g, mi | 2.01133 | 2.0253  | 1.68359 | 2.01923 | 2.15652 | 1.54569 | 2.0742  | 2.17083 |
| chr3, mir-567    | 1.9889  | 1.88949 | 1.6181  | 2.14161 | 2.13131 | 2.18467 | 2.16489 | 2.03504 |
| chr3, mir-568    | 1.96994 | 1.84994 | 1.62955 | 2.12299 | 2.11446 | 2.15586 | 2.19694 | 2.07363 |
| chr3, mir-198    | 1.99456 | 1.87784 | 1.67144 | 2.13256 | 2.07992 | 2.12176 | 2.17592 | 2.05504 |
| chr3, mir-15b, l | 1.92143 | 2.31688 | 2.01649 | 2.09416 | 1.98786 | 2.13461 | 2.22747 | 1.92396 |
| chr3, mir-551b   | 1.89971 | 2.27641 | 2.04447 | 2.17078 | 1.92117 | 2.04117 | 2.17223 | 1.87262 |
| chr3, mir-569    | 1.97289 | 2.27845 | 2.12756 | 2.11681 | 1.99533 | 2.01015 | 2.07319 | 1.94941 |
| chr3, mir-28     | 1.92817 | 1.97799 | 2.0974  | 2.11988 | 2.04947 | 2.13781 | 2.21    | 2.01414 |
| chr3, mir-570    | 1.90395 | 1.86553 | 2.99553 | 1.22974 | 1.46974 | 1.76342 | 1.69158 | 1.82526 |
| chr4, mir-571    | 1.90353 | 1.95765 | 1.77235 | 2.15529 | 2.03176 | 2.16941 | 2.11941 | 2.03588 |
| chr4, mir-95     | 2.09271 | 2.015   | 1.76186 | 2.09257 | 2.20743 | 2.15514 | 1.98429 | 2.141   |
| chr4, mir-572    | 2.11215 | 2.09911 | 1.67025 | 2.23848 | 2.26051 | 2.05646 | 2.09392 | 2.06051 |
| chr4, mir-218-1  | 2.04226 | 2.09271 | 1.69316 | 2.29187 | 2.05761 | 2.21129 | 2.06903 | 2.08736 |
| chr4, mir-573    | 2.07158 | 2.03961 | 1.71126 | 2.22016 | 2.08614 | 2.2352  | 2.1526  | 2.11929 |
| chr4, mir-574    | 1.9698  | 2.00687 | 1.63455 | 2.05788 | 2.08455 | 2.14768 | 2.17505 | 2.1196  |
| chr4, mir-575    | 2.03981 | 2.00359 | 1.73815 | 2.12922 | 2.20272 | 2.05903 | 2.05709 | 2.15495 |
| chr4, mir-576    | 1.98793 | 1.97784 | 1.57897 | 2.15948 | 2.00897 | 2.06879 | 2.12552 | 2.00233 |
| chr4, mir-367, l | 1.93106 | 2.00538 | 1.58068 | 2.11409 | 1.98985 | 2.08788 | 2.21636 | 1.99932 |
| chr4, mir-577    | 2.00355 | 2.01548 | 1.64367 | 2.22934 | 2.03867 | 2.0647  | 2.13392 | 1.95789 |
| chr4, mir-578    | 1.98944 | 1.68445 | 1.61691 | 2.19365 | 1.98341 | 2.07698 | 2.10333 | 1.96048 |

|                 |         |         |         |         |         |         |         |         |
|-----------------|---------|---------|---------|---------|---------|---------|---------|---------|
| chr5, Drosha    | 1.93322 | 1.94508 | 2.10569 | 2.09221 | 2.85654 | 2.05284 | 2.04678 | 1.97843 |
| chr5, mir-579   | 1.86633 | 1.88014 | 1.98204 | 2.05197 | 2.72966 | 2.14354 | 2.06265 | 1.98857 |
| chr5, mir-580   | 1.89944 | 1.93464 | 2.08448 | 2.0752  | 2.73928 | 1.99776 | 2.03176 | 1.94224 |
| chr5, mir-581   | 1.92716 | 1.9653  | 2.06052 | 2.11739 | 2.87664 | 2.0556  | 2.01246 | 1.94493 |
| chr5, mir-449,  | 1.91884 | 1.96471 | 2.07913 | 2.07181 | 2.84964 | 2.11971 | 2.06174 | 1.93268 |
| chr5, mir-582   | 1.97742 | 1.96883 | 2.0785  | 2.17475 | 2.81375 | 2.11725 | 2.093   | 1.99933 |
| chr5, mir-9-2   | 1.95969 | 2.01144 | 2.02994 | 2.07531 | 2.84256 | 2.10731 | 2.03969 | 1.95631 |
| chr5, mir-583   | 1.93902 | 1.94331 | 2.05045 | 2.13391 | 2.95    | 2.06211 | 2.20361 | 1.97398 |
| chr5, mir-584   | 1.98663 | 1.97807 | 2.17494 | 2.04072 | 2.9453  | 2.02964 | 1.98313 | 2.10337 |
| chr5, mir-143,  | 2.05119 | 1.97881 | 2.15297 | 2.00792 | 2.94485 | 2.09356 | 1.94376 | 2.22406 |
| chr5, mir-378   | 1.99145 | 1.93229 | 2.13843 | 2.01843 | 2.75831 | 2.08916 | 2.01446 | 2.13    |
| chr5, mir-146a  | 1.98525 | 1.97646 | 2.09606 | 2.09818 | 2.93747 | 2.12828 | 2.06899 | 2.00727 |
| chr5, mir-103-1 | 1.9303  | 1.96917 | 2.09174 | 2.08508 | 2.85364 | 2.06023 | 2.05886 | 1.98455 |
| chr5, mir-218-2 | 1.99925 | 1.99981 | 2.14168 | 2.06365 | 2.8057  | 2.00383 | 2.0043  | 2.01654 |
| chr5, mir-585   | 2.01073 | 1.94946 | 2.18691 | 2.10018 | 2.86818 | 2.02755 | 2.06445 | 2.053   |
| chr5, mir-340   | 1.90796 | 1.91065 | 2.07677 | 2.03269 | 2.85355 | 2.11269 | 2.10366 | 2.04516 |
| chr6, mir-548a- | 1.93439 | 1.94455 | 3.90723 | 2.0787  | 2.07431 | 2.13114 | 2.05512 | 2.05016 |
| chr6, mir-219-1 | 2.04258 | 2.04701 | 2.65526 | 1.9868  | 2.29124 | 2.06938 | 1.95588 | 2.27546 |
| chr6, XPO5      | 1.93404 | 1.95548 | 2.51077 | 1.98725 | 2.08186 | 2.14301 | 2.06362 | 2.10926 |
| chr6, mir-586   | 1.9106  | 1.97276 | 2.60009 | 2.15422 | 1.92897 | 2.09104 | 2.18845 | 1.8669  |
| chr6, mir-206,  | 1.9405  | 1.93281 | 2.65921 | 2.06885 | 2.0977  | 2.09655 | 2.11856 | 2.07216 |
| chr6, mir-30c-2 | 1.99686 | 2.0261  | 2.66382 | 2.21186 | 2.03273 | 2.0922  | 2.13136 | 2.01242 |
| chr6, mir-587   | 2.06254 | 2.03882 | 1.49718 | 2.12518 | 2.27236 | 2.18573 | 2.05791 | 3.17163 |
| chr6, mir-548b  | 2.02354 | 2.05743 | 1.40009 | 2.20717 | 1.21903 | 2.21062 | 2.1708  | 3.08903 |
| chr6, mir-588   | 1.99754 | 2.01672 | 1.31951 | 2.25853 | 1.08213 | 2.14738 | 2.24541 | 1.08197 |
| chr6, mir-548a- | 2.04425 | 2.06071 | 1.43055 | 2.18315 | 1.26567 | 2.21055 | 2.22984 | 1.20268 |
| chr7, mir-339   | 2.16737 | 1.99053 | 1.96447 | 1.91526 | 2.14684 | 1.94526 | 1.785   | 2.115   |
| chr7, mir-589   | 2.17216 | 1.87588 | 1.98647 | 1.85451 | 2.15627 | 1.96823 | 1.70627 | 2.13941 |
| chr7, mir-148a  | 2.2001  | 1.89854 | 2.05552 | 1.9749  | 2.06719 | 2.07938 | 1.96625 | 2.00698 |
| chr7, mir-196b  | 2.18021 | 1.93208 | 1.99271 | 1.95573 | 2.05281 | 2.04187 | 1.86615 | 2.01719 |
| chr7, mir-550-1 | 2.12037 | 1.89222 | 1.99506 | 1.99049 | 1.94407 | 2.08    | 2.12938 | 1.97951 |
| chr7, has-mir-5 | 2.10000 | 1.88000 | 2.06000 | 2.06000 | 1.99000 | 2.09000 | 2.04000 | 1.95000 |
| chr7, mir-590   | 2.06409 | 1.80312 | 1.94624 | 1.91624 | 1.92989 | 2.08064 | 2.00667 | 1.98989 |
| chr7, mir-653,  | 2.08862 | 1.86231 | 1.96406 | 2.01981 | 1.86125 | 1.89225 | 2.0355  | 3.37237 |
| chr7, mir-591   | 2.17928 | 1.89264 | 1.992   | 2.04624 | 1.97152 | 1.9452  | 1.89656 | 3.42552 |
| chr7, mir-25, m | 2.1392  | 1.89929 | 2.0123  | 1.83991 | 2.13239 | 1.96708 | 1.84071 | 3.74159 |
| chr7, mir-592   | 2.17885 | 1.89608 | 2.04515 | 2.06838 | 1.95362 | 1.95538 | 2.03646 | 1.92108 |

|                   |         |         |         |         |         |         |         |         |
|-------------------|---------|---------|---------|---------|---------|---------|---------|---------|
| chr7, SDN1, m     | 2.15388 | 1.87636 | 2.02189 | 2.01443 | 1.98218 | 2.00961 | 2.04995 | 1.96999 |
| chr7, mir-129-1   | 2.18326 | 1.92056 | 2.03315 | 1.92786 | 2.0182  | 2.01685 | 1.93045 | 2.07966 |
| chr7, mir-182, l  | 2.14556 | 1.89869 | 2.04909 | 1.90505 | 2.06657 | 2.02747 | 1.90252 | 2.06707 |
| chr7, mir-335     | 2.12656 | 1.88664 | 1.97305 | 2.00055 | 1.96977 | 2.01031 | 1.99422 | 1.96445 |
| chr7, mir-29a, l  | 2.15295 | 1.87874 | 2.00242 | 1.97726 | 1.97684 | 2.02379 | 2.01968 | 1.97558 |
| chr7, mir-490     | 2.1326  | 1.92574 | 1.98574 | 2.12414 | 1.92811 | 1.91858 | 1.99994 | 1.77426 |
| chr7, has-mir-5   | 2.15607 | 1.92417 | 1.95583 | 1.97809 | 1.99167 | 2.03869 | 1.97048 | 1.89738 |
| chr7, mir-671     | 2.18288 | 1.92702 | 2.04144 | 1.90923 | 2.12327 | 2.00836 | 1.83654 | 2.07231 |
| chr7, mir-153-2   | 2.15674 | 1.89488 | 1.92802 | 1.96988 | 1.99884 | 2.00267 | 2.0186  | 2.00419 |
| chr7, mir-595     | 2.13691 | 1.92395 | 2.03741 | 1.94852 | 2.1642  | 1.99617 | 1.88568 | 2.10086 |
| chr8, mir-596     | 2.36333 | 2.09217 | 1.62927 | 2.17623 | 2.24261 | 2.03116 | 2.03507 | 2.16217 |
| chr8, mir-597     | 2.31765 | 2.01552 | 1.61234 | 2.18517 | 2.04317 | 2.04641 | 2.28048 | 1.99717 |
| chr8, mir-124a-1  | 2.31009 | 2.00536 | 1.70312 | 2.1517  | 2.14304 | 2.00973 | 2.07348 | 2.14018 |
| chr8, mir-598     | 2.31689 | 2.03287 | 1.79127 | 2.06977 | 2.29931 | 1.99184 | 2.04241 | 2.20621 |
| chr8, mir-383     | 2.36864 | 2.10091 | 1.66364 | 2.34273 | 2.10882 | 1.98673 | 2.05773 | 1.96346 |
| chr8, mir-320, l  | 2.23579 | 1.99337 | 1.64288 | 2.05921 | 2.11398 | 2.08485 | 2.14093 | 2.12148 |
| chr8, mir-486     | 2.26341 | 2.02812 | 2.616   | 1.99459 | 2.22377 | 2.07553 | 1.89824 | 2.14553 |
| chr8, mir-124a-2  | 2.29814 | 2.00833 | 1.65513 | 2.22212 | 2.01583 | 2.07833 | 2.14628 | 1.92205 |
| chr8, mir-599     | 2.20121 | 1.95007 | 1.58423 | 2.1692  | 1.90772 | 2.10215 | 2.24799 | 1.8498  |
| chr8, mir-548a-1  | 2.26598 | 2.00852 | 1.61303 | 2.19902 | 1.99566 | 2.04672 | 2.0873  | 1.97115 |
| chr8, mir-548d-1  | 2.14082 | 1.89702 | 2.37493 | 2.00657 | 1.95821 | 2.16351 | 2.05448 | 1.97    |
| chr8, mir-30b, l  | 2.14467 | 1.96026 | 2.48066 | 2.09145 | 2.03434 | 2.13414 | 2.05829 | 1.98434 |
| chr8, AGO2        | 2.18469 | 1.94117 | 2.44373 | 1.95966 | 2.0325  | 2.10846 | 2.00867 | 2.05373 |
| chr8, mir-151     | 2.17375 | 1.87942 | 2.48367 | 2.023   | 1.908   | 2.156   | 2.12417 | 2.0025  |
| chr8, mir-661     | 2.12162 | 2.22568 | 2.17703 | 1.95865 | 2.23892 | 2.01351 | 1.84811 | 2.12703 |
| chr9, mir-101-2   | 1.97404 | 1.99391 | 1.67742 | 2.12828 | 2.02695 | 1.53192 | 2.23344 | 2.00662 |
| chr9, mir-491     | 1.99507 | 1.99231 | 1.5847  | 2.20515 | 1.18724 | 1.50022 | 2.29552 | 1.93448 |
| chr9, mir-31      | 1.995   | 2.0561  | 1.60814 | 2.2567  | 1.11746 | 1.49424 | 2.26729 | 1.99288 |
| chr9, mir-204     | 2.02285 | 2.00599 | 1.65569 | 2.19131 | 2.10577 | 2.09022 | 2.06861 | 2.01525 |
| chr9, mir-7-1     | 2.0035  | 2.023   | 1.61025 | 2.12633 | 2.12042 | 2.15292 | 2.07333 | 2.04033 |
| chr9, let-7a-1, l | 1.95959 | 1.9934  | 1.57959 | 2.07144 | 2.09155 | 2.12845 | 2.1265  | 2.06124 |
| chr9, mir-23b, l  | 2.0281  | 1.99562 | 1.72924 | 2.05086 | 2.15171 | 2.04467 | 1.95457 | 2.04448 |
| chr9, mir-32      | 1.98641 | 1.9618  | 1.61648 | 2.16344 | 2.03492 | 2.13773 | 2.10562 | 1.97859 |
| chr9, mir-455     | 2.04162 | 1.98638 | 1.8079  | 2.02114 | 2.25981 | 2.03219 | 1.94371 | 2.18629 |
| chr9, mir-147     | 1.97906 | 1.94688 | 1.69886 | 2.05906 | 2.09792 | 2.03542 | 2.08396 | 2.0925  |
| chr9, mir-600     | 1.96168 | 1.92577 | 1.66036 | 2.02934 | 2.02649 | 2.1192  | 2.07095 | 2.08277 |
| chr9, mir-601     | 2.01375 | 1.93365 | 1.75187 | 1.97083 | 2.13854 | 2.11052 | 1.96115 | 2.18792 |

|                  |         |         |         |         |         |         |         |         |
|------------------|---------|---------|---------|---------|---------|---------|---------|---------|
| chr9, mir-181a-  | 1.9031  | 1.92836 | 1.56664 | 2.04172 | 2.05664 | 2.12457 | 2.15707 | 2.04164 |
| chr9, mir-199b   | 2.02545 | 1.97545 | 1.78782 | 1.94691 | 2.28655 | 2.07855 | 1.94727 | 2.18382 |
| chr9, mir-219-2  | 2.02908 | 1.98289 | 1.74355 | 1.96237 | 2.21434 | 2.10447 | 1.92658 | 2.25303 |
| chr9, mir-126    | 2.0537  | 2.06556 | 1.85111 | 1.91963 | 2.23593 | 1.93333 | 1.7937  | 2.13296 |
| chr9, mir-602    | 1.95053 | 1.97211 | 1.62184 | 1.97711 | 2.20711 | 2.03711 | 2.01368 | 2.105   |
| chr10, mir-511-  | 2.26    | 1.605   | 1.97    | 2.07    | 2.215   | 2.075   | 1.975   | 2.135   |
| chr10, mir-603   | 2.27835 | 1.56537 | 1.88868 | 2.17529 | 2.15108 | 2.08182 | 2.05711 | 2.05653 |
| chr10, mir-604   | 2.28978 | 1.59444 | 1.96615 | 2.16948 | 2.0617  | 2.12711 | 2.21326 | 2.01859 |
| chr10, mir-605   | 2.25241 | 2.02934 | 1.89168 | 2.23175 | 2.03511 | 2.0816  | 2.12971 | 1.91744 |
| chr10, mir-606   | 2.2414  | 1.95473 | 1.87064 | 2.13161 | 2.07688 | 2.07011 | 2.17118 | 2.00323 |
| chr10, mir-346   | 2.28027 | 2.00851 | 2.03946 | 2.06351 | 2.17054 | 2.09013 | 2.03919 | 2.22365 |
| chr10, mir-107   | 2.2264  | 1.98684 | 2.45149 | 2.1179  | 2.0121  | 2.16667 | 2.22158 | 1.99781 |
| chr10, mir-607   | 2.18959 | 1.97423 | 2.24021 | 2.02052 | 2.07732 | 2.1765  | 2.18732 | 2.12165 |
| chr10, mir-608   | 2.01537 | 1.97669 | 2.34107 | 2.02546 | 2.18901 | 2.14372 | 2.00355 | 2.18736 |
| chr10, mir-146b  | 2.04177 | 2.02516 | 2.29484 | 1.97323 | 2.18113 | 2.0971  | 1.96564 | 2.16661 |
| chr10, mir-609   | 1.97619 | 1.95867 | 2.30469 | 2.06389 | 2.0315  | 2.08788 | 2.16301 | 2.07159 |
| chr10, mir-202   | 1.96903 | 2.01098 | 2.25146 | 1.94829 | 2.20244 | 2.05244 | 1.88488 | 2.09439 |
| chr11, mir-210   | 2.00886 | 1.96614 | 2.10682 | 1.90773 | 2.14955 | 2.06364 | 1.96023 | 2.0925  |
| chr11, mir-483   | 2.01333 | 1.99227 | 2.09182 | 2.00742 | 2.13955 | 2.08773 | 1.93379 | 2.07864 |
| chr11, mir-610   | 1.9836  | 2.01482 | 2.91525 | 2.24173 | 1.99813 | 2.08669 | 2.06892 | 1.95043 |
| chr11, mir-129-  | 1.99014 | 1.99685 | 2.82049 | 2.09224 | 2.11601 | 2.08007 | 2.03    | 2.07119 |
| chr11, mir-130a  | 1.98437 | 1.97    | 2.09253 | 2.03081 | 2.16954 | 2.12402 | 2.03276 | 2.1031  |
| chr11, mir-611   | 2.03205 | 1.9818  | 2.12538 | 2.00932 | 2.09915 | 2.0994  | 2.00906 | 2.06615 |
| chr11, mir-192,  | 2.01845 | 2.03328 | 2.12966 | 1.9581  | 2.17466 | 2.08897 | 1.94828 | 2.17552 |
| chr11, mir-612   | 1.98078 | 1.97597 | 2.13325 | 2.00792 | 2.16805 | 2.16156 | 2.06545 | 2.13545 |
| chr11, MALAT1    | 1.97082 | 1.99357 | 2.00255 | 1.98837 | 2.08378 | 2.18653 | 2.12316 | 2.06255 |
| chr11, mir-139   | 2.07277 | 2.02639 | 2.20627 | 1.98855 | 2.33289 | 2.06904 | 1.91494 | 2.23952 |
| chr11, mir-326   | 2.11125 | 2.02028 | 2.27667 | 1.98792 | 2.33917 | 2.07486 | 1.91403 | 2.26403 |
| chr11, PIWIL4    | 1.97678 | 2.02698 | 2.16526 | 2.16776 | 2.04559 | 2.09186 | 2.07017 | 1.95804 |
| chr11, mir-34b,  | 1.87397 | 1.91815 | 2.05445 | 2.04021 | 1.98144 | 3.5776  | 2.11438 | 2.91685 |
| chr11, mir-125b  | 1.95292 | 1.98714 | 2.12512 | 2.13137 | 2.03482 | 1.4     | 2.20107 | 2.02655 |
| chr11, let-7a-2, | 1.9645  | 1.97742 | 2.17181 | 2.13379 | 2.08434 | 1.40445 | 2.18011 | 2.11912 |
| chr12, mir-200c  | 2.24299 | 1.98794 | 1.70234 | 1.96523 | 2.14037 | 2.09094 | 1.9815  | 2.92271 |
| chr12, mir-613   | 2.16741 | 1.91741 | 1.59988 | 2.01333 | 2.09148 | 8.99098 | 2.06148 | 2.74778 |
| chr12, mir-614   | 2.21737 | 1.94219 | 1.6664  | 2.00974 | 2.15526 | 7.71859 | 2.02544 | 2.76798 |
| chr12, mir-196a  | 2.11991 | 1.91224 | 1.97654 | 1.93963 | 2.06308 | 1.97906 | 1.91579 | 2.72028 |
| chr12, mir-615   | 2.16328 | 2.0218  | 1.92123 | 1.97213 | 2.09836 | 2.03607 | 1.9568  | 2.94    |

|                 |         |         |         |         |         |         |         |         |
|-----------------|---------|---------|---------|---------|---------|---------|---------|---------|
| chr12, mir-148b | 2.10983 | 1.87059 | 1.96102 | 1.93    | 2.04873 | 2.04356 | 1.99263 | 2.82568 |
| chr12, mir-616  | 2.1502  | 1.90616 | 2.00394 | 1.94061 | 2.03808 | 2.02495 | 1.96737 | 2.63828 |
| chr12, mir-26a- | 2.14478 | 1.85522 | 2.03835 | 1.92565 | 2.0173  | 2.02983 | 1.95226 | 2.66991 |
| chr12, let-7i   | 2.15716 | 1.94056 | 2.45444 | 2.04747 | 1.88475 | 1.98062 | 1.96475 | 2.57574 |
| chr12, mir-548c | 2.14092 | 1.98092 | 2.3825  | 1.99367 | 2.01    | 2.06083 | 1.91617 | 2.62825 |
| chr12, mir-617  | 2.21321 | 1.97518 | 2.55598 | 2.14438 | 1.95905 | 2.09255 | 1.95971 | 2.81657 |
| chr12, mir-618  | 2.17752 | 1.98214 | 2.59883 | 2.15752 | 1.94    | 2.09221 | 1.99096 | 2.75359 |
| chr12, mir-492  | 2.21191 | 1.99676 | 1.69588 | 1.98897 | 2.09441 | 2.22691 | 1.94691 | 2.93691 |
| chr12, mir-331  | 2.15947 | 1.87397 | 1.47786 | 2.03374 | 1.93435 | 2.2842  | 2.04    | 2.82397 |
| chr12, mir-135a | 2.22933 | 1.97607 | 1.6674  | 2.16727 | 2.00887 | 2.1334  | 2.08313 | 2.74187 |
| chr12, mir-619  | 2.24603 | 1.95681 | 1.64474 | 1.99215 | 2.1456  | 2.21991 | 1.96224 | 2.98733 |
| chr12, mir-620  | 2.18322 | 1.94698 | 2.05429 | 2.0651  | 1.98383 | 2.2402  | 2.15423 | 2.67181 |
| chr12, PIWIL1   | 2.22185 | 1.95475 | 2.07143 | 2.09555 | 2.02147 | 2.15374 | 2.02034 | 2.74332 |
| chr12, RAN      | 2.16949 | 1.95397 | 2.04141 | 2.03269 | 2.04038 | 2.18013 | 2.01128 | 2.7232  |
| chr13, mir-621  | 1.98065 | 1.53903 | 1.92968 | 2.05387 | 2.0971  | 2.1371  | 2.10339 | 2.09935 |
| chr13, mir-16-1 | 1.89405 | 1.45132 | 1.75124 | 2.12405 | 1.94793 | 2.22041 | 2.30083 | 1.85843 |
| chr13, mir-622  | 1.86351 | 1.93153 | 1.83433 | 2.13973 | 1.85766 | 2.59721 | 2.05126 | 1.7291  |
| chr13, mir-17,  | 1.88007 | 1.92549 | 1.76827 | 2.06075 | 1.91278 | 2.74128 | 2.05383 | 2.61805 |
| chr13, mir-623  | 1.97707 | 1.96081 | 1.95616 | 2.0398  | 2.09758 | 2.84747 | 1.99131 | 2.0596  |
| chr14, mir-208  | 2.24826 | 1.98101 | 1.94147 | 2.02459 | 2.19266 | 2.08294 | 2.02174 | 2.17743 |
| chr14, mir-624  | 2.25738 | 1.98607 | 1.82238 | 2.12274 | 2.09941 | 2.18429 | 2.09512 | 2.00476 |
| chr14, mir-625  | 2.19885 | 1.94724 | 1.80897 | 2.09517 | 1.99138 | 2.20839 | 2.26494 | 2.02954 |
| chr14, Dicer1   | 2.25029 | 1.98111 | 1.88048 | 2.10375 | 2.0469  | 2.16235 | 2.13414 | 2.03906 |
| chr14, mir-342  | 2.25438 | 1.97927 | 1.97833 | 2.00531 | 2.15167 | 2.12281 | 2.0226  | 2.13615 |
| chr14, mir-345  | 2.18    | 2.00222 | 1.99778 | 1.96463 | 2.17778 | 2.08241 | 1.89648 | 2.11704 |
| chr14, mir-770, | 2.24097 | 2.00242 | 1.92923 | 2.05225 | 2.0993  | 2.04466 | 2.04188 | 2.04812 |
| chr14, mir-379, | 2.26809 | 1.95035 | 1.98204 | 2.04909 | 2.12248 | 2.01883 | 2.06391 | 2.06648 |
| chr14, mir-203  | 2.23088 | 2.05176 | 2.04353 | 1.95941 | 2.21824 | 1.94794 | 1.80912 | 2.07735 |
| chr15, mir-211  | 1.9901  | 1.97908 | 1.72643 | 2.06418 | 2.23735 | 2.1548  | 2.1352  | 2.1898  |
| chr15, mir-626  | 1.96318 | 1.97835 | 1.57035 | 2.09553 | 1.97212 | 2.21341 | 2.27035 | 1.99718 |
| chr15, mir-627  | 1.9652  | 1.99112 | 1.60827 | 2.09949 | 2.06775 | 2.20184 | 2.20245 | 2.05776 |
| chr15, mir-628  | 1.97606 | 2.02167 | 1.6128  | 2.14485 | 2.04742 | 2.26538 | 2.20765 | 1.96773 |
| chr15, mir-190  | 2.04089 | 2.00326 | 1.69215 | 2.10496 | 2.13326 | 2.12904 | 2.13363 | 2.08222 |
| chr15, mir-422a | 2.02122 | 2.00489 | 1.76356 | 2.02289 | 2.20055 | 2.17656 | 2.07078 | 2.139   |
| chr15, mir-629  | 2.07496 | 2.02224 | 1.7892  | 2.06904 | 2.21304 | 2.20112 | 1.90072 | 2.14392 |
| chr15, mir-630  | 1.9847  | 1.9653  | 1.65017 | 2.16904 | 2.06331 | 2.19496 | 2.14643 | 2.0533  |
| chr15, mir-631  | 2.0538  | 2.03354 | 1.76392 | 2.02    | 2.20101 | 2.11253 | 2.00063 | 2.21798 |

|                 |         |         |         |         |         |         |         |         |
|-----------------|---------|---------|---------|---------|---------|---------|---------|---------|
| chr15, mir-184  | 2.00902 | 2.01964 | 1.78714 | 2.08625 | 2.22429 | 2.16295 | 2.10339 | 2.16759 |
| chr15, mir-549  | 2.07153 | 2.05396 | 1.78712 | 2.13027 | 2.24523 | 2.11739 | 2.08225 | 2.11333 |
| chr15, mir-7-2  | 2.00929 | 2.03524 | 1.68726 | 2.10131 | 2.16941 | 2.1525  | 2.08583 | 2.06036 |
| chr15, mir-9-3  | 2.05745 | 2.0201  | 1.75745 | 2.02673 | 2.20245 | 2.11888 | 2.03878 | 2.12929 |
| chr16, mir-662  | 1.99769 | 2.18462 | 1.98846 | 1.94462 | 2.19692 | 2.045   | 1.89654 | 2.06    |
| chr16, mir-193b | 2.00196 | 2.22967 | 1.91641 | 2.00337 | 2.17663 | 2.19054 | 2.065   | 2.18456 |
| chr16, mir-484  | 1.95287 | 2.28113 | 1.85017 | 2.03357 | 2.05217 | 2.19635 | 2.07252 | 2.07809 |
| chr16, mir-138- | 1.99417 | 1.60722 | 1.95417 | 1.99722 | 2.72    | 2.13769 | 2.04028 | 2.10611 |
| chr16, mir-328  | 2.01908 | 1.98714 | 2.03367 | 1.95357 | 2.64602 | 2.06122 | 1.93367 | 2.11459 |
| chr16, mir-140  | 1.99415 | 1.93293 | 1.89098 | 1.97951 | 2.79012 | 2.12768 | 2.00281 | 2.05927 |
| chr16, mir-768  | 1.91125 | 1.94665 | 1.77888 | 2.01329 | 2.85967 | 2.19454 | 2.10395 | 2.03842 |
| chr17, mir-22   | 2.10853 | 2.10147 | 1.57747 | 2.028   | 1.59707 | 1.62573 | 2.03147 | 2.22587 |
| chr17, mir-132, | 2.06429 | 2.09397 | 1.60714 | 2.04206 | 1.5173  | 1.61222 | 2.04365 | 2.15841 |
| chr17, mir-195, | 2.07942 | 2.09437 | 1.59951 | 2.09136 | 2.24816 | 1.60932 | 2.08049 | 2.17408 |
| chr17, mir-324  | 2.12705 | 2.11795 | 1.54723 | 2.06188 | 2.29438 | 1.59241 | 2.01232 | 2.28607 |
| chr17, mir-33b  | 2.08667 | 2.09528 | 1.83444 | 1.98806 | 2.27444 | 1.67167 | 1.92375 | 2.18889 |
| chr17, mir-451, | 2.01352 | 1.96074 | 2.31389 | 1.96593 | 2.15056 | 2.15278 | 2.03    | 2.17926 |
| chr17, mir-423  | 1.92431 | 1.95895 | 2.30895 | 2.04832 | 2.01537 | 2.17379 | 2.16842 | 2.054   |
| chr17, mir-193a | 2.00387 | 2.00718 | 2.39298 | 1.99468 | 2.21    | 2.13653 | 2.04226 | 2.20532 |
| chr17, mir-632  | 1.93566 | 1.97    | 2.32779 | 2.06991 | 2.00717 | 2.21425 | 2.22345 | 2.03814 |
| chr17, mir-152  | 2.00139 | 2.02574 | 2.34445 | 1.99519 | 2.20778 | 2.13908 | 2.02778 | 2.19083 |
| chr17, mir-10a  | 2.01424 | 2.09246 | 2.30229 | 2.04144 | 2.17661 | 2.09559 | 1.99746 | 2.14619 |
| chr17, mir-196a | 2.02696 | 1.97226 | 2.33461 | 2.00108 | 2.20627 | 2.09324 | 2.02343 | 2.08422 |
| chr17, mir-142  | 2.10183 | 2.03963 | 2.01476 | 2.02707 | 2.21463 | 2.07622 | 1.94829 | 2.15488 |
| chr17, mir-454, | 1.94459 | 1.97341 | 1.83022 | 2.08304 | 2.04674 | 2.17319 | 2.1783  | 1.98941 |
| chr17, mir-21   | 1.94936 | 1.95092 | 2.19789 | 2.05697 | 2.07633 | 2.14495 | 2.15661 | 2.08275 |
| chr17, mir-633  | 1.97423 | 1.96833 | 2.04731 | 2.10167 | 2.04615 | 2.06641 | 2.1391  | 1.99231 |
| chr17, mir-634  | 2.01134 | 1.98891 | 2.16109 | 2.07353 | 2.06277 | 2.11395 | 2.08193 | 2.0763  |
| chr17, mir-548c | 1.95888 | 1.93966 | 2.13079 | 2.04652 | 2.10124 | 2.17449 | 2.13348 | 2.10393 |
| chr17, mir-635  | 1.97943 | 1.96747 | 2.15529 | 2.03632 | 2.11701 | 2.14747 | 2.06034 | 2.13299 |
| chr17, mir-636  | 1.94478 | 2.01089 | 2.11425 | 2.02124 | 2.02425 | 2.15646 | 2.12425 | 2.08743 |
| chr17, mir-657, | 2.05634 | 2.09707 | 2.0239  | 1.97073 | 2.19756 | 2.04268 | 1.94561 | 2.05488 |
| chr18, mir-133a | 1.89965 | 1.92882 | 1.7675  | 2.09278 | 2.56958 | 2.09403 | 2.12021 | 1.93146 |
| chr18, mir-187  | 1.97797 | 1.95754 | 1.91609 | 2.0671  | 2.68464 | 2.07232 | 2.00841 | 2.04319 |
| chr18, mir-122a | 1.9456  | 1.6615  | 1.8659  | 2.0553  | 2.7786  | 2.129   | 2.0953  | 2.1068  |
| chr19, mir-637  | 2.04923 | 2.39077 | 2.05154 | 1.97462 | 2.18359 | 2.08615 | 1.94128 | 2.1459  |
| chr19, mir-7-3  | 2.0178  | 2.3362  | 2.2032  | 1.9992  | 2.227   | 2.1128  | 1.9968  | 2.2318  |

|                 |         |         |         |         |         |         |         |         |
|-----------------|---------|---------|---------|---------|---------|---------|---------|---------|
| chr19, mir-638  | 1.98689 | 2.03044 | 2.07444 | 1.96156 | 2.17889 | 2.134   | 2.04    | 2.15133 |
| chr19, mir-199a | 2.07275 | 2.00353 | 2.12373 | 1.97137 | 2.21196 | 2.10216 | 1.96882 | 2.19745 |
| chr19, mir-24-2 | 2.01673 | 2.04154 | 2.11519 | 1.98038 | 2.15846 | 2.09962 | 1.98904 | 2.15327 |
| chr19, mir-181c | 2.04727 | 2.03036 | 2.13436 | 1.99054 | 2.30527 | 2.096   | 1.94    | 2.23582 |
| chr19, mir-639  | 2       | 2.0248  | 2.11613 | 2.004   | 2.176   | 2.1648  | 2.04347 | 2.14813 |
| chr19, mir-640  | 2.02163 | 1.98827 | 2.13058 | 2.01683 | 2.17769 | 2.1626  | 2.04856 | 2.18154 |
| chr19, mir-641  | 2.04455 | 2.04055 | 2.13654 | 1.99727 | 2.17364 | 2.09309 | 1.95764 | 2.17345 |
| chr19, mir-330  | 2.04735 | 2.03163 | 2.15388 | 1.98143 | 2.21959 | 2.1102  | 1.95755 | 2.17612 |
| chr19, mir-642  | 2.01132 | 1.99094 | 2.08    | 1.97811 | 2.24472 | 2.13774 | 1.97057 | 2.14491 |
| chr19, mir-769  | 2.03368 | 2.02193 | 2.13649 | 1.9879  | 2.25807 | 2.10298 | 1.97123 | 2.15632 |
| chr19, mir-150  | 2.02254 | 2.02968 | 2.08571 | 1.99286 | 2.85064 | 2.13159 | 1.9654  | 2.18238 |
| chr19, mir-99b  | 2.03371 | 2.03914 | 2.21086 | 2.03814 | 2.96243 | 2.08857 | 1.95557 | 2.19114 |
| chr19, mir-643  | 2.00304 | 2.06215 | 2.04797 | 2.10608 | 2.99924 | 2.13722 | 2.07101 | 2.08506 |
| chr19, mir-512- | 2.01077 | 1.99134 | 2.16279 | 2.04727 | 2.90799 | 2.07582 | 1.93655 | 2.14526 |
| chr20, mir-103- | 1.93957 | 1.93291 | 2.50248 | 2.01675 | 2.03692 | 2.12496 | 2.05299 | 1.99821 |
| chr20, mir-663  | 1.97    | 2.00462 | 2.30385 | 2.21115 | 2.01615 | 1.95269 | 2.06654 | 1.91115 |
| chr20, mir-644  | 1.85648 | 1.8988  | 2.36917 | 1.97861 | 1.92861 | 2.13315 | 2.12806 | 1.94269 |
| chr20, mir-499  | 1.98707 | 1.93787 | 2.5132  | 1.94613 | 2.1632  | 2.01013 | 1.93413 | 2.13173 |
| chr20, mir-645  | 2.17    | 1.92037 | 2.43467 | 1.97879 | 1.30318 | 2.10692 | 1.98299 | 2.04355 |
| chr20, mir-296  | 2.2319  | 1.97084 | 2.49547 | 2.01221 | 1.32926 | 2.06821 | 1.97179 | 2.16074 |
| chr20, mir-646  | 2.30214 | 1.98112 | 2.49684 | 2.09969 | 1.29888 | 2.0198  | 1.97041 | 1.94969 |
| chr20, mir-1-1, | 2.13109 | 1.98406 | 2.27109 | 1.92375 | 2.17359 | 2.00922 | 1.88141 | 2.12687 |
| chr20, mir-124a | 2.17482 | 1.98339 | 2.39821 | 1.95    | 2.15304 | 2.00464 | 1.88839 | 2.12429 |
| chr20, mir-647  | 2.14173 | 1.94519 | 2.26404 | 1.91154 | 2.0675  | 2.08519 | 1.96462 | 2.09442 |
| chr21, mir-99a, | 2.01535 | 2.04884 | 1.8638  | 2.20496 | 2.07884 | 2.03403 | 2.03108 | 1.88388 |
| chr21, mir-125b | 1.98401 | 2.01012 | 1.865   | 2.20469 | 1.96679 | 2.04506 | 2.03506 | 1.8429  |
| chr21, mir-155  | 1.9509  | 1.99393 | 1.88793 | 2.12772 | 2.09152 | 2.08807 | 2.22931 | 1.91697 |
| chr21, mir-802  | 1.95274 | 1.95387 | 1.90153 | 2.12823 | 2.10129 | 2.05169 | 2.06903 | 2.01363 |
| chr22, mir-648  | 2.03919 | 1.98365 | 1.90676 | 2.01486 | 2.1873  | 2.15865 | 2.0473  | 2.18284 |
| chr22, mir-185  | 2.01571 | 2.01543 | 1.98029 | 1.97986 | 2.16886 | 2.07957 | 1.95543 | 2.15971 |
| chr22, DGCR8-   | 2.01866 | 2.0008  | 1.94455 | 1.98429 | 2.09518 | 2.08384 | 1.95518 | 2.09027 |
| chr22, mir-649  | 2.02    | 2.04702 | 1.9817  | 1.96702 | 2.13298 | 2.0117  | 1.95872 | 2.12596 |
| chr22, mir-130b | 2.01298 | 2.03947 | 1.96404 | 2.02088 | 2.20526 | 2.18561 | 1.9914  | 2.21526 |
| chr22, mir-650  | 2.31256 | 2.26833 | 2.2132  | 2.18628 | 2.10897 | 2.46897 | 2.32077 | 2.51282 |
| chr22, PIWIL3   | 1.95389 | 1.95474 | 1.87687 | 2.03962 | 2.07654 | 2.15446 | 2.1536  | 2.10545 |
| chr22, mir-658, | 2.03683 | 2.01519 | 1.94215 | 1.99861 | 2.23671 | 2.14481 | 2.01494 | 2.21013 |
| chr22, mir-33   | 2.04569 | 1.99958 | 1.93764 | 2.04764 | 2.16958 | 2.15389 | 2.02361 | 2.10389 |



|                   |         |          |         |          |         |         |          |         |
|-------------------|---------|----------|---------|----------|---------|---------|----------|---------|
| chr22, let-7a-3,  | 2.08863 | 2.1098   | 2.02471 | 1.98863  | 2.27353 | 2.03765 | 1.81882  | 2.21725 |
| chrX, mir-651     | 1.24328 | 0.986    | 2.6212  | 1.04864  | 2.05464 | 1.95896 | 0.97304  | 1.23792 |
| chrX, mir-221,    | 1.22972 | 0.994717 | 2.59604 | 1.03792  | 2.03142 | 1.99132 | 0.97434  | 5.32236 |
| chrX, mir-532,    | 1.19658 | 0.976491 | 2.53017 | 1.03     | 2.01816 | 1.94298 | 0.950527 | 4.98491 |
| chrX, mir-98, let | 1.21568 | 0.971871 | 2.59403 | 0.999496 | 2.07655 | 1.97612 | 0.923742 | 4.60115 |
| chrX, mir-223     | 1.25008 | 0.998125 | 2.67609 | 1.05992  | 2.0918  | 1.97727 | 0.930235 | 1.16742 |
| chrX, mir-421     | 1.25153 | 0.994694 | 2.6102  | 1.08061  | 2.02541 | 2.01592 | 0.954285 | 1.155   |
| chrX, mir-545,    | 1.26155 | 1.01285  | 2.54797 | 1.04171  | 2.02049 | 1.99366 | 0.958699 | 1.12894 |
| chrX, mir-384     | 1.23214 | 0.989107 | 2.49036 | 1.07196  | 1.95018 | 1.96929 | 0.94375  | 1.09768 |
| chrX, mir-325     | 1.24    | 0.963636 | 2.56364 | 1.06977  | 1.92364 | 1.91568 | 0.953864 | 1.08818 |
| chrX, mir-361     | 1.23333 | 0.983764 | 2.51151 | 1.09258  | 1.94301 | 1.97086 | 0.982151 | 1.04763 |
| chrX, mir-652     | 1.23112 | 0.973645 | 2.57664 | 1.05093  | 2.03953 | 2.05879 | 0.959813 | 1.11103 |
| chrX, mir-448     | 1.26375 | 0.98925  | 2.52525 | 1.09238  | 1.89612 | 1.95612 | 0.98875  | 1.03138 |
| chrX, mir-766     | 1.19348 | 0.966087 | 2.5125  | 0.981196 | 2.17348 | 2.12663 | 0.919891 | 1.32728 |
| chrX, mir-220     | 1.20146 | 0.963415 | 2.44463 | 1.04098  | 1.95537 | 2.01146 | 0.937073 | 1.12805 |
| chrX, mir-363,    | 1.213   | 0.946    | 2.48092 | 1.01515  | 1.88231 | 1.99962 | 0.923154 | 1.09946 |
| chrX, mir-450-1   | 1.19348 | 0.978106 | 2.44523 | 0.987576 | 1.97871 | 1.97758 | 0.908788 | 1.18901 |
| chrX, mir-504     | 1.23546 | 0.973615 | 2.60539 | 1.09169  | 1.93315 | 1.96792 | 0.963385 | 1.00538 |
| chrX, mir-505     | 1.2333  | 0.961319 | 2.48517 | 1.04582  | 1.95077 | 2.0067  | 0.914066 | 1.0433  |
| chrX, mir-513-1   | 1.25794 | 0.990567 | 2.56593 | 1.0734   | 1.99449 | 1.95036 | 0.936289 | 1.07082 |
| chrX, FMR1        | 1.21929 | 0.955603 | 2.59993 | 1.03805  | 1.85585 | 2.01298 | 0.937305 | 1.09649 |
| chrX, mir-224,    | 1.27008 | 1.00403  | 2.62395 | 1.04016  | 2.11876 | 1.95674 | 0.909147 | 1.20488 |
| chrX, mir-105-1   | 1.26289 | 0.984556 | 2.77233 | 1.06167  | 2.04889 | 1.98678 | 0.965778 | 1.108   |

| TUMOR ID         | 4236    | 4450    | 4522    | 5028    | 5081    | 5186    | 5485    | 5782    |
|------------------|---------|---------|---------|---------|---------|---------|---------|---------|
| MiRNA ID         |         |         |         |         |         |         |         |         |
| chr1, mir-200b,  | 2.40674 | 2.46093 | 1.95907 | 2.21233 | 2.06628 | 1.97093 | 1.95581 | 1.95814 |
| chr1, mir-551a   | 2.37355 | 2.51645 | 2.12129 | 2.25903 | 2.03645 | 1.99129 | 1.97871 | 2.01516 |
| chr1, mir-34a    | 2.22173 | 2.33387 | 1.658   | 2.2112  | 2.18813 | 1.99613 | 1.96947 | 1.90813 |
| chr1, mir-801    | 2.12071 | 2.24262 | 1.61667 | 2.2219  | 2.29571 | 2.01786 | 1.92881 | 2.0069  |
| chr1, mir-552    | 2.26195 | 2.40896 | 1.65805 | 2.19494 | 2.09364 | 1.99    | 2.0174  | 2.06039 |
| chr1, AGO4, A    | 1.9681  | 2.0662  | 1.54034 | 2.16033 | 2.20506 | 1.9939  | 1.9374  | 1.99876 |
| chr1, mir-30e, l | 2.09294 | 2.19853 | 1.59846 | 2.18897 | 2.13382 | 2.02103 | 1.93919 | 2.01971 |
| chr1, mir-101-1  | 2.01111 | 2.15127 | 1.64087 | 1.55103 | 2.19095 | 2.05762 | 1.98595 | 2.03889 |
| chr1, SERBP1     | 1.99772 | 2.86152 | 1.54353 | 2.0831  | 2.10049 | 2.03315 | 2.00696 | 2.02821 |
| chr1, mir-186    | 1.91    | 1.98644 | 1.61054 | 1.46893 | 1.99973 | 1.86114 | 2.08322 | 2.11443 |

|                 |         |          |         |         |         |         |         |         |
|-----------------|---------|----------|---------|---------|---------|---------|---------|---------|
| chr1, mir-137   | 1.86926 | 1.95108  | 1.58159 | 2.05131 | 2.02108 | 2.1258  | 2.07301 | 2.11688 |
| chr1, mir-553   | 1.99088 | 2.08064  | 1.58592 | 2.08232 | 2.1536  | 2.05056 | 1.99344 | 2.01424 |
| chr1, mir-197   | 2.00248 | 2.07894  | 1.58929 | 2.11894 | 2.19298 | 2.04092 | 1.94738 | 2.00574 |
| chr1, DDX20     | 2.03314 | 2.15346  | 1.64141 | 2.11368 | 2.17924 | 2.012   | 1.97357 | 2.01886 |
| chr1, mir-554   | 2.10536 | 2.13298  | 2.65726 | 3.10643 | 2.09345 | 1.90702 | 1.87857 | 1.95429 |
| chr1, mir-92b   | 2.39898 | 1.99722  | 2.61916 | 3.23028 | 2.13972 | 1.87713 | 1.9037  | 1.9638  |
| chr1, mir-555   | 2.0125  | 1.32438  | 2.67732 | 3.31786 | 2.14455 | 1.91464 | 1.86    | 1.90911 |
| chr1, mir-9-1   | 2.15732 | 1.5511   | 2.71284 | 3.31969 | 2.1463  | 1.90819 | 1.87701 | 1.91992 |
| chr1, mir-765   | 2.19568 | 1.66955  | 2.76063 | 3.15658 | 2.05297 | 1.89964 | 1.92396 | 1.96577 |
| chr1, mir-556   | 2.00788 | 1.35452  | 2.71248 | 3.25518 | 1.96204 | 1.94299 | 1.92847 | 1.9619  |
| chr1, mir-557   | 2.56079 | 1.34441  | 2.70331 | 3.07969 | 1.99212 | 1.93921 | 1.92055 | 1.95575 |
| chr1, mir-214,  | 2.5698  | 1.17626  | 2.73349 | 3.33046 | 1.9159  | 1.95928 | 1.93318 | 1.94349 |
| chr1, mir-488   | 2.65092 | 1.35035  | 2.82461 | 3.17851 | 1.87801 | 1.98886 | 2.00716 | 2.01716 |
| chr1, mir-181b- | 2.49736 | 1.13588  | 3.59595 | 1.96878 | 1.97432 | 1.96541 | 1.92514 | 1.95743 |
| chr1, mir-135b  | 2.88388 | 2.43908  | 3.5252  | 1.68847 | 2.19408 | 1.9152  | 1.94112 | 1.98306 |
| chr1, mir-29c,  | 2.79894 | 2.22862  | 3.68175 | 1.56525 | 2.08519 | 1.9715  | 1.72675 | 2.00844 |
| chr1, mir-205   | 2.82606 | 2.28899  | 3.74642 | 2.19101 | 1.92147 | 2.00881 | 2.02275 | 2.04881 |
| chr1, mir-215,  | 2.40279 | 1.9427   | 2.77902 | 2.00943 | 1.98156 | 1.67107 | 1.96541 | 2.02066 |
| chr2, mir-558   | 2.58109 | 1.95418  | 1.90273 | 2.608   | 2.087   | 2.00954 | 1.93318 | 1.99118 |
| chr2, mir-559   | 2.71883 | 2.1383   | 1.92734 | 2.76192 | 2.19085 | 1.97553 | 1.93957 | 1.96798 |
| chr2, mir-217,  | 2.68746 | 2.07642  | 1.95    | 2.72888 | 1.97493 | 2.01761 | 1.97127 | 2.00821 |
| chr2, mir-560   | 2.14889 | 1.84333  | 1.56222 | 2.17667 | 2.13444 | 2.06556 | 1.90889 | 2.36222 |
| chr2, mir-128a  | 1.87368 | 1.95707  | 1.96774 | 2.0382  | 2.15917 | 2.04669 | 1.9594  | 2.01436 |
| chr2, mir-10b   | 2.11958 | 1.44815  | 2.04143 | 1.6084  | 1.98664 | 2.0405  | 2.04504 | 2.07698 |
| chr2, mir-561   | 1.90561 | 1.20856  | 2.02532 | 2.06029 | 1.92194 | 2.18755 | 2.10101 | 2.13734 |
| chr2, mir-26b   | 2.24678 | 2.39017  | 2.13542 | 2.20966 | 2.15068 | 1.95475 | 1.93475 | 2.01475 |
| chr2, mir-375   | 2.35527 | 2.56032  | 2.10161 | 2.33226 | 2.1057  | 1.9443  | 1.9514  | 2.0257  |
| chr2, mir-153-1 | 2.31167 | 2.55923  | 2.11103 | 2.28256 | 2.15577 | 1.93551 | 1.96205 | 2.03077 |
| chr2, mir-562   | 1.9825  | 0.460667 | 1.954   | 2.096   | 2.09733 | 2.0215  | 1.963   | 2.01617 |
| chr2, mir-149   | 2.2645  | 2.35575  | 1.84175 | 2.117   | 2.008   | 1.9405  | 1.98075 | 2.04525 |
| chr3, mir-563   | 1.98333 | 2.02254  | 1.5719  | 2.10635 | 2.08222 | 2.3346  | 1.97079 | 1.97635 |
| chr3, mir-128b  | 1.93555 | 2.01665  | 1.59646 | 2.07732 | 2.07    | 2.44836 | 2.0661  | 2.07652 |
| chr3, mir-26a-1 | 1.95508 | 2.05298  | 1.63226 | 2.09089 | 2.08016 | 2.36621 | 1.97871 | 2.01863 |
| chr3, mir-138-1 | 2.26651 | 2.32778  | 1.65103 | 2.18444 | 2.08889 | 2.35706 | 2.02722 | 2.07222 |
| chr3, mir-564   | 2.07402 | 2.17783  | 1.63228 | 2.1575  | 2.12815 | 2.37685 | 2.01685 | 2.05489 |
| chr3, mir-565   | 1.98258 | 2.09895  | 1.57314 | 2.10468 | 2.15742 | 2.3854  | 1.98839 | 2.02943 |
| chr3, mir-425,  | 2.2896  | 2.44444  | 1.69374 | 2.25899 | 2.22313 | 2.30849 | 2.00141 | 2.07444 |

|                  |         |         |         |         |         |         |         |         |
|------------------|---------|---------|---------|---------|---------|---------|---------|---------|
| chr3, mir-566    | 2.07085 | 2.14966 | 1.78864 | 1.69966 | 2.1639  | 2.22949 | 1.95746 | 2.04322 |
| chr3, let-7g, mi | 2.15945 | 2.30923 | 1.71387 | 1.64646 | 2.21365 | 2.29536 | 1.95282 | 2.02061 |
| chr3, mir-567    | 1.9792  | 2.1035  | 1.61861 | 2.1373  | 2.11423 | 2.41    | 1.97599 | 2.04854 |
| chr3, mir-568    | 2.06764 | 2.19147 | 1.59166 | 2.18656 | 2.06631 | 2.38567 | 1.9765  | 2.01242 |
| chr3, mir-198    | 2.01352 | 2.16368 | 2.40312 | 2.12304 | 2.02768 | 2.37304 | 1.9852  | 2.03072 |
| chr3, mir-15b, l | 1.87007 | 1.17286 | 2.36656 | 2.07026 | 2.02214 | 2.40604 | 1.94227 | 1.98351 |
| chr3, mir-551b   | 1.77437 | 1.83078 | 1.9668  | 2.03165 | 1.90029 | 2.43961 | 1.9999  | 2.04097 |
| chr3, mir-569    | 1.90918 | 1.97882 | 1.99296 | 2.03919 | 1.92415 | 2.37652 | 1.99615 | 2.00859 |
| chr3, mir-28     | 1.9216  | 2.09876 | 1.98834 | 1.47047 | 2.10089 | 2.34603 | 1.92929 | 1.98598 |
| chr3, mir-570    | 2.06684 | 2.55158 | 1.95158 | 1.88105 | 2.37053 | 2.79    | 1.14974 | 2.06763 |
| chr4, mir-571    | 1.91294 | 1.24176 | 1.58412 | 2.01824 | 2.03529 | 1.73353 | 2.04882 | 2.08588 |
| chr4, mir-95     | 2.19914 | 1.53443 | 1.74072 | 2.243   | 2.14114 | 1.74614 | 2.04629 | 2.08586 |
| chr4, mir-572    | 2.21076 | 1.34051 | 1.67051 | 2.26063 | 2.01886 | 2.11392 | 2.1219  | 2.13152 |
| chr4, mir-218-1  | 1.89664 | 1.2011  | 1.63484 | 2.09303 | 1.97355 | 2.19974 | 2.11993 | 2.19355 |
| chr4, mir-573    | 2.0463  | 1.28197 | 1.62677 | 2.11803 | 2.09142 | 2.12071 | 2.07787 | 2.10646 |
| chr4, mir-574    | 2.03727 | 1.34131 | 1.58343 | 2.14727 | 2.27253 | 1.9998  | 1.94758 | 1.98848 |
| chr4, mir-575    | 2.16524 | 1.52534 | 1.63573 | 2.22961 | 2.17243 | 1.72563 | 2.00369 | 2.04544 |
| chr4, mir-576    | 1.92638 | 1.24707 | 1.55612 | 2.01767 | 2.11233 | 2.06474 | 2.02146 | 2.05603 |
| chr4, mir-367, l | 1.89735 | 1.2475  | 1.55439 | 2.12136 | 2.09546 | 2.06629 | 2.00348 | 2.02341 |
| chr4, mir-577    | 1.91934 | 1.22223 | 1.57422 | 2.07157 | 2.0197  | 2.12295 | 2.03807 | 2.11048 |
| chr4, mir-578    | 1.90921 | 1.23111 | 1.57968 | 1.4723  | 2.06524 | 2.10825 | 2.06    | 2.08381 |
| chr5, Droscha    | 1.9317  | 2.01909 | 1.92198 | 2.13695 | 1.95996 | 1.99338 | 2.4952  | 1.99569 |
| chr5, mir-579    | 1.80102 | 1.89408 | 1.85728 | 1.9968  | 2.07646 | 1.97041 | 2.43748 | 1.91891 |
| chr5, mir-580    | 1.8716  | 1.96072 | 1.91496 | 2.01424 | 1.98704 | 1.9856  | 2.48768 | 1.97552 |
| chr5, mir-581    | 1.86724 | 1.98657 | 1.93328 | 2.12022 | 2.05634 | 2.05105 | 2.56851 | 2.01299 |
| chr5, mir-449, l | 1.89978 | 2.02514 | 1.97116 | 2.14    | 2.03319 | 2.0058  | 2.48304 | 1.96848 |
| chr5, mir-582    | 1.99933 | 1.93042 | 2.048   | 2.14633 | 2.003   | 2.03125 | 2.55508 | 1.9955  |
| chr5, mir-9-2    | 1.919   | 2.06644 | 1.98156 | 2.161   | 1.98744 | 2.02344 | 2.538   | 2.01806 |
| chr5, mir-583    | 1.9485  | 2.01526 | 1.97782 | 2.14    | 1.95414 | 2.0115  | 2.49436 | 1.9988  |
| chr5, mir-584    | 2.14205 | 2.29687 | 1.98807 | 1.57952 | 1.99807 | 1.65578 | 2.46241 | 1.99494 |
| chr5, mir-143, l | 2.24713 | 2.42158 | 2.04871 | 1.63911 | 2.14554 | 1.64604 | 2.43931 | 1.99376 |
| chr5, mir-378    | 2.05916 | 2.12229 | 2.01229 | 1.57265 | 2.18964 | 1.67602 | 2.39253 | 1.97361 |
| chr5, mir-146a   | 1.9999  | 2.15606 | 1.98869 | 1.55222 | 2.03434 | 1.98333 | 2.48939 | 2.00838 |
| chr5, mir-103-1  | 1.90841 | 1.96735 | 2.35773 | 2.11432 | 2.03598 | 2.02947 | 2.52114 | 2.00227 |
| chr5, mir-218-2  | 2.02888 | 2.06776 | 2.39897 | 2.11963 | 1.98738 | 2.00944 | 2.48439 | 2.02383 |
| chr5, mir-585    | 2.08654 | 2.16709 | 2.38955 | 2.18491 | 2.00282 | 1.98664 | 2.49691 | 2.021   |
| chr5, mir-340    | 1.97043 | 2.05376 | 2.31817 | 2.13763 | 2.02688 | 1.96258 | 2.43731 | 1.96097 |

|                  |         |         |         |         |         |         |         |         |
|------------------|---------|---------|---------|---------|---------|---------|---------|---------|
| chr6, mir-548a-  | 1.97138 | 2.09658 | 2.00114 | 2.06585 | 2.12911 | 2.00748 | 1.96114 | 1.97789 |
| chr6, mir-219-1  | 2.36227 | 2.60062 | 2.04959 | 2.30351 | 2.15412 | 1.92948 | 1.9399  | 2.06567 |
| chr6, XPO5       | 2.08256 | 2.19599 | 1.56314 | 2.13554 | 2.14349 | 1.92516 | 1.91641 | 1.97048 |
| chr6, mir-586    | 1.84276 | 1.82948 | 1.51905 | 1.75345 | 1.93526 | 2.04741 | 1.99121 | 2.01155 |
| chr6, mir-206, l | 2.02424 | 2.05971 | 1.5954  | 2.06453 | 2.10475 | 1.96086 | 1.93137 | 1.9713  |
| chr6, mir-30c-2  | 1.92591 | 2.03591 | 1.6172  | 1.68504 | 1.98201 | 2.08682 | 2.06061 | 2.08424 |
| chr6, mir-587    | 2.26636 | 1.60291 | 1.66136 | 1.85727 | 2.25727 | 2.05591 | 2.02336 | 2.07745 |
| chr6, mir-548b   | 2.05593 | 1.34071 | 1.62611 | 1.72682 | 2.13982 | 2.11673 | 2.07274 | 2.0954  |
| chr6, mir-588    | 1.82148 | 1.16885 | 1.59295 | 1.61885 | 2.03311 | 2.16934 | 2.06361 | 2.1318  |
| chr6, mir-548a-  | 2.04228 | 1.40984 | 1.64874 | 1.76504 | 2.19197 | 2.1122  | 2.04858 | 2.08874 |
| chr7, mir-339    | 2.26316 | 2.38026 | 2.02342 | 2.13079 | 1.98079 | 1.97368 | 1.84553 | 2.13632 |
| chr7, mir-589    | 2.18392 | 2.3198  | 2.06078 | 2.18922 | 2.07431 | 2.06843 | 1.82804 | 2.15529 |
| chr7, mir-148a   | 1.95448 | 2.08688 | 1.93229 | 2.0774  | 1.99302 | 2.2226  | 1.85438 | 1.90698 |
| chr7, mir-196b   | 2.08417 | 2.13979 | 1.93344 | 2.1249  | 2.02073 | 2.22333 | 1.90448 | 1.94177 |
| chr7, mir-550-1  | 1.85901 | 1.97259 | 1.91494 | 1.97284 | 2.08778 | 2.2358  | 1.86766 | 1.90568 |
| chr7, has-mir-5  | 1.82000 | 2.11000 | 1.96000 | 1.90000 | 2.01000 | 2.24000 | 1.85000 | 1.93000 |
| chr7, mir-590    | 1.83742 | 1.94108 | 1.8128  | 2.00742 | 2.10839 | 2.18892 | 1.79237 | 1.86892 |
| chr7, mir-653, l | 1.76069 | 1.86312 | 1.864   | 1.96237 | 1.82062 | 2.27156 | 1.87306 | 1.90412 |
| chr7, mir-591    | 1.82312 | 2.0248  | 1.9224  | 1.96584 | 1.85104 | 2.29152 | 1.92248 | 1.95272 |
| chr7, mir-25, m  | 2.19336 | 2.39089 | 1.9008  | 2.18071 | 2.06115 | 2.02487 | 1.79504 | 1.85823 |
| chr7, mir-592    | 1.901   | 1.97592 | 1.52008 | 1.99731 | 1.90962 | 2.30531 | 1.92123 | 1.95623 |
| chr7, SDN1, m    | 1.92886 | 2.0157  | 1.5276  | 2.02863 | 2.00173 | 2.22986 | 1.87842 | 1.93191 |
| chr7, mir-129-1  | 2.06483 | 2.19135 | 1.59831 | 2.09595 | 2.07865 | 2.18101 | 1.87292 | 1.92146 |
| chr7, mir-182, l | 2.10616 | 2.24111 | 1.65697 | 2.10424 | 2.04768 | 2.15939 | 1.85929 | 1.94889 |
| chr7, mir-335    | 1.96258 | 2.06727 | 1.49492 | 2.04727 | 1.97625 | 2.23898 | 1.85922 | 1.91609 |
| chr7, mir-29a, l | 1.93674 | 2.03811 | 1.52105 | 1.478   | 2.02842 | 2.23358 | 1.88737 | 1.92474 |
| chr7, mir-490    | 1.72858 | 2.44615 | 1.49142 | 1.93059 | 1.80964 | 2.32213 | 1.95444 | 1.98752 |
| chr7, has-mir-5  | 1.96655 | 2.0181  | 1.49941 | 2.03428 | 2.01905 | 2.22917 | 1.87226 | 1.94345 |
| chr7, mir-671    | 2.13365 | 2.29837 | 1.71019 | 2.1226  | 2.01192 | 2.11269 | 1.86    | 1.91317 |
| chr7, mir-153-2  | 2.03965 | 2.13593 | 1.56907 | 2.09453 | 1.97639 | 2.20058 | 1.89151 | 1.91477 |
| chr7, mir-595    | 2.08494 | 2.30938 | 1.64185 | 2.12346 | 1.97852 | 2.19432 | 1.87062 | 1.93198 |
| chr8, mir-596    | 2.1171  | 2.25101 | 2.07145 | 1.6129  | 2.03855 | 2.08087 | 2.13971 | 2.1471  |
| chr8, mir-597    | 2.02234 | 2.10393 | 2.06407 | 2.13138 | 2.07366 | 2.10234 | 2.05179 | 2.08883 |
| chr8, mir-124a-  | 2.20152 | 2.26518 | 2.12009 | 2.18661 | 2.04768 | 2.02705 | 2.03821 | 2.06973 |
| chr8, mir-598    | 2.25759 | 2.51805 | 2.15828 | 2.27126 | 2.1308  | 1.98701 | 2.00299 | 2.05448 |
| chr8, mir-383    | 1.993   | 2.09291 | 2.13218 | 2.20282 | 1.98418 | 2.19764 | 2.18791 | 2.17045 |
| chr8, mir-320, l | 2.06003 | 2.15776 | 2.01285 | 2.16361 | 2.18811 | 2.0348  | 1.9891  | 2.027   |

|                   |         |         |         |         |         |         |         |         |
|-------------------|---------|---------|---------|---------|---------|---------|---------|---------|
| chr8, mir-486     | 2.21259 | 2.39906 | 2.11129 | 2.1587  | 2.21976 | 1.97012 | 1.98988 | 2.03129 |
| chr8, mir-124a-   | 1.96039 | 1.9382  | 1.61218 | 2.09083 | 1.92615 | 1.75006 | 2.08648 | 2.09936 |
| chr8, mir-599     | 1.7504  | 1.77134 | 1.54228 | 1.99416 | 1.95899 | 2.09866 | 2.02718 | 2.04933 |
| chr8, mir-548a-   | 1.89713 | 1.92754 | 1.56738 | 2.08434 | 1.97107 | 2.06738 | 2.06811 | 2.06172 |
| chr8, mir-548d-   | 1.91112 | 1.98328 | 2.27627 | 2.03433 | 2.06283 | 1.96112 | 1.92836 | 1.94097 |
| chr8, mir-30b, l  | 1.85566 | 1.92079 | 2.36533 | 2.03993 | 1.97487 | 2.01441 | 1.95395 | 1.97329 |
| chr8, AGO2        | 2.03935 | 2.16256 | 2.37358 | 2.09809 | 2.15148 | 1.92642 | 1.90812 | 1.96509 |
| chr8, mir-151     | 1.90925 | 1.94342 | 2.34725 | 2.02058 | 2.08108 | 1.95892 | 1.90025 | 1.92725 |
| chr8, mir-661     | 2.34    | 2.43676 | 2.26892 | 2.26865 | 2.07189 | 1.86892 | 1.87541 | 2.00595 |
| chr9, mir-101-2   | 1.98311 | 1.3055  | 1.64166 | 2.10934 | 2.10497 | 1.7255  | 1.98887 | 2.03715 |
| chr9, mir-491     | 1.9847  | 1.25918 | 1.63567 | 1.48179 | 2.13104 | 1.74634 | 2.02164 | 2.06634 |
| chr9, mir-31      | 1.92449 | 1.98958 | 1.62017 | 1.43797 | 2.05644 | 1.77763 | 2.06441 | 2.11551 |
| chr9, mir-204     | 2.02255 | 2.10737 | 2.01737 | 2.12642 | 1.95109 | 2.05234 | 2.05234 | 2.07219 |
| chr9, mir-7-1     | 2.02808 | 2.08492 | 2.0005  | 1.57058 | 2.11842 | 2.03783 | 2.00642 | 2.05325 |
| chr9, let-7a-1, l | 1.9868  | 2.08536 | 1.96278 | 1.50206 | 2.12928 | 2.3866  | 1.99433 | 2.01464 |
| chr9, mir-23b, l  | 2.1039  | 2.262   | 2.0619  | 1.588   | 2.03114 | 2.30562 | 1.99571 | 2.06191 |
| chr9, mir-32      | 1.96508 | 2.02422 | 1.99227 | 2.13125 | 2.02508 | 2.40266 | 1.99188 | 2.02656 |
| chr9, mir-455     | 2.28638 | 2.46124 | 2.11181 | 2.21133 | 2.00543 | 2.19914 | 1.97733 | 2.01191 |
| chr9, mir-147     | 2.12698 | 2.25135 | 2.0201  | 2.13302 | 2.02396 | 2.25208 | 1.9551  | 1.97729 |
| chr9, mir-600     | 2.05416 | 2.13241 | 1.98818 | 2.06131 | 2.12555 | 2.28066 | 1.90161 | 1.98591 |
| chr9, mir-601     | 2.1774  | 2.35135 | 2.05062 | 2.18448 | 2.19927 | 2.20073 | 1.91427 | 1.96083 |
| chr9, mir-181a-   | 1.97819 | 2.1094  | 1.91647 | 2.12181 | 2.10681 | 2.29457 | 1.90595 | 1.9669  |
| chr9, mir-199b    | 2.28909 | 2.54127 | 2.01145 | 2.27455 | 2.13527 | 2.13764 | 1.91745 | 1.98418 |
| chr9, mir-219-2   | 2.25513 | 2.44882 | 2.02013 | 2.23118 | 2.18592 | 2.19382 | 1.90789 | 1.98579 |
| chr9, mir-126     | 2.33815 | 2.52111 | 2.18593 | 2.24222 | 1.97296 | 2.02407 | 1.88926 | 2.03593 |
| chr9, mir-602     | 2.10737 | 2.23447 | 2.32263 | 2.13158 | 2.0129  | 2.19211 | 1.92289 | 2.02237 |
| chr10, mir-511-   | 2.28    | 3.3     | 1.625   | 2.215   | 2.045   | 2.055   | 1.945   | 2.055   |
| chr10, mir-603    | 2.0376  | 2.77372 | 1.61843 | 2.14736 | 1.98893 | 2.05595 | 2.05686 | 2.09488 |
| chr10, mir-604    | 1.97904 | 2.06415 | 1.59778 | 2.12467 | 1.98526 | 2.07852 | 2.03556 | 2.06067 |
| chr10, mir-605    | 1.94292 | 2.03409 | 1.59613 | 2.03496 | 1.96701 | 2.11117 | 2.04088 | 2.08708 |
| chr10, mir-606    | 1.9814  | 2.08785 | 1.58086 | 2.06301 | 2.0186  | 2.00796 | 1.99086 | 2.02323 |
| chr10, mir-346    | 2.25351 | 2.34392 | 1.72865 | 2.04392 | 2.15081 | 1.95662 | 1.995   | 2.04878 |
| chr10, mir-107    | 1.98676 | 2.08351 | 1.59263 | 1.98009 | 2.09491 | 2.03702 | 1.98246 | 2.00228 |
| chr10, mir-607    | 2.01186 | 2.18402 | 1.96216 | 2.04567 | 2.20206 | 1.99206 | 1.94918 | 1.98485 |
| chr10, mir-608    | 2.18727 | 2.36314 | 2.02281 | 2.04512 | 2.20083 | 1.97694 | 1.9557  | 2.01851 |
| chr10, mir-146b   | 2.22355 | 2.41113 | 2.08016 | 2.085   | 2.15903 | 1.95307 | 1.92306 | 1.99629 |
| chr10, mir-609    | 2.0069  | 2.0785  | 1.99717 | 1.92973 | 2.13407 | 2.01044 | 1.98301 | 2.01407 |

|                  |         |         |         |         |         |         |         |         |
|------------------|---------|---------|---------|---------|---------|---------|---------|---------|
| chr10, mir-202   | 2.24756 | 2.26415 | 2.07537 | 2.14732 | 2.04    | 1.98659 | 1.92854 | 2.01317 |
| chr11, mir-210   | 2.20068 | 2.35227 | 2.05182 | 2.16682 | 2.08045 | 1.71273 | 1.91409 | 2.01341 |
| chr11, mir-483   | 2.11273 | 2.24636 | 2.00849 | 2.14955 | 2.05773 | 1.69439 | 1.93894 | 1.98515 |
| chr11, mir-610   | 1.8641  | 1.91165 | 2.04763 | 2.03842 | 1.97676 | 1.75309 | 2.04086 | 2.07547 |
| chr11, mir-129-  | 2.10762 | 2.25846 | 2.01783 | 2.12741 | 2.08217 | 2.3158  | 1.99266 | 2.03182 |
| chr11, mir-130a  | 2.10322 | 2.23885 | 1.98804 | 2.17747 | 2.12816 | 1.97793 | 1.94966 | 2.03874 |
| chr11, mir-611   | 2.15581 | 2.24128 | 2.03974 | 2.13786 | 2.10564 | 1.95915 | 1.94846 | 2.01555 |
| chr11, mir-192,  | 2.25672 | 2.41466 | 2.02897 | 2.20983 | 2.20086 | 1.9069  | 1.91483 | 1.99879 |
| chr11, mir-612   | 2.07818 | 2.22558 | 2.00636 | 2.16961 | 2.21623 | 1.95701 | 1.89532 | 1.99325 |
| chr11, MALAT1    | 2.01929 | 2.165   | 1.95102 | 2.11949 | 2.27306 | 1.92571 | 1.89888 | 1.98327 |
| chr11, mir-139   | 2.41482 | 2.63446 | 2.13096 | 1.82265 | 2.14964 | 1.92795 | 1.96313 | 2.01759 |
| chr11, mir-326   | 2.43042 | 2.66639 | 2.10958 | 1.80111 | 2.11444 | 1.93333 | 1.97945 | 2.05264 |
| chr11, PIWIL4    | 1.96349 | 1.97837 | 1.99861 | 2.10529 | 1.99359 | 2.07898 | 2.00783 | 2.03607 |
| chr11, mir-34b,  | 1.89657 | 2.04521 | 1.52514 | 2.02    | 2.09356 | 2.68144 | 1.90774 | 1.95329 |
| chr11, mir-125b  | 1.98321 | 2.03702 | 1.5622  | 2.07911 | 1.97256 | 2.38054 | 2.0006  | 2.00571 |
| chr11, let-7a-2, | 2.01753 | 2.1094  | 1.57044 | 2.13253 | 1.99247 | 2.35505 | 2.00231 | 2.01187 |
| chr12, mir-200c  | 2.56215 | 1.63748 | 1.69972 | 2.16383 | 2.16589 | 1.63    | 1.9229  | 1.97598 |
| chr12, mir-613   | 2.37605 | 1.34704 | 1.50432 | 2.0916  | 2.02568 | 1.63173 | 1.98494 | 1.98358 |
| chr12, mir-614   | 2.49026 | 1.48956 | 1.59869 | 2.16246 | 2.00044 | 1.67167 | 1.98105 | 1.9886  |
| chr12, mir-196a  | 2.61477 | 2.1671  | 1.61897 | 2.07215 | 2.0214  | 1.8471  | 2.69458 | 1.92598 |
| chr12, mir-615   | 2.72721 | 2.28623 | 1.54074 | 2.16549 | 2.04434 | 1.84869 | 2.73041 | 1.9127  |
| chr12, mir-148b  | 2.62254 | 2.10576 | 1.52686 | 2.08907 | 2.08788 | 1.86458 | 2.71    | 1.88161 |
| chr12, mir-616   | 2.59424 | 2.08596 | 1.55424 | 3.01556 | 2.09596 | 1.88475 | 2.24909 | 1.90869 |
| chr12, mir-26a-  | 2.51174 | 2.04791 | 1.5833  | 2.91904 | 2.08591 | 1.91    | 2.24183 | 1.9053  |
| chr12, let-7i    | 2.38111 | 1.85593 | 1.46068 | 3.09716 | 1.92222 | 1.9942  | 2.43833 | 1.97216 |
| chr12, mir-548c  | 2.53033 | 2.06292 | 1.50467 | 3.33017 | 2.03942 | 1.92925 | 2.32458 | 1.9345  |
| chr12, mir-617   | 2.23664 | 3.41898 | 1.94285 | 2.0181  | 1.99372 | 2.04978 | 2.03248 | 2.02007 |
| chr12, mir-618   | 2.24917 | 3.30352 | 1.98393 | 2.01752 | 1.97262 | 2.07331 | 2.01607 | 1.99793 |
| chr12, mir-492   | 2.49162 | 3.70191 | 1.9625  | 2.17059 | 2.05338 | 1.91632 | 1.94397 | 1.97912 |
| chr12, mir-331   | 2.21939 | 3.42947 | 1.88427 | 2.00214 | 2.17481 | 1.97962 | 1.91015 | 1.95832 |
| chr12, mir-135a  | 2.3004  | 3.26993 | 1.9674  | 2.0572  | 1.89253 | 2.025   | 2.0346  | 2.01387 |
| chr12, mir-619   | 2.61052 | 3.53336 | 1.99147 | 2.21078 | 2.15879 | 1.93552 | 1.96293 | 1.96845 |
| chr12, mir-620   | 2.33476 | 3.25973 | 1.90483 | 2.09503 | 1.96208 | 1.98255 | 1.97859 | 1.97732 |
| chr12, PIWIL1    | 2.3374  | 2.50319 | 1.96009 | 2.04445 | 1.94782 | 1.99845 | 2.00794 | 2.01206 |
| chr12, RAN       | 2.31462 | 2.55872 | 1.92154 | 2.06859 | 2.04372 | 1.94692 | 1.97628 | 1.96462 |
| chr13, mir-621   | 2.03548 | 2.14645 | 1.57548 | 2.12661 | 2.18145 | 1.99242 | 1.94597 | 2.01435 |
| chr13, mir-16-1  | 1.7138  | 1.71132 | 1.53397 | 1.94826 | 2.05769 | 2.09653 | 1.94479 | 2.01306 |

|                 |         |         |         |         |         |         |         |         |
|-----------------|---------|---------|---------|---------|---------|---------|---------|---------|
| chr13, mir-622  | 2.29946 | 1.05261 | 1.90802 | 2.14162 | 1.80135 | 2.09649 | 1.99604 | 2.01964 |
| chr13, mir-17,  | 2.47037 | 1.20774 | 1.88098 | 2.55143 | 1.81932 | 1.96684 | 1.92639 | 1.96383 |
| chr13, mir-623  | 1.99626 | 1.34616 | 2.03404 | 2.11071 | 2.16848 | 1.9902  | 1.91293 | 1.99616 |
| chr14, mir-208  | 2.21734 | 2.35028 | 1.71982 | 1.64422 | 2.0911  | 1.97606 | 2.35716 | 2.01385 |
| chr14, mir-624  | 2.05964 | 2.11714 | 1.54357 | 1.53869 | 2.1406  | 2.04964 | 2.48    | 2.01976 |
| chr14, mir-625  | 1.86839 | 1.87299 | 1.54333 | 2.06299 | 2.15586 | 2.02736 | 2.4423  | 2.00701 |
| chr14, Dicer1   | 2.00232 | 2.06569 | 1.56194 | 1.47216 | 2.08545 | 2.00409 | 2.47077 | 2.00869 |
| chr14, mir-342  | 2.16323 | 2.23729 | 1.69906 | 1.66073 | 2.1324  | 1.98083 | 2.35115 | 2.01156 |
| chr14, mir-345  | 2.24241 | 2.37648 | 1.88833 | 1.79741 | 2.08148 | 1.94259 | 2.21444 | 2.01426 |
| chr14, mir-770, | 2.15691 | 2.23195 | 1.71181 | 1.61752 | 1.98601 | 1.99399 | 2.39057 | 2.02513 |
| chr14, mir-379, | 2.09791 | 2.16248 | 1.70604 | 1.60974 | 1.988   | 1.98561 | 2.40557 | 2.02287 |
| chr14, mir-203  | 2.31294 | 2.44676 | 2.02206 | 1.90382 | 2.01441 | 1.86588 | 2.21853 | 2.02294 |
| chr15, mir-211  | 2.19674 | 2.38194 | 1.69439 | 2.22041 | 2.14286 | 1.68531 | 1.98102 | 1.89225 |
| chr15, mir-626  | 1.96023 | 1.96082 | 1.56482 | 2.07635 | 2.21141 | 2.09035 | 1.98318 | 1.88624 |
| chr15, mir-627  | 2.0599  | 2.16429 | 1.58541 | 2.17265 | 2.20643 | 2.04286 | 1.99276 | 1.82469 |
| chr15, mir-628  | 1.88288 | 2.79545 | 1.54379 | 2.08288 | 2.0478  | 2.11932 | 2.01689 | 2.05258 |
| chr15, mir-190  | 2.1163  | 2.1837  | 1.63311 | 2.17274 | 2.06222 | 1.99363 | 2.01044 | 2.04148 |
| chr15, mir-422a | 2.16778 | 2.29733 | 1.69333 | 2.202   | 2.20778 | 1.98656 | 1.97556 | 2.03756 |
| chr15, mir-629  | 2.24264 | 2.2392  | 1.7328  | 2.22392 | 2.26256 | 2.0128  | 2.00688 | 2.0412  |
| chr15, mir-630  | 1.99513 | 2.02739 | 1.57487 | 2.12096 | 2.17861 | 2.05678 | 2.00391 | 2.05035 |
| chr15, mir-631  | 2.26228 | 2.39101 | 1.77798 | 2.23165 | 2.18595 | 1.97899 | 1.94013 | 2.05911 |
| chr15, mir-184  | 2.17857 | 2.27491 | 1.67875 | 2.16062 | 2.09491 | 1.96429 | 1.98473 | 2.05804 |
| chr15, mir-549  | 2.2091  | 2.36072 | 1.67378 | 2.26495 | 2.05622 | 2.02649 | 2.02829 | 2.05649 |
| chr15, mir-7-2  | 2.12726 | 2.26345 | 1.63143 | 2.19309 | 2.16059 | 2.06274 | 2.00536 | 2.07202 |
| chr15, mir-9-3  | 2.22235 | 2.31939 | 1.71245 | 2.17418 | 2.11949 | 2.00949 | 1.98704 | 2.0549  |
| chr16, mir-662  | 2.235   | 1.95462 | 1.93769 | 2.10154 | 2.04192 | 1.94385 | 2.16385 | 2.03115 |
| chr16, mir-193b | 2.16902 | 1.55946 | 1.62652 | 2.19674 | 2.22478 | 1.95598 | 2.43022 | 1.98467 |
| chr16, mir-484  | 1.99826 | 7.37652 | 1.54113 | 2.12783 | 2.11939 | 1.98104 | 2.44652 | 1.99748 |
| chr16, mir-138- | 2.11037 | 1.55111 | 1.72648 | 1.63315 | 2.21574 | 1.69694 | 2.37065 | 2.00259 |
| chr16, mir-328  | 2.20674 | 1.78694 | 1.83112 | 2.52694 | 2.09775 | 1.73714 | 2.26286 | 1.98878 |
| chr16, mir-140  | 2.08293 | 1.48195 | 1.60585 | 2.65963 | 2.13573 | 1.65354 | 2.36829 | 2.01317 |
| chr16, mir-768  | 1.9229  | 1.23178 | 1.52645 | 2.08177 | 2.18184 | 1.64421 | 2.48914 | 1.98224 |
| chr17, mir-22   | 2.35907 | 1.80227 | 1.81933 | 2.3296  | 2.24013 | 1.7044  | 1.99693 | 2.0648  |
| chr17, mir-132, | 2.25619 | 1.71365 | 1.79651 | 2.25937 | 2.25937 | 1.76651 | 2.00206 | 2.08365 |
| chr17, mir-195, | 2.31078 | 1.67971 | 1.78796 | 2.26    | 2.17544 | 1.75913 | 2.00369 | 2.07486 |
| chr17, mir-324  | 2.39348 | 1.80991 | 1.74286 | 2.28446 | 2.25964 | 1.73107 | 2.01196 | 2.09268 |
| chr17, mir-33b  | 2.35792 | 2.45625 | 1.92444 | 2.18611 | 2.13194 | 1.79014 | 1.98472 | 2.07208 |

|                 |         |         |         |         |         |         |         |         |
|-----------------|---------|---------|---------|---------|---------|---------|---------|---------|
| chr17, mir-451, | 2.19278 | 2.34833 | 1.63352 | 2.155   | 2.19648 | 1.94796 | 1.93315 | 2.00556 |
| chr17, mir-423  | 1.94    | 2.05947 | 1.53863 | 2.10768 | 2.21505 | 2.01579 | 1.93463 | 1.9779  |
| chr17, mir-193a | 2.17137 | 2.3225  | 1.69298 | 2.22524 | 2.15468 | 1.98218 | 1.96024 | 2.01742 |
| chr17, mir-632  | 1.92735 | 1.9923  | 1.5523  | 2.10956 | 2.24044 | 2.02956 | 1.94062 | 2.0008  |
| chr17, mir-152  | 2.19833 | 2.38111 | 1.65269 | 2.21065 | 2.15787 | 1.94009 | 1.90926 | 1.99824 |
| chr17, mir-10a  | 2.20771 | 2.29254 | 1.62686 | 2.23941 | 2.07517 | 1.92729 | 1.92136 | 1.99424 |
| chr17, mir-196a | 2.18941 | 2.35471 | 1.64069 | 2.21627 | 2.04539 | 1.94971 | 1.9551  | 2.00676 |
| chr17, mir-142  | 2.27012 | 3.10841 | 1.79427 | 2.26256 | 2.12415 | 1.93085 | 1.98207 | 2.03719 |
| chr17, mir-454, | 1.98482 | 2.73156 | 1.52045 | 2.09963 | 2.11734 | 2.02259 | 1.94407 | 2.00918 |
| chr17, mir-21   | 2.04    | 2.39991 | 1.48275 | 2.1767  | 2.20367 | 1.95706 | 1.93505 | 1.99505 |
| chr17, mir-633  | 1.99115 | 2.06423 | 1.555   | 2.08897 | 2.03628 | 2.03782 | 1.96833 | 2.00026 |
| chr17, mir-634  | 2.01781 | 2.16092 | 1.6184  | 2.08126 | 2.04403 | 2.03244 | 1.99219 | 2.05563 |
| chr17, mir-548c | 2.00753 | 2.11708 | 1.53461 | 2.1627  | 2.16079 | 1.98831 | 1.94169 | 1.98809 |
| chr17, mir-635  | 2.13299 | 2.26402 | 1.61586 | 2.16081 | 2.15678 | 1.98552 | 1.93713 | 1.99483 |
| chr17, mir-636  | 2.03381 | 2.07504 | 1.58858 | 2.1308  | 2.18398 | 1.99097 | 1.92186 | 1.99177 |
| chr17, mir-657, | 2.23463 | 2.27219 | 1.8261  | 2.13439 | 2.02707 | 1.89537 | 1.91732 | 2.04439 |
| chr18, mir-133a | 3.15056 | 1.86062 | 1.48049 | 1.94805 | 2.0659  | 2.38326 | 1.94285 | 1.99514 |
| chr18, mir-187  | 3.32493 | 2.04681 | 1.59739 | 2.03348 | 2.01275 | 2.36362 | 1.98    | 2.00812 |
| chr18, mir-122a | 3.4737  | 2.9751  | 1.6076  | 2.1252  | 2.0102  | 2.2758  | 1.9356  | 1.9738  |
| chr19, mir-637  | 2.23179 | 2.30949 | 2.06538 | 2.20179 | 2.1459  | 1.95077 | 1.90154 | 2.05256 |
| chr19, mir-7-3  | 2.2246  | 2.3728  | 2.0304  | 2.2284  | 2.1708  | 1.9342  | 1.9318  | 2.0122  |
| chr19, mir-638  | 2.212   | 2.306   | 1.67089 | 2.706   | 2.16933 | 1.95889 | 1.92844 | 2.024   |
| chr19, mir-199a | 2.3198  | 2.4751  | 1.79235 | 2.77078 | 2.19392 | 1.94412 | 1.92745 | 2.02412 |
| chr19, mir-24-2 | 2.25462 | 2.36923 | 1.79211 | 2.64942 | 2.13077 | 1.95327 | 1.93769 | 2.02365 |
| chr19, mir-181c | 2.41982 | 2.624   | 1.83382 | 2.72436 | 2.19454 | 1.91291 | 1.91855 | 2.02182 |
| chr19, mir-639  | 2.22707 | 2.29653 | 1.67853 | 2.74467 | 2.226   | 1.972   | 1.93227 | 2.0276  |
| chr19, mir-640  | 2.17202 | 2.3349  | 1.6474  | 2.77385 | 2.23019 | 1.99808 | 1.93779 | 2.02144 |
| chr19, mir-641  | 2.24509 | 2.97345 | 1.73491 | 2.69673 | 2.12836 | 1.97127 | 1.958   | 2.05436 |
| chr19, mir-330  | 2.29041 | 2.56714 | 1.74306 | 2.2802  | 2.19571 | 1.95776 | 1.92449 | 2.01265 |
| chr19, mir-642  | 2.24208 | 2.44113 | 1.74283 | 2.21358 | 2.19736 | 1.94019 | 1.91453 | 2.00415 |
| chr19, mir-769  | 2.34193 | 2.4607  | 1.72474 | 2.26281 | 2.11877 | 1.92263 | 1.92842 | 2.00825 |
| chr19, mir-150  | 2.25238 | 2.33937 | 1.7573  | 2.26524 | 2.22429 | 1.93635 | 1.89936 | 2.03444 |
| chr19, mir-99b, | 2.29114 | 2.48414 | 1.727   | 2.284   | 2.02986 | 1.97271 | 1.969   | 2.03243 |
| chr19, mir-643  | 2.02139 | 2.12949 | 1.57418 | 2.16937 | 2.03291 | 1.99051 | 1.97013 | 2.08532 |
| chr19, mir-512- | 2.17449 | 2.25289 | 1.61737 | 2.18057 | 2.02665 | 2.01134 | 1.98598 | 2.04794 |
| chr20, mir-103- | 1.96513 | 2.05265 | 1.5465  | 2.0453  | 2.10957 | 1.65043 | 1.91043 | 1.96479 |
| chr20, mir-663  | 1.95885 | 2.07385 | 1.495   | 2.05231 | 1.92    | 1.86154 | 2.03308 | 2.07308 |



|                   |          |          |         |         |          |         |         |         |
|-------------------|----------|----------|---------|---------|----------|---------|---------|---------|
| chr20, mir-644    | 1.89055  | 1.99     | 1.45296 | 2.02296 | 2.1363   | 1.6462  | 1.88055 | 1.93157 |
| chr20, mir-499    | 2.2004   | 2.33667  | 1.77987 | 2.1304  | 2.06613  | 1.68107 | 1.90613 | 1.99307 |
| chr20, mir-645    | 2.06776  | 2.1557   | 1.64093 | 2.09065 | 2.05673  | 1.64813 | 1.93645 | 1.97748 |
| chr20, mir-296    | 2.21211  | 2.43295  | 1.634   | 2.20168 | 2.11695  | 1.64537 | 1.94232 | 2.00558 |
| chr20, mir-646    | 2.02286  | 2.07286  | 1.61929 | 2.09908 | 1.93225  | 1.71071 | 2.01122 | 2.05133 |
| chr20, mir-1-1,   | 2.17437  | 2.32891  | 1.84813 | 2.19656 | 2.00844  | 1.68734 | 1.88453 | 2.00438 |
| chr20, mir-124a   | 2.26768  | 2.37196  | 1.87929 | 2.12018 | 2.02875  | 1.6925  | 1.92982 | 2.00393 |
| chr20, mir-647    | 2.06192  | 2.20096  | 1.71942 | 2.07923 | 2.06346  | 1.71077 | 1.87577 | 1.97962 |
| chr21, mir-99a,   | 1.91915  | 2.02062  | 1.99868 | 1.51558 | 1.95512  | 2.08481 | 2.07868 | 2.12349 |
| chr21, mir-125b   | 1.82481  | 1.88506  | 2.00074 | 1.42914 | 1.94383  | 2.13006 | 2.05994 | 2.11481 |
| chr21, mir-155    | 1.90662  | 1.97393  | 1.9829  | 2.1109  | 1.97821  | 2.03779 | 1.98407 | 2.04214 |
| chr21, mir-802    | 2.00484  | 2.81944  | 1.98734 | 2.11621 | 2.03024  | 2.00589 | 1.96823 | 2.01218 |
| chr22, mir-648    | 2.16811  | 1.56662  | 1.67135 | 2.19986 | 2.2377   | 1.99405 | 1.98649 | 2.04297 |
| chr22, mir-185    | 2.18129  | 1.68443  | 2.11371 | 2.17614 | 2.14586  | 1.96057 | 1.931   | 2.03886 |
| chr22, DGCR8-     | 2.11411  | 1.63741  | 2.11402 | 2.12446 | 2.13991  | 1.95268 | 1.95875 | 2.01473 |
| chr22, mir-649    | 2.26106  | 1.78298  | 2.13489 | 2.15745 | 2.0934   | 1.9583  | 1.94745 | 2.03894 |
| chr22, mir-130b   | 2.23035  | 1.67456  | 1.76474 | 2.2086  | 2.20667  | 1.99561 | 1.94474 | 2.04158 |
| chr22, mir-650    | 2.39     | 1.69987  | 1.97821 | 2.5091  | 1.76077  | 1.86833 | 1.06949 | 2.05115 |
| chr22, PIWIL3     | 2.05872  | 1.3464   | 1.59156 | 2.11829 | 2.15289  | 1.99474 | 1.94228 | 2.00521 |
| chr22, mir-658,   | 2.25089  | 1.61532  | 1.69608 | 2.25987 | 2.20798  | 1.95418 | 1.92709 | 2.01696 |
| chr22, mir-33     | 2.20583  | 1.63417  | 1.73528 | 2.14389 | 2.19986  | 1.99222 | 1.93833 | 2.02625 |
| chr22, let-7a-3,  | 2.36294  | 2.16922  | 1.9949  | 2.25078 | 2.0849   | 1.89961 | 1.92824 | 2.08412 |
| chrX, mir-651     | 1.04368  | 1.0792   | 1.31336 | 1.51312 | 0.96984  | 2.01528 | 1.53456 | 1.81936 |
| chrX, mir-221,    | 0.966227 | 1.02509  | 1.28887 | 1.49047 | 0.95566  | 2.01085 | 1.50359 | 1.79462 |
| chrX, mir-532,    | 1.01184  | 1.07263  | 1.25377 | 1.50035 | 0.961316 | 1.97246 | 1.42991 | 1.80825 |
| chrX, mir-98, let | 1.07568  | 1.12072  | 1.26353 | 1.53935 | 1.0159   | 1.9482  | 1.42705 | 1.77374 |
| chrX, mir-223     | 1.04484  | 1.04672  | 1.29031 | 1.51359 | 1.01672  | 1.98875 | 1.47594 | 1.81797 |
| chrX, mir-421     | 1.0148   | 1.06929  | 1.29878 | 1.49827 | 0.97949  | 2.04296 | 1.48204 | 1.80735 |
| chrX, mir-545,    | 0.998374 | 1.08211  | 1.28984 | 1.48089 | 0.987073 | 2.05585 | 1.51756 | 1.79837 |
| chrX, mir-384     | 0.971428 | 0.979107 | 1.30036 | 1.42607 | 0.976786 | 2.03982 | 1.53321 | 1.80679 |
| chrX, mir-325     | 0.962727 | 0.996364 | 1.31114 | 1.4375  | 0.974545 | 2.01477 | 1.51023 | 1.81864 |
| chrX, mir-361     | 0.916882 | 0.950646 | 1.32871 | 1.42559 | 0.947311 | 2.10226 | 1.5557  | 1.85591 |
| chrX, mir-652     | 1.00935  | 1.07411  | 1.33935 | 1.46346 | 1.00224  | 1.98112 | 1.5029  | 1.79374 |
| chrX, mir-448     | 0.88625  | 0.906875 | 1.37462 | 1.39425 | 0.94     | 2.07562 | 1.56187 | 1.85338 |
| chrX, mir-766     | 1.09489  | 1.19489  | 1.30717 | 1.61674 | 1.06783  | 1.89783 | 1.36196 | 1.76359 |
| chrX, mir-220     | 0.976097 | 1.06317  | 1.30537 | 1.44951 | 0.987561 | 1.95415 | 1.4439  | 1.77171 |
| chrX, mir-363,    | 0.935    | 0.994384 | 1.29492 | 1.39769 | 0.975    | 1.94408 | 1.48908 | 1.73185 |

|                 |          |          |         |         |          |         |         |         |
|-----------------|----------|----------|---------|---------|----------|---------|---------|---------|
| chrX, mir-450-1 | 0.997879 | 1.07712  | 1.28894 | 1.46447 | 0.982727 | 1.92227 | 1.42977 | 1.76061 |
| chrX, mir-504   | 0.929769 | 0.962384 | 1.32646 | 1.37046 | 0.924846 | 2.04485 | 1.53069 | 1.79392 |
| chrX, mir-505   | 0.956484 | 0.992198 | 1.31055 | 1.39484 | 0.965823 | 1.99143 | 1.51132 | 1.78297 |
| chrX, mir-513-1 | 0.980568 | 1.73835  | 1.35979 | 1.45737 | 0.940206 | 2.02217 | 1.55263 | 1.8283  |
| chrX, FMR1      | 0.936666 | 1.59525  | 1.32415 | 1.3961  | 0.990532 | 1.98447 | 1.48192 | 1.75631 |
| chrX, mir-224,  | 1.07969  | 1.8524   | 1.36713 | 1.54062 | 0.944186 | 1.97419 | 1.47031 | 1.81457 |
| chrX, mir-105-1 | 1.00022  | 1.85244  | 1.38722 | 1.47344 | 0.937222 | 1.98644 | 1.54878 | 1.80156 |

| TUMOR ID        | 5935    | 6290    | 642     | 7089    | 7119    | 7970    | 1309    | 1320    |
|-----------------|---------|---------|---------|---------|---------|---------|---------|---------|
| MiRNA ID        |         |         |         |         |         |         |         |         |
| chr1, mir-200b, | 1.88046 | 1.97093 | 2.03698 | 2.17884 | 1.68767 | 1.72977 | 2.10395 | 2.06209 |
| chr1, mir-551a  | 1.93064 | 2.08032 | 2.03548 | 1.8171  | 1.72226 | 1.79161 | 2.14065 | 1.8229  |
| chr1, mir-34a   | 1.84867 | 2.04773 | 2.0896  | 1.60747 | 1.2936  | 2.0036  | 2.14853 | 1.92613 |
| chr1, mir-801   | 1.87762 | 1.99167 | 2.0381  | 2.28143 | 1.80143 | 1.99476 | 2.12405 | 1.88452 |
| chr1, mir-552   | 1.94857 | 2.23104 | 2.06766 | 2.2787  | 1.8674  | 1.99701 | 2.1261  | 1.91442 |
| chr1, AGO4, A   | 1.94643 | 2.01479 | 2.06442 | 2.26522 | 1.73024 | 2.04188 | 2.11142 | 1.89265 |
| chr1, mir-30e,  | 1.92037 | 2.06059 | 2.03787 | 2.27956 | 1.80971 | 2.01037 | 2.14544 | 1.91478 |
| chr1, mir-101-1 | 1.97381 | 2.04738 | 2.01921 | 2.26659 | 1.78309 | 2.03151 | 2.12087 | 1.99079 |
| chr1, SERBP1    | 1.97859 | 2.04935 | 1.97136 | 2.26772 | 1.74174 | 2.04239 | 2.01413 | 1.90685 |
| chr1, mir-186   | 2.14376 | 2.20168 | 1.90973 | 2.34141 | 1.71013 | 2.15497 | 1.97906 | 1.97349 |
| chr1, mir-137   | 2.09631 | 2.14829 | 1.85801 | 2.39352 | 1.6925  | 2.08989 | 2.08199 | 1.905   |
| chr1, mir-553   | 1.99928 | 2.08056 | 1.96448 | 2.34192 | 1.74736 | 2.02224 | 2.09664 | 1.93408 |
| chr1, mir-197   | 1.97213 | 2.06589 | 2.04248 | 2.31872 | 1.13284 | 2.0456  | 2.06674 | 1.91709 |
| chr1, DDX20     | 1.91946 | 2.01854 | 2.07913 | 2.29979 | 1.19859 | 2.0313  | 2.14676 | 1.96708 |
| chr1, mir-554   | 1.83631 | 1.95881 | 1.97298 | 2.13452 | 1.7675  | 1.90857 | 2.04143 | 1.8325  |
| chr1, mir-92b   | 1.77509 | 2.03963 | 2.07315 | 2.20046 | 1.85565 | 1.85241 | 2.18315 | 1.87694 |
| chr1, mir-555   | 1.83384 | 1.98589 | 2.01429 | 2.22143 | 1.66053 | 1.91295 | 2.07554 | 1.83205 |
| chr1, mir-9-1   | 1.79181 | 1.91654 | 2.02898 | 2.23559 | 1.76953 | 1.85732 | 2.09543 | 1.86976 |
| chr1, mir-765   | 1.78559 | 1.98883 | 2.00964 | 2.17171 | 1.84378 | 1.89991 | 2.08036 | 1.89    |
| chr1, mir-556   | 1.86635 | 2.00051 | 1.97365 | 2.17153 | 1.73241 | 1.94    | 1.95518 | 1.84774 |
| chr1, mir-557   | 1.89606 | 1.96323 | 1.93465 | 2.16323 | 1.73189 | 1.93055 | 1.97961 | 1.85087 |
| chr1, mir-214,  | 1.97544 | 2.04954 | 1.9641  | 2.24723 | 1.67508 | 1.97769 | 1.89123 | 1.87457 |
| chr1, mir-488   | 1.93035 | 2.09284 | 1.88291 | 2.22759 | 1.77567 | 2.00681 | 1.97248 | 1.85092 |
| chr1, mir-181b- | 1.93108 | 2.03399 | 1.91311 | 2.2648  | 1.58946 | 1.995   | 1.99683 | 1.83642 |
| chr1, mir-135b  | 1.78888 | 2.0499  | 2.04041 | 2.24561 | 1.88663 | 1.94041 | 2.15622 | 1.91837 |
| chr1, mir-29c,  | 1.92494 | 2.12356 | 2.02863 | 2.29675 | 1.80962 | 2.024   | 2.07181 | 1.89788 |

|                  |         |         |         |         |         |         |         |         |
|------------------|---------|---------|---------|---------|---------|---------|---------|---------|
| chr1, mir-205    | 1.94569 | 2.12927 | 1.96789 | 2.27615 | 1.84615 | 2.02789 | 2.00064 | 1.9489  |
| chr1, mir-215,   | 1.99295 | 1.99426 | 1.89795 | 2.27254 | 1.64361 | 2.03861 | 1.97967 | 1.89197 |
| chr2, mir-558    | 2.01809 | 2.09755 | 1.95564 | 1.82391 | 2.22218 | 2.41755 | 2.05664 | 2.58618 |
| chr2, mir-559    | 1.87638 | 1.93862 | 2.05968 | 1.79883 | 1.68415 | 2.34106 | 2.06138 | 2.62043 |
| chr2, mir-217,   | 1.99104 | 2.10306 | 1.93067 | 1.81716 | 1.67575 | 2.37276 | 2.00328 | 2.56194 |
| chr2, mir-560    | 1.96111 | 2.20222 | 2.3     | 2.26667 | 2.06556 | 2.43667 | 2.06222 | 1.84333 |
| chr2, mir-128a   | 2.01571 | 2.00992 | 2.01383 | 1.83571 | 2.2997  | 2.06917 | 2.03316 | 1.17007 |
| chr2, mir-10b    | 1.90185 | 1.98235 | 1.95647 | 1.8447  | 2.29908 | 2.01513 | 2.14437 | 1.98059 |
| chr2, mir-561    | 2.13    | 2.13489 | 1.85907 | 1.86007 | 2.25496 | 2.14014 | 1.97532 | 2.00122 |
| chr2, mir-26b    | 1.86542 | 2.05475 | 2.05186 | 1.91864 | 2.22695 | 1.89864 | 2.13153 | 1.9661  |
| chr2, mir-375    | 1.81699 | 2.04312 | 2.04871 | 1.85677 | 2.3343  | 1.90237 | 2.15    | 1.92613 |
| chr2, mir-153-1  | 1.84974 | 2.07526 | 2.04449 | 1.87051 | 2.35949 | 1.96295 | 2.19654 | 1.95205 |
| chr2, mir-562    | 1.97767 | 2.02283 | 1.98333 | 1.81767 | 2.3045  | 2.0465  | 2.07817 | 1.884   |
| chr2, mir-149    | 1.90625 | 1.9165  | 1.95375 | 1.85525 | 2.19725 | 1.912   | 2.006   | 1.98    |
| chr3, mir-563    | 1.94333 | 2.10302 | 2.01302 | 1.82317 | 1.74349 | 2.00682 | 2.06333 | 1.89127 |
| chr3, mir-128b   | 2.08159 | 2.16683 | 1.91274 | 1.85963 | 1.72963 | 2.07372 | 2.02597 | 1.92762 |
| chr3, mir-26a-1  | 1.92145 | 1.93363 | 2.01524 | 1.82161 | 1.77952 | 2.02814 | 2.04694 | 1.97726 |
| chr3, mir-138-1  | 1.94738 | 2.13809 | 1.94857 | 1.89476 | 1.8481  | 2.02667 | 2.08968 | 1.95317 |
| chr3, mir-564    | 1.95435 | 2.075   | 1.95935 | 1.87033 | 1.8587  | 2.05641 | 2.11717 | 1.96544 |
| chr3, mir-565    | 1.94298 | 2.01226 | 1.95911 | 1.8296  | 1.74508 | 2.06024 | 2.07935 | 1.94024 |
| chr3, mir-425,   | 1.90869 | 2.10495 | 2.1     | 1.88455 | 1.93495 | 1.9999  | 2.20929 | 1.94061 |
| chr3, mir-566    | 1.86373 | 1.85339 | 2.02034 | 1.82712 | 1.88085 | 1.95373 | 2.0983  | 1.94186 |
| chr3, let-7g, mi | 1.89039 | 2.05746 | 2.07094 | 1.8768  | 1.8426  | 1.97481 | 2.18343 | 1.93757 |
| chr3, mir-567    | 1.95876 | 2.09255 | 1.92066 | 1.8692  | 2.31015 | 2.07445 | 2.06292 | 1.95861 |
| chr3, mir-568    | 1.98471 | 2.15809 | 2.03459 | 1.87726 | 2.30554 | 2.02051 | 2.1258  | 1.97662 |
| chr3, mir-198    | 1.97192 | 2.06488 | 1.96376 | 1.84376 | 2.43088 | 2.05048 | 2.07064 | 1.92248 |
| chr3, mir-15b,   | 2.02344 | 2.09552 | 1.91344 | 1.88156 | 2.22247 | 2.02591 | 1.93454 | 1.91357 |
| chr3, mir-551b   | 2.08107 | 2.02728 | 1.84932 | 1.82    | 2.21738 | 2.07485 | 1.86631 | 1.91709 |
| chr3, mir-569    | 1.98111 | 2.03578 | 1.87904 | 1.81385 | 2.35489 | 2.01533 | 1.95926 | 1.8903  |
| chr3, mir-28     | 1.98817 | 2.11349 | 1.98242 | 1.84911 | 1.70864 | 2.02722 | 2.03763 | 1.8797  |
| chr3, mir-570    | 1.21053 | 2.87316 | 1.88816 | 2.06447 | 1.41316 | 2.14947 | 3.70737 | 1.83816 |
| chr4, mir-571    | 1.97176 | 1.86471 | 1.66176 | 2.25294 | 1.93765 | 2.00176 | 1.93706 | 1.96471 |
| chr4, mir-95     | 1.90557 | 2.03943 | 1.58086 | 2.14086 | 1.91643 | 2.05829 | 2.08643 | 1.95757 |
| chr4, mir-572    | 2.07949 | 2.28038 | 1.57646 | 2.28431 | 1.88873 | 2.12734 | 2.2276  | 2.01962 |
| chr4, mir-218-1  | 2.20303 | 2.20639 | 1.47961 | 2.38136 | 1.79987 | 2.1891  | 1.96903 | 2.00303 |
| chr4, mir-573    | 2.08142 | 2.19756 | 1.56677 | 2.31583 | 1.80803 | 2.11063 | 2.02968 | 1.95142 |
| chr4, mir-574    | 1.93333 | 2.09848 | 1.60475 | 2.28323 | 1.77303 | 2.00717 | 2.21859 | 1.95091 |

|                 |         |         |         |         |         |         |         |         |
|-----------------|---------|---------|---------|---------|---------|---------|---------|---------|
| chr4, mir-575   | 1.95709 | 2.09388 | 1.63107 | 2.25272 | 1.85534 | 2.01029 | 2.12155 | 1.93602 |
| chr4, mir-576   | 2.02172 | 2.09241 | 1.53474 | 2.24353 | 1.67483 | 2.08112 | 1.34405 | 1.90698 |
| chr4, mir-367,  | 2.0178  | 2.07924 | 1.53606 | 2.25765 | 1.75136 | 2.12258 | 1.33492 | 1.94644 |
| chr4, mir-577   | 2.13277 | 2.20247 | 1.49355 | 2.27632 | 1.71024 | 2.12566 | 1.31259 | 1.9694  |
| chr4, mir-578   | 2.10127 | 2.10294 | 1.475   | 2.28706 | 1.71579 | 2.11421 | 1.9696  | 1.23071 |
| chr5, Drosha    | 1.95448 | 2.05822 | 2.29355 | 1.81028 | 1.72461 | 1.98954 | 3.2138  | 1.87627 |
| chr5, mir-579   | 1.93238 | 1.95347 | 2.29762 | 1.78177 | 1.68163 | 1.98912 | 3.29612 | 1.8753  |
| chr5, mir-580   | 1.97056 | 2.02432 | 2.1312  | 1.79176 | 1.63264 | 2.006   | 3.1636  | 1.85504 |
| chr5, mir-581   | 2.02545 | 2.07575 | 2.24149 | 1.80321 | 1.72515 | 2.06851 | 1.96351 | 1.88791 |
| chr5, mir-449,  | 1.94181 | 2.0058  | 2.29478 | 1.81471 | 1.68862 | 2.00529 | 2.01746 | 1.86536 |
| chr5, mir-582   | 2.04083 | 2.18058 | 2.26283 | 1.86508 | 1.70183 | 2.05925 | 1.89292 | 1.91717 |
| chr5, mir-9-2   | 1.94412 | 1.86481 | 2.24463 | 1.83325 | 1.69688 | 2.01369 | 2.00638 | 1.92969 |
| chr5, mir-583   | 1.92413 | 1.86887 | 2.3594  | 1.78654 | 1.75466 | 2.04842 | 2.06037 | 1.89    |
| chr5, mir-584   | 1.87663 | 2.16374 | 2.40867 | 1.84988 | 1.75169 | 1.9247  | 2.03855 | 1.86205 |
| chr5, mir-143,  | 1.83208 | 2.03861 | 2.33951 | 1.86    | 1.87951 | 1.92198 | 2.1099  | 1.90366 |
| chr5, mir-378   | 1.8853  | 1.91458 | 2.31385 | 1.83663 | 1.8547  | 1.98385 | 2.02506 | 1.95892 |
| chr5, mir-146a  | 1.91192 | 2.0501  | 2.35081 | 1.85556 | 2.31646 | 1.98596 | 2.03535 | 1.88485 |
| chr5, mir-103-1 | 1.98348 | 2.07659 | 2.25356 | 1.81674 | 2.28932 | 2.00599 | 1.94545 | 1.89667 |
| chr5, mir-218-2 | 1.91    | 1.97888 | 2.22888 | 1.82477 | 2.39925 | 2.00243 | 1.98906 | 1.9371  |
| chr5, mir-585   | 1.91409 | 2.04809 | 2.29591 | 1.82073 | 2.40664 | 1.963   | 2.01518 | 1.87418 |
| chr5, mir-340   | 1.89774 | 2.03914 | 2.37108 | 1.80226 | 2.25677 | 1.97387 | 2.07677 | 1.8329  |
| chr6, mir-548a- | 1.93138 | 2.06642 | 2.04642 | 1.83455 | 2.33642 | 1.99919 | 2.78081 | 2.07024 |
| chr6, mir-219-1 | 1.82082 | 2.17536 | 2.06948 | 1.88464 | 2.35629 | 1.62103 | 2.79144 | 2.02577 |
| chr6, XPO5      | 1.85615 | 2.0159  | 2.02599 | 1.81984 | 2.34186 | 1.96369 | 2.10977 | 2.01202 |
| chr6, mir-586   | 2.07241 | 2.11802 | 1.88104 | 1.84655 | 2.30991 | 2.03647 | 1.91474 | 2.02577 |
| chr6, mir-206,  | 1.88619 | 2.03043 | 2.04194 | 1.82072 | 2.43676 | 1.9564  | 2.06892 | 2.04453 |
| chr6, mir-30c-2 | 2.09625 | 2.14879 | 1.48152 | 1.14485 | 2.33818 | 2.07424 | 2.00807 | 1.22027 |
| chr6, mir-587   | 1.96091 | 2.13809 | 1.70927 | 1.927   | 1.87518 | 1.68209 | 1.53055 | 1.29173 |
| chr6, mir-548b  | 2.04451 | 2.14664 | 1.60717 | 1.92929 | 1.83726 | 1.74911 | 1.45266 | 2.05593 |
| chr6, mir-588   | 2.12377 | 2.07246 | 1.52016 | 1.87803 | 1.65246 | 1.73426 | 1.27967 | 1.9759  |
| chr6, mir-548a- | 1.99228 | 2.08063 | 1.6378  | 1.91622 | 1.8426  | 1.71244 | 1.4937  | 2.04102 |
| chr7, mir-339   | 1.77553 | 1.94737 | 2.18658 | 2.31921 | 2.1879  | 1.82395 | 2.0221  | 1.99342 |
| chr7, mir-589   | 1.7202  | 1.8902  | 2.36902 | 2.34353 | 2.3751  | 1.83569 | 2.0998  | 1.8198  |
| chr7, mir-148a  | 1.81698 | 1.96677 | 2.37739 | 2.46396 | 2.26781 | 1.91615 | 2.03094 | 1.87594 |
| chr7, mir-196b  | 1.74448 | 1.82802 | 2.33    | 2.39531 | 2.25833 | 1.93448 | 2.05323 | 1.92031 |
| chr7, mir-550-1 | 1.90049 | 1.93506 | 2.35889 | 2.48136 | 2.25889 | 1.95259 | 2.05852 | 1.82309 |
| chr7, has-mir-5 | 1.95000 | 2.08000 | 2.32000 | 2.48000 | 2.22000 | 2.02000 | 2.01000 | 1.78000 |

|                   |         |         |         |         |         |         |         |         |
|-------------------|---------|---------|---------|---------|---------|---------|---------|---------|
| chr7, mir-590     | 1.79989 | 1.82516 | 2.35075 | 2.33161 | 2.17269 | 1.88688 | 1.98376 | 1.79591 |
| chr7, mir-653, l  | 1.91306 | 2.00675 | 2.21981 | 2.42325 | 2.09894 | 2.26319 | 1.88325 | 1.77844 |
| chr7, mir-591     | 1.92088 | 2.04208 | 2.15584 | 2.40904 | 2.19568 | 2.31488 | 1.926   | 1.81736 |
| chr7, mir-25, m   | 1.69894 | 1.9746  | 2.41053 | 2.33363 | 2.23425 | 2.05805 | 2.12    | 1.75195 |
| chr7, mir-592     | 1.91962 | 2.01554 | 2.05054 | 2.42415 | 2.247   | 1.95954 | 1.94377 | 1.86208 |
| chr7, SDN1, m     | 1.85457 | 1.95804 | 2.13567 | 2.41125 | 2.28551 | 1.9385  | 1.9853  | 1.82724 |
| chr7, mir-129-1   | 1.77876 | 1.89787 | 2.15663 | 2.35292 | 2.32157 | 1.88809 | 2.04382 | 1.86865 |
| chr7, mir-182, l  | 1.79434 | 1.9305  | 2.25697 | 2.30626 | 2.31545 | 1.88162 | 2.05    | 1.85222 |
| chr7, mir-335     | 1.85773 | 1.94187 | 2.29539 | 2.41016 | 2.25078 | 1.91594 | 1.99469 | 1.84477 |
| chr7, mir-29a, l  | 1.886   | 1.94937 | 2.33558 | 2.42368 | 2.27042 | 1.93895 | 2.03537 | 1.79705 |
| chr7, mir-490     | 2.01769 | 2.0329  | 2.16799 | 2.40651 | 2.16172 | 2.00343 | 1.8516  | 1.86751 |
| chr7, has-mir-5   | 1.87786 | 1.93143 | 2.33417 | 2.34548 | 2.25286 | 1.93369 | 2.01095 | 1.83667 |
| chr7, mir-671     | 1.78086 | 1.93606 | 2.24404 | 2.2651  | 2.24471 | 1.85962 | 2.03894 | 1.87125 |
| chr7, mir-153-2   | 1.76419 | 1.87791 | 2.34314 | 2.32965 | 2.26744 | 1.9093  | 1.9814  | 1.84523 |
| chr7, mir-595     | 1.78667 | 1.94691 | 2.35432 | 2.27877 | 2.32481 | 1.90099 | 2.04086 | 1.82333 |
| chr8, mir-596     | 1.97536 | 2.06043 | 1.94319 | 1.93319 | 1.8958  | 2.15304 | 2.05159 | 2.06362 |
| chr8, mir-597     | 2.08041 | 2.16303 | 1.9769  | 1.94565 | 1.74441 | 2.11483 | 2.00503 | 1.93973 |
| chr8, mir-124a-   | 1.94259 | 2.05982 | 2.00768 | 1.92259 | 1.87866 | 2.01366 | 2.05116 | 1.94679 |
| chr8, mir-598     | 1.89483 | 2.14276 | 2.05011 | 1.95678 | 1.92276 | 1.98356 | 2.12782 | 1.96425 |
| chr8, mir-383     | 2.21409 | 2.32118 | 1.92173 | 1.97345 | 1.73909 | 2.19691 | 2.00082 | 2.02064 |
| chr8, mir-320, l  | 1.92886 | 1.99166 | 2.06311 | 1.88704 | 1.84965 | 2.01215 | 2.11232 | 1.94174 |
| chr8, mir-486     | 1.86353 | 2.01506 | 2.01518 | 1.93035 | 1.91012 | 1.96106 | 2.12976 | 1.97518 |
| chr8, mir-124a-   | 2.05135 | 2.07776 | 1.9316  | 1.88737 | 1.76026 | 2.09141 | 1.97154 | 1.97372 |
| chr8, mir-599     | 2.11201 | 2.07946 | 1.92597 | 1.90443 | 1.73342 | 2.10322 | 1.94886 | 1.89369 |
| chr8, mir-548a-   | 2.04746 | 2.11369 | 1.86451 | 1.95492 | 1.7309  | 2.07754 | 1.95107 | 1.93451 |
| chr8, mir-548d-   | 1.90881 | 2.03306 | 1.93791 | 2.52612 | 1.6544  | 1.98172 | 1.98739 | 1.86813 |
| chr8, mir-30b, l  | 1.96559 | 2.06329 | 1.96046 | 2.59237 | 1.65408 | 1.99849 | 2.15099 | 1.89362 |
| chr8, AGO2        | 1.805   | 1.89358 | 1.97225 | 2.45349 | 1.76954 | 1.91386 | 2.09602 | 1.87111 |
| chr8, mir-151     | 1.88267 | 1.95392 | 1.97975 | 2.565   | 1.72625 | 1.96083 | 2.04942 | 1.83792 |
| chr8, mir-661     | 1.87946 | 2.02811 | 1.98514 | 2.76811 | 1.99568 | 1.82892 | 2.04946 | 2.42919 |
| chr9, mir-101-2   | 1.95106 | 1.98603 | 2.04377 | 1.83874 | 1.76325 | 2.05351 | 2.10636 | 2.00768 |
| chr9, mir-491     | 2.04455 | 2.06933 | 1.92231 | 1.86993 | 1.70866 | 2.105   | 2.0194  | 1.95858 |
| chr9, mir-31      | 2.09381 | 2.08085 | 1.95288 | 1.86119 | 1.67814 | 2.15347 | 1.95695 | 2.01534 |
| chr9, mir-204     | 2.04066 | 2.5373  | 1.98686 | 1.8619  | 1.77263 | 2.06752 | 2.01219 | 1.94087 |
| chr9, mir-7-1     | 1.99358 | 2.55208 | 1.93    | 1.85458 | 1.70408 | 2.03083 | 2.0765  | 1.88783 |
| chr9, let-7a-1, l | 1.9635  | 2.51196 | 1.99155 | 1.85216 | 1.76722 | 2.05361 | 2.06268 | 1.92784 |
| chr9, mir-23b, l  | 1.91581 | 2.42724 | 1.97476 | 1.84991 | 1.86057 | 2.01971 | 2.09514 | 1.9639  |

|                  |         |         |         |         |         |         |         |         |
|------------------|---------|---------|---------|---------|---------|---------|---------|---------|
| chr9, mir-32     | 1.985   | 2.58859 | 1.97328 | 1.82648 | 1.74563 | 2.03477 | 1.99625 | 1.89664 |
| chr9, mir-455    | 1.8639  | 2.42276 | 1.98943 | 1.84695 | 1.91371 | 1.9621  | 2.148   | 1.924   |
| chr9, mir-147    | 1.88698 | 2.47406 | 1.99302 | 1.8051  | 1.78531 | 1.94604 | 2.06958 | 1.87375 |
| chr9, mir-600    | 1.91161 | 2.48912 | 2.01788 | 1.84694 | 1.75781 | 1.98525 | 2.07978 | 1.87883 |
| chr9, mir-601    | 1.81375 | 2.34    | 2.05802 | 1.82417 | 1.8476  | 1.90125 | 2.16031 | 1.88312 |
| chr9, mir-181a-  | 1.91302 | 2.53241 | 2.01569 | 1.81948 | 1.73974 | 1.98431 | 2.08853 | 1.82276 |
| chr9, mir-199b   | 1.85164 | 2.31218 | 2.06491 | 1.83073 | 1.89218 | 1.90309 | 2.16473 | 1.86818 |
| chr9, mir-219-2  | 1.81908 | 2.31882 | 2.04987 | 1.85118 | 1.91474 | 1.91066 | 2.15592 | 1.92171 |
| chr9, mir-126    | 1.91704 | 2.20889 | 1.98222 | 1.98    | 1.96148 | 1.85222 | 2.05963 | 2.10222 |
| chr9, mir-602    | 1.90026 | 2.19605 | 2.00658 | 1.85526 | 1.78184 | 1.90895 | 2.005   | 2.19553 |
| chr10, mir-511-  | 1.995   | 2.19    | 2.535   | 1.905   | 2.37    | 2       | 2.09    | 2       |
| chr10, mir-603   | 2.03694 | 2.11413 | 2.43901 | 1.81959 | 2.34909 | 2.08587 | 2.08537 | 1.96446 |
| chr10, mir-604   | 2.03993 | 2.04467 | 2.45504 | 1.864   | 2.3377  | 2.07467 | 2.01222 | 1.90333 |
| chr10, mir-605   | 2.08321 | 2.17358 | 2.4127  | 1.84577 | 2.35372 | 2.10679 | 1.97197 | 1.92569 |
| chr10, mir-606   | 1.96505 | 2.08118 | 2.38097 | 1.80505 | 2.31946 | 2.00774 | 2.00054 | 1.89172 |
| chr10, mir-346   | 1.85824 | 2.06649 | 2.50041 | 1.22811 | 2.37689 | 1.9523  | 2.10135 | 1.92176 |
| chr10, mir-107   | 2.00421 | 2.14193 | 2.43298 | 1.09632 | 2.34702 | 1.67053 | 2.05193 | 1.95088 |
| chr10, mir-607   | 1.89938 | 2.01773 | 2.54866 | 1.09392 | 2.28608 | 2.0067  | 2.12856 | 1.89938 |
| chr10, mir-608   | 1.86653 | 2.03331 | 2.47909 | 1.85198 | 2.34008 | 1.96264 | 2.17256 | 1.92744 |
| chr10, mir-146b  | 1.84177 | 2.0079  | 2.45081 | 1.87984 | 2.295   | 1.70048 | 2.16306 | 1.87855 |
| chr10, mir-609   | 1.92204 | 2.04867 | 2.44345 | 1.83044 | 2.2608  | 1.99637 | 2.03451 | 1.8992  |
| chr10, mir-202   | 1.90073 | 1.8422  | 2.28415 | 1.78878 | 2.22268 | 1.88098 | 1.99854 | 2.02902 |
| chr11, mir-210   | 1.81636 | 1.90182 | 2.47727 | 1.80409 | 1.91659 | 1.91523 | 2.10795 | 1.95591 |
| chr11, mir-483   | 1.77121 | 1.86712 | 2.50197 | 1.76773 | 1.75318 | 1.93864 | 2.04    | 1.97985 |
| chr11, mir-610   | 2.13547 | 2.17698 | 2.42583 | 1.86799 | 1.64834 | 2.09791 | 1.97712 | 1.92072 |
| chr11, mir-129-  | 1.92734 | 2.08923 | 2.51944 | 1.84462 | 1.80846 | 2.01063 | 2.04636 | 1.93517 |
| chr11, mir-130a  | 1.86218 | 1.98218 | 2.5854  | 1.81736 | 1.78931 | 1.98218 | 2.16563 | 1.92506 |
| chr11, mir-611   | 1.85487 | 1.9359  | 2.46248 | 1.84282 | 1.84009 | 1.94282 | 2.06906 | 1.92094 |
| chr11, mir-192,  | 1.81931 | 2.03172 | 2.5681  | 1.8719  | 1.83879 | 1.90552 | 2.1581  | 1.94379 |
| chr11, mir-612   | 1.89701 | 2.03558 | 2.62597 | 1.8439  | 1.73909 | 1.96546 | 2.17766 | 1.88104 |
| chr11, MALAT1    | 1.83918 | 1.96041 | 2.66898 | 1.82908 | 1.70245 | 1.95888 | 2.13327 | 1.89704 |
| chr11, mir-139   | 1.83458 | 2.11096 | 1.74325 | 1.87627 | 1.95831 | 1.92241 | 2.21048 | 1.92964 |
| chr11, mir-326   | 1.83917 | 2.16792 | 1.69514 | 1.88819 | 1.96542 | 1.92236 | 2.17264 | 1.91389 |
| chr11, PIWIL4    | 2.02637 | 2.05871 | 1.53376 | 1.83708 | 1.74048 | 2.04068 | 2.02173 | 1.94288 |
| chr11, mir-34b,  | 1.91897 | 2.00356 | 2.6513  | 1.8139  | 2.25493 | 1.99897 | 2.04726 | 1.91952 |
| chr11, mir-125b  | 1.98637 | 2.09321 | 2.65964 | 1.82012 | 2.33923 | 2.05399 | 1.94173 | 1.88226 |
| chr11, let-7a-2, | 2.00027 | 2.19203 | 2.65725 | 1.83148 | 2.37181 | 2.06214 | 1.97654 | 1.90192 |

|                 |         |         |         |         |         |         |         |         |
|-----------------|---------|---------|---------|---------|---------|---------|---------|---------|
| chr12, mir-200c | 2.05785 | 2.00355 | 2.83075 | 2.40215 | 2.32935 | 1.91654 | 2.16626 | 1.86178 |
| chr12, mir-613  | 2.21012 | 2.0237  | 2.84691 | 2.4363  | 2.34123 | 1.97741 | 2.08309 | 1.85716 |
| chr12, mir-614  | 2.14877 | 2.03675 | 2.7964  | 2.34009 | 2.39009 | 1.95763 | 2.0807  | 1.89482 |
| chr12, mir-196a | 2.02065 | 1.86234 | 2.65869 | 2.30579 | 2.26243 | 2.14271 | 1.97327 | 1.87449 |
| chr12, mir-615  | 2.0668  | 1.88123 | 2.83262 | 2.3891  | 2.35049 | 2.14672 | 2.02385 | 1.97385 |
| chr12, mir-148b | 2.03856 | 1.91492 | 2.79458 | 2.29958 | 2.23339 | 2.15992 | 2.05381 | 1.85907 |
| chr12, mir-616  | 2.02858 | 1.85808 | 2.73162 | 2.28414 | 2.23242 | 2.15232 | 2.00909 | 1.80495 |
| chr12, mir-26a- | 2.04478 | 1.85409 | 2.71226 | 2.27791 | 2.24904 | 2.17644 | 2.01557 | 1.84878 |
| chr12, let-7i   | 2.31741 | 1.94568 | 2.57914 | 2.41426 | 2.15858 | 2.33549 | 1.85512 | 1.8421  |
| chr12, mir-548c | 2.17483 | 1.98867 | 2.68317 | 2.35983 | 2.17159 | 2.30425 | 1.94442 | 1.82517 |
| chr12, mir-617  | 2.39934 | 2.08475 | 2.58    | 2.46883 | 2.20379 | 2.38015 | 1.96204 | 1.89234 |
| chr12, mir-618  | 2.42104 | 2.06352 | 2.54889 | 2.47007 | 2.18207 | 2.39545 | 1.92876 | 1.91717 |
| chr12, mir-492  | 2.20794 | 2.10574 | 2.97485 | 2.46926 | 2.27382 | 2.32015 | 2.07897 | 1.87235 |
| chr12, mir-331  | 2.25695 | 1.9674  | 2.96122 | 2.46336 | 2.2384  | 2.35244 | 2.00504 | 1.87641 |
| chr12, mir-135a | 2.40013 | 2.135   | 2.7552  | 2.46013 | 2.36473 | 2.39487 | 1.972   | 1.88307 |
| chr12, mir-619  | 2.15371 | 1.94629 | 2.84672 | 2.38302 | 2.39052 | 2.29414 | 2.10362 | 1.87715 |
| chr12, mir-620  | 2.3598  | 2.11765 | 2.84731 | 2.52571 | 2.22544 | 2.39    | 1.99215 | 1.86342 |
| chr12, PIWIL1   | 2.28702 | 2.06761 | 2.70189 | 2.37067 | 2.29672 | 2.36408 | 1.94845 | 1.88597 |
| chr12, RAN      | 2.19487 | 1.9709  | 2.66654 | 2.30218 | 2.2859  | 2.34718 | 1.97692 | 1.84064 |
| chr13, mir-621  | 1.67629 | 1.96081 | 1.62242 | 2.23742 | 1.80597 | 2.01629 | 2.15065 | 1.26597 |
| chr13, mir-16-1 | 1.67843 | 1.89636 | 1.51231 | 1.06661 | 1.67347 | 2.08512 | 2.15851 | 1.93108 |
| chr13, mir-622  | 2.05315 | 1.96856 | 1.43982 | 2.12207 | 1.56847 | 2.02505 | 1.89459 | 2.61838 |
| chr13, mir-17,  | 1.93399 | 1.97707 | 1.47602 | 2.24782 | 1.53534 | 1.95812 | 2.03684 | 2.57474 |
| chr13, mir-623  | 1.90495 | 1.9602  | 1.56657 | 2.24081 | 1.76354 | 1.99828 | 2.17687 | 2.57737 |
| chr14, mir-208  | 1.84789 | 2.00826 | 2.37239 | 1.83661 | 1.87853 | 1.95606 | 2.11532 | 1.92349 |
| chr14, mir-624  | 1.96417 | 2.06083 | 2.3575  | 1.87286 | 1.70333 | 1.99786 | 2.07131 | 1.89464 |
| chr14, mir-625  | 1.98126 | 1.99586 | 2.49299 | 1.88931 | 1.7108  | 2.0331  | 2.09046 | 1.89644 |
| chr14, Dicer1   | 1.99094 | 2.0755  | 2.44354 | 1.87596 | 1.74523 | 2.03818 | 2.06707 | 1.89862 |
| chr14, mir-342  | 1.89031 | 2.00823 | 2.38761 | 1.86604 | 1.85333 | 1.9649  | 2.11219 | 1.94677 |
| chr14, mir-345  | 1.83778 | 1.95426 | 2.29778 | 1.9063  | 1.89944 | 1.94074 | 2.08426 | 2.00463 |
| chr14, mir-770, | 1.89644 | 2.05433 | 2.33872 | 1.84272 | 1.77899 | 1.95158 | 2.03839 | 1.91151 |
| chr14, mir-379, | 1.8973  | 2.00822 | 2.28935 | 1.81691 | 1.86109 | 1.97874 | 2.0333  | 1.89978 |
| chr14, mir-203  | 1.87235 | 2.03353 | 2.23206 | 1.895   | 1.89882 | 1.89029 | 2.03    | 1.63706 |
| chr15, mir-211  | 1.9251  | 2.13327 | 2.08276 | 1.89377 | 1.90959 | 2.0252  | 2.18918 | 1.94163 |
| chr15, mir-626  | 2.01188 | 2.002   | 2.02553 | 1.852   | 1.71694 | 1.73294 | 1.38059 | 1.93835 |
| chr15, mir-627  | 2.03612 | 2.12357 | 2.02571 | 1.88571 | 1.7549  | 1.69704 | 1.38133 | 1.90031 |
| chr15, mir-628  | 2.06659 | 2.03439 | 1.97015 | 1.80538 | 1.71197 | 1.75015 | 2.0622  | 1.95015 |

|                 |         |         |         |         |         |         |         |         |
|-----------------|---------|---------|---------|---------|---------|---------|---------|---------|
| chr15, mir-190  | 1.94652 | 2.10919 | 2.03222 | 1.83726 | 1.85956 | 2.04237 | 2.07541 | 1.92533 |
| chr15, mir-422a | 1.90044 | 2.07611 | 2.01833 | 1.89589 | 1.90244 | 2.00133 | 2.17344 | 1.93867 |
| chr15, mir-629  | 1.8924  | 2.01192 | 1.96456 | 1.86832 | 1.91536 | 1.99064 | 2.17736 | 1.9708  |
| chr15, mir-630  | 2.03391 | 1.97565 | 1.99556 | 1.86217 | 1.78748 | 2.10487 | 2.07226 | 1.91843 |
| chr15, mir-631  | 1.92532 | 1.98468 | 2.04646 | 1.92203 | 1.94595 | 2.00329 | 2.12797 | 1.98354 |
| chr15, mir-184  | 1.91741 | 2.00598 | 2.11089 | 1.88795 | 1.86509 | 2.01696 | 2.14339 | 1.9592  |
| chr15, mir-549  | 1.90279 | 2.00405 | 2.06306 | 1.84739 | 1.85865 | 2.0209  | 2.1227  | 1.95748 |
| chr15, mir-7-2  | 1.98429 | 1.96774 | 1.98988 | 1.85381 | 1.82226 | 2.04929 | 2.08476 | 1.97333 |
| chr15, mir-9-3  | 1.86235 | 1.9098  | 1.99745 | 1.85255 | 1.89857 | 1.99153 | 2.10398 | 1.99163 |
| chr16, mir-662  | 1.84615 | 1.97808 | 2.18654 | 2.14    | 1.96962 | 1.90692 | 2.02385 | 2.155   |
| chr16, mir-193b | 1.87022 | 2.01424 | 2.40033 | 2.22196 | 1.79196 | 1.95587 | 2.15956 | 1.90913 |
| chr16, mir-484  | 1.91887 | 2.04044 | 2.46826 | 2.26078 | 1.72357 | 2.00261 | 2.11887 | 1.82974 |
| chr16, mir-138- | 1.87454 | 1.96694 | 2.46824 | 2.22037 | 1.84824 | 1.97444 | 2.16444 | 1.34111 |
| chr16, mir-328  | 1.85531 | 1.95388 | 2.33755 | 2.13439 | 1.86204 | 1.89571 | 2.09929 | 1.57531 |
| chr16, mir-140  | 1.84842 | 1.90561 | 2.45073 | 2.17049 | 1.83561 | 1.94244 | 2.1039  | 1.24951 |
| chr16, mir-768  | 1.93355 | 2.06046 | 2.4823  | 2.29243 | 1.67829 | 2.01507 | 2.09434 | 1.12737 |
| chr17, mir-22   | 1.88733 | 2.07213 | 2.13293 | 1.95    | 1.91293 | 1.944   | 1.6748  | 1.96973 |
| chr17, mir-132, | 1.92762 | 2.03222 | 2.11619 | 1.89603 | 1.90111 | 2.00587 | 1.63524 | 2.0073  |
| chr17, mir-195, | 1.95146 | 2.12738 | 2.10835 | 1.91748 | 1.93252 | 2.02233 | 1.58087 | 1.9634  |
| chr17, mir-324  | 1.8742  | 2.10652 | 2.14795 | 1.92964 | 1.87214 | 1.96991 | 1.6367  | 2.00991 |
| chr17, mir-33b  | 1.93181 | 2.01889 | 2.04958 | 1.95556 | 1.99    | 1.96153 | 2.53458 | 2.05528 |
| chr17, mir-451, | 1.85333 | 1.98981 | 2.0637  | 1.84963 | 1.82407 | 1.91981 | 2.1737  | 1.89482 |
| chr17, mir-423  | 1.99705 | 2.0501  | 2.00021 | 1.86263 | 1.71495 | 2.0461  | 2.06295 | 1.86947 |
| chr17, mir-193a | 1.87855 | 2.00782 | 2.05581 | 1.8321  | 1.8354  | 1.97427 | 2.11806 | 1.94613 |
| chr17, mir-632  | 1.96106 | 1.96044 | 2.06611 | 1.86053 | 1.74752 | 2.02469 | 2.10558 | 1.91982 |
| chr17, mir-152  | 1.84176 | 2.01204 | 2.05574 | 1.85019 | 1.82731 | 1.9625  | 2.12306 | 1.97046 |
| chr17, mir-10a  | 1.85008 | 1.95424 | 2.0267  | 2.00975 | 1.86525 | 1.94839 | 2.03864 | 2.0572  |
| chr17, mir-196a | 1.84539 | 1.98706 | 2.00716 | 1.82667 | 1.79108 | 1.95833 | 2.04863 | 1.92029 |
| chr17, mir-142  | 1.89073 | 2.09305 | 2.00159 | 1.92183 | 1.90085 | 1.91585 | 2.14817 | 1.92366 |
| chr17, mir-454, | 1.97667 | 2.01933 | 1.97785 | 1.81244 | 1.72622 | 2.0277  | 2.05333 | 1.87785 |
| chr17, mir-21   | 1.94789 | 2.08009 | 2.04697 | 1.84165 | 1.70606 | 2.01183 | 2.12835 | 1.86073 |
| chr17, mir-633  | 1.97372 | 2.08064 | 1.99154 | 1.79449 | 1.75949 | 2.03615 | 2.05513 | 1.88128 |
| chr17, mir-634  | 1.93513 | 1.99479 | 2.01034 | 1.81882 | 1.83092 | 2.0142  | 2.01714 | 1.91622 |
| chr17, mir-548c | 1.92562 | 2.00742 | 2.05393 | 1.81933 | 1.80584 | 2.0264  | 2.10685 | 1.85124 |
| chr17, mir-635  | 1.88322 | 2.05356 | 2.08253 | 1.83552 | 1.77908 | 1.98908 | 2.15897 | 1.88862 |
| chr17, mir-636  | 1.92425 | 1.95814 | 1.97903 | 1.80142 | 1.74407 | 1.98124 | 2.0423  | 1.91814 |
| chr17, mir-657, | 1.8322  | 1.87561 | 1.9778  | 2.10366 | 1.96805 | 1.89439 | 2.01634 | 2.1661  |



|                 |         |         |         |         |         |         |         |         |
|-----------------|---------|---------|---------|---------|---------|---------|---------|---------|
| chr18, mir-133a | 2.01104 | 2.0266  | 1.92896 | 1.81722 | 1.62375 | 2.44215 | 3.5775  | 1.85625 |
| chr18, mir-187  | 1.93246 | 1.97899 | 1.90478 | 1.82493 | 1.71232 | 2.37942 | 3.42565 | 1.91783 |
| chr18, mir-122a | 1.866   | 2.0047  | 2.0116  | 1.8305  | 1.7925  | 2.0103  | 3.6192  | 1.9126  |
| chr19, mir-637  | 1.88385 | 1.94026 | 2.1041  | 1.89846 | 1.86359 | 1.96    | 2.05282 | 2.00282 |
| chr19, mir-7-3  | 1.8404  | 2.0106  | 2.0956  | 1.8706  | 1.88    | 1.9076  | 2.1738  | 1.8954  |
| chr19, mir-638  | 1.86178 | 2.04933 | 2.10244 | 1.87311 | 1.79467 | 1.92978 | 2.18222 | 1.92067 |
| chr19, mir-199a | 1.86039 | 2.05941 | 2.09137 | 1.87706 | 1.85392 | 1.92922 | 2.1849  | 1.89804 |
| chr19, mir-24-2 | 1.8725  | 1.95019 | 2.04558 | 1.87462 | 1.87154 | 1.94058 | 2.08635 | 1.97923 |
| chr19, mir-181c | 1.85418 | 2.06182 | 2.13364 | 1.91764 | 1.90073 | 1.85218 | 2.13055 | 1.95964 |
| chr19, mir-639  | 1.8712  | 1.9916  | 2.1268  | 1.86933 | 1.82147 | 1.99773 | 2.12107 | 1.9644  |
| chr19, mir-640  | 1.90106 | 2.02279 | 2.10404 | 1.85587 | 1.84058 | 1.99635 | 2.19635 | 1.93923 |
| chr19, mir-641  | 1.89055 | 2.07655 | 1.70236 | 2.39782 | 1.90964 | 1.97564 | 2.11491 | 1.89436 |
| chr19, mir-330  | 1.84163 | 2.08122 | 1.69327 | 1.86796 | 1.83429 | 1.92694 | 2.72918 | 1.90959 |
| chr19, mir-642  | 1.82377 | 1.98321 | 1.6783  | 1.82396 | 1.79075 | 1.8817  | 2.7134  | 1.87868 |
| chr19, mir-769  | 1.86526 | 2.11053 | 1.67439 | 1.9021  | 1.85912 | 1.91754 | 2.66509 | 1.9214  |
| chr19, mir-150  | 1.8854  | 2.00508 | 1.6754  | 1.88556 | 1.84048 | 1.92032 | 2.70746 | 1.95635 |
| chr19, mir-99b  | 1.92257 | 2.16643 | 1.689   | 1.93271 | 1.819   | 1.93786 | 2.61    | 1.93857 |
| chr19, mir-643  | 2.02063 | 2.04797 | 1.62152 | 2.07443 | 1.8138  | 2.05329 | 2.77165 | 2.06456 |
| chr19, mir-512- | 1.94742 | 2.09469 | 1.61438 | 1.81139 | 1.86742 | 2.00031 | 2.71515 | 1.89242 |
| chr20, mir-103- | 1.86291 | 1.96231 | 1.95803 | 1.7941  | 1.73171 | 1.94521 | 2.04453 | 1.85957 |
| chr20, mir-663  | 2.08269 | 2.20462 | 1.865   | 1.81615 | 1.75231 | 1.97462 | 1.91846 | 1.96    |
| chr20, mir-644  | 1.91157 | 1.9625  | 1.97676 | 1.78991 | 1.64009 | 1.9863  | 2.02982 | 1.83741 |
| chr20, mir-499  | 1.84253 | 1.94253 | 1.9676  | 1.806   | 1.8724  | 1.8948  | 2.0776  | 1.88293 |
| chr20, mir-645  | 1.84402 | 1.98224 | 2.01729 | 1.81019 | 1.77215 | 1.95037 | 2.08869 | 1.8872  |
| chr20, mir-296  | 1.81263 | 2.04558 | 2.06326 | 1.82253 | 1.81884 | 1.94116 | 2.12737 | 1.90463 |
| chr20, mir-646  | 1.90714 | 2.02888 | 1.93429 | 1.77398 | 1.79745 | 2.02367 | 1.98612 | 1.88296 |
| chr20, mir-1-1, | 1.81406 | 1.93344 | 1.99328 | 1.83453 | 1.87062 | 1.89031 | 2.01563 | 1.94516 |
| chr20, mir-124a | 1.81196 | 1.97161 | 2.01036 | 1.8175  | 1.92679 | 1.86929 | 2.08161 | 1.88768 |
| chr20, mir-647  | 1.82038 | 1.84173 | 1.97538 | 1.78346 | 1.85327 | 1.90077 | 2.06481 | 1.91269 |
| chr21, mir-99a, | 2.12984 | 2.26806 | 2.33713 | 2.29488 | 1.73093 | 2.48651 | 1.97721 | 1.94178 |
| chr21, mir-125b | 2.14543 | 2.17068 | 2.28333 | 2.30117 | 1.71951 | 2.51802 | 1.9079  | 1.94395 |
| chr21, mir-155  | 2.02352 | 2.13276 | 2.38483 | 2.28469 | 1.73021 | 2.46297 | 2.1191  | 1.93434 |
| chr21, mir-802  | 1.93798 | 2.0371  | 2.43847 | 2.19347 | 1.7671  | 2.34089 | 2.05548 | 1.90863 |
| chr22, mir-648  | 1.90243 | 2.05797 | 2.52081 | 1.87986 | 1.85338 | 1.96676 | 2.2427  | 1.91973 |
| chr22, mir-185  | 1.888   | 1.95872 | 2.33186 | 1.839   | 2.43357 | 1.946   | 2.12429 | 2.00414 |
| chr22, DGCR8-   | 1.86562 | 1.93839 | 2.34    | 1.83553 | 2.32339 | 1.95643 | 2.115   | 1.94982 |
| chr22, mir-649  | 1.90511 | 2.02234 | 2.30043 | 1.92213 | 1.95681 | 1.93042 | 2.06447 | 2.02489 |

|                   |          |          |         |          |          |          |          |          |
|-------------------|----------|----------|---------|----------|----------|----------|----------|----------|
| chr22, mir-130b   | 1.90526  | 2.02579  | 2.39982 | 1.88333  | 1.85193  | 1.97246  | 2.11719  | 1.93702  |
| chr22, mir-650    | 2.18462  | 2.37321  | 1.91167 | 0.526026 | 2.06385  | 2.25923  | 0.911795 | 2.18487  |
| chr22, PIWIL3     | 1.94682  | 2.02261  | 2.4609  | 1.84526  | 1.78981  | 2.00156  | 2.08493  | 1.87659  |
| chr22, mir-658,   | 1.87063  | 2.05152  | 2.54506 | 1.86582  | 1.84354  | 1.9381   | 2.1957   | 1.91975  |
| chr22, mir-33     | 1.87847  | 1.81722  | 2.42889 | 1.86264  | 1.84944  | 1.98236  | 2.12861  | 1.96611  |
| chr22, let-7a-3,  | 1.9351   | 1.92333  | 2.2598  | 2.05078  | 1.99686  | 1.91608  | 2.11137  | 2.08882  |
| chrX, mir-651     | 0.98664  | 1.06696  | 1.67936 | 0.92992  | 1.46936  | 1.34816  | 1.1836   | 1.57936  |
| chrX, mir-221,    | 0.985283 | 1.1233   | 1.9217  | 0.905    | 1.37491  | 1.3584   | 1.19189  | 1.595    |
| chrX, mir-532,    | 0.966052 | 1.02447  | 1.91737 | 0.91079  | 1.35342  | 1.27421  | 1.1536   | 1.4664   |
| chrX, mir-98, let | 0.933237 | 1.04014  | 2.3318  | 0.907122 | 1.36763  | 1.25432  | 1.20094  | 1.53374  |
| chrX, mir-223     | 0.972187 | 1.05531  | 2.33773 | 0.924454 | 1.41773  | 1.34539  | 1.17813  | 1.61539  |
| chrX, mir-421     | 1.00071  | 1.07908  | 2.26439 | 0.932857 | 1.38857  | 1.3199   | 1.18357  | 1.6101   |
| chrX, mir-545,    | 0.975935 | 1.04764  | 2.27366 | 0.904959 | 1.38512  | 1.3465   | 1.19789  | 1.61455  |
| chrX, mir-384     | 0.979643 | 1.04268  | 2.24518 | 0.91     | 1.36018  | 1.35446  | 1.13714  | 1.58464  |
| chrX, mir-325     | 0.973409 | 1.01136  | 2.26636 | 0.905227 | 1.37432  | 1.35909  | 1.17273  | 1.5625   |
| chrX, mir-361     | 1.03419  | 1.0829   | 2.18409 | 0.930538 | 1.35968  | 1.04022  | 1.12355  | 1.66258  |
| chrX, mir-652     | 0.955701 | 1.03794  | 2.23533 | 0.900655 | 1.43626  | 1.00897  | 1.20495  | 1.6315   |
| chrX, mir-448     | 1.03213  | 1.043    | 2.22462 | 0.913125 | 1.41838  | 1.03125  | 1.15287  | 1.65475  |
| chrX, mir-766     | 0.916957 | 1.0475   | 2.46793 | 0.917391 | 1.37283  | 0.945543 | 1.26043  | 1.44739  |
| chrX, mir-220     | 0.956098 | 1.01415  | 2.2539  | 0.905366 | 1.40561  | 1.0122   | 1.17805  | 1.56732  |
| chrX, mir-363,    | 0.956538 | 0.974615 | 2.25361 | 0.890462 | 1.37485  | 0.976539 | 1.17438  | 1.63269  |
| chrX, mir-450-1   | 0.94     | 0.994924 | 2.26333 | 0.889016 | 1.33477  | 0.972576 | 1.18197  | 1.56091  |
| chrX, mir-504     | 1.02377  | 1.05669  | 2.17216 | 0.879155 | 1.37054  | 1.02977  | 1.13623  | 1.64323  |
| chrX, mir-505     | 0.958242 | 0.986374 | 2.20022 | 0.878022 | 1.36934  | 1.01505  | 1.16022  | 1.61549  |
| chrX, mir-513-1   | 1.00505  | 1.06783  | 2.25557 | 0.89799  | 0.234794 | 1.01088  | 1.15613  | 1.60897  |
| chrX, FMR1        | 0.991171 | 1.00805  | 2.23631 | 0.898864 | 0.258546 | 1.00142  | 1.12872  | 1.59426  |
| chrX, mir-224,    | 0.943023 | 1.06985  | 2.28132 | 0.906356 | 1.4007   | 0.977752 | 1.17349  | 0.94907  |
| chrX, mir-105-1   | 1.00122  | 1.099    | 2.29422 | 0.909889 | 1.44545  | 0.992111 | 1.18933  | 0.909333 |

| TUMOR ID        | 1326    | 1423    | 1750    | 2202    | 2633    | 3279    | 3416    | 3717    |
|-----------------|---------|---------|---------|---------|---------|---------|---------|---------|
| MiRNA ID        |         |         |         |         |         |         |         |         |
| chr1, mir-200b, | 2.14698 | 2.02465 | 2.41395 | 1.94628 | 1.65628 | 1.6093  | 1.91744 | 2.03791 |
| chr1, mir-551a  | 2.37194 | 2.02839 | 2.33903 | 2.00516 | 1.75452 | 1.59    | 1.96742 | 2.12387 |
| chr1, mir-34a   | 1.92893 | 2.03987 | 2.36907 | 1.78107 | 1.78947 | 1.2688  | 1.96107 | 2.03867 |
| chr1, mir-801   | 1.78476 | 2.01905 | 1.42619 | 1.69238 | 1.80452 | 1.17024 | 1.9569  | 1.96786 |
| chr1, mir-552   | 1.86662 | 2.00805 | 2.25104 | 1.77013 | 1.78468 | 1.2874  | 2.03727 | 2.03039 |
| chr1, AGO4, A   | 1.73973 | 2.01955 | 2.11143 | 1.71271 | 1.79162 | 1.12763 | 1.98241 | 1.99114 |

|                 |         |         |         |         |         |         |         |         |
|-----------------|---------|---------|---------|---------|---------|---------|---------|---------|
| chr1, mir-30e,  | 1.78199 | 2.01471 | 2.21603 | 2.21265 | 1.7875  | 1.20294 | 1.98029 | 2.01375 |
| chr1, mir-101-1 | 1.76214 | 2.03413 | 2.16389 | 2.26389 | 1.82587 | 1.17556 | 2.04556 | 2.035   |
| chr1, SERBP1    | 1.7556  | 2.03054 | 2.12174 | 2.27174 | 1.81043 | 1.18321 | 2.0306  | 2.01255 |
| chr1, mir-186   | 1.84362 | 2.05342 | 2.03101 | 2.32718 | 1.89772 | 1.19007 | 2.16953 | 2.06134 |
| chr1, mir-137   | 1.80301 | 2.08261 | 1.98847 | 1.76858 | 1.86455 | 1.17608 | 2.13199 | 2.03841 |
| chr1, mir-553   | 1.74288 | 2.01464 | 2.13536 | 1.17056 | 1.79656 | 1.16992 | 2.06392 | 2.00784 |
| chr1, mir-197   | 1.72865 | 2.02135 | 2.12915 | 1.15964 | 1.80425 | 1.17865 | 2.0456  | 1.97695 |
| chr1, DDX20     | 1.78859 | 2.00016 | 2.23627 | 1.22005 | 1.81643 | 1.27427 | 2.05189 | 2.03081 |
| chr1, mir-554   | 2.07762 | 1.94607 | 2.8706  | 2.56036 | 2.19905 | 2.48143 | 1.89024 | 1.96357 |
| chr1, mir-92b   | 2.2513  | 1.94759 | 3.15417 | 2.1238  | 2.09843 | 2.24407 | 1.89028 | 1.99213 |
| chr1, mir-555   | 2.02089 | 1.95125 | 2.99072 | 2.15955 | 2.24205 | 2.21214 | 1.91509 | 1.89491 |
| chr1, mir-9-1   | 2.10701 | 1.93638 | 3.16953 | 2.14654 | 2.21039 | 2.2574  | 1.91236 | 1.95165 |
| chr1, mir-765   | 2.20018 | 1.95405 | 3.07892 | 2.17351 | 2.19577 | 2.33504 | 1.91919 | 1.96973 |
| chr1, mir-556   | 2.08664 | 1.94803 | 2.89336 | 2.14321 | 2.27621 | 2.32569 | 1.95942 | 1.92277 |
| chr1, mir-557   | 2.06063 | 1.93244 | 2.84772 | 2.61819 | 2.24693 | 2.39205 | 1.96457 | 1.93653 |
| chr1, mir-214,  | 2.03651 | 1.94882 | 2.01974 | 2.71333 | 2.33179 | 2.44426 | 2.01128 | 1.94872 |
| chr1, mir-488   | 2.14376 | 1.97418 | 2.11574 | 2.72908 | 2.34702 | 2.76043 | 2.0217  | 2.02752 |
| chr1, mir-181b- | 1.99831 | 1.92676 | 1.89514 | 3.88926 | 2.3627  | 2.72953 | 1.99912 | 1.97763 |
| chr1, mir-135b  | 2.17459 | 1.95459 | 2.38429 | 3.63255 | 1.76755 | 2.63347 | 1.92673 | 2.00408 |
| chr1, mir-29c,  | 2.13069 | 1.97362 | 2.21425 | 3.85113 | 1.77762 | 2.77738 | 1.99912 | 2.01056 |
| chr1, mir-205   | 2.2033  | 1.98376 | 2.20523 | 3.84954 | 1.81651 | 2.86046 | 2.04963 | 2.01486 |
| chr1, mir-215,  | 2.06033 | 1.96508 | 2.01033 | 3.31672 | 1.80738 | 2.63688 | 2.01606 | 1.96066 |
| chr2, mir-558   | 1.67409 | 1.98345 | 1.98073 | 1.13491 | 1.75236 | 1.83036 | 1.97727 | 1.93682 |
| chr2, mir-559   | 1.70702 | 1.97255 | 2.16298 | 2.21521 | 1.75979 | 1.84734 | 1.98032 | 1.97372 |
| chr2, mir-217,  | 1.76739 | 1.94067 | 1.98985 | 2.19261 | 1.77709 | 2.77119 | 2.01627 | 2.04351 |
| chr2, mir-560   | 1.70778 | 2.32    | 2.60222 | 1.85111 | 1.99444 | 2.05667 | 2.16778 | 2.24444 |
| chr2, mir-128a  | 1.7309  | 2.03128 | 2.02752 | 1.70722 | 1.83338 | 1.83985 | 2.0285  | 1.99985 |
| chr2, mir-10b   | 1.85218 | 2.03647 | 2.3558  | 1.74269 | 1.80941 | 2.0621  | 2.04874 | 2.04824 |
| chr2, mir-561   | 1.8541  | 2.10166 | 2.01101 | 1.77122 | 1.87288 | 1.99439 | 2.14029 | 2.0859  |
| chr2, mir-26b   | 2.01898 | 1.96678 | 2.36153 | 1.42542 | 1.84848 | 1.95559 | 1.94898 | 2.03746 |
| chr2, mir-375   | 2.0071  | 1.98333 | 2.41925 | 1.34839 | 1.77936 | 1.99968 | 1.96269 | 2.03237 |
| chr2, mir-153-1 | 2.03705 | 1.98487 | 2.34423 | 1.33256 | 1.81192 | 2.00756 | 1.95923 | 2.03782 |
| chr2, mir-562   | 1.7385  | 2.02717 | 2.12883 | 1.72967 | 1.79567 | 1.96317 | 2.00883 | 1.99117 |
| chr2, mir-149   | 2.0005  | 2.0125  | 2.342   | 1.92075 | 1.87125 | 2.00725 | 1.982   | 2.008   |
| chr3, mir-563   | 1.75476 | 2.48302 | 2.13079 | 1.70222 | 1.79444 | 1.90429 | 2.03619 | 1.98571 |
| chr3, mir-128b  | 1.78598 | 2.59915 | 2.07884 | 1.7186  | 1.84555 | 1.8489  | 2.11378 | 2.04213 |
| chr3, mir-26a-1 | 1.76105 | 2.49306 | 2.18693 | 1.72508 | 1.8221  | 1.85814 | 2.01653 | 2.00274 |

|                  |         |         |         |         |         |         |         |         |
|------------------|---------|---------|---------|---------|---------|---------|---------|---------|
| chr3, mir-138-1  | 1.85762 | 2.52492 | 2.31421 | 1.73865 | 1.79341 | 1.86174 | 2.06206 | 1.99905 |
| chr3, mir-564    | 1.81815 | 2.53228 | 2.2575  | 1.73717 | 1.83935 | 1.84565 | 2.06446 | 2.03804 |
| chr3, mir-565    | 1.78274 | 2.56822 | 2.14936 | 1.73234 | 1.82694 | 1.81032 | 2.02629 | 2.03565 |
| chr3, mir-425, l | 1.96626 | 2.46697 | 2.47525 | 1.7705  | 1.80687 | 1.82768 | 1.95798 | 2.07414 |
| chr3, mir-566    | 1.9222  | 2.36458 | 1.70356 | 1.84542 | 1.87254 | 1.82814 | 1.92729 | 2.07932 |
| chr3, let-7g, mi | 1.84851 | 2.45657 | 1.49431 | 1.76287 | 1.79558 | 1.85569 | 1.99464 | 2.02663 |
| chr3, mir-567    | 1.75584 | 2.48606 | 2.15803 | 1.74818 | 1.80029 | 2.05058 | 2.06547 | 2.03832 |
| chr3, mir-568    | 1.73293 | 2.47274 | 2.14962 | 1.71561 | 1.78573 | 2.03764 | 2.07516 | 2.00166 |
| chr3, mir-198    | 1.76336 | 2.48736 | 2.16128 | 1.7236  | 1.79264 | 1.96296 | 2.04456 | 2.03624 |
| chr3, mir-15b, l | 1.70916 | 2.4802  | 2.00377 | 1.66084 | 1.78708 | 1.91701 | 2.04214 | 1.95968 |
| chr3, mir-551b   | 1.72175 | 2.5166  | 2.02146 | 1.70068 | 1.83097 | 1.93942 | 2.08621 | 2.00252 |
| chr3, mir-569    | 1.76733 | 2.48482 | 2.0477  | 1.70341 | 1.79859 | 2.01118 | 2.04489 | 1.962   |
| chr3, mir-28     | 1.71763 | 2.46929 | 2.07781 | 1.69248 | 1.78947 | 1.16864 | 1.62148 | 1.96473 |
| chr3, mir-570    | 1.96474 | 2.77421 | 2.12026 | 1.66658 | 1.37263 | 1.46342 | 2.17711 | 2.05158 |
| chr4, mir-571    | 1.79176 | 2.05941 | 1.63412 | 1.81706 | 1.87647 | 1.93471 | 2.05412 | 2.09    |
| chr4, mir-95     | 1.96229 | 2.022   | 1.92214 | 1.854   | 1.83543 | 2.05371 | 2.06771 | 2.07814 |
| chr4, mir-572    | 1.91304 | 2.05101 | 1.70823 | 1.84785 | 1.8919  | 2.19506 | 2.14101 | 2.14152 |
| chr4, mir-218-1  | 1.868   | 2.10297 | 1.51955 | 1.80658 | 1.93155 | 1.98277 | 2.18316 | 2.09568 |
| chr4, mir-573    | 1.81283 | 2.06    | 1.64401 | 1.7715  | 1.85197 | 2.03118 | 2.11984 | 2.05299 |
| chr4, mir-574    | 1.73596 | 1.96121 | 2.21485 | 1.7397  | 1.81747 | 1.94546 | 2.04263 | 1.98283 |
| chr4, mir-575    | 1.87951 | 1.98583 | 2.27505 | 1.76019 | 1.7967  | 1.98699 | 2.02612 | 1.19845 |
| chr4, mir-576    | 1.75922 | 2.03241 | 2.00103 | 1.72069 | 1.82948 | 1.93207 | 2.07543 | 2.00069 |
| chr4, mir-367, l | 1.74348 | 2.01697 | 2.16182 | 1.7147  | 1.82546 | 1.91515 | 2.0478  | 1.10803 |
| chr4, mir-577    | 1.81681 | 2.04494 | 2.00464 | 1.74247 | 1.8706  | 1.99717 | 2.14916 | 1.12994 |
| chr4, mir-578    | 1.79191 | 2.04818 | 2.01635 | 1.74865 | 1.23746 | 1.94476 | 2.11484 | 2.025   |
| chr5, Droscha    | 2.11253 | 1.95572 | 2.09271 | 2.19065 | 2.34487 | 2.57085 | 2.00284 | 1.96837 |
| chr5, mir-579    | 1.99619 | 1.93701 | 1.96898 | 2.15959 | 2.33911 | 2.44769 | 1.95177 | 1.91857 |
| chr5, mir-580    | 2.0756  | 1.9464  | 1.99696 | 2.20824 | 2.33896 | 2.54664 | 1.988   | 1.97808 |
| chr5, mir-581    | 2.12888 | 1.99642 | 2.02515 | 2.25119 | 2.42597 | 2.5944  | 2.04836 | 1.12358 |
| chr5, mir-449, l | 2.07659 | 1.95043 | 2.03188 | 2.21891 | 2.34427 | 2.58355 | 2.00377 | 1.95725 |
| chr5, mir-582    | 2.0955  | 1.96875 | 1.99092 | 2.283   | 2.42067 | 2.58342 | 2.0625  | 1.97017 |
| chr5, mir-9-2    | 2.11956 | 1.95594 | 2.04194 | 2.21856 | 2.39625 | 2.77156 | 2.06287 | 1.99694 |
| chr5, mir-583    | 2.09579 | 1.94609 | 2.03391 | 2.22083 | 2.35256 | 2.75564 | 2.04504 | 1.99895 |
| chr5, mir-584    | 2.11157 | 1.93434 | 2.12458 | 2.19578 | 2.24386 | 2.64482 | 1.9741  | 1.96494 |
| chr5, mir-143, l | 2.18168 | 1.94822 | 2.32782 | 2.20079 | 2.21455 | 2.59881 | 1.95505 | 1.98634 |
| chr5, mir-378    | 2.15554 | 1.96301 | 2.20952 | 2.17518 | 2.29747 | 2.54771 | 1.94518 | 1.95651 |
| chr5, mir-146a   | 1.75212 | 1.97293 | 2.14343 | 2.16737 | 2.27212 | 1.96646 | 2.00434 | 1.97899 |

|                  |         |         |         |         |         |         |         |         |
|------------------|---------|---------|---------|---------|---------|---------|---------|---------|
| chr5, mir-103-1  | 2.11924 | 1.98098 | 2.09515 | 2.20561 | 2.34348 | 1.89507 | 2.02212 | 1.9675  |
| chr5, mir-218-2  | 2.19729 | 1.97944 | 2.27084 | 2.18869 | 2.30608 | 1.93981 | 1.98692 | 2.02299 |
| chr5, mir-585    | 2.14854 | 1.93382 | 2.19664 | 2.17764 | 2.27746 | 2.01391 | 1.99536 | 1.99046 |
| chr5, mir-340    | 2.06323 | 1.95108 | 2.57118 | 2.19828 | 2.28387 | 1.86194 | 1.94871 | 1.9486  |
| chr6, mir-548a-  | 2.10041 | 1.96423 | 2.08252 | 2.7478  | 1.79748 | 1.84732 | 2.00862 | 1.96967 |
| chr6, mir-219-1  | 2.22794 | 1.95082 | 1.6333  | 2.63381 | 1.72536 | 1.99196 | 1.92546 | 2.00938 |
| chr6, XPO5       | 2.07372 | 1.96414 | 2.23631 | 2.69266 | 1.74529 | 1.89375 | 1.92811 | 1.93897 |
| chr6, mir-586    | 2.105   | 2.00371 | 1.95328 | 2.82474 | 1.83233 | 1.90362 | 2.05465 | 2.04026 |
| chr6, mir-206, 1 | 2.07928 | 1.93791 | 2.10094 | 2.70712 | 1.73209 | 2.00108 | 1.98    | 1.96648 |
| chr6, mir-30c-2  | 1.77723 | 2.04951 | 1.21523 | 1.77799 | 1.85905 | 2.04886 | 2.10307 | 2.07659 |
| chr6, mir-587    | 1.87964 | 2.01655 | 1.41445 | 1.77991 | 1.26945 | 1.26291 | 2.06755 | 2.06918 |
| chr6, mir-548b   | 1.82708 | 2.04266 | 1.29398 | 1.78575 | 1.88947 | 1.19752 | 2.13265 | 2.07451 |
| chr6, mir-588    | 1.79016 | 2.07869 | 1.20656 | 1.77033 | 1.90475 | 1.19131 | 2.18    | 2.08951 |
| chr6, mir-548a-  | 1.82528 | 2.03504 | 1.37142 | 1.7926  | 1.25221 | 1.25315 | 2.08622 | 2.08252 |
| chr7, mir-339    | 2.04211 | 1.95658 | 2.32921 | 2.10026 | 1.79632 | 1.88579 | 1.85868 | 1.945   |
| chr7, mir-589    | 2.00608 | 1.89157 | 2.31745 | 2.08745 | 1.72333 | 1.83059 | 1.81    | 1.92255 |
| chr7, mir-148a   | 1.65969 | 1.90094 | 2.14354 | 2.13948 | 1.69115 | 1.91156 | 1.91115 | 1.90771 |
| chr7, mir-196b   | 1.70094 | 1.95469 | 2.32083 | 2.15271 | 1.72729 | 1.8549  | 1.93031 | 1.91052 |
| chr7, mir-550-1  | 1.62679 | 1.94025 | 2.03259 | 2.13506 | 1.71617 | 1.85358 | 1.94531 | 1.89259 |
| chr7, has-mir-5  | 1.66000 | 1.92000 | 2.00000 | 2.11000 | 1.75000 | 1.94000 | 1.93000 | 1.92000 |
| chr7, mir-590    | 1.66839 | 1.9129  | 2.07914 | 2.06355 | 1.67462 | 1.70022 | 1.80925 | 1.86258 |
| chr7, mir-653, 1 | 1.64387 | 1.84694 | 1.84369 | 2.07156 | 1.69819 | 1.88856 | 1.947   | 1.86494 |
| chr7, mir-591    | 1.68992 | 1.9276  | 1.94104 | 2.14824 | 1.71584 | 1.84888 | 1.97488 | 1.8876  |
| chr7, mir-25, m  | 1.77425 | 1.8308  | 2.27266 | 2.02027 | 1.59239 | 1.84044 | 1.79088 | 1.86292 |
| chr7, mir-592    | 1.71338 | 1.91008 | 1.19785 | 2.15946 | 1.73223 | 1.94839 | 1.98931 | 1.93962 |
| chr7, SDN1, m    | 1.69461 | 1.92083 | 1.2694  | 2.13893 | 1.71539 | 1.91658 | 1.94322 | 1.90842 |
| chr7, mir-129-1  | 1.7773  | 1.91494 | 1.42674 | 2.11506 | 1.6973  | 1.91382 | 1.90236 | 1.9209  |
| chr7, mir-182, 1 | 1.87808 | 1.9197  | 1.48667 | 2.11667 | 1.75869 | 1.91343 | 1.87081 | 1.96909 |
| chr7, mir-335    | 1.71461 | 1.94883 | 1.2718  | 2.09227 | 1.75094 | 1.84445 | 1.90687 | 1.91977 |
| chr7, mir-29a, 1 | 1.66411 | 1.93    | 1.28937 | 2.12874 | 1.70084 | 1.85011 | 1.91821 | 1.932   |
| chr7, mir-490    | 1.71479 | 1.93148 | 1.94982 | 2.17633 | 1.75834 | 1.85355 | 2.00911 | 1.94621 |
| chr7, has-mir-5  | 1.70119 | 1.94869 | 2.12536 | 2.11405 | 1.71238 | 1.83309 | 1.88417 | 1.89845 |
| chr7, mir-671    | 1.87433 | 1.94173 | 2.24385 | 2.07971 | 1.72856 | 1.90731 | 1.87067 | 1.9549  |
| chr7, mir-153-2  | 1.70895 | 1.90919 | 2.2714  | 2.11407 | 1.72256 | 1.95465 | 1.94267 | 1.90465 |
| chr7, mir-595    | 1.88383 | 1.91728 | 2.28704 | 2.11235 | 1.7079  | 1.85247 | 1.89185 | 1.95531 |
| chr8, mir-596    | 1.92739 | 2.16333 | 1.49464 | 1.82101 | 1.92478 | 2.66145 | 2.13406 | 2.12812 |
| chr8, mir-597    | 1.8111  | 2.07407 | 1.70035 | 1.78186 | 1.87097 | 2.758   | 2.13359 | 2.05648 |

|                 |         |         |         |         |         |         |         |         |
|-----------------|---------|---------|---------|---------|---------|---------|---------|---------|
| chr8, mir-124a- | 1.87509 | 2.04303 | 1.85321 | 1.78152 | 1.825   | 2.77295 | 2.08884 | 2.04455 |
| chr8, mir-598   | 1.89885 | 2.01299 | 1.99368 | 1.80575 | 1.80563 | 2.74195 | 2.01563 | 2.07011 |
| chr8, mir-383   | 1.88964 | 2.12691 | 1.70509 | 1.80727 | 1.937   | 2.78946 | 2.22355 | 2.09855 |
| chr8, mir-320,  | 1.79831 | 2.02643 | 1.3839  | 1.74776 | 1.80113 | 2.61549 | 2.00866 | 2.02189 |
| chr8, mir-486   | 1.96894 | 1.98682 | 2.39494 | 1.81929 | 1.81106 | 2.60553 | 1.97588 | 2.05788 |
| chr8, mir-124a- | 1.81692 | 2.06962 | 1.3216  | 1.76628 | 1.86321 | 2.77327 | 2.14885 | 2.03788 |
| chr8, mir-599   | 1.72027 | 2.01752 | 1.93638 | 1.7249  | 1.23322 | 2.62604 | 2.08302 | 2.05161 |
| chr8, mir-548a- | 1.78008 | 2.03311 | 2.07762 | 1.74385 | 1.23369 | 2.66729 | 2.07852 | 2.02131 |
| chr8, mir-548d- | 1.67425 | 1.94172 | 2.06269 | 1.65396 | 1.76821 | 2.46187 | 1.97552 | 1.91411 |
| chr8, mir-30b,  | 1.69901 | 1.94178 | 2.00678 | 1.69697 | 1.76947 | 2.65243 | 2.03013 | 1.97224 |
| chr8, AGO2      | 1.76861 | 1.95809 | 2.27315 | 1.69367 | 1.7496  | 2.49315 | 1.92978 | 1.97432 |
| chr8, mir-151   | 1.63567 | 1.96725 | 2.07592 | 1.669   | 1.72417 | 2.56975 | 1.94425 | 1.90375 |
| chr8, mir-661   | 2.04    | 2.00162 | 2.33919 | 1.80541 | 2.0227  | 2.24622 | 1.90946 | 1.95919 |
| chr9, mir-101-2 | 2.14404 | 1.99967 | 1.34596 | 1.77146 | 1.8543  | 2.75046 | 2.04583 | 2.03099 |
| chr9, mir-491   | 2.16366 | 1.50463 | 1.28373 | 1.7503  | 1.86179 | 2.01358 | 2.1197  | 1.15485 |
| chr9, mir-31    | 2.16271 | 1.46687 | 1.23771 | 1.77915 | 1.89059 | 2.01339 | 2.15373 | 1.1211  |
| chr9, mir-204   | 2.18832 | 1.43803 | 2.13255 | 1.73818 | 1.8535  | 2.76781 | 2.06869 | 2.0427  |
| chr9, mir-7-1   | 2.14592 | 1.38183 | 2.15467 | 1.70608 | 1.80708 | 2.60858 | 2.03592 | 1.99783 |
| chr9, let-7a-1, | 2.09794 | 1.88186 | 2.18928 | 1.73887 | 1.81588 | 2.60897 | 2.01    | 2.01381 |
| chr9, mir-23b,  | 2.23476 | 1.91914 | 2.31428 | 1.76381 | 1.83286 | 2.69848 | 2.0061  | 2.06686 |
| chr9, mir-32    | 2.1318  | 1.34922 | 2.19492 | 1.72492 | 1.80195 | 2.8357  | 2.03906 | 1.98195 |
| chr9, mir-455   | 2.26362 | 1.87619 | 2.36095 | 1.81257 | 1.78752 | 2.66438 | 1.95562 | 2.04819 |
| chr9, mir-147   | 2.12271 | 1.83854 | 2.20229 | 1.68135 | 2.25958 | 2.71219 | 1.975   | 1.97188 |
| chr9, mir-600   | 2.11788 | 1.86832 | 2.21372 | 1.71022 | 2.32394 | 2.69175 | 1.97847 | 1.98832 |
| chr9, mir-601   | 2.18062 | 1.87115 | 2.34864 | 1.74042 | 2.20052 | 2.65323 | 1.96115 | 1.99854 |
| chr9, mir-181a- | 2.05784 | 1.83966 | 2.06965 | 1.67345 | 2.29664 | 2.65172 | 1.96233 | 1.94302 |
| chr9, mir-199b  | 2.25345 | 1.83527 | 2.34418 | 1.77455 | 2.168   | 2.42636 | 1.88382 | 2.05418 |
| chr9, mir-219-2 | 2.25474 | 1.87092 | 2.40513 | 1.71526 | 2.21447 | 2.50553 | 1.90855 | 2.02816 |
| chr9, mir-126   | 2.3563  | 1.93259 | 2.37963 | 1.91481 | 2.27667 | 2.30148 | 1.91185 | 2.04963 |
| chr9, mir-602   | 2.70711 | 1.89132 | 2.29684 | 1.84579 | 2.35342 | 2.44684 | 1.92632 | 2.04132 |
| chr10, mir-511- | 1.865   | 1.99    | 1.845   | 2.265   | 1.77    | 2.62    | 1.99    | 1.98    |
| chr10, mir-603  | 1.84636 | 2.03917 | 1.34198 | 2.30694 | 1.86802 | 2.71678 | 2.05926 | 2.07322 |
| chr10, mir-604  | 1.82393 | 2.04193 | 1.34163 | 2.30859 | 1.86245 | 2.70659 | 2.07578 | 2.03415 |
| chr10, mir-605  | 1.79124 | 2.03029 | 2.03562 | 1.75343 | 1.85693 | 2.76978 | 2.1119  | 2.03423 |
| chr10, mir-606  | 1.77796 | 1.9928  | 2.0743  | 1.71118 | 1.79936 | 2.7157  | 2.02527 | 2.00635 |
| chr10, mir-346  | 1.57149 | 1.99324 | 2.3173  | 1.77581 | 1.29081 | 2.69176 | 1.995   | 2.01892 |
| chr10, mir-107  | 1.36535 | 1.9957  | 2.11895 | 1.71307 | 1.20684 | 2.83368 | 2.07017 | 2.0071  |

|                  |         |         |         |         |         |         |         |         |
|------------------|---------|---------|---------|---------|---------|---------|---------|---------|
| chr10, mir-607   | 1.37371 | 1.9867  | 2.18227 | 1.7099  | 1.17309 | 2.68649 | 1.99227 | 2.00464 |
| chr10, mir-608   | 1.50703 | 1.99256 | 2.33785 | 1.73884 | 1.28488 | 1.91273 | 1.98207 | 2.00711 |
| chr10, mir-146b  | 1.70468 | 1.99371 | 2.30806 | 1.79355 | 1.36677 | 1.92984 | 1.93629 | 2.04113 |
| chr10, mir-609   | 1.37027 | 2.00929 | 2.08796 | 1.72089 | 1.19566 | 2.64372 | 2.03221 | 1.99248 |
| chr10, mir-202   | 2.10976 | 2.01024 | 2.3439  | 1.86854 | 1.81951 | 2.31415 | 1.93756 | 2.04244 |
| chr11, mir-210   | 1.97909 | 2.01182 | 2.44636 | 1.84159 | 1.79091 | 1.90705 | 1.91386 | 2.02909 |
| chr11, mir-483   | 1.85409 | 2.01515 | 2.44045 | 1.78485 | 1.81651 | 1.93727 | 1.97621 | 1.98667 |
| chr11, mir-610   | 1.79626 | 2.0446  | 1.93921 | 1.75295 | 1.86036 | 1.96633 | 2.12367 | 2.0005  |
| chr11, mir-129-  | 1.86098 | 1.99553 | 2.13818 | 1.72797 | 1.80224 | 1.95615 | 2.03035 | 2.00608 |
| chr11, mir-130a  | 1.83046 | 1.99368 | 2.28092 | 1.69862 | 1.76942 | 1.88103 | 1.96759 | 2.03851 |
| chr11, mir-611   | 1.88743 | 2.01359 | 2.30991 | 1.75479 | 1.79316 | 1.90103 | 1.93385 | 2.01128 |
| chr11, mir-192,  | 1.91483 | 1.9819  | 2.35776 | 1.76034 | 1.77    | 1.95948 | 1.90931 | 2.00465 |
| chr11, mir-612   | 1.82403 | 1.97623 | 2.22091 | 1.7248  | 1.25182 | 1.87857 | 1.91922 | 2.02948 |
| chr11, MALAT1    | 1.66735 | 2.01786 | 2.2549  | 1.69602 | 1.17265 | 1.85694 | 1.89796 | 1.97327 |
| chr11, mir-139   | 2.03723 | 1.96313 | 2.37096 | 1.83831 | 1.77735 | 2.02904 | 1.96892 | 2.05217 |
| chr11, mir-326   | 2.00833 | 1.97667 | 2.33458 | 1.83056 | 1.77861 | 2.03861 | 1.93028 | 2.07903 |
| chr11, PIWIL4    | 1.7802  | 2.04519 | 2.10688 | 1.73525 | 1.24268 | 1.95939 | 2.07909 | 2.04183 |
| chr11, mir-34b,  | 1.67281 | 1.95315 | 2.01397 | 1.68199 | 1.17034 | 1.90247 | 1.99377 | 1.9689  |
| chr11, mir-125b  | 1.75071 | 2.01708 | 2.06792 | 3.37744 | 1.18315 | 1.9378  | 2.05262 | 2.00452 |
| chr11, let-7a-2, | 1.76181 | 1.99945 | 2.06742 | 3.33445 | 1.20275 | 1.97055 | 2.05445 | 2.00522 |
| chr12, mir-200c  | 1.8857  | 1.94392 | 2.3329  | 1.72019 | 1.73785 | 1.93542 | 1.90869 | 2.00206 |
| chr12, mir-613   | 1.73877 | 1.96864 | 2.09346 | 1.67778 | 1.74    | 1.79111 | 1.96296 | 1.96222 |
| chr12, mir-614   | 1.80193 | 1.96105 | 2.19088 | 1.71088 | 1.75579 | 1.86614 | 1.95491 | 1.99535 |
| chr12, mir-196a  | 1.81159 | 1.95785 | 2.25794 | 1.69234 | 2.19299 | 1.84327 | 1.86178 | 1.92243 |
| chr12, mir-615   | 1.74664 | 1.92238 | 2.41566 | 1.64721 | 2.22254 | 1.88279 | 1.89033 | 1.90189 |
| chr12, mir-148b  | 1.6828  | 1.8867  | 2.19915 | 1.63661 | 2.16305 | 1.84644 | 1.86356 | 1.90644 |
| chr12, mir-616   | 1.73061 | 1.91556 | 3.03465 | 1.63818 | 2.11959 | 1.82293 | 1.84495 | 1.91354 |
| chr12, mir-26a-  | 1.71878 | 1.89296 | 2.9307  | 1.63757 | 2.16557 | 1.83991 | 1.86678 | 1.92183 |
| chr12, let-7i    | 1.6663  | 1.95556 | 2.67704 | 1.63407 | 2.32988 | 1.86679 | 1.96611 | 1.90482 |
| chr12, mir-548c  | 1.73508 | 1.91725 | 2.82234 | 1.62675 | 2.25417 | 1.79325 | 1.91492 | 1.91342 |
| chr12, mir-617   | 1.73496 | 1.99657 | 1.92905 | 1.67671 | 2.39197 | 1.97066 | 2.06336 | 1.99635 |
| chr12, mir-618   | 1.73234 | 1.96572 | 1.92903 | 1.69503 | 2.39331 | 1.98697 | 2.07738 | 2.01014 |
| chr12, mir-492   | 1.78529 | 1.96721 | 2.13456 | 1.69941 | 1.74824 | 1.93191 | 1.96353 | 1.97456 |
| chr12, mir-331   | 1.67313 | 1.97885 | 1.98229 | 1.64672 | 1.74191 | 1.81359 | 1.91336 | 1.92947 |
| chr12, mir-135a  | 1.77233 | 1.96647 | 2.11413 | 1.6962  | 1.81313 | 2.02793 | 2.07073 | 1.99167 |
| chr12, mir-619   | 1.76474 | 1.97397 | 2.2806  | 1.68629 | 1.73698 | 1.94216 | 1.93948 | 1.95474 |
| chr12, mir-620   | 1.69148 | 1.98248 | 1.99114 | 1.70476 | 1.78181 | 1.94389 | 2.0051  | 1.95805 |

|                   |         |         |         |         |         |         |         |         |
|-------------------|---------|---------|---------|---------|---------|---------|---------|---------|
| chr12, PIWIL1     | 1.78807 | 1.98874 | 2.09706 | 1.67668 | 1.78891 | 1.91219 | 2.03794 | 1.95937 |
| chr12, RAN        | 1.74974 | 1.98167 | 2.18692 | 1.69897 | 1.7559  | 1.85321 | 1.95372 | 1.96654 |
| chr13, mir-621    | 1.77129 | 1.98887 | 1.36984 | 1.72597 | 1.77758 | 1.98323 | 1.97258 | 2.01936 |
| chr13, mir-16-1   | 1.63223 | 2.02686 | 1.1624  | 1.73314 | 1.83033 | 1.78868 | 2.04132 | 1.98446 |
| chr13, mir-622    | 1.72081 | 2.40775 | 1.92793 | 1.67487 | 1.79847 | 1.82018 | 2.04054 | 1.95676 |
| chr13, mir-17, 1  | 1.68624 | 2.36669 | 1.95835 | 1.60684 | 1.72135 | 1.88218 | 3.0082  | 1.93286 |
| chr13, mir-623    | 1.75636 | 2.35697 | 2.16899 | 1.7097  | 1.75748 | 1.98374 | 1.99818 | 1.99697 |
| chr14, mir-208    | 1.91789 | 1.99624 | 2.34073 | 1.76431 | 1.79752 | 1.99807 | 1.96404 | 2.02083 |
| chr14, mir-624    | 1.75976 | 2.00119 | 2.15119 | 1.7094  | 1.77214 | 1.90833 | 2.02357 | 1.98702 |
| chr14, mir-625    | 1.73011 | 2.02724 | 2.04161 | 1.70874 | 1.82287 | 1.93862 | 2.0131  | 1.98816 |
| chr14, Dicer1     | 1.73632 | 2.02676 | 2.12479 | 1.72239 | 1.79785 | 1.96891 | 2.04903 | 1.99261 |
| chr14, mir-342    | 1.88063 | 1.97458 | 2.32719 | 1.76083 | 1.78219 | 1.93229 | 1.96323 | 2.02333 |
| chr14, mir-345    | 2.03444 | 2.02185 | 2.32926 | 1.81315 | 1.8513  | 1.94519 | 1.95074 | 2.05056 |
| chr14, mir-770, 1 | 1.88013 | 1.98386 | 2.21711 | 1.76265 | 1.8     | 1.97383 | 2.00809 | 1.99775 |
| chr14, mir-379, 1 | 1.92218 | 1.99078 | 2.26078 | 1.77535 | 1.80452 | 2.00556 | 1.99261 | 2.03343 |
| chr14, mir-203    | 2.13677 | 1.95324 | 2.28177 | 1.87059 | 1.87912 | 1.96294 | 1.94706 | 2.11618 |
| chr15, mir-211    | 1.87959 | 1.52449 | 2.23071 | 1.7849  | 1.79347 | 2.03592 | 2.02071 | 2.07816 |
| chr15, mir-626    | 1.76118 | 1.55694 | 2.14718 | 1.75071 | 1.85141 | 1.90753 | 2.04271 | 2.01035 |
| chr15, mir-627    | 1.74602 | 1.47378 | 2.15286 | 1.71735 | 1.82908 | 1.96724 | 2.03061 | 1.99429 |
| chr15, mir-628    | 1.74856 | 2.04227 | 2.05591 | 1.72477 | 1.86303 | 1.83705 | 2.04833 | 2.03682 |
| chr15, mir-190    | 1.80504 | 2.014   | 2.18415 | 1.74378 | 1.81682 | 2.00437 | 2.03667 | 2.03622 |
| chr15, mir-422a   | 1.88067 | 2.01978 | 1.48578 | 1.78978 | 1.80233 | 2.008   | 1.98589 | 2.07856 |
| chr15, mir-629    | 1.84792 | 2.0336  | 2.444   | 1.80776 | 1.81232 | 2.06408 | 2.02472 | 2.0636  |
| chr15, mir-630    | 1.76504 | 2.05165 | 2.09617 | 1.73183 | 1.842   | 1.93826 | 2.03426 | 2.01644 |
| chr15, mir-631    | 1.98646 | 2.00772 | 2.38152 | 1.81658 | 1.8638  | 1.95063 | 1.97127 | 2.07    |
| chr15, mir-184    | 1.87071 | 2.00911 | 2.23741 | 1.81339 | 1.80732 | 2.05009 | 2.02714 | 2.04107 |
| chr15, mir-549    | 1.90297 | 2.05964 | 2.29234 | 1.78658 | 1.81766 | 2.01486 | 2.0209  | 2.05847 |
| chr15, mir-7-2    | 1.85214 | 2.02071 | 2.26024 | 1.76119 | 1.83571 | 2.05071 | 2.04952 | 2.0269  |
| chr15, mir-9-3    | 1.87857 | 2.02439 | 2.36163 | 1.78428 | 1.84102 | 2.01143 | 1.98673 | 2.0151  |
| chr16, mir-662    | 2.08538 | 1.98462 | 2.29808 | 2.10962 | 1.91192 | 1.91423 | 1.88923 | 2.03808 |
| chr16, mir-193b   | 1.80609 | 1.96456 | 2.28033 | 2.21    | 1.76098 | 1.92033 | 1.97761 | 1.9738  |
| chr16, mir-484    | 1.7413  | 1.99783 | 2.20652 | 2.19661 | 1.76774 | 1.8893  | 1.95974 | 1.96939 |
| chr16, mir-138-1  | 1.87713 | 1.98491 | 2.28926 | 2.23667 | 1.34241 | 1.96444 | 1.96037 | 2.0287  |
| chr16, mir-328    | 1.9799  | 1.98388 | 2.36031 | 2.14694 | 2.20714 | 1.91449 | 1.92061 | 2.03531 |
| chr16, mir-140    | 1.83597 | 1.99988 | 2.27354 | 2.15305 | 2.29134 | 1.87915 | 1.9172  | 1.97305 |
| chr16, mir-768    | 1.71539 | 1.99954 | 2.0623  | 2.22197 | 3.03375 | 1.86737 | 1.9846  | 1.96375 |
| chr17, mir-22     | 2.03147 | 1.65253 | 2.3968  | 1.85693 | 1.4088  | 1.98533 | 1.99147 | 2.06947 |



|                 |         |         |         |         |         |         |         |         |
|-----------------|---------|---------|---------|---------|---------|---------|---------|---------|
| chr17, mir-132, | 1.98524 | 1.65349 | 2.46698 | 1.86063 | 1.38349 | 1.97175 | 1.99476 | 2.11556 |
| chr17, mir-195, | 1.95417 | 1.62777 | 1.66631 | 1.83039 | 1.33913 | 1.97592 | 2.02806 | 2.05854 |
| chr17, mir-324  | 1.98259 | 1.63482 | 1.70679 | 1.82375 | 1.3625  | 2.00848 | 2.00866 | 2.06643 |
| chr17, mir-33b  | 2.10069 | 1.76472 | 1.82236 | 1.90972 | 1.64986 | 1.99903 | 1.98611 | 2.07458 |
| chr17, mir-451, | 1.84481 | 1.98259 | 2.26204 | 1.7237  | 2.21444 | 1.91667 | 1.91741 | 2.02926 |
| chr17, mir-423  | 1.72295 | 2.02558 | 2.0959  | 1.71147 | 2.38916 | 1.88958 | 1.99758 | 1.95558 |
| chr17, mir-193a | 1.91936 | 1.99677 | 2.29581 | 1.74282 | 2.28185 | 1.96306 | 1.95339 | 2.03468 |
| chr17, mir-632  | 1.73372 | 2.03584 | 2.18496 | 1.72814 | 2.38115 | 1.87177 | 1.99584 | 1.9946  |
| chr17, mir-152  | 1.86213 | 1.98315 | 2.35602 | 1.73991 | 2.27935 | 1.91972 | 1.93574 | 2.035   |
| chr17, mir-10a  | 1.83695 | 2.03    | 2.45839 | 1.73847 | 2.31949 | 1.93771 | 1.96678 | 2.02263 |
| chr17, mir-196a | 1.86578 | 2.00333 | 2.32216 | 1.74471 | 2.25637 | 1.94157 | 1.95814 | 2.01461 |
| chr17, mir-142  | 1.98902 | 1.995   | 2.37024 | 1.82244 | 2.19317 | 2.01122 | 1.95183 | 2.03646 |
| chr17, mir-454, | 1.74615 | 2.05222 | 2.17119 | 1.71319 | 2.34489 | 1.82111 | 1.97496 | 1.98659 |
| chr17, mir-21   | 1.69193 | 1.99569 | 2.13743 | 1.66982 | 2.26    | 1.88339 | 1.92385 | 1.97954 |
| chr17, mir-633  | 1.76474 | 2.02872 | 2.09359 | 1.71846 | 2.39782 | 1.915   | 1.99269 | 1.96513 |
| chr17, mir-634  | 1.83454 | 2.00781 | 2.23538 | 1.7463  | 2.30471 | 1.93059 | 1.99748 | 2.0079  |
| chr17, mir-548c | 1.76641 | 2.00034 | 2.17955 | 1.69472 | 2.28989 | 1.89101 | 1.94966 | 2.00315 |
| chr17, mir-635  | 1.79034 | 2.00172 | 2.3046  | 1.71529 | 2.31897 | 1.96425 | 1.97747 | 2.00034 |
| chr17, mir-636  | 1.74257 | 2.03062 | 2.24717 | 1.73168 | 2.31142 | 1.89407 | 1.97991 | 1.95363 |
| chr17, mir-657, | 1.96658 | 2.02634 | 2.45317 | 1.86049 | 2.24951 | 1.93439 | 1.90927 | 2.01366 |
| chr18, mir-133a | 1.71451 | 2.00681 | 1.90826 | 1.65944 | 1.78917 | 1.755   | 1.99236 | 3.71132 |
| chr18, mir-187  | 1.7842  | 1.98551 | 2.08    | 1.70956 | 1.77522 | 1.95739 | 2.0042  | 3.70913 |
| chr18, mir-122a | 1.7646  | 1.9574  | 2.2038  | 1.7087  | 1.767   | 1.9966  | 1.9821  | 3.605   |
| chr19, mir-637  | 2.06103 | 2.06333 | 1.68667 | 1.8359  | 1.85179 | 1.93    | 1.94641 | 2.04154 |
| chr19, mir-7-3  | 1.9364  | 1.9958  | 1.547   | 2.2168  | 1.7794  | 1.8502  | 1.8774  | 2.0086  |
| chr19, mir-638  | 1.88956 | 1.98578 | 2.32867 | 1.76267 | 1.78378 | 1.89644 | 1.94    | 2.02778 |
| chr19, mir-199a | 2.0198  | 1.97843 | 2.3851  | 1.76255 | 1.77255 | 1.90451 | 1.94137 | 2.03431 |
| chr19, mir-24-2 | 2.00096 | 2.03731 | 2.38115 | 1.79981 | 1.88865 | 1.85904 | 1.92346 | 2.03519 |
| chr19, mir-181c | 2.036   | 2.01891 | 2.37927 | 1.80764 | 1.80255 | 1.93927 | 1.93    | 2.01727 |
| chr19, mir-639  | 1.9184  | 2.02067 | 1.58973 | 1.7748  | 1.82027 | 1.8612  | 1.948   | 2.03867 |
| chr19, mir-640  | 1.8726  | 1.40856 | 1.46808 | 1.74904 | 1.78413 | 1.91442 | 1.95837 | 2.04452 |
| chr19, mir-641  | 1.98091 | 2.11636 | 2.324   | 1.78509 | 1.79636 | 1.94455 | 1.94491 | 2.04309 |
| chr19, mir-330  | 1.99449 | 2.08388 | 2.35776 | 1.74571 | 1.80122 | 1.95184 | 1.95857 | 1.99735 |
| chr19, mir-642  | 1.98962 | 2.10792 | 2.39019 | 1.74491 | 1.77585 | 1.87358 | 1.94226 | 2.00641 |
| chr19, mir-769  | 2.01614 | 2.09895 | 2.32719 | 1.79842 | 1.80649 | 1.95123 | 1.95825 | 2.00947 |
| chr19, mir-150  | 1.97683 | 2.1319  | 2.37016 | 1.79032 | 1.80397 | 1.89651 | 1.91841 | 1.99603 |
| chr19, mir-99b, | 1.94029 | 2.135   | 2.32571 | 1.75857 | 1.808   | 1.97629 | 1.994   | 2.00071 |

|                   |         |          |          |         |         |         |          |         |
|-------------------|---------|----------|----------|---------|---------|---------|----------|---------|
| chr19, mir-643    | 1.86848 | 2.22962  | 2.28152  | 1.73823 | 1.88595 | 1.87899 | 2.01835  | 2.0481  |
| chr19, mir-512-   | 1.89438 | 2.15443  | 2.30753  | 1.74129 | 1.80113 | 1.86175 | 1.96438  | 2.0332  |
| chr20, mir-103-   | 1.71855 | 1.90727  | 2.1347   | 1.68598 | 1.73256 | 2.56786 | 1.9453   | 1.92726 |
| chr20, mir-663    | 1.77692 | 2.03115  | 1.46846  | 1.70808 | 1.79615 | 2.215   | 2.05346  | 1.98808 |
| chr20, mir-644    | 1.65546 | 1.96111  | 2.00565  | 1.65741 | 1.73815 | 2.50722 | 1.93778  | 1.94333 |
| chr20, mir-499    | 1.9452  | 1.96547  | 2.2552   | 1.7728  | 1.81627 | 2.4436  | 1.88613  | 2.03507 |
| chr20, mir-645    | 1.81206 | 1.97365  | 2.23953  | 1.72178 | 1.77776 | 2.57028 | 1.92458  | 1.97234 |
| chr20, mir-296    | 1.844   | 1.98716  | 2.31642  | 1.73242 | 1.77147 | 2.73432 | 1.97463  | 1.97558 |
| chr20, mir-646    | 1.83316 | 2.0548   | 2.26265  | 1.74551 | 1.81418 | 2.76275 | 2.02908  | 2.01929 |
| chr20, mir-1-1,   | 2.04531 | 1.97641  | 2.33281  | 1.86344 | 1.88594 | 2.38609 | 1.92922  | 2.02219 |
| chr20, mir-124a   | 2.05036 | 1.95893  | 2.34768  | 1.83857 | 1.79054 | 2.49768 | 1.90214  | 2.02411 |
| chr20, mir-647    | 1.95039 | 1.97846  | 2.31673  | 1.79577 | 1.81058 | 2.40038 | 1.89269  | 2.00077 |
| chr21, mir-99a,   | 1.87031 | 2.01923  | 2.01876  | 1.75729 | 1.85062 | 3.09853 | 2.11248  | 2.05496 |
| chr21, mir-125b   | 1.78994 | 2.04858  | 2.01432  | 1.72654 | 1.86247 | 3.03494 | 2.13179  | 2.03346 |
| chr21, mir-155    | 1.71986 | 1.99317  | 2.10731  | 2.21262 | 1.78193 | 3.19655 | 2.0769   | 2.03635 |
| chr21, mir-802    | 1.76968 | 1.98766  | 2.1471   | 1.70314 | 1.76548 | 3.01516 | 2.01766  | 2.0046  |
| chr22, mir-648    | 1.86284 | 2.00838  | 2.2877   | 1.74743 | 1.79027 | 1.97662 | 1.98041  | 2.04392 |
| chr22, mir-185    | 1.98929 | 1.98643  | 2.35986  | 1.817   | 1.83743 | 1.99357 | 1.94014  | 2.05214 |
| chr22, DGCR8-     | 1.98973 | 2.00357  | 2.31455  | 1.80277 | 1.83554 | 1.95125 | 1.95268  | 2.05598 |
| chr22, mir-649    | 2.11    | 2.01128  | 2.30106  | 1.84894 | 1.8883  | 1.93426 | 1.94851  | 2.08617 |
| chr22, mir-130b   | 1.93035 | 2.01351  | 2.4      | 1.79053 | 1.83263 | 1.93982 | 1.95246  | 2.00491 |
| chr22, mir-650    | 1.25949 | 0.805641 | 2.5582   | 1.79936 | 1.48141 | 1.49321 | 2.27872  | 1.45513 |
| chr22, PIWIL3     | 1.79725 | 2.00995  | 2.11142  | 1.71796 | 1.79578 | 1.88701 | 1.98455  | 1.99237 |
| chr22, mir-658,   | 1.94456 | 1.97215  | 2.36823  | 1.76886 | 1.75975 | 1.96278 | 1.96266  | 2.02228 |
| chr22, mir-33     | 1.8975  | 2.04528  | 2.385    | 1.78264 | 1.80056 | 1.9275  | 1.95042  | 2.02167 |
| chr22, let-7a-3,  | 2.16255 | 2.03039  | 2.35628  | 1.90922 | 1.93588 | 1.98843 | 1.93275  | 2.04804 |
| chrX, mir-651     | 2.30032 | 0.98368  | 1.0452   | 1.35936 | 1.43008 | 1.75184 | 1.02208  | 1.99992 |
| chrX, mir-221,    | 2.18406 | 0.969245 | 0.99915  | 1.32632 | 1.43792 | 1.72113 | 1.01028  | 1.89519 |
| chrX, mir-532,    | 2.22176 | 0.989298 | 1.03798  | 1.28465 | 1.3443  | 1.5857  | 0.977105 | 1.91123 |
| chrX, mir-98, let | 2.2323  | 0.986547 | 1.08331  | 1.28504 | 1.33791 | 1.58712 | 0.966115 | 1.91547 |
| chrX, mir-223     | 2.25602 | 0.992266 | 1.07211  | 1.32969 | 1.40055 | 1.77477 | 1.00797  | 1.95094 |
| chrX, mir-421     | 2.25684 | 1.00582  | 1.04082  | 1.32153 | 1.40827 | 1.63612 | 1.00153  | 1.93459 |
| chrX, mir-545,    | 2.23756 | 1.00545  | 1.06919  | 1.33642 | 1.42626 | 1.66276 | 1.00594  | 1.90805 |
| chrX, mir-384     | 2.21857 | 0.992321 | 1.05268  | 1.33875 | 1.42929 | 1.64554 | 1.02821  | 1.88339 |
| chrX, mir-325     | 2.25023 | 0.990455 | 1.04295  | 1.33295 | 1.43636 | 1.65523 | 1.01523  | 1.90545 |
| chrX, mir-361     | 2.27581 | 1.00473  | 0.991506 | 1.37882 | 1.49269 | 1.69936 | 1.04366  | 1.96731 |
| chrX, mir-652     | 2.22402 | 0.986355 | 1.03271  | 1.32822 | 1.37907 | 1.71252 | 1.0229   | 1.90131 |

|                 |         |          |          |         |         |         |          |         |
|-----------------|---------|----------|----------|---------|---------|---------|----------|---------|
| chrX, mir-448   | 2.27538 | 1.01363  | 0.982625 | 1.40037 | 1.5315  | 1.7075  | 1.04787  | 1.95263 |
| chrX, mir-766   | 2.23467 | 0.959457 | 1.12348  | 1.25609 | 1.29337 | 1.58391 | 0.949131 | 1.90196 |
| chrX, mir-220   | 2.20341 | 0.98878  | 1.02829  | 1.31854 | 1.38732 | 1.69122 | 0.991463 | 1.90537 |
| chrX, mir-363,  | 2.12762 | 0.986231 | 1.00885  | 1.30861 | 1.44131 | 1.6     | 1.457    | 1.85062 |
| chrX, mir-450-1 | 2.20333 | 0.963712 | 1.03189  | 1.28932 | 1.37818 | 1.55811 | 1.40568  | 1.86901 |
| chrX, mir-504   | 2.23    | 0.979    | 0.963846 | 1.35038 | 1.48469 | 1.70038 | 1.54223  | 1.93061 |
| chrX, mir-505   | 2.19286 | 0.985385 | 1.03209  | 1.35132 | 1.43308 | 1.68484 | 1.47901  | 1.87637 |
| chrX, mir-513-1 | 2.27907 | 0.989176 | 1.01613  | 1.37711 | 1.4649  | 1.65907 | 1.49799  | 1.9348  |
| chrX, FMR1      | 2.15933 | 0.97298  | 0.979929 | 1.33482 | 1.42844 | 1.62004 | 1.49124  | 1.89387 |
| chrX, mir-224,  | 2.35899 | 0.984573 | 1.12798  | 1.33    | 1.36178 | 1.71868 | 1.46178  | 1.94403 |
| chrX, mir-105-1 | 2.28611 | 0.964445 | 1.07244  | 1.36511 | 1.42956 | 1.77522 | 1.49333  | 1.92733 |

| TUMOR ID        | 3832    | 4221    | 4350    | 4470    | 4494    | 4554    | 517     | 559     |
|-----------------|---------|---------|---------|---------|---------|---------|---------|---------|
| MiRNA ID        |         |         |         |         |         |         |         |         |
| chr1, mir-200b, | 2.13093 | 2.14209 | 2.34349 | 2.01046 | 1.99767 | 1.96977 | 1.83186 | 2.11698 |
| chr1, mir-551a  | 2.06323 | 2.21774 | 2.42194 | 2.05645 | 2.02871 | 2.00161 | 1.82968 | 2.26645 |
| chr1, mir-34a   | 1.89933 | 2.01427 | 2.24427 | 2.0784  | 2.00707 | 2.01507 | 1.89173 | 2.0884  |
| chr1, mir-801   | 1.88143 | 1.965   | 2.0931  | 2.04762 | 1.985   | 2.025   | 1.85762 | 1.96762 |
| chr1, mir-552   | 1.96688 | 1.95571 | 2.09701 | 2.07013 | 2.06221 | 1.95662 | 1.77364 | 2.14442 |
| chr1, AGO4, A   | 1.90104 | 1.91558 | 1.97351 | 2.04535 | 1.98426 | 2.00959 | 1.86121 | 1.92539 |
| chr1, mir-30e,  | 1.90897 | 1.91338 | 2.04368 | 2.06706 | 2.02228 | 2.0039  | 1.83743 | 1.98853 |
| chr1, mir-101-1 | 2.00818 | 1.90929 | 2.0219  | 2.08913 | 2.02929 | 2.08452 | 1.80032 | 2.02302 |
| chr1, SERBP1    | 1.96538 | 1.87    | 1.95663 | 2.08082 | 2.03837 | 2.00864 | 1.79984 | 2.00163 |
| chr1, mir-186   | 2.13309 | 1.87651 | 1.8543  | 2.11711 | 2.11228 | 2.03812 | 1.65134 | 2.1049  |
| chr1, mir-137   | 2.13341 | 1.88097 | 1.78364 | 2.0892  | 2.04977 | 1.95381 | 1.62091 | 2.07875 |
| chr1, mir-553   | 2.02368 | 1.9172  | 1.96416 | 2.09184 | 2.0468  | 2.03608 | 1.79688 | 1.98704 |
| chr1, mir-197   | 1.96596 | 1.89574 | 1.98092 | 2.06106 | 1.99879 | 2.01383 | 1.83404 | 1.95631 |
| chr1, DDX20     | 1.99195 | 1.94103 | 2.06308 | 2.06643 | 2.00281 | 2.00941 | 1.87373 | 2.03216 |
| chr1, mir-554   | 2.26488 | 1.93024 | 2.05691 | 2.00488 | 1.94512 | 1.93714 | 1.77929 | 1.96774 |
| chr1, mir-92b   | 1.93185 | 2.04009 | 2.27222 | 2.00176 | 1.96204 | 1.92519 | 1.78611 | 2.07917 |
| chr1, mir-555   | 1.95152 | 1.86634 | 2.00241 | 1.98661 | 1.90473 | 1.94429 | 1.77929 | 1.84848 |
| chr1, mir-9-1   | 1.97701 | 1.92598 | 2.11102 | 1.9926  | 1.95    | 1.92087 | 1.8015  | 1.95583 |
| chr1, mir-765   | 2.00865 | 1.97423 | 2.12532 | 1.99514 | 1.95631 | 1.93324 | 1.77739 | 2.06396 |
| chr1, mir-556   | 2.25022 | 1.81022 | 1.93372 | 1.98555 | 1.96058 | 1.91066 | 1.71482 | 1.97307 |
| chr1, mir-557   | 1.9189  | 1.84024 | 1.85724 | 1.97543 | 1.95882 | 1.91716 | 1.72732 | 1.95874 |
| chr1, mir-214,  | 1.96513 | 1.78169 | 1.85272 | 2.0081  | 1.9639  | 1.92005 | 1.68559 | 1.88651 |
| chr1, mir-488   | 2.0205  | 1.84511 | 1.9317  | 1.99695 | 1.99901 | 1.94957 | 1.66241 | 2.05021 |

|                  |         |         |         |         |         |         |         |         |
|------------------|---------|---------|---------|---------|---------|---------|---------|---------|
| chr1, mir-181b-  | 1.96493 | 1.78622 | 1.80865 | 1.99892 | 1.94014 | 1.90676 | 1.73142 | 1.87845 |
| chr1, mir-135b   | 1.84653 | 1.96092 | 2.19204 | 2.02173 | 2.01408 | 1.98429 | 1.81786 | 2.06184 |
| chr1, mir-29c, l | 1.96394 | 1.89188 | 2.08    | 2.01238 | 2.02381 | 1.9785  | 1.78812 | 2.05775 |
| chr1, mir-205    | 2.03908 | 1.97605 | 2.05954 | 2.05018 | 2.06945 | 1.98807 | 1.70771 | 2.13028 |
| chr1, mir-215, l | 1.98713 | 1.89025 | 1.80426 | 1.88246 | 1.9532  | 2.00426 | 1.67    | 1.92869 |
| chr2, mir-558    | 1.90618 | 1.83745 | 1.83464 | 2.02891 | 1.974   | 2.48718 | 1.77727 | 1.916   |
| chr2, mir-559    | 1.89851 | 1.95138 | 1.98862 | 1.99245 | 1.97702 | 2.49745 | 1.86458 | 1.90149 |
| chr2, mir-217, l | 1.95694 | 2.38612 | 1.83261 | 1.97836 | 1.98216 | 2.39821 | 1.71769 | 1.9906  |
| chr2, mir-560    | 1.88778 | 2.22667 | 2.18222 | 2.15    | 2.39222 | 2.00111 | 1.80556 | 2.23556 |
| chr2, mir-128a   | 1.95932 | 1.88977 | 1.8818  | 2.05962 | 1.99398 | 2.03293 | 1.87609 | 1.91782 |
| chr2, mir-10b    | 2.06664 | 2.04286 | 2.02084 | 2.04899 | 2.06706 | 2.00067 | 1.67681 | 2.11798 |
| chr2, mir-561    | 2.16633 | 1.9223  | 1.80093 | 2.0777  | 2.08863 | 2.03079 | 1.64669 | 2.06849 |
| chr2, mir-26b    | 1.91712 | 2.06966 | 2.24746 | 2.03085 | 1.9861  | 1.9917  | 1.80932 | 2.0961  |
| chr2, mir-375    | 1.91763 | 2.07032 | 2.24591 | 2.04613 | 2.02452 | 1.96882 | 1.77484 | 2.13688 |
| chr2, mir-153-1  | 1.92179 | 2.01615 | 2.21526 | 2.045   | 2.02192 | 1.9968  | 1.80872 | 2.14218 |
| chr2, mir-562    | 1.94533 | 1.9035  | 1.93317 | 2.04617 | 2.002   | 1.979   | 1.80333 | 1.973   |
| chr2, mir-149    | 2.086   | 2.124   | 2.18775 | 2.03025 | 2.04025 | 1.97575 | 1.745   | 2.137   |
| chr3, mir-563    | 1.9727  | 1.88429 | 1.94683 | 2.06936 | 2.01619 | 2.47571 | 2.29984 | 2.23333 |
| chr3, mir-128b   | 2.09524 | 1.87037 | 1.85091 | 2.05116 | 2.0425  | 1.46799 | 2.14378 | 2.32177 |
| chr3, mir-26a-1  | 1.97629 | 1.95218 | 1.98637 | 2.0421  | 2.00887 | 2.01589 | 2.24105 | 2.24226 |
| chr3, mir-138-1  | 1.97825 | 1.93476 | 2.10064 | 2.07659 | 2.04151 | 2.04222 | 2.25087 | 2.3919  |
| chr3, mir-564    | 1.94348 | 1.94152 | 2.02272 | 2.08293 | 2.05576 | 2.01217 | 2.34641 | 2.31435 |
| chr3, mir-565    | 1.9671  | 1.89169 | 1.97806 | 2.08516 | 2.00976 | 2.04113 | 2.47129 | 2.24    |
| chr3, mir-425, l | 1.86212 | 2.03909 | 1.39293 | 2.09232 | 2.05253 | 2.03525 | 2.33838 | 2.32687 |
| chr3, mir-566    | 1.94712 | 2.11237 | 1.62678 | 2.05678 | 1.9961  | 2.01407 | 2.25881 | 2.18542 |
| chr3, let-7g, mi | 1.89735 | 1.99657 | 2.11492 | 2.07475 | 2.00691 | 2.03022 | 2.35475 | 2.29679 |
| chr3, mir-567    | 1.99591 | 1.83175 | 1.97701 | 2.0892  | 2.04912 | 3.06219 | 2.33547 | 2.29263 |
| chr3, mir-568    | 1.9758  | 1.82554 | 1.98344 | 2.05573 | 2.02312 | 2.00019 | 2.2521  | 2.2658  |
| chr3, mir-198    | 1.97576 | 1.91744 | 1.97416 | 2.05144 | 2.02968 | 1.98632 | 2.2232  | 2.302   |
| chr3, mir-15b, l | 1.96825 | 1.81987 | 1.88338 | 2.0413  | 1.98    | 1.99032 | 2.14266 | 2.20071 |
| chr3, mir-551b   | 2.09136 | 1.8467  | 1.71146 | 2.02204 | 1.96816 | 1.92524 | 2.18388 | 2.22456 |
| chr3, mir-569    | 2.00444 | 1.85985 | 1.89637 | 2.06133 | 2.01252 | 1.96178 | 2.17859 | 2.292   |
| chr3, mir-28     | 1.98556 | 1.7829  | 1.84349 | 2.02278 | 1.86195 | 1.98539 | 2.28923 | 2.19852 |
| chr3, mir-570    | 2.14026 | 1.91184 | 1.75026 | 1.22447 | 2.78868 | 2.65868 | 2.31289 | 1.83079 |
| chr4, mir-571    | 2.06824 | 2.06765 | 2.00706 | 2.01765 | 2.06647 | 1.92647 | 2.34706 | 1.99294 |
| chr4, mir-95     | 1.98886 | 2.07886 | 2.174   | 2.12086 | 2.05214 | 1.85286 | 2.18657 | 2.15357 |
| chr4, mir-572    | 2.10924 | 2.00038 | 2.04582 | 2.11392 | 2.15671 | 1.89709 | 2.46658 | 2.20835 |

|                 |         |         |         |         |         |         |         |         |
|-----------------|---------|---------|---------|---------|---------|---------|---------|---------|
| chr4, mir-218-1 | 2.20116 | 1.95445 | 1.84568 | 2.1409  | 2.1331  | 1.83335 | 2.12987 | 2.12277 |
| chr4, mir-573   | 2.05488 | 1.90307 | 1.94071 | 2.12583 | 2.10417 | 1.87228 | 2.19748 | 2.10252 |
| chr4, mir-574   | 1.92586 | 1.91111 | 2.06657 | 2.07838 | 2.01899 | 2.02788 | 2.36525 | 1.98828 |
| chr4, mir-575   | 1.95165 | 1.96214 | 2.12495 | 2.10485 | 1.9232  | 2.27883 | 2.34602 | 2.11447 |
| chr4, mir-576   | 2.01078 | 1.88871 | 1.83871 | 2.06802 | 2.15991 | 2.25215 | 2.13095 | 2.00431 |
| chr4, mir-367,  | 1.99515 | 1.90689 | 1.94636 | 2.04803 | 2.14727 | 2.33235 | 2.28962 | 1.96038 |
| chr4, mir-577   | 2.15422 | 1.8753  | 1.83994 | 2.08536 | 2.20199 | 2.26325 | 2.1606  | 2.04139 |
| chr4, mir-578   | 2.07738 | 1.91524 | 1.88159 | 2.12063 | 1.94651 | 2.24706 | 2.14571 | 2.02944 |
| chr5, Drosha    | 1.92804 | 1.86564 | 1.88603 | 2.03659 | 1.98197 | 1.94951 | 2.12619 | 1.99137 |
| chr5, mir-579   | 1.84163 | 1.8183  | 1.88333 | 2.05354 | 1.92531 | 1.99347 | 2.23388 | 1.85912 |
| chr5, mir-580   | 1.97528 | 1.80088 | 1.8068  | 2.016   | 1.96376 | 1.92536 | 2.07648 | 1.9672  |
| chr5, mir-581   | 2.01619 | 1.88851 | 1.89493 | 2.07411 | 1.98127 | 2.00791 | 2.21522 | 2.02142 |
| chr5, mir-449,  | 1.94522 | 1.83985 | 1.90464 | 2.06283 | 1.99196 | 2.00043 | 2.23638 | 1.93449 |
| chr5, mir-582   | 2.06008 | 1.85967 | 1.7875  | 2.05542 | 1.99775 | 1.93292 | 2.12542 | 2.00142 |
| chr5, mir-9-2   | 2.088   | 1.85125 | 1.92944 | 2.07262 | 2.00331 | 1.94844 | 2.11075 | 1.98963 |
| chr5, mir-583   | 2.01489 | 1.83804 | 1.9818  | 2.07947 | 1.97842 | 1.96316 | 2.25624 | 1.92842 |
| chr5, mir-584   | 1.94904 | 1.87446 | 2.04229 | 2.02711 | 1.99422 | 1.9241  | 2.1847  | 2.07    |
| chr5, mir-143,  | 1.90584 | 1.97465 | 2.1096  | 2.06178 | 2.00188 | 1.95238 | 2.19208 | 2.10416 |
| chr5, mir-378   | 1.92771 | 1.91193 | 1.48916 | 2.03892 | 1.96422 | 1.96434 | 2.25265 | 2.03964 |
| chr5, mir-146a  | 1.94677 | 1.83    | 1.98566 | 2.07869 | 2.01707 | 1.97253 | 2.19273 | 2.00313 |
| chr5, mir-103-1 | 1.94848 | 1.89053 | 1.91871 | 2.06311 | 2.01924 | 2.0078  | 2.16258 | 1.96856 |
| chr5, mir-218-2 | 1.98832 | 1.98196 | 1.98009 | 2.06925 | 1.99822 | 1.9729  | 2.1114  | 2.06299 |
| chr5, mir-585   | 1.97627 | 1.92482 | 2.02445 | 2.05127 | 1.99791 | 1.95064 | 2.111   | 2.076   |
| chr5, mir-340   | 1.89774 | 1.87591 | 1.98301 | 2.02237 | 1.95677 | 1.92785 | 2.19634 | 1.96419 |
| chr6, mir-548a- | 1.9652  | 1.91016 | 1.88886 | 1.98683 | 1.99211 | 1.95659 | 2.16854 | 1.9922  |
| chr6, mir-219-1 | 1.84598 | 2.02907 | 2.2934  | 2.03918 | 2.00701 | 1.96516 | 2.24    | 2.12577 |
| chr6, XPO5      | 1.84836 | 1.92968 | 2.05442 | 2.01612 | 1.97381 | 1.9635  | 2.33763 | 1.95894 |
| chr6, mir-586   | 2.02224 | 1.80853 | 1.80129 | 2.06871 | 1.99966 | 1.99129 | 2.3606  | 1.94224 |
| chr6, mir-206,  | 1.94029 | 1.86309 | 2.02576 | 2.03165 | 1.97741 | 1.9723  | 2.23878 | 1.97842 |
| chr6, mir-30c-2 | 2.09746 | 1.88288 | 1.60833 | 2.07462 | 2.07182 | 1.99724 | 1.25852 | 2.03689 |
| chr6, mir-587   | 1.96118 | 1.99109 | 1.89064 | 2.09055 | 2.071   | 1.571   | 1.4     | 2.13555 |
| chr6, mir-548b  | 2.06788 | 1.96274 | 1.65407 | 2.15195 | 2.11372 | 1.55292 | 1.26991 | 2.05478 |
| chr6, mir-588   | 2.21443 | 1.93951 | 1.4782  | 2.11016 | 2.07525 | 1.50033 | 1.17279 | 2.02312 |
| chr6, mir-548a- | 2.05244 | 1.98535 | 1.76772 | 2.16598 | 2.09339 | 1.58173 | 1.33047 | 2.06835 |
| chr7, mir-339   | 2.06947 | 2.07342 | 2.25342 | 1.92132 | 1.98    | 1.82526 | 2.205   | 2.05158 |
| chr7, mir-589   | 1.63176 | 1.95765 | 2.22059 | 1.90647 | 1.89569 | 1.85765 | 2.55118 | 1.98235 |
| chr7, mir-148a  | 1.86708 | 1.76802 | 1.98292 | 1.96813 | 1.93021 | 1.8825  | 2.73198 | 1.91125 |

|                  |         |         |         |         |         |         |         |         |
|------------------|---------|---------|---------|---------|---------|---------|---------|---------|
| chr7, mir-196b   | 1.93531 | 1.92667 | 2.01896 | 1.93385 | 1.9501  | 1.90573 | 2.61281 | 1.95594 |
| chr7, mir-550-1  | 1.8979  | 1.76753 | 1.86914 | 1.94432 | 1.93086 | 1.92518 | 2.75037 | 1.88852 |
| chr7, has-mir-5  | 1.86000 | 1.76000 | 1.82000 | 1.97000 | 1.91000 | 1.92000 | 2.75000 | 1.92000 |
| chr7, mir-590    | 1.71957 | 1.81269 | 1.90656 | 1.90118 | 1.83914 | 1.88774 | 2.23817 | 1.81194 |
| chr7, mir-653, l | 1.94313 | 1.71569 | 1.7615  | 1.90825 | 1.89119 | 1.82087 | 2.00244 | 1.86087 |
| chr7, mir-591    | 1.93712 | 1.79768 | 1.75192 | 1.94072 | 1.92232 | 1.87584 | 1.9688  | 1.96472 |
| chr7, mir-25, m  | 1.67159 | 1.85327 | 2.11681 | 1.89159 | 1.86796 | 1.82053 | 2.07124 | 1.95965 |
| chr7, mir-592    | 1.96869 | 1.79715 | 1.21885 | 1.95462 | 1.94408 | 1.86892 | 2.10885 | 1.96992 |
| chr7, SDN1, m    | 1.90355 | 1.78738 | 1.27527 | 1.94878 | 1.91722 | 1.87818 | 2.21511 | 1.91989 |
| chr7, mir-129-1  | 1.87494 | 1.88303 | 1.48989 | 1.94225 | 1.92697 | 1.90461 | 2.22225 | 1.97393 |
| chr7, mir-182, l | 1.81808 | 1.91778 | 1.58444 | 1.94576 | 1.94091 | 1.92667 | 2.15839 | 1.99838 |
| chr7, mir-335    | 1.88133 | 1.84047 | 1.28734 | 1.95266 | 1.94844 | 1.87477 | 2.1468  | 1.89156 |
| chr7, mir-29a, l | 1.834   | 1.81274 | 1.27411 | 1.98169 | 1.93284 | 1.91516 | 2.23042 | 1.91189 |
| chr7, mir-490    | 2.02053 | 1.76053 | 1.11834 | 1.94681 | 1.91515 | 1.88763 | 2.07012 | 1.94935 |
| chr7, has-mir-5  | 1.81107 | 1.85833 | 1.94024 | 1.96738 | 1.88976 | 1.91929 | 2.18738 | 1.87655 |
| chr7, mir-671    | 1.86683 | 1.94702 | 2.09202 | 1.95029 | 2.00375 | 1.91356 | 2.08019 | 1.99894 |
| chr7, mir-153-2  | 1.92244 | 1.96035 | 1.99698 | 1.91581 | 2.03302 | 1.88965 | 2.06907 | 1.93849 |
| chr7, mir-595    | 1.89543 | 1.96716 | 2.04963 | 1.92062 | 2.0063  | 1.89765 | 1.97296 | 2.02222 |
| chr8, mir-596    | 2.17101 | 2.09159 | 2.13667 | 2.09696 | 2.12623 | 1.55725 | 1.76884 | 2.1587  |
| chr8, mir-597    | 2.05379 | 1.93124 | 1.91269 | 2.10014 | 2.07179 | 1.50276 | 1.79876 | 2.04559 |
| chr8, mir-124a-  | 2.00786 | 2.01455 | 2.06607 | 2.05107 | 2.06036 | 1.49286 | 1.73313 | 2.1242  |
| chr8, mir-598    | 1.99218 | 2.03448 | 2.16724 | 2.05379 | 2.01816 | 1.56333 | 1.80471 | 2.18414 |
| chr8, mir-383    | 2.18364 | 1.97727 | 1.88609 | 2.15173 | 2.141   | 1.55082 | 1.69145 | 2.16455 |
| chr8, mir-320, l | 1.95308 | 1.96369 | 2.03791 | 2.07006 | 2.02157 | 1.53462 | 1.86256 | 2.00695 |
| chr8, mir-486    | 1.93835 | 2.03059 | 2.23141 | 2.05482 | 2.02706 | 1.96894 | 1.79906 | 2.16847 |
| chr8, mir-124a-  | 2.16506 | 1.93083 | 1.89577 | 2.07115 | 2.08109 | 2.03096 | 1.68987 | 2.06827 |
| chr8, mir-599    | 2.01711 | 1.83161 | 1.74215 | 2.07725 | 2.00812 | 1.99369 | 1.77114 | 1.93732 |
| chr8, mir-548a-  | 2.07787 | 1.86615 | 1.86803 | 2.05516 | 2.04385 | 1.96172 | 1.67418 | 2.03443 |
| chr8, mir-548d-  | 1.87978 | 1.83739 | 1.88724 | 2.00791 | 1.94142 | 1.95836 | 2.22866 | 1.87612 |
| chr8, mir-30b, l | 2.01487 | 1.81026 | 1.86533 | 2.00599 | 1.98974 | 1.99303 | 2.08408 | 1.95138 |
| chr8, AGO2       | 1.89877 | 1.94963 | 1.98756 | 1.9792  | 1.94586 | 1.93528 | 2.2129  | 1.96358 |
| chr8, mir-151    | 1.89158 | 1.85758 | 1.85392 | 1.98958 | 1.94133 | 1.91842 | 2.28108 | 1.8555  |
| chr8, mir-661    | 2.47108 | 2.0673  | 2.38162 | 1.95865 | 2.02432 | 1.93946 | 2.05297 | 2.04135 |
| chr9, mir-101-2  | 2.04636 | 1.92258 | 4.42921 | 2.10517 | 2.58702 | 2.57735 | 1.3247  | 2.01768 |
| chr9, mir-491    | 2.12642 | 1.94314 | 1.91888 | 2.09642 | 2.55187 | 2.54328 | 1.26328 | 1.98836 |
| chr9, mir-31     | 2.16678 | 1.96915 | 1.81305 | 2.12644 | 2.60297 | 0.97    | 1.31237 | 2.02025 |
| chr9, mir-204    | 2.05949 | 1.91701 | 1.92204 | 2.06752 | 2.06737 | 2.44029 | 1.70139 | 2.07321 |

|                   |         |         |         |         |         |         |          |         |
|-------------------|---------|---------|---------|---------|---------|---------|----------|---------|
| chr9, mir-7-1     | 1.97542 | 1.90075 | 2.03283 | 2.07683 | 2.0485  | 2.499   | 1.6865   | 2.0405  |
| chr9, let-7a-1, l | 1.94887 | 1.86082 | 2.01866 | 2.04103 | 2.01361 | 2.54721 | 1.76309  | 1.97907 |
| chr9, mir-23b, l  | 1.97581 | 1.97057 | 2.08067 | 2.05448 | 2.03191 | 2.44352 | 1.70048  | 2.08429 |
| chr9, mir-32      | 1.97117 | 1.9368  | 1.92484 | 2.03711 | 2.01945 | 2.52758 | 2.28281  | 1.98766 |
| chr9, mir-455     | 1.94505 | 2.04295 | 2.17819 | 2.02428 | 1.99829 | 2.36629 | 2.24181  | 2.15381 |
| chr9, mir-147     | 1.9351  | 1.90833 | 2.00167 | 2.00125 | 1.98146 | 2.35438 | 2.21448  | 2.07552 |
| chr9, mir-600     | 1.92343 | 1.86102 | 1.96927 | 2.03927 | 1.98847 | 2.43424 | 2.3462   | 1.98759 |
| chr9, mir-601     | 1.89365 | 1.97562 | 2.14667 | 2.00531 | 1.98354 | 2.3875  | 2.26417  | 2.0549  |
| chr9, mir-181a-   | 1.84198 | 1.82431 | 1.95155 | 2.00198 | 1.97871 | 2.46164 | 2.33405  | 1.90595 |
| chr9, mir-199b    | 1.85273 | 2.03127 | 2.22491 | 2.00709 | 1.97891 | 2.01255 | 2.23036  | 2.11127 |
| chr9, mir-219-2   | 1.84434 | 2.01224 | 2.2675  | 2.01395 | 1.97605 | 1.98132 | 2.2471   | 2.05158 |
| chr9, mir-126     | 2.05778 | 2.14148 | 2.41963 | 1.98852 | 2.02444 | 1.93444 | 1.33704  | 2.12407 |
| chr9, mir-602     | 2.04237 | 2.08026 | 2.11605 | 1.95553 | 1.93263 | 1.99158 | 0.991842 | 1.98263 |
| chr10, mir-511-   | 2.05    | 1.885   | 2.23    | 2.1     | 2.03    | 2.045   | 2.14     | 2.075   |
| chr10, mir-603    | 2.02182 | 1.95207 | 2.03942 | 2.05752 | 2.0419  | 2.04248 | 2.10033  | 2.10421 |
| chr10, mir-604    | 2.00733 | 1.96733 | 1.93044 | 2.08237 | 2.04318 | 2.01948 | 2.11896  | 2.07785 |
| chr10, mir-605    | 2.10029 | 1.8938  | 1.82132 | 2.06292 | 2.04526 | 1.97759 | 2.0635   | 2.04321 |
| chr10, mir-606    | 1.96473 | 1.89978 | 1.92226 | 2.02452 | 2.00021 | 1.9429  | 2.10398  | 2.01032 |
| chr10, mir-346    | 1.94581 | 2.03054 | 2.14487 | 2.03176 | 2.02905 | 1.95838 | 2.14514  | 2.13554 |
| chr10, mir-107    | 2.02816 | 1.88684 | 1.93009 | 2.05272 | 2.03237 | 1.99798 | 2.28956  | 2.01412 |
| chr10, mir-607    | 1.86598 | 1.91144 | 2.0566  | 2.02588 | 2.00175 | 1.99907 | 2.2299   | 1.98175 |
| chr10, mir-608    | 1.89438 | 1.99802 | 2.12058 | 2.05207 | 1.9995  | 1.99876 | 2.18488  | 2.08355 |
| chr10, mir-146b   | 1.87581 | 2.04016 | 2.19532 | 2.05694 | 1.99129 | 2.00742 | 2.12452  | 2.09097 |
| chr10, mir-609    | 1.97248 | 1.91681 | 1.97381 | 2.03088 | 2.00894 | 1.93929 | 2.15973  | 1.98062 |
| chr10, mir-202    | 2.08976 | 2.15122 | 2.27512 | 1.9839  | 2.01195 | 1.99366 | 1.96122  | 2.03098 |
| chr11, mir-210    | 1.94114 | 2.09955 | 2.28023 | 2.00591 | 1.9575  | 1.98545 | 2.15295  | 2.01727 |
| chr11, mir-483    | 1.98348 | 2.06333 | 2.21742 | 1.98894 | 2.00455 | 1.94242 | 2.175    | 1.98152 |
| chr11, mir-610    | 2.08899 | 1.85921 | 1.91295 | 2.07827 | 2.05302 | 2.02072 | 2.5      | 2.04309 |
| chr11, mir-129-   | 1.99203 | 1.93727 | 2.10762 | 2.03454 | 2.03063 | 1.97469 | 2.58504  | 2.04238 |
| chr11, mir-130a   | 1.93368 | 1.9669  | 2.17391 | 2.05563 | 1.98782 | 2.01391 | 2.70184  | 2.04747 |
| chr11, mir-611    | 1.90274 | 2.02145 | 2.18333 | 2.03051 | 1.98658 | 1.9612  | 2.66521  | 2.06197 |
| chr11, mir-192,   | 1.88034 | 2.04017 | 2.31172 | 2.02241 | 1.98897 | 1.9681  | 2.62983  | 2.08276 |
| chr11, mir-612    | 1.83247 | 1.91805 | 2.23078 | 2.04558 | 1.97312 | 2.00221 | 2.83195  | 2.03987 |
| chr11, MALAT1     | 1.81449 | 1.93123 | 2.18898 | 2.02469 | 1.99224 | 2.0052  | 2.86224  | 1.93071 |
| chr11, mir-139    | 1.85675 | 2.08205 | 2.3853  | 2.05687 | 2.03048 | 1.95916 | 2.22663  | 2.17855 |
| chr11, mir-326    | 1.88167 | 2.05444 | 2.37708 | 2.04194 | 2.00639 | 1.94708 | 2.21694  | 2.1975  |
| chr11, PIWIL4     | 2.0498  | 1.8641  | 1.98597 | 2.05173 | 2.03444 | 1.9821  | 2.28658  | 2.02434 |

|                  |         |         |         |         |         |         |         |         |
|------------------|---------|---------|---------|---------|---------|---------|---------|---------|
| chr11, mir-34b,  | 1.95507 | 1.85151 | 2.03219 | 1.99109 | 1.95425 | 1.96808 | 2.2824  | 1.89938 |
| chr11, mir-125b  | 2.01506 | 1.87333 | 1.98363 | 2.01458 | 2.01131 | 1.97798 | 2.27893 | 2.0094  |
| chr11, let-7a-2, | 1.97654 | 1.84428 | 2.0217  | 2.01956 | 2.02137 | 1.97978 | 2.26511 | 2.03764 |
| chr12, mir-200c  | 1.96935 | 2.48738 | 2.09916 | 2.02224 | 1.95822 | 1.94916 | 2.26309 | 2.04439 |
| chr12, mir-613   | 2.02914 | 2.4563  | 2.03605 | 2.02654 | 1.96691 | 2.02457 | 2.27062 | 1.96383 |
| chr12, mir-614   | 2.07272 | 2.43544 | 2.10474 | 2.01254 | 1.98123 | 1.98044 | 2.25184 | 2.0157  |
| chr12, mir-196a  | 2.02178 | 2.42084 | 2.08738 | 1.94336 | 1.9243  | 1.85458 | 2.19953 | 1.9586  |
| chr12, mir-615   | 2.12418 | 2.47303 | 2.09336 | 1.92967 | 1.93918 | 1.85934 | 2.22877 | 1.92705 |
| chr12, mir-148b  | 1.95602 | 2.34619 | 1.94644 | 1.93093 | 1.89068 | 1.90932 | 2.24873 | 1.89568 |
| chr12, mir-616   | 1.96061 | 2.34647 | 2.01232 | 1.9297  | 1.89687 | 1.90424 | 2.1504  | 1.91515 |
| chr12, mir-26a-  | 1.99591 | 2.32809 | 1.97696 | 1.95365 | 1.88165 | 1.93409 | 2.1653  | 1.93661 |
| chr12, let-7i    | 2.11864 | 2.28728 | 1.80858 | 1.98451 | 1.91833 | 1.94432 | 2.08414 | 1.86716 |
| chr12, mir-548c  | 1.99792 | 2.3055  | 1.93058 | 1.95317 | 1.91742 | 1.93242 | 2.125   | 1.89933 |
| chr12, mir-617   | 2.2254  | 2.36394 | 1.84044 | 2.02015 | 1.98343 | 1.92095 | 2.16212 | 2.00708 |
| chr12, mir-618   | 2.21393 | 2.35579 | 1.84021 | 2.00035 | 1.98145 | 1.93703 | 2.08972 | 2.012   |
| chr12, mir-492   | 2       | 2.40441 | 2.09265 | 2.01015 | 1.98515 | 1.99059 | 2.28103 | 2.02176 |
| chr12, mir-331   | 2.06244 | 2.38435 | 1.84527 | 1.9771  | 1.93679 | 1.95771 | 2.28771 | 1.87191 |
| chr12, mir-135a  | 2.16333 | 2.41387 | 1.84067 | 2.013   | 1.99093 | 1.92187 | 2.19687 | 2.0384  |
| chr12, mir-619   | 1.98828 | 2.44914 | 2.1075  | 2.03129 | 1.96724 | 1.95526 | 2.29405 | 2.01741 |
| chr12, mir-620   | 2.04383 | 2.32215 | 1.94611 | 2.03705 | 1.98114 | 1.97416 | 2.45409 | 1.93537 |
| chr12, PIWIL1    | 2.17479 | 2.43046 | 1.85391 | 1.9874  | 1.98983 | 1.91298 | 2.19408 | 2.02458 |
| chr12, RAN       | 2.16397 | 2.45398 | 1.9341  | 1.97205 | 1.9809  | 1.92705 | 2.24872 | 1.99846 |
| chr13, mir-621   | 1.91403 | 1.91387 | 1.77677 | 2.03968 | 2.00274 | 2.00129 | 2.29161 | 1.99935 |
| chr13, mir-16-1  | 1.99372 | 1.89694 | 1.48091 | 2.05074 | 1.98843 | 2.08058 | 2.46628 | 1.85479 |
| chr13, mir-622   | 2.09117 | 2.40757 | 1.37766 | 1.97667 | 1.94991 | 1.91234 | 5.49649 | 1.89946 |
| chr13, mir-17,   | 1.98226 | 2.31564 | 1.82887 | 1.96391 | 1.9388  | 1.9112  | 5.45759 | 1.90865 |
| chr13, mir-623   | 1.89556 | 1.86333 | 1.74222 | 2.06748 | 1.99788 | 2.01849 | 1.85455 | 1.98727 |
| chr14, mir-208   | 1.94523 | 2.02633 | 2.64578 | 2.0345  | 2.02578 | 1.97982 | 1.80716 | 2.12266 |
| chr14, mir-624   | 1.94643 | 1.91952 | 2.58619 | 2.06655 | 2.01833 | 2.04464 | 1.68762 | 1.97738 |
| chr14, mir-625   | 1.93322 | 1.86483 | 1.90414 | 2.06333 | 2.00264 | 2.56782 | 1.86575 | 1.92058 |
| chr14, Dicer1    | 1.96654 | 1.88501 | 1.9161  | 2.03419 | 2.01511 | 2.49399 | 1.75308 | 2.00058 |
| chr14, mir-342   | 1.89198 | 1.99615 | 2.14573 | 2.03906 | 2.00958 | 2.47823 | 1.84427 | 2.03542 |
| chr14, mir-345   | 2.00111 | 2.07    | 2.23241 | 2.02556 | 1.99611 | 2.31519 | 1.81259 | 2.09167 |
| chr14, mir-770,  | 1.94712 | 1.98899 | 2.05054 | 2.00644 | 2.01265 | 2.35762 | 1.74057 | 2.05916 |
| chr14, mir-379,  | 2.00174 | 2.01326 | 1.98996 | 2.00669 | 1.99548 | 2.34487 | 1.76252 | 2.09496 |
| chr14, mir-203   | 1.93176 | 2.15206 | 2.29588 | 1.99588 | 2.01177 | 2.20294 | 1.83941 | 2.11471 |
| chr15, mir-211   | 1.95367 | 1.97378 | 2.14898 | 2.05286 | 2.06235 | 2.03204 | 1.83102 | 2.0851  |



|                 |         |         |         |         |         |         |         |         |
|-----------------|---------|---------|---------|---------|---------|---------|---------|---------|
| chr15, mir-626  | 1.95282 | 1.93835 | 1.842   | 2.11318 | 2.01341 | 2.05894 | 1.90659 | 1.92071 |
| chr15, mir-627  | 1.93449 | 1.89714 | 1.91755 | 2.09898 | 2.03184 | 2.02214 | 1.83174 | 1.9652  |
| chr15, mir-628  | 2.04212 | 1.92871 | 1.82629 | 2.09447 | 2.01508 | 2.06545 | 1.725   | 1.95174 |
| chr15, mir-190  | 1.96778 | 1.94741 | 2.00741 | 2.06215 | 2.03222 | 1.97363 | 1.82526 | 2.07563 |
| chr15, mir-422a | 1.92489 | 1.96544 | 2.13522 | 2.08256 | 2.01956 | 2.04567 | 1.91244 | 2.09056 |
| chr15, mir-629  | 2.0168  | 2.01736 | 2.10128 | 2.10304 | 2.04648 | 2.50432 | 1.93824 | 2.09952 |
| chr15, mir-630  | 1.97296 | 1.8933  | 1.86078 | 2.08774 | 2.02652 | 2.56574 | 1.81826 | 1.96852 |
| chr15, mir-631  | 1.93494 | 2.03835 | 2.12418 | 2.09367 | 2.00595 | 2.40228 | 1.87911 | 2.13101 |
| chr15, mir-184  | 1.98348 | 1.98866 | 2.05214 | 2.03705 | 2.02929 | 1.98759 | 1.81152 | 2.07571 |
| chr15, mir-549  | 1.99432 | 1.99234 | 2.11207 | 2.09126 | 2.06126 | 2.0109  | 1.77766 | 2.1464  |
| chr15, mir-7-2  | 1.97036 | 1.94179 | 2.01322 | 2.0856  | 2.04679 | 2.08536 | 1.73786 | 2.06738 |
| chr15, mir-9-3  | 1.95327 | 2.03724 | 2.10694 | 2.05959 | 2.04163 | 2.01276 | 1.79561 | 2.08643 |
| chr16, mir-662  | 2.17    | 2.18038 | 2.19115 | 2.02308 | 1.97654 | 1.94154 | 2.58962 | 2.06577 |
| chr16, mir-193b | 1.8687  | 2.12065 | 2.13956 | 2.03413 | 1.96739 | 1.98391 | 3.28207 | 2.00826 |
| chr16, mir-484  | 1.85009 | 2.0653  | 2.01348 | 2.04182 | 1.98113 | 2.00713 | 3.32991 | 1.96974 |
| chr16, mir-138- | 1.93324 | 2.15407 | 2.15176 | 2.055   | 1.99907 | 2.02046 | 1.85167 | 2.05055 |
| chr16, mir-328  | 1.90041 | 2.22143 | 2.22551 | 2.02163 | 1.97582 | 1.97765 | 1.85898 | 2.05592 |
| chr16, mir-140  | 1.85585 | 2.16805 | 2.055   | 2.0289  | 1.95573 | 1.97829 | 1.79    | 2.01671 |
| chr16, mir-768  | 1.88474 | 2.07283 | 1.91776 | 2.03803 | 1.96421 | 2.00803 | 1.77276 | 1.93421 |
| chr17, mir-22   | 1.97853 | 2.1064  | 2.36747 | 2.09413 | 2.04493 | 2.05107 | 1.8724  | 2.09547 |
| chr17, mir-132, | 1.95048 | 2.13048 | 2.30063 | 2.10984 | 2.05492 | 2.07079 | 1.89222 | 2.13095 |
| chr17, mir-195, | 1.96466 | 2.0732  | 2.26718 | 2.11942 | 2.06146 | 2.03612 | 1.89243 | 2.09495 |
| chr17, mir-324  | 1.93947 | 2.11937 | 2.33812 | 2.13214 | 2.05625 | 2.03223 | 1.88696 | 2.14393 |
| chr17, mir-33b  | 2.00611 | 2.12639 | 2.33125 | 2.06695 | 2.05556 | 2.01722 | 1.86153 | 2.17694 |
| chr17, mir-451, | 1.88352 | 1.97556 | 2.14574 | 2.01926 | 1.96407 | 2.00519 | 1.8137  | 2.06    |
| chr17, mir-423  | 1.88611 | 1.90337 | 1.94411 | 2.04484 | 1.98032 | 2.01684 | 1.84105 | 1.88558 |
| chr17, mir-193a | 1.89581 | 1.95524 | 2.19831 | 2.05927 | 2.01508 | 1.99742 | 1.84008 | 2.06177 |
| chr17, mir-632  | 1.9131  | 1.92327 | 1.96761 | 2.07044 | 1.99381 | 2.05611 | 1.8608  | 1.94381 |
| chr17, mir-152  | 1.88944 | 1.98407 | 2.18241 | 2.05222 | 2.00417 | 1.99343 | 1.84352 | 2.03278 |
| chr17, mir-10a  | 2.125   | 2.0139  | 2.18856 | 2.04051 | 2.04898 | 1.93458 | 1.84237 | 2.0472  |
| chr17, mir-196a | 1.8948  | 1.99098 | 2.16872 | 2.04059 | 2.02735 | 1.94931 | 1.8498  | 2.01824 |
| chr17, mir-142  | 1.87854 | 2.03927 | 2.20549 | 2.07049 | 2.02939 | 1.95793 | 1.84183 | 2.14781 |
| chr17, mir-454, | 1.90333 | 1.91785 | 1.97081 | 2.03593 | 1.99837 | 2.0177  | 1.83289 | 1.9343  |
| chr17, mir-21   | 1.79688 | 1.84917 | 2.04229 | 2.02339 | 1.9834  | 1.99615 | 1.84954 | 1.93376 |
| chr17, mir-633  | 1.95474 | 1.90846 | 1.91962 | 2.03641 | 1.99385 | 1.98449 | 1.77872 | 1.94167 |
| chr17, mir-634  | 1.93614 | 1.93916 | 1.98614 | 2.03529 | 2.00235 | 1.98933 | 1.72395 | 2.04891 |
| chr17, mir-548c | 1.84034 | 1.90416 | 2.06292 | 2.04607 | 1.96225 | 2.00348 | 1.78213 | 1.97809 |

|                 |         |         |         |         |         |         |         |         |
|-----------------|---------|---------|---------|---------|---------|---------|---------|---------|
| chr17, mir-635  | 1.88471 | 1.94368 | 2.11299 | 2.05    | 1.99828 | 2.01379 | 1.84126 | 2.01724 |
| chr17, mir-636  | 1.9069  | 1.93124 | 2.01664 | 2.03938 | 1.98593 | 2.02381 | 1.8569  | 1.95195 |
| chr17, mir-657, | 2.12293 | 2.11732 | 2.31878 | 1.97829 | 2.03878 | 1.9161  | 1.80415 | 2.05951 |
| chr18, mir-133a | 1.91069 | 1.81181 | 1.78354 | 2.03028 | 1.95132 | 3.5182  | 1.70458 | 2.15479 |
| chr18, mir-187  | 2.00348 | 1.89246 | 2.01058 | 2.02116 | 1.96493 | 3.51029 | 1.72174 | 2.24319 |
| chr18, mir-122a | 1.9246  | 1.8935  | 2.0476  | 2.03    | 1.9821  | 3.4327  | 2.8923  | 2.2496  |
| chr19, mir-637  | 1.95692 | 2.11436 | 2.27923 | 2.03308 | 2.06103 | 2.00795 | 1.84103 | 2.05667 |
| chr19, mir-7-3  | 1.8234  | 2.0466  | 2.2342  | 2.0268  | 1.9784  | 2.3904  | 1.8236  | 2.0592  |
| chr19, mir-638  | 1.83778 | 2.00844 | 2.15644 | 2.04222 | 2.00022 | 1.97467 | 1.85689 | 2.02378 |
| chr19, mir-199a | 1.80157 | 2.0351  | 2.24843 | 2.05255 | 1.98667 | 1.98745 | 1.82333 | 2.08706 |
| chr19, mir-24-2 | 1.95789 | 2.11942 | 2.22615 | 2.03462 | 1.99692 | 1.99135 | 1.85423 | 2.055   |
| chr19, mir-181c | 1.876   | 2.05673 | 2.30636 | 2.03418 | 2.00309 | 1.97745 | 1.81964 | 2.11345 |
| chr19, mir-639  | 1.87773 | 2.03773 | 2.20947 | 2.04373 | 2.00293 | 2.0064  | 1.86547 | 2.03573 |
| chr19, mir-640  | 1.88298 | 1.95606 | 2.16135 | 2.0826  | 1.97913 | 1.99808 | 1.88606 | 2.07269 |
| chr19, mir-641  | 1.88673 | 2.00327 | 2.25055 | 2.03564 | 2.09418 | 1.98509 | 1.82964 | 2.11327 |
| chr19, mir-330  | 1.82857 | 2.02816 | 2.24959 | 2.0398  | 2.06653 | 1.99408 | 1.81633 | 2.1051  |
| chr19, mir-642  | 1.85302 | 2.02641 | 2.22321 | 2.03925 | 2.04717 | 1.97981 | 1.7966  | 2.06792 |
| chr19, mir-769  | 1.85965 | 2.03614 | 2.29158 | 2.0286  | 2.1186  | 1.95421 | 1.78772 | 2.0907  |
| chr19, mir-150  | 1.83222 | 2.03825 | 2.29175 | 2.04064 | 2.05714 | 2.40127 | 1.86143 | 2.09286 |
| chr19, mir-99b, | 1.88628 | 2.01586 | 2.24743 | 2.05271 | 2.12029 | 2.40672 | 1.79614 | 2.12057 |
| chr19, mir-643  | 2.11848 | 1.9981  | 2.16228 | 2.02443 | 2.1638  | 2.40101 | 1.82798 | 2.00797 |
| chr19, mir-512- | 1.87928 | 2.01794 | 2.07227 | 2.04696 | 2.10072 | 2.42304 | 1.81123 | 2.07675 |
| chr20, mir-103- | 1.86735 | 2.1559  | 2.53863 | 2.04504 | 1.95273 | 2.45017 | 1.76949 | 1.93573 |
| chr20, mir-663  | 1.90577 | 2.12308 | 2.36231 | 2.05308 | 2.08846 | 2.4     | 1.76846 | 1.99    |
| chr20, mir-644  | 1.81519 | 2.16278 | 2.52676 | 2.02648 | 1.91315 | 2.46056 | 1.80722 | 1.84167 |
| chr20, mir-499  | 1.878   | 2.2732  | 2.63307 | 2.01907 | 1.99013 | 2.30667 | 1.76947 | 2.0552  |
| chr20, mir-645  | 1.86    | 2.23804 | 2.58897 | 2.05439 | 1.95243 | 2.28252 | 1.81467 | 2.01262 |
| chr20, mir-296  | 1.94316 | 2.29853 | 2.63747 | 2.03547 | 2.00084 | 2.24305 | 1.76358 | 2.07421 |
| chr20, mir-646  | 2.07255 | 2.29225 | 2.45225 | 2.05969 | 2.03765 | 2.23582 | 1.6998  | 2.05327 |
| chr20, mir-1-1, | 1.995   | 2.35156 | 2.55375 | 1.99609 | 1.94703 | 2.18328 | 1.76187 | 2.04453 |
| chr20, mir-124a | 1.93482 | 2.32446 | 2.56393 | 1.99768 | 1.98393 | 2.18946 | 1.77268 | 2.09036 |
| chr20, mir-647  | 1.99846 | 2.27115 | 2.49654 | 1.99135 | 1.92942 | 2.23481 | 1.7975  | 1.98    |
| chr21, mir-99a, | 2.07589 | 1.92388 | 2.15721 | 2.07194 | 2.0545  | 2.01248 | 1.65953 | 2.08721 |
| chr21, mir-125b | 2.12457 | 1.89648 | 2.06938 | 2.06469 | 2.02704 | 2.01383 | 1.65469 | 2.04654 |
| chr21, mir-155  | 2.0049  | 1.79959 | 2.32855 | 2.08731 | 2.03731 | 2.10062 | 1.7711  | 1.99724 |
| chr21, mir-802  | 1.96637 | 1.91863 | 2.28984 | 2.04177 | 1.99613 | 1.98702 | 1.77556 | 2.01823 |
| chr22, mir-648  | 1.9077  | 1.97068 | 2.16554 | 2.0823  | 2.02351 | 2.00527 | 2.34878 | 2.08419 |

|                   |          |          |          |         |          |         |         |          |
|-------------------|----------|----------|----------|---------|----------|---------|---------|----------|
| chr22, mir-185    | 1.97286  | 2.08343  | 2.21271  | 2.04329 | 1.99114  | 2.01414 | 2.27286 | 2.08871  |
| chr22, DGCR8-     | 1.94625  | 2.08036  | 2.11911  | 2.03759 | 1.99464  | 2.00214 | 2.25304 | 2.07545  |
| chr22, mir-649    | 1.97021  | 2.09511  | 2.24043  | 2.03234 | 2.00447  | 1.99404 | 2.18596 | 2.14383  |
| chr22, mir-130b   | 1.92702  | 2.01737  | 2.17246  | 2.07193 | 2.00386  | 2.03298 | 2.31789 | 2.06526  |
| chr22, mir-650    | 1.78154  | 2.20474  | 0.890256 | 2.17359 | 2.25923  | 1.77128 | 2.78795 | 1.81705  |
| chr22, PIWIL3     | 1.89787  | 1.94133  | 2.02441  | 2.03284 | 1.98261  | 1.97815 | 2.34569 | 1.98028  |
| chr22, mir-658,   | 1.85633  | 2.02025  | 2.21342  | 2.06038 | 1.99785  | 2.00152 | 2.29    | 2.07127  |
| chr22, mir-33     | 1.89292  | 2.03875  | 2.195    | 2.10556 | 2.00208  | 2.01583 | 2.28778 | 2.01722  |
| chr22, let-7a-3,  | 2.06294  | 2.14941  | 2.39353  | 2.02176 | 2.0649   | 1.96373 | 2.06392 | 2.18961  |
| chrX, mir-651     | 0.98032  | 0.93632  | 1.60264  | 1.04392 | 0.99528  | 1.89088 | 0.99744 | 1.05536  |
| chrX, mir-221,    | 0.943113 | 0.885189 | 1.64075  | 1.0767  | 0.99717  | 1.95208 | 1.06179 | 0.995849 |
| chrX, mir-532,    | 0.958333 | 0.935614 | 1.66123  | 1.03781 | 0.994824 | 1.87562 | 1.07316 | 1.01982  |
| chrX, mir-98, let | 0.914461 | 0.947482 | 1.74554  | 1.05662 | 0.984605 | 1.88604 | 1.07151 | 1.0213   |
| chrX, mir-223     | 0.970859 | 0.912032 | 1.68133  | 1.07484 | 1.01203  | 1.9007  | 1.11727 | 1.02117  |
| chrX, mir-421     | 0.961531 | 0.932143 | 1.61602  | 1.07173 | 1.01775  | 1.9501  | 1.04031 | 1.02204  |
| chrX, mir-545,    | 0.957642 | 0.929594 | 1.62911  | 1.06065 | 1.01276  | 1.93537 | 1.02805 | 1.01098  |
| chrX, mir-384     | 1.00018  | 0.945357 | 1.55196  | 1.05607 | 1.00786  | 1.87857 | 1.00857 | 1.01536  |
| chrX, mir-325     | 0.997273 | 0.929318 | 1.52341  | 1.04864 | 1.0025   | 1.86364 | 1.04068 | 0.998636 |
| chrX, mir-361     | 1.03183  | 0.93129  | 1.47516  | 1.07903 | 1.01043  | 1.92086 | 1.01344 | 1.02215  |
| chrX, mir-652     | 0.992056 | 0.940467 | 1.62579  | 1.0585  | 0.999346 | 1.89514 | 1.04318 | 1.0015   |
| chrX, mir-448     | 1.02563  | 0.940125 | 1.44263  | 1.04975 | 1.00675  | 1.91825 | 1.01312 | 1.01375  |
| chrX, mir-766     | 0.891413 | 0.937391 | 1.8588   | 1.04076 | 0.974892 | 1.93772 | 1.1013  | 1.01196  |
| chrX, mir-220     | 0.949269 | 0.928293 | 1.59024  | 1.04146 | 0.994878 | 1.87073 | 1.11585 | 0.998537 |
| chrX, mir-363,    | 0.938385 | 0.907154 | 1.517    | 1.03615 | 0.966769 | 1.88138 | 1.94123 | 0.971384 |
| chrX, mir-450-1   | 0.935682 | 0.925151 | 1.64977  | 1.02856 | 0.979848 | 1.89015 | 1.81886 | 0.987803 |
| chrX, mir-504     | 1.02154  | 0.896616 | 1.458    | 1.05877 | 0.983462 | 1.88885 | 1.91115 | 1.00685  |
| chrX, mir-505     | 0.980769 | 0.903077 | 1.51077  | 1.05066 | 0.99011  | 1.89121 | 1.86802 | 1.00506  |
| chrX, mir-513-1   | 0.997578 | 0.938092 | 1.54588  | 1.03686 | 0.991856 | 1.88443 | 1.89974 | 1.0249   |
| chrX, FMR1        | 0.999965 | 0.906312 | 1.48177  | 1.02546 | 0.979114 | 1.84301 | 1.95759 | 0.985426 |
| chrX, mir-224,    | 0.986667 | 0.959612 | 1.74628  | 1.04132 | 1.00163  | 1.87977 | 1.86667 | 1.0693   |
| chrX, mir-105-1   | 0.971111 | 0.923    | 1.61511  | 1.03489 | 0.994556 | 1.84756 | 2.00733 | 1.03544  |

| TUMOR ID        | 6614    | 6902    | 7041    | 7295    | 7924    | 865 Farage | FL-318  |         |
|-----------------|---------|---------|---------|---------|---------|------------|---------|---------|
| MiRNA ID        |         |         |         |         |         |            |         |         |
| chr1, mir-200b, | 2.0814  | 1.92605 | 1.99279 | 2.16605 | 2.09651 | 2.03698    | 2.11837 | 2.07814 |
| chr1, mir-551a  | 2.14677 | 2.00387 | 2.14903 | 2.26    | 2.02323 | 2.0329     | 2.0971  | 2.1329  |
| chr1, mir-34a   | 2.03853 | 1.842   | 1.8852  | 2.06373 | 2.00387 | 1.95627    | 1.75293 | 1.93973 |

|                  |         |         |         |         |         |         |         |          |
|------------------|---------|---------|---------|---------|---------|---------|---------|----------|
| chr1, mir-801    | 1.9719  | 1.70619 | 1.87    | 2.04738 | 2.02357 | 1.97595 | 1.70976 | 1.82048  |
| chr1, mir-552    | 2.05636 | 1.82208 | 1.89351 | 2.01714 | 2.10636 | 1.96286 | 1.6387  | 1.89935  |
| chr1, AGO4, A    | 1.96248 | 1.63243 | 1.82948 | 1.92768 | 1.97056 | 1.96995 | 1.61308 | 1.83379  |
| chr1, mir-30e, I | 2.00625 | 2.28426 | 1.83441 | 1.97868 | 2.04265 | 1.9675  | 1.60706 | 1.81463  |
| chr1, mir-101-1  | 2.00881 | 1.9596  | 1.91055 | 1.9977  | 2.04199 | 1.99151 | 1.67778 | 1.7773   |
| chr1, SERBP1     | 2.01516 | 1.92924 | 1.87848 | 1.95027 | 2.02799 | 1.96071 | 2.06071 | 1.61141  |
| chr1, mir-186    | 2.06812 | 1.90644 | 1.93436 | 1.90195 | 2.09564 | 2.0306  | 1.64477 | 1.54067  |
| chr1, mir-137    | 2.07824 | 1.87773 | 1.9296  | 1.86966 | 2.06324 | 2.07102 | 1.82642 | 1.74153  |
| chr1, mir-553    | 1.97872 | 1.94384 | 1.86176 | 1.97424 | 2.04912 | 1.97584 | 1.59904 | 1.81912  |
| chr1, mir-197    | 1.99028 | 1.93496 | 1.89099 | 1.94397 | 2.01    | 1.95411 | 1.5827  | 1.81865  |
| chr1, DDX20      | 2.0207  | 1.9887  | 1.88384 | 1.984   | 2.03081 | 1.96746 | 1.64989 | 1.88292  |
| chr1, mir-554    | 1.9494  | 1.9519  | 1.80988 | 1.91833 | 2.25095 | 1.9056  | 2.06    | 1.79714  |
| chr1, mir-92b    | 2.00222 | 2.42741 | 1.84657 | 2.13593 | 2.2637  | 1.90148 | 2.06787 | 1.97935  |
| chr1, mir-555    | 1.90589 | 2.39089 | 1.75205 | 1.9225  | 2.24491 | 1.88107 | 2.00768 | 1.77384  |
| chr1, mir-9-1    | 1.93685 | 2.44378 | 1.88764 | 1.99417 | 2.27244 | 1.88543 | 2.04362 | 1.85772  |
| chr1, mir-765    | 1.9736  | 2.43306 | 1.93063 | 2.04153 | 2.2764  | 1.88721 | 2.04739 | 1.90487  |
| chr1, mir-556    | 1.96854 | 3.18314 | 1.91847 | 2.25095 | 2.33862 | 1.87693 | 2.0673  | 1.7119   |
| chr1, mir-557    | 1.92819 | 2.81622 | 1.89583 | 2.20504 | 2.25787 | 1.90307 | 2.02858 | 1.74961  |
| chr1, mir-214, I | 1.93318 | 2.92651 | 1.87626 | 2.18918 | 2.11226 | 1.87595 | 2.01759 | 1.7439   |
| chr1, mir-488    | 2.0217  | 2.21731 | 1.95036 | 2.3527  | 2.06376 | 1.90794 | 2.05886 | 1.65645  |
| chr1, mir-181b-1 | 1.91804 | 2.09682 | 1.86351 | 2.10649 | 2.09034 | 1.91074 | 1.95122 | 1.73818  |
| chr1, mir-135b-1 | 1.98918 | 2.30306 | 1.89939 | 2.03449 | 2.21704 | 1.88439 | 2.05245 | 1.88245  |
| chr1, mir-29c, I | 2.01262 | 1.72019 | 1.93131 | 1.96694 | 2.23031 | 1.94544 | 2.01256 | 1.73669  |
| chr1, mir-205    | 2.05615 | 1.79716 | 1.97523 | 1.99973 | 2.31184 | 1.93349 | 2.1356  | 1.67514  |
| chr1, mir-215, I | 1.6277  | 1.56148 | 1.96443 | 1.84811 | 1.985   | 1.9823  | 2.04295 | 1.7123   |
| chr2, mir-558    | 1.96518 | 2.38145 | 1.82955 | 1.79473 | 1.91864 | 1.95136 | 2.01318 | 0.907637 |
| chr2, mir-559    | 1.93713 | 2.69149 | 1.85404 | 1.87936 | 1.94    | 1.90734 | 2.13085 | 1.02702  |
| chr2, mir-217, I | 1.99619 | 2.44105 | 1.82657 | 1.82634 | 1.99015 | 1.90552 | 2.0844  | 1.78821  |
| chr2, mir-560    | 2.47444 | 2.10333 | 1.96778 | 2.02889 | 2.28111 | 1.68889 | 1.77778 | 1.69667  |
| chr2, mir-128a   | 1.98098 | 1.87872 | 1.87947 | 1.87865 | 1.94293 | 2.82173 | 1.65383 | 1.78601  |
| chr2, mir-10b    | 2.08378 | 2.02697 | 1.9595  | 2.01588 | 2.09202 | 2.75899 | 1.76798 | 1.8237   |
| chr2, mir-561    | 2.11187 | 2.23194 | 1.94892 | 1.94561 | 2.04813 | 2.98252 | 1.74144 | 1.65353  |
| chr2, mir-26b    | 2.01288 | 2.1217  | 1.96068 | 2.08322 | 2.01746 | 2.50203 | 1.95576 | 1.99102  |
| chr2, mir-375    | 2.03269 | 2.3128  | 1.91247 | 2.16806 | 2.07613 | 2.59183 | 1.79161 | 2.00161  |
| chr2, mir-153-1  | 2.01513 | 2.29705 | 1.90769 | 2.16192 | 2.05513 | 2.59423 | 1.75538 | 1.995    |
| chr2, mir-562    | 1.963   | 1.897   | 1.86383 | 1.8915  | 1.96367 | 2.77433 | 1.6245  | 1.77367  |
| chr2, mir-149    | 2.0725  | 1.96525 | 2.00875 | 2.011   | 2.03775 | 2.474   | 1.88475 | 1.9635   |

|                  |         |         |         |         |         |         |         |         |
|------------------|---------|---------|---------|---------|---------|---------|---------|---------|
| chr3, mir-563    | 1.97698 | 1.90381 | 1.85302 | 1.8773  | 2.02429 | 1.94159 | 2.13    | 1.78778 |
| chr3, mir-128b   | 2.06524 | 1.94238 | 1.90829 | 1.90671 | 2.07262 | 2.00238 | 2.0872  | 1.74951 |
| chr3, mir-26a-1  | 1.99476 | 1.92694 | 1.92306 | 1.97161 | 2.04895 | 1.95137 | 2.16468 | 1.86056 |
| chr3, mir-138-1  | 2.0446  | 2.08857 | 1.92722 | 2.0454  | 2.11659 | 1.94476 | 2.14611 | 1.80754 |
| chr3, mir-564    | 2.03185 | 2.02065 | 1.88772 | 2.00728 | 2.08272 | 1.97446 | 2.15489 | 1.7863  |
| chr3, mir-565    | 2.0129  | 1.95331 | 1.87202 | 1.99137 | 2.00766 | 1.98556 | 2.10605 | 1.80661 |
| chr3, mir-425, l | 1.7799  | 2.11758 | 1.88707 | 1.78202 | 2.10061 | 1.96455 | 2.06687 | 1.86121 |
| chr3, mir-566    | 2.03051 | 1.98203 | 1.93339 | 1.79695 | 2.05983 | 1.98813 | 2.21627 | 1.9717  |
| chr3, let-7g, mi | 2.02304 | 2.00403 | 1.88271 | 1.68006 | 2.05287 | 1.9737  | 2.09746 | 1.91575 |
| chr3, mir-567    | 2.01898 | 2.17263 | 1.87905 | 1.93949 | 2.00686 | 1.96766 | 2.08657 | 1.64774 |
| chr3, mir-568    | 2.01395 | 1.99121 | 1.85019 | 1.96771 | 1.99994 | 1.97847 | 2.03166 | 1.81013 |
| chr3, mir-198    | 2.02704 | 1.70952 | 1.9212  | 1.9428  | 2.0496  | 1.97072 | 2.09744 | 1.86296 |
| chr3, mir-15b, l | 1.97981 | 2.63292 | 1.82266 | 2.55533 | 1.96864 | 1.95987 | 2.0276  | 1.56117 |
| chr3, mir-551b   | 2.01291 | 2.64233 | 1.86767 | 2.38359 | 2.0034  | 1.94825 | 2.13777 | 1.63845 |
| chr3, mir-569    | 2.00622 | 2.762   | 1.87    | 2.47489 | 2.0477  | 1.91733 | 2.08185 | 1.65711 |
| chr3, mir-28     | 1.97142 | 2.13479 | 1.82663 | 2.53639 | 1.94698 | 1.94645 | 1.87319 | 1.71438 |
| chr3, mir-570    | 2.075   | 1.61474 | 1.79395 | 1.58    | 1.57684 | 2.68868 | 1.84105 | 1.81342 |
| chr4, mir-571    | 2.10353 | 2.21118 | 2.16235 | 1.88529 | 1.94    | 1.21941 | 1.81412 | 1.86    |
| chr4, mir-95     | 2.07671 | 2.38614 | 2.17257 | 2.05029 | 2.10829 | 1.20714 | 1.78529 | 1.92971 |
| chr4, mir-572    | 2.16911 | 2.38987 | 2.2138  | 2.09873 | 2.13114 | 1.2057  | 1.84481 | 1.90279 |
| chr4, mir-218-1  | 2.14077 | 1.65813 | 2.28503 | 1.91574 | 2.10219 | 2.07503 | 1.89794 | 1.63161 |
| chr4, mir-573    | 2.10087 | 1.72527 | 2.23331 | 1.98189 | 2.05417 | 2.0122  | 1.56953 | 1.61032 |
| chr4, mir-574    | 2.00091 | 1.92202 | 2.13939 | 1.99818 | 2.00212 | 1.93879 | 1.75101 | 1.82646 |
| chr4, mir-575    | 2.05893 | 2.05816 | 2.13058 | 2.0367  | 2.05981 | 1.95359 | 1.63951 | 1.07942 |
| chr4, mir-576    | 2.0269  | 1.88991 | 2.16379 | 1.87681 | 1.99155 | 1.97509 | 1.52164 | 1.70784 |
| chr4, mir-367, l | 1.99742 | 1.89159 | 2.12492 | 1.88811 | 1.98167 | 1.97485 | 1.60538 | 1.73326 |
| chr4, mir-577    | 2.09036 | 1.93711 | 2.19307 | 1.88241 | 2.02422 | 2.03325 | 1.61283 | 1.65078 |
| chr4, mir-578    | 2.07714 | 1.88651 | 2.17754 | 1.93857 | 1.89095 | 1.99952 | 1.62032 | 1.69087 |
| chr5, Droscha    | 1.97905 | 2.46425 | 1.83904 | 1.88691 | 1.96493 | 1.90255 | 2.04317 | 2.1272  |
| chr5, mir-579    | 1.90599 | 2.36844 | 1.81191 | 1.81544 | 1.88966 | 1.87095 | 1.9302  | 2.19592 |
| chr5, mir-580    | 1.976   | 2.33    | 1.82432 | 1.8136  | 1.93472 | 1.934   | 2.01296 | 2.11776 |
| chr5, mir-581    | 2.00664 | 1.90157 | 1.87537 | 1.89425 | 1.97992 | 1.96388 | 2.15373 | 2.13299 |
| chr5, mir-449, l | 1.97942 | 1.91123 | 1.84246 | 1.89203 | 1.92087 | 1.90761 | 2.12312 | 2.36565 |
| chr5, mir-582    | 1.9965  | 1.869   | 1.88183 | 1.843   | 1.96692 | 1.90408 | 2.04642 | 2.10142 |
| chr5, mir-9-2    | 2.00775 | 1.91463 | 1.86413 | 1.87375 | 1.97419 | 1.94856 | 2.11925 | 2.20156 |
| chr5, mir-583    | 1.97007 | 1.92699 | 1.83195 | 1.9085  | 1.94256 | 1.93699 | 2.07256 | 3.72917 |
| chr5, mir-584    | 2.01385 | 2.01976 | 1.81952 | 1.96458 | 2.01783 | 1.89482 | 2.05988 | 2.33193 |

|                  |         |         |         |         |         |         |         |         |
|------------------|---------|---------|---------|---------|---------|---------|---------|---------|
| chr5, mir-143, l | 2.01584 | 2.03436 | 1.85386 | 2.00931 | 2.06733 | 1.91059 | 2.08564 | 2.3303  |
| chr5, mir-378    | 1.97157 | 1.9394  | 1.82892 | 1.94831 | 1.99542 | 1.91615 | 2.13337 | 2.3559  |
| chr5, mir-146a   | 1.99697 | 1.96495 | 1.85374 | 1.98889 | 1.98768 | 1.93545 | 2.05455 | 2.18192 |
| chr5, mir-103-1  | 1.98879 | 1.87818 | 1.88038 | 1.93076 | 1.98288 | 1.93553 | 2.01667 | 2.1297  |
| chr5, mir-218-2  | 2.04355 | 1.99206 | 1.91738 | 1.96383 | 2.01439 | 1.9442  | 2.17748 | 2.20327 |
| chr5, mir-585    | 2.01355 | 2.01973 | 1.87918 | 1.92173 | 2.005   | 1.92418 | 2.05336 | 2.27891 |
| chr5, mir-340    | 1.94645 | 1.88226 | 1.80323 | 1.92075 | 1.92903 | 1.89215 | 2.0214  | 2.46731 |
| chr6, mir-548a-  | 2.31878 | 1.92439 | 1.86301 | 1.9026  | 2.1448  | 1.9613  | 1.98748 | 1.91927 |
| chr6, mir-219-1  | 2.28041 | 2.12165 | 1.84598 | 2.1267  | 2.21062 | 1.28629 | 2.08959 | 1.9301  |
| chr6, XPO5       | 1.94901 | 1.96695 | 1.82436 | 1.96215 | 2.12702 | 1.64346 | 2.01971 | 1.83978 |
| chr6, mir-586    | 1.99741 | 1.845   | 1.85431 | 1.81845 | 2.16138 | 1.07862 | 1.59457 | 1.64077 |
| chr6, mir-206, l | 1.97741 | 1.9754  | 1.82942 | 1.93568 | 2.14885 | 1.07496 | 2.0241  | 1.91885 |
| chr6, mir-30c-2  | 2.05098 | 1.91409 | 1.91549 | 1.5072  | 1.83473 | 2.01276 | 2.2425  | 1.81288 |
| chr6, mir-587    | 2.07655 | 2.37682 | 1.90618 | 2.07145 | 1.88391 | 1.99491 | 1.23082 | 1.97945 |
| chr6, mir-548b   | 2.09496 | 2.31239 | 1.93664 | 1.99124 | 1.88089 | 2.05345 | 1.14805 | 1.87257 |
| chr6, mir-588    | 2.10066 | 2.06344 | 1.92934 | 1.84525 | 1.81721 | 2.08197 | 1.18754 | 1.77246 |
| chr6, mir-548a-  | 2.07543 | 2.08094 | 1.9652  | 1.65921 | 1.85921 | 2.05095 | 2.38882 | 1.8248  |
| chr7, mir-339    | 1.98132 | 2.10237 | 1.93974 | 2.03026 | 1.99158 | 2.29421 | 2.63079 | 2.72684 |
| chr7, mir-589    | 1.9249  | 2.12137 | 1.77529 | 2.06843 | 1.94549 | 2.43373 | 2.47039 | 3.23157 |
| chr7, mir-148a   | 1.89771 | 1.84135 | 1.75708 | 1.91292 | 1.88938 | 2.63573 | 2.43229 | 2.55625 |
| chr7, mir-196b   | 1.95542 | 1.95198 | 1.84573 | 1.9124  | 1.94583 | 2.56594 | 2.65031 | 2.48    |
| chr7, mir-550-1  | 1.86938 | 1.81457 | 1.77469 | 1.89025 | 1.8421  | 2.68025 | 2.38704 | 2.43049 |
| chr7, has-mir-5  | 1.94000 | 1.91000 | 1.77000 | 1.94000 | 1.91000 | 2.72000 | 2.44000 | 2.40000 |
| chr7, mir-590    | 1.85871 | 1.84495 | 1.73151 | 1.4828  | 1.83978 | 2.51839 | 2.43871 | 2.36226 |
| chr7, mir-653, l | 1.87888 | 1.77725 | 1.75062 | 1.72706 | 1.84006 | 2.65519 | 17.2747 | 2.42869 |
| chr7, mir-591    | 1.93416 | 1.80576 | 1.78672 | 1.81648 | 1.93264 | 2.7136  | 1.52912 | 2.24896 |
| chr7, mir-25, m  | 1.85779 | 1.98177 | 1.71708 | 1.97823 | 1.91133 | 2.39558 | 1.54867 | 2.48186 |
| chr7, mir-592    | 1.93877 | 1.87208 | 1.82362 | 1.81523 | 1.95062 | 2.68777 | 1.59554 | 1.988   |
| chr7, SDN1, m    | 1.90742 | 1.87311 | 1.78319 | 1.83337 | 1.88932 | 2.60104 | 1.5807  | 1.93782 |
| chr7, mir-129-1  | 1.93157 | 1.93831 | 1.78303 | 1.93494 | 1.93899 | 2.50506 | 1.65517 | 2.01506 |
| chr7, mir-182, l | 1.93434 | 1.95212 | 1.84818 | 1.99232 | 1.95343 | 2.46939 | 1.73192 | 2.04202 |
| chr7, mir-335    | 1.93102 | 1.91703 | 1.82617 | 1.90633 | 1.89672 | 2.63961 | 1.69078 | 1.90898 |
| chr7, mir-29a, l | 1.90505 | 1.86905 | 1.7839  | 1.882   | 1.89432 | 2.63695 | 1.536   | 1.8619  |
| chr7, mir-490    | 1.9471  | 1.78888 | 1.81462 | 1.75172 | 1.94538 | 2.74929 | 1.6284  | 1.69355 |
| chr7, has-mir-5  | 1.92155 | 1.89988 | 1.78607 | 1.89191 | 1.8981  | 2.61286 | 1.62071 | 1.87429 |
| chr7, mir-671    | 1.95538 | 1.95567 | 1.85856 | 2.01135 | 1.95673 | 2.47    | 1.73577 | 1.96961 |
| chr7, mir-153-2  | 1.92163 | 1.90512 | 1.84686 | 1.90593 | 1.9314  | 2.58593 | 1.68674 | 1.97256 |

|                 |         |         |         |         |         |         |         |         |
|-----------------|---------|---------|---------|---------|---------|---------|---------|---------|
| chr7, mir-595   | 1.9679  | 1.96802 | 1.81259 | 1.9658  | 1.99815 | 2.59383 | 1.71654 | 2.06753 |
| chr8, mir-596   | 2.16884 | 2.03783 | 2.00725 | 2.02073 | 2.15275 | 2.84696 | 1.2713  | 1.74449 |
| chr8, mir-597   | 2.06676 | 1.9389  | 1.92841 | 1.92897 | 2.02131 | 2.89241 | 1.14642 | 1.73959 |
| chr8, mir-124a- | 2.07286 | 2.09741 | 1.93678 | 2.01179 | 2.05911 | 2.7433  | 1.26589 | 1.87089 |
| chr8, mir-598   | 2.0808  | 2.07954 | 1.90655 | 2.0692  | 2.08046 | 2.66448 | 1.2408  | 1.97954 |
| chr8, mir-383   | 2.17    | 1.99355 | 1.98227 | 2.01136 | 2.09891 | 3.01509 | 1.18545 | 1.65345 |
| chr8, mir-320,  | 2.01081 | 2.00811 | 1.91079 | 1.87622 | 2.00794 | 2.74442 | 1.22041 | 1.90462 |
| chr8, mir-486   | 2.04376 | 2.008   | 1.90718 | 2.07471 | 2.10259 | 2.56035 | 1.78059 | 1.93035 |
| chr8, mir-124a- | 2.08051 | 1.94564 | 1.94493 | 1.91846 | 2.05782 | 2.83782 | 3.61134 | 1.66513 |
| chr8, mir-599   | 2.00134 | 1.83544 | 1.88591 | 1.77597 | 1.96369 | 2.88255 | 1.61698 | 1.63181 |
| chr8, mir-548a- | 2.03484 | 1.94975 | 1.90205 | 1.88336 | 2.00762 | 2.83041 | 1.57656 | 1.70148 |
| chr8, mir-548d- | 1.91134 | 1.84731 | 1.79851 | 1.87784 | 1.91433 | 2.67888 | 1.09709 | 1.66978 |
| chr8, mir-30b,  | 1.94882 | 1.86119 | 1.83026 | 1.90132 | 1.94428 | 2.80961 | 1.05382 | 1.70454 |
| chr8, AGO2      | 1.95701 | 1.91408 | 1.85379 | 1.95627 | 1.96908 | 2.61478 | 1.20438 | 1.86932 |
| chr8, mir-151   | 1.90875 | 1.81158 | 1.82    | 1.84467 | 1.86883 | 2.71383 | 1.09183 | 1.80875 |
| chr8, mir-661   | 2.07189 | 2.1127  | 1.94216 | 2.12568 | 2.04838 | 2.29    | 2.72865 | 1.98297 |
| chr9, mir-101-2 | 1.68192 | 2.05119 | 1.91821 | 1.96993 | 1.98689 | 2.85464 | 1.18086 | 1.88311 |
| chr9, mir-491   | 2.03605 | 1.98627 | 1.93694 | 1.95933 | 1.9997  | 2.91209 | 1.17388 | 1.70731 |
| chr9, mir-31    | 2.07873 | 1.33924 | 1.94983 | 1.88492 | 2.02127 | 2.94526 | 1.16237 | 1.67    |
| chr9, mir-204   | 2.05759 | 2.00066 | 1.92285 | 1.94314 | 2.05832 | 2.79985 | 1.66825 | 1.70584 |
| chr9, mir-7-1   | 2.02367 | 1.93833 | 1.87708 | 2.00925 | 1.96442 | 2.78133 | 1.61325 | 1.61342 |
| chr9, let-7a-1, | 1.99938 | 1.91124 | 1.82526 | 1.92536 | 1.96773 | 2.81155 | 1.61742 | 1.67062 |
| chr9, mir-23b,  | 2.04743 | 2.02305 | 1.91676 | 2.01257 | 2.05419 | 2.71362 | 1.7421  | 1.9019  |
| chr9, mir-32    | 2.00664 | 1.9482  | 1.8768  | 1.96031 | 1.9875  | 2.81258 | 1.59867 | 1.79625 |
| chr9, mir-455   | 2.05219 | 2.09105 | 1.92152 | 2.06133 | 2.08095 | 2.54143 | 1.75381 | 1.91629 |
| chr9, mir-147   | 1.98281 | 2.02406 | 1.86271 | 1.92187 | 2.00052 | 2.63365 | 1.59635 | 1.83094 |
| chr9, mir-600   | 1.96518 | 1.91803 | 1.83328 | 1.94402 | 1.95774 | 2.71555 | 1.60263 | 1.80883 |
| chr9, mir-601   | 1.98229 | 2.01969 | 1.8549  | 2.03646 | 2.02427 | 2.58802 | 1.68156 | 1.97208 |
| chr9, mir-181a- | 1.93259 | 1.89345 | 1.7769  | 1.90569 | 1.89457 | 2.67888 | 1.51328 | 1.83819 |
| chr9, mir-199b  | 2.01364 | 2.07582 | 1.88327 | 2.05709 | 2.02218 | 2.44218 | 1.73764 | 1.94164 |
| chr9, mir-219-2 | 2.00224 | 2.09342 | 1.83197 | 2.09934 | 2.02803 | 2.57329 | 1.73329 | 1.89342 |
| chr9, mir-126   | 2.08889 | 2.05111 | 2.01704 | 2.21074 | 2.0837  | 2.36407 | 2.51185 | 2.10296 |
| chr9, mir-602   | 2.04368 | 1.96342 | 2.03974 | 2.03368 | 2.02789 | 2.52474 | 2.74868 | 2.22526 |
| chr10, mir-511- | 2.06    | 2.155   | 1.9     | 2.06    | 2.035   | 2.005   | 1.58    | 1.815   |
| chr10, mir-603  | 2.08273 | 2.0143  | 1.94273 | 2.01893 | 2.05917 | 2.04446 | 1.70281 | 1.78438 |
| chr10, mir-604  | 2.01859 | 1.94807 | 1.91792 | 1.92422 | 2.06333 | 1.95548 | 1.66163 | 1.67822 |
| chr10, mir-605  | 2.06613 | 1.9611  | 1.90496 | 1.87146 | 2.04161 | 2.01153 | 1.1408  | 1.67139 |

|                 |         |         |         |         |         |         |         |         |
|-----------------|---------|---------|---------|---------|---------|---------|---------|---------|
| chr10, mir-606  | 2.02882 | 1.98323 | 1.90237 | 1.90634 | 1.98817 | 1.9314  | 1.64613 | 1.78473 |
| chr10, mir-346  | 2.05784 | 2.07973 | 1.85568 | 2.0077  | 2.09162 | 1.94608 | 1.69716 | 1.99689 |
| chr10, mir-107  | 1.99202 | 2.22289 | 1.87158 | 1.89939 | 1.98658 | 1.97491 | 1.61921 | 1.84535 |
| chr10, mir-607  | 1.96608 | 2.24938 | 1.84206 | 1.94876 | 1.92969 | 1.9466  | 1.65773 | 1.85485 |
| chr10, mir-608  | 2.02521 | 2.29488 | 1.86984 | 2.05595 | 2.0138  | 1.95289 | 1.65124 | 1.91595 |
| chr10, mir-146b | 2.03274 | 2.1721  | 1.87226 | 2.09274 | 2.0329  | 1.97903 | 1.73532 | 1.95855 |
| chr10, mir-609  | 1.97858 | 2.1823  | 1.85885 | 1.91628 | 1.95035 | 1.94566 | 1.59248 | 1.79885 |
| chr10, mir-202  | 2.06073 | 1.84585 | 2.01781 | 2.11805 | 1.90537 | 1.97098 | 1.99976 | 2.09756 |
| chr11, mir-210  | 2.0175  | 2.02091 | 1.945   | 2.04727 | 2.00091 | 1.98295 | 1.64114 | 1.99659 |
| chr11, mir-483  | 2.03379 | 2.01803 | 1.91515 | 2.01606 | 2.02409 | 1.97167 | 1.4753  | 1.99273 |
| chr11, mir-610  | 2.06137 | 1.86691 | 1.92993 | 1.86007 | 2.01633 | 2.00554 | 1.61842 | 1.57719 |
| chr11, mir-129a | 2.01993 | 1.99238 | 1.87958 | 1.98231 | 2.02615 | 1.94315 | 1.65301 | 1.81378 |
| chr11, mir-130a | 1.99724 | 1.96092 | 1.86839 | 1.99103 | 2.00621 | 2.73046 | 1.68632 | 1.8731  |
| chr11, mir-611  | 2.02863 | 2.01205 | 1.89983 | 2.04393 | 1.99009 | 2.62256 | 1.76744 | 1.85111 |
| chr11, mir-192  | 2.00672 | 2.06069 | 1.85741 | 2.0831  | 2.01776 | 2.52569 | 1.77397 | 1.89534 |
| chr11, mir-612  | 1.99065 | 1.98675 | 1.79766 | 2.02312 | 1.92377 | 2.67416 | 1.47961 | 1.66922 |
| chr11, MALAT1   | 1.97745 | 1.90214 | 1.8148  | 2.01939 | 1.87776 | 2.76827 | 1.45122 | 1.63102 |
| chr11, mir-139  | 2.0794  | 2.19458 | 1.95072 | 2.1641  | 2.08578 | 2.5141  | 1.75916 | 1.97964 |
| chr11, mir-326  | 2.05236 | 2.10569 | 1.89153 | 2.12861 | 2.09264 | 2.55486 | 1.63028 | 1.91653 |
| chr11, PIWIL4   | 2.01353 | 1.9842  | 1.90902 | 1.89654 | 2.00464 | 2.81719 | 1.69603 | 1.70058 |
| chr11, mir-34b  | 1.93274 | 1.89925 | 1.81979 | 1.88343 | 1.91788 | 2.76281 | 1.5737  | 1.85658 |
| chr11, mir-125b | 2.00839 | 2.23833 | 1.84714 | 1.88232 | 1.9806  | 2.84833 | 1.60405 | 1.75917 |
| chr11, let-7a-2 | 2.00236 | 2.30099 | 1.8467  | 1.91593 | 1.98764 | 2.81637 | 1.61016 | 1.77747 |
| chr12, mir-200c | 1.95682 | 1.97122 | 1.81916 | 2.06477 | 1.96047 | 1.89888 | 1.96187 | 1.89028 |
| chr12, mir-613  | 1.97543 | 1.93309 | 1.78963 | 1.92593 | 1.9737  | 1.89444 | 1.93617 | 1.74272 |
| chr12, mir-614  | 1.99982 | 2.02851 | 1.82702 | 1.985   | 2.00272 | 1.90237 | 1.95789 | 1.81649 |
| chr12, mir-196a | 1.95972 | 1.92271 | 1.85794 | 1.96477 | 1.9172  | 1.83458 | 2.01159 | 1.83822 |
| chr12, mir-615  | 1.94262 | 2.00664 | 1.77918 | 1.96385 | 1.9341  | 1.81025 | 2.0977  | 1.82139 |
| chr12, mir-148b | 1.87491 | 1.92246 | 1.74119 | 1.92627 | 1.94881 | 1.84525 | 1.84644 | 1.82483 |
| chr12, mir-616  | 1.88152 | 1.90061 | 1.79344 | 1.93869 | 2.14232 | 1.83475 | 1.8504  | 1.74384 |
| chr12, mir-26a  | 1.89409 | 1.85252 | 1.79748 | 1.91574 | 2.16426 | 1.84765 | 1.87583 | 1.74983 |
| chr12, let-7i   | 1.92111 | 1.7787  | 1.79951 | 1.80352 | 2.18963 | 1.90864 | 1.83253 | 1.50296 |
| chr12, mir-548c | 1.90175 | 1.809   | 1.7905  | 1.87767 | 2.15842 | 1.86983 | 1.96733 | 1.65275 |
| chr12, mir-617  | 1.98927 | 1.82606 | 1.83467 | 1.85482 | 2.28978 | 1.94453 | 1.93387 | 1.73168 |
| chr12, mir-618  | 1.99676 | 1.83345 | 1.86965 | 1.86545 | 2.27697 | 1.93786 | 1.96572 | 1.71221 |
| chr12, mir-492  | 1.97956 | 2.00882 | 1.83485 | 1.96662 | 2.2575  | 1.86779 | 1.89294 | 1.78868 |
| chr12, mir-331  | 1.93351 | 1.84412 | 1.80015 | 1.8613  | 2.15718 | 1.91214 | 1.9084  | 1.74924 |



|                   |         |         |         |         |         |         |         |         |
|-------------------|---------|---------|---------|---------|---------|---------|---------|---------|
| chr12, mir-135a   | 1.99867 | 1.9148  | 1.85893 | 1.8552  | 2.31713 | 1.93287 | 1.9704  | 1.64007 |
| chr12, mir-619    | 1.96733 | 1.98888 | 1.81371 | 2.01638 | 2.26517 | 1.89957 | 1.85328 | 1.85983 |
| chr12, mir-620    | 1.94926 | 1.84993 | 1.79658 | 1.85154 | 2.21691 | 1.92825 | 1.80544 | 1.7096  |
| chr12, PIWIL1     | 2.00155 | 1.9408  | 1.90479 | 1.91546 | 2.29651 | 1.92718 | 2.02449 | 1.7629  |
| chr12, RAN        | 1.975   | 1.91808 | 1.8141  | 1.91141 | 2.26731 | 1.89923 | 2.00359 | 1.75936 |
| chr13, mir-621    | 2.01097 | 1.98177 | 1.83339 | 1.95548 | 1.98161 | 1.9321  | 1.82645 | 2.58436 |
| chr13, mir-16-1   | 1.98314 | 1.46033 | 1.89562 | 1.82909 | 1.89984 | 2.01248 | 2.09744 | 2.25397 |
| chr13, mir-622    | 1.9909  | 1.74595 | 2.15144 | 1.71577 | 1.95018 | 1.9427  | 1.8345  | 2.19991 |
| chr13, mir-17, 1  | 1.95045 | 1.79113 | 2.04391 | 1.82872 | 2.06932 | 1.87436 | 1.67278 | 2.18173 |
| chr13, mir-623    | 1.97131 | 1.9699  | 2.07495 | 1.99444 | 1.94273 | 1.9395  | 1.79566 | 2.53808 |
| chr14, mir-208    | 2.02679 | 2.04128 | 1.91835 | 2.0155  | 2.0378  | 1.94459 | 1.69092 | 1.89165 |
| chr14, mir-624    | 2.00607 | 1.94226 | 1.88928 | 1.94667 | 1.9644  | 1.97667 | 1.62179 | 1.78917 |
| chr14, mir-625    | 1.9792  | 1.88264 | 1.82425 | 1.92379 | 1.93931 | 2.00448 | 1.59862 | 1.79943 |
| chr14, Dicer1     | 2.00428 | 1.93371 | 1.85879 | 1.9238  | 1.97259 | 1.95329 | 1.51092 | 1.82576 |
| chr14, mir-342    | 2.01906 | 2.0549  | 1.86646 | 2.03229 | 2.02104 | 1.9675  | 1.68354 | 1.94646 |
| chr14, mir-345    | 2.04852 | 1.99481 | 1.95833 | 2.11093 | 2.01204 | 1.95685 | 1.91741 | 2.00445 |
| chr14, mir-770, 1 | 2.03627 | 2.00795 | 1.90678 | 1.98822 | 2.02644 | 1.95426 | 1.74446 | 1.90097 |
| chr14, mir-379, 1 | 2.01235 | 2.03974 | 1.92922 | 1.98865 | 2.03878 | 1.93944 | 1.77122 | 1.874   |
| chr14, mir-203    | 2.06941 | 2.08706 | 2.02382 | 2.13441 | 2.07441 | 1.95294 | 1.99794 | 2.04853 |
| chr15, mir-211    | 2.06061 | 2.10704 | 1.89275 | 2.02582 | 2.05816 | 1.99755 | 1.67194 | 1.98622 |
| chr15, mir-626    | 1.98341 | 1.89659 | 1.89753 | 1.92341 | 1.95647 | 2.02071 | 1.69859 | 1.81082 |
| chr15, mir-627    | 1.98867 | 1.96755 | 1.84867 | 1.95959 | 1.98357 | 1.99867 | 1.63418 | 1.83673 |
| chr15, mir-628    | 2.05288 | 1.87098 | 1.92326 | 1.91803 | 2.00091 | 2.02364 | 1.65689 | 1.83553 |
| chr15, mir-190    | 2.0403  | 2.0643  | 1.89467 | 1.964   | 2.03126 | 1.96156 | 1.72733 | 1.83548 |
| chr15, mir-422a   | 2.04467 | 2.05933 | 1.879   | 2.06878 | 2.05022 | 1.97156 | 1.74478 | 1.943   |
| chr15, mir-629    | 2.048   | 2.11096 | 1.90328 | 2.08328 | 2.06864 | 1.9712  | 1.73728 | 2.01088 |
| chr15, mir-630    | 2.01896 | 1.93278 | 1.86652 | 1.95139 | 1.972   | 1.99626 | 1.63757 | 1.79991 |
| chr15, mir-631    | 2.06924 | 2.05696 | 1.9038  | 2.09899 | 2.03646 | 1.98975 | 1.81759 | 1.91329 |
| chr15, mir-184    | 2.06188 | 2.03741 | 1.9183  | 2.01964 | 2.06179 | 2.0025  | 2.04973 | 1.97696 |
| chr15, mir-549    | 2.09622 | 2.07982 | 1.89234 | 2.0818  | 2.07406 | 1.99964 | 2.07622 | 1.87802 |
| chr15, mir-7-2    | 2.02274 | 1.995   | 1.88572 | 2.07631 | 2.0319  | 1.99428 | 2.18083 | 1.78917 |
| chr15, mir-9-3    | 2.06194 | 2.07786 | 1.91184 | 2.08694 | 2.04816 | 1.98123 | 2.12153 | 1.90326 |
| chr16, mir-662    | 2.02769 | 2.06962 | 2.02308 | 2.09308 | 2.05192 | 1.98385 | 2.39538 | 1.99192 |
| chr16, mir-193b   | 1.97826 | 2.00087 | 1.85141 | 2.02598 | 1.98272 | 1.93206 | 1.64598 | 1.85804 |
| chr16, mir-484    | 2.77165 | 1.9493  | 1.83757 | 1.98    | 1.93496 | 1.94957 | 1.65444 | 1.70365 |
| chr16, mir-138-1  | 2.00074 | 2.00287 | 1.90759 | 2.06657 | 2.00667 | 1.94722 | 1.73833 | 1.97241 |
| chr16, mir-328    | 2.03949 | 2.0049  | 1.95133 | 2.07255 | 2.04755 | 1.93327 | 1.88541 | 2.41276 |

|                 |         |         |         |         |         |         |         |         |
|-----------------|---------|---------|---------|---------|---------|---------|---------|---------|
| chr16, mir-140  | 1.98354 | 2.00464 | 1.85841 | 2.01549 | 1.96695 | 1.91341 | 1.72414 | 2.51488 |
| chr16, mir-768  | 1.96151 | 1.86888 | 1.82546 | 1.90086 | 1.94092 | 1.95618 | 2.0423  | 2.56875 |
| chr17, mir-22   | 2.08613 | 2.11893 | 1.8788  | 2.19653 | 2.07733 | 2.0184  | 1.75853 | 2.04733 |
| chr17, mir-132, | 2.09762 | 2.04841 | 1.96    | 2.15952 | 2.0781  | 2.03048 | 1.8619  | 2.06571 |
| chr17, mir-195, | 2.07854 | 2.06786 | 1.96913 | 2.12058 | 2.07864 | 2.01942 | 1.79408 | 1.97825 |
| chr17, mir-324  | 2.08152 | 2.13393 | 1.95018 | 2.1808  | 2.08973 | 2.00634 | 1.77188 | 2.03929 |
| chr17, mir-33b  | 2.09736 | 2.10778 | 2.05014 | 2.16653 | 2.10861 | 2.02931 | 2.00056 | 1.98292 |
| chr17, mir-451, | 2.00593 | 2.01037 | 1.85    | 2.02982 | 1.98574 | 1.95907 | 1.67204 | 1.90444 |
| chr17, mir-423  | 1.96074 | 1.86821 | 1.81768 | 1.91558 | 1.96116 | 1.96084 | 1.57179 | 1.72116 |
| chr17, mir-193a | 2.02992 | 2.05766 | 1.87887 | 2.03048 | 2.0121  | 1.96073 | 1.72016 | 1.85419 |
| chr17, mir-632  | 1.97372 | 1.91053 | 1.85425 | 1.94088 | 1.94814 | 1.98097 | 1.59531 | 1.73443 |
| chr17, mir-152  | 1.98861 | 2.05695 | 1.85009 | 2.07231 | 1.9937  | 1.93472 | 3.75611 | 1.90481 |
| chr17, mir-10a  | 2.02924 | 2.06136 | 1.8389  | 2.05034 | 1.99271 | 1.9111  | 4.35297 | 1.92415 |
| chr17, mir-196a | 2.04049 | 2.05853 | 1.83794 | 2.04657 | 2.01147 | 1.94843 | 3.83784 | 1.89598 |
| chr17, mir-142  | 2.06012 | 2.07963 | 1.89768 | 2.1578  | 1.99488 | 1.97183 | 2.42671 | 1.81646 |
| chr17, mir-454, | 1.9917  | 1.91682 | 1.86178 | 1.91578 | 1.97852 | 1.95963 | 2.67022 | 1.68585 |
| chr17, mir-21   | 1.98156 | 1.92376 | 1.76881 | 1.97844 | 1.92174 | 1.95018 | 2.38459 | 1.6044  |
| chr17, mir-633  | 2.01051 | 1.94346 | 1.86782 | 1.89115 | 1.96885 | 1.98167 | 1.66487 | 1.74026 |
| chr17, mir-634  | 2.00546 | 1.94924 | 1.88109 | 1.96185 | 2.0095  | 1.98134 | 1.76614 | 1.81302 |
| chr17, mir-548c | 1.99191 | 1.97067 | 1.85472 | 1.99652 | 1.95955 | 1.94539 | 1.6618  | 1.76202 |
| chr17, mir-635  | 1.99575 | 1.97345 | 1.84713 | 2.02103 | 1.98103 | 1.9269  | 1.63793 | 1.9046  |
| chr17, mir-636  | 1.96832 | 1.88929 | 1.85743 | 1.95593 | 1.93867 | 1.97911 | 1.70416 | 1.72071 |
| chr17, mir-657, | 2.09512 | 1.99902 | 1.96829 | 2.05659 | 2.04659 | 1.95854 | 2.0161  | 1.97195 |
| chr18, mir-133a | 1.95431 | 2.04403 | 1.86208 | 2.20604 | 1.90812 | 9.48743 | 1.55653 | 2.40896 |
| chr18, mir-187  | 2.31928 | 2.19275 | 1.86667 | 2.28565 | 1.99217 | 9.27072 | 1.19087 | 2.45812 |
| chr18, mir-122a | 2.2652  | 2.2886  | 1.8282  | 2.3599  | 2.0939  | 10.1977 | 1.1871  | 2.6661  |
| chr19, mir-637  | 2.05282 | 2.06538 | 1.96205 | 2.04641 | 2.04513 | 1.95641 | 1.87846 | 1.94795 |
| chr19, mir-7-3  | 2.0204  | 2.05    | 1.8488  | 2.0892  | 2.017   | 1.9548  | 1.6542  | 1.9284  |
| chr19, mir-638  | 1.99889 | 2.00444 | 1.83689 | 2.036   | 2.018   | 1.96067 | 2.11244 | 1.96133 |
| chr19, mir-199a | 2.03314 | 2.0202  | 1.87627 | 1.92961 | 2.01118 | 1.96196 | 2.07412 | 1.98137 |
| chr19, mir-24-2 | 2.02769 | 1.98327 | 1.92    | 2.08327 | 2.03635 | 1.93423 | 2.21692 | 2.00019 |
| chr19, mir-181c | 2.04891 | 2.08582 | 1.91218 | 2.18418 | 2.04418 | 1.94345 | 2.088   | 2.02855 |
| chr19, mir-639  | 2.03773 | 2.016   | 1.87987 | 2.09013 | 2.0136  | 1.97667 | 2.16853 | 1.90867 |
| chr19, mir-640  | 2.02096 | 2.02952 | 1.87567 | 1.70875 | 2.02519 | 1.96942 | 2.09154 | 1.87337 |
| chr19, mir-641  | 2.04855 | 2.02473 | 1.892   | 2.06982 | 2.05073 | 1.96018 | 3.19764 | 1.92091 |
| chr19, mir-330  | 2.00714 | 2.09184 | 1.87367 | 2.10245 | 2.04531 | 1.96837 | 3.89918 | 1.99347 |
| chr19, mir-642  | 2.02113 | 2.05358 | 1.89434 | 2.11    | 1.9866  | 1.96962 | 4.16264 | 1.95887 |

|                   |         |          |         |          |         |         |         |          |
|-------------------|---------|----------|---------|----------|---------|---------|---------|----------|
| chr19, mir-769    | 2.05439 | 2.1286   | 1.89263 | 2.13333  | 2.00421 | 1.93228 | 4.25912 | 1.96895  |
| chr19, mir-150    | 2.02254 | 2.49111  | 1.87667 | 2.45175  | 1.98937 | 1.9527  | 2.0154  | 1.8981   |
| chr19, mir-99b,   | 2.05686 | 2.314    | 1.90371 | 2.41086  | 2.06172 | 1.97729 | 1.693   | 1.89214  |
| chr19, mir-643    | 2.11228 | 2.35734  | 1.9395  | 2.28899  | 2.01646 | 1.98013 | 1.83114 | 1.65772  |
| chr19, mir-512-   | 2.02304 | 2.32139  | 1.87211 | 2.33381  | 2.05521 | 1.98748 | 1.71175 | 1.78217  |
| chr20, mir-103-   | 1.95556 | 1.89846  | 1.81658 | 1.91188  | 1.91692 | 1.93145 | 1.54983 | 2.45068  |
| chr20, mir-663    | 2.02385 | 2.955    | 1.94423 | 2.28     | 1.96077 | 1.92115 | 1.84577 | 2.00077  |
| chr20, mir-644    | 1.90454 | 1.83009  | 1.78898 | 1.84981  | 1.8813  | 1.91444 | 1.95361 | 2.50435  |
| chr20, mir-499    | 2.02667 | 1.97987  | 1.91747 | 2.0836   | 1.99333 | 1.89933 | 2.09827 | 2.49067  |
| chr20, mir-645    | 1.96486 | 1.9328   | 1.8586  | 1.99785  | 1.95991 | 1.92748 | 2.52897 | 2.41168  |
| chr20, mir-296    | 2.01484 | 2.01926  | 1.85305 | 2.02968  | 2.03747 | 1.90695 | 2.06421 | 2.63621  |
| chr20, mir-646    | 2.07265 | 1.9499   | 1.89918 | 1.92643  | 2.07153 | 1.97602 | 2.08184 | 2.33469  |
| chr20, mir-1-1,   | 2.02156 | 1.98047  | 1.96266 | 2.05813  | 2.02281 | 1.90094 | 2.23625 | 2.51719  |
| chr20, mir-124a   | 2.02554 | 1.98929  | 1.94089 | 2.08411  | 2.04107 | 1.9425  | 2.11607 | 2.45732  |
| chr20, mir-647    | 2.00231 | 1.94385  | 1.89981 | 2.03788  | 1.99692 | 1.97577 | 2.1925  | 2.48538  |
| chr21, mir-99a,   | 2.11519 | 1.96078  | 1.8862  | 1.90705  | 2.04077 | 2.00093 | 2.05767 | 1.66992  |
| chr21, mir-125b   | 2.05611 | 1.85778  | 1.92129 | 1.83     | 2.01506 | 2.01019 | 2.09136 | 1.60278  |
| chr21, mir-155    | 2.00117 | 1.9271   | 1.84738 | 1.95076  | 1.94931 | 1.98759 | 1.99552 | 1.64241  |
| chr21, mir-802    | 2.00137 | 2.00936  | 1.84702 | 1.92524  | 1.97774 | 1.94685 | 1.99944 | 1.83202  |
| chr22, mir-648    | 2.02405 | 2.0596   | 1.89068 | 2.08149  | 2.03568 | 1.96946 | 1.71932 | 1.95703  |
| chr22, mir-185    | 2.02271 | 1.999    | 1.93386 | 2.08328  | 2.046   | 1.94957 | 1.88186 | 1.958    |
| chr22, DGCR8-     | 2.02848 | 1.98875  | 1.94705 | 2.07571  | 2.00625 | 1.94125 | 1.8225  | 1.94964  |
| chr22, mir-649    | 2.05915 | 2.06872  | 1.94191 | 2.10234  | 2.04553 | 1.95085 | 1.87425 | 1.95362  |
| chr22, mir-130b   | 2.02561 | 2.02684  | 1.93474 | 2.09     | 2.04351 | 1.99509 | 1.8193  | 1.91982  |
| chr22, mir-650    | 2.23115 | 1.67615  | 2.11    | 1.44346  | 1.89346 | 1.35397 | 1.89654 | 2.18628  |
| chr22, PIWIL3     | 1.98829 | 1.9555   | 1.86227 | 1.95678  | 1.96559 | 1.95398 | 1.67872 | 1.87171  |
| chr22, mir-658,   | 2.01494 | 2.03937  | 1.86747 | 2.10013  | 2.02506 | 1.95139 | 1.68709 | 1.95975  |
| chr22, mir-33     | 2.05472 | 2.03306  | 1.93514 | 2.08444  | 2.03306 | 1.99444 | 1.75569 | 1.85417  |
| chr22, let-7a-3,  | 2.10039 | 2.24627  | 2.00412 | 2.18941  | 2.0702  | 1.95294 | 2.05412 | 2.11882  |
| chrX, mir-651     | 1.61296 | 0.98984  | 1.15336 | 0.9496   | 1.05272 | 1.07272 | 2.06    | 0.856721 |
| chrX, mir-221,    | 1.56792 | 1.23255  | 1.13811 | 0.959717 | 1.01509 | 1.06066 | 1.10207 | 1.36038  |
| chrX, mir-532,    | 1.63044 | 1.1707   | 1.12044 | 0.950263 | 1.015   | 1.12263 | 1.97535 | 1.43184  |
| chrX, mir-98, let | 1.61647 | 1.44813  | 1.09245 | 0.991582 | 1.02424 | 1.09727 | 1.83173 | 1.45921  |
| chrX, mir-223     | 1.63086 | 0.975    | 1.13117 | 1.0018   | 1.02508 | 1.08586 | 1.91945 | 1.46039  |
| chrX, mir-421     | 1.62051 | 0.966735 | 1.16245 | 0.965816 | 1.03286 | 1.10551 | 1.83367 | 1.50388  |
| chrX, mir-545,    | 1.60569 | 0.952439 | 1.15577 | 0.959838 | 1.03374 | 1.07187 | 1.9052  | 1.53089  |
| chrX, mir-384     | 1.59054 | 0.955357 | 1.17875 | 0.925357 | 1.02786 | 1.06821 | 1.99214 | 1.45982  |

|                 |         |          |         |          |          |         |         |          |
|-----------------|---------|----------|---------|----------|----------|---------|---------|----------|
| chrX, mir-325   | 1.59432 | 0.941136 | 1.17977 | 0.956591 | 1.00591  | 1.06977 | 1.98545 | 1.48523  |
| chrX, mir-361   | 1.64247 | 0.927312 | 1.17742 | 0.921935 | 1.0472   | 1.10699 | 1.93107 | 1.35194  |
| chrX, mir-652   | 1.58944 | 1.21785  | 1.14935 | 0.955794 | 1.01346  | 1.07065 | 1.98449 | 0.852523 |
| chrX, mir-448   | 1.626   | 1.18775  | 1.18638 | 0.893125 | 1.04037  | 1.06825 | 2.1075  | 0.76325  |
| chrX, mir-766   | 1.59783 | 1.2337   | 1.06826 | 1.01293  | 1.0063   | 1.11587 | 1.96717 | 0.891956 |
| chrX, mir-220   | 1.57756 | 1.1939   | 1.14293 | 0.94561  | 1.01512  | 1.11024 | 1.99    | 0.873171 |
| chrX, mir-363,  | 1.53215 | 1.15462  | 1.14162 | 0.929615 | 0.989    | 1.02146 | 2.08469 | 1.44785  |
| chrX, mir-450-1 | 1.58947 | 1.18629  | 1.12174 | 0.980152 | 1.00727  | 1.05129 | 2.03447 | 1.47568  |
| chrX, mir-504   | 1.57654 | 1.18569  | 1.18992 | 0.908385 | 1.01846  | 1.06138 | 2.06285 | 1.37462  |
| chrX, mir-505   | 1.58758 | 1.17769  | 1.17429 | 0.941758 | 1.01429  | 1.05253 | 2.00802 | 1.34297  |
| chrX, mir-513-1 | 1.64299 | 1.19412  | 1.15299 | 0.917835 | 1.02881  | 1.05376 | 2.05531 | 1.44072  |
| chrX, FMR1      | 1.5723  | 1.1334   | 1.14323 | 0.897624 | 0.993616 | 1.05872 | 1.95369 | 1.43699  |
| chrX, mir-224,  | 1.66535 | 1.24543  | 1.13558 | 0.965659 | 1.06372  | 1.09295 | 2.03116 | 1.44186  |
| chrX, mir-105-1 | 1.61833 | 1.25133  | 1.15622 | 0.933222 | 1.04489  | 1.05011 | 1.99311 | 1.55189  |

| TUMOR ID        | HT      | Karpas-11(Karpas-42 | Ly1     | Ly18    | Ly19    | Ly3     | Ly4     |         |
|-----------------|---------|---------------------|---------|---------|---------|---------|---------|---------|
| MiRNA ID        |         |                     |         |         |         |         |         |         |
| chr1, mir-200b, | 1.96605 | 2.01465             | 2.07442 | 1.94    | 1.91209 | 1.65186 | 1.84442 | 2.02791 |
| chr1, mir-551a  | 1.90839 | 1.97839             | 2.13194 | 1.93968 | 1.92936 | 1.67936 | 1.78742 | 1.96613 |
| chr1, mir-34a   | 2.18453 | 2.0376              | 1.84973 | 2.07107 | 2.00533 | 1.2764  | 1.80707 | 2.1652  |
| chr1, mir-801   | 2.20381 | 2.10476             | 1.91905 | 2.1119  | 2.02405 | 2.17667 | 2.04048 | 2.23929 |
| chr1, mir-552   | 2.14286 | 1.94013             | 1.79    | 1.97909 | 1.91753 | 1.92442 | 1.79987 | 2.11584 |
| chr1, AGO4, A   | 2.29166 | 2.05444             | 1.99835 | 2.12452 | 2.00528 | 2.19001 | 1.94793 | 2.33416 |
| chr1, mir-30e,  | 2.20015 | 2.03441             | 1.92154 | 2.05573 | 1.9861  | 2.07441 | 1.91551 | 2.25993 |
| chr1, mir-101-1 | 2.11071 | 1.95429             | 1.79262 | 1.95833 | 2.05071 | 2.15968 | 1.9873  | 2.27571 |
| chr1, SERBP1    | 2.16989 | 1.93783             | 1.88821 | 2.07902 | 2.01049 | 2.2175  | 1.85957 | 2.33538 |
| chr1, mir-186   | 2.15329 | 1.70584             | 1.90268 | 1.93691 | 1.89215 | 1.96671 | 1.86047 | 2.34221 |
| chr1, mir-137   | 2.09222 | 1.93784             | 2.01506 | 1.92187 | 1.95619 | 2.12063 | 1.76926 | 2.22813 |
| chr1, mir-553   | 2.24464 | 1.9592              | 2.01464 | 2.022   | 1.9688  | 2.15376 | 1.92344 | 2.31064 |
| chr1, mir-197   | 2.33674 | 2.04872             | 1.94617 | 2.06539 | 2.0161  | 2.19277 | 1.90305 | 2.31851 |
| chr1, DDX20     | 2.18011 | 2.02751             | 1.86957 | 2.03875 | 1.92984 | 1.99405 | 1.91519 | 2.25162 |
| chr1, mir-554   | 2.155   | 1.98393             | 1.81464 | 1.96881 | 1.88274 | 2.66833 | 1.94417 | 1.99321 |
| chr1, mir-92b   | 1.97731 | 1.94204             | 1.86759 | 1.92454 | 1.90472 | 2.44639 | 1.96343 | 1.88917 |
| chr1, mir-555   | 2.18571 | 1.87679             | 1.90411 | 2.02446 | 1.93027 | 3.04375 | 2.08866 | 2.11143 |
| chr1, mir-9-1   | 2.08118 | 1.98205             | 1.80252 | 1.96591 | 1.87362 | 2.72063 | 1.98803 | 1.98992 |
| chr1, mir-765   | 1.98514 | 1.94856             | 1.77703 | 1.91252 | 1.83442 | 2.5345  | 1.91775 | 1.94505 |
| chr1, mir-556   | 2.03701 | 1.90387             | 3.28832 | 1.91854 | 1.81321 | 2.5862  | 1.95599 | 1.93686 |

|                  |         |         |         |         |         |         |         |         |
|------------------|---------|---------|---------|---------|---------|---------|---------|---------|
| chr1, mir-557    | 2.07606 | 1.93921 | 1.79039 | 1.93173 | 1.8078  | 2.73567 | 2.00654 | 2.03205 |
| chr1, mir-214,   | 2.09472 | 1.96426 | 1.74179 | 1.87395 | 1.78246 | 2.81508 | 2.19272 | 2.03564 |
| chr1, mir-488    | 1.93078 | 1.85142 | 1.69823 | 1.79348 | 1.80936 | 2.59908 | 1.87936 | 1.94404 |
| chr1, mir-181b-  | 2.23601 | 2.00318 | 1.87176 | 2.02568 | 1.92574 | 3.1377  | 2.85709 | 2.1323  |
| chr1, mir-135b   | 1.98184 | 1.95878 | 1.69092 | 1.89755 | 1.89816 | 2.5048  | 2.45337 | 1.94673 |
| chr1, mir-29c,   | 2.05462 | 1.97531 | 1.78563 | 1.87175 | 1.8665  | 2.65075 | 2.72394 | 2.04031 |
| chr1, mir-205    | 1.96881 | 1.91504 | 1.70495 | 1.79734 | 1.81817 | 2.44578 | 2.53183 | 1.95018 |
| chr1, mir-215,   | 2.21631 | 2.07189 | 1.95894 | 1.89844 | 1.89459 | 2.85853 | 2.86541 | 2.14262 |
| chr2, mir-558    | 3.26446 | 2.92373 | 1.94364 | 2.07127 | 2.06555 | 2.13109 | 2.02109 | 1.40082 |
| chr2, mir-559    | 1.21426 | 1.98777 | 1.91447 | 2.04798 | 2.09468 | 2.12691 | 1.92415 | 1.36202 |
| chr2, mir-217,   | 1.11425 | 2.87858 | 1.77896 | 2.00567 | 1.99806 | 1.94209 | 1.85582 | 1.26657 |
| chr2, mir-560    | 1.86889 | 1.62333 | 1.94111 | 1.67444 | 2.15111 | 1.78667 | 1.91556 | 1.70667 |
| chr2, mir-128a   | 1.19481 | 2.10504 | 2.01083 | 2.12797 | 1.8597  | 2.19632 | 2.11399 | 1.88556 |
| chr2, mir-10b    | 2.09504 | 1.98933 | 1.88034 | 1.88042 | 1.88731 | 1.89588 | 1.85529 | 1.76824 |
| chr2, mir-561    | 2.11173 | 2.01576 | 1.87014 | 1.97791 | 1.88691 | 1.90748 | 1.98036 | 1.84381 |
| chr2, mir-26b    | 2.00881 | 1.99864 | 1.95102 | 1.93915 | 1.91339 | 1.98763 | 1.97712 | 1.82678 |
| chr2, mir-375    | 2.03634 | 1.98344 | 1.84108 | 1.95495 | 1.90129 | 1.93065 | 1.87828 | 1.77806 |
| chr2, mir-153-1  | 2.05026 | 1.96359 | 1.87846 | 1.95167 | 1.93551 | 1.95102 | 1.9141  | 1.83269 |
| chr2, mir-562    | 2.1855  | 2.08267 | 1.86167 | 2.04633 | 1.95517 | 2.10883 | 1.956   | 1.87717 |
| chr2, mir-149    | 2.025   | 2.026   | 1.98375 | 1.96275 | 1.899   | 1.98225 | 1.88775 | 1.82475 |
| chr3, mir-563    | 2.12    | 2.08444 | 1.82555 | 2.00206 | 1.91    | 2.0619  | 2.71984 | 1.61048 |
| chr3, mir-128b   | 2.02957 | 1.99719 | 1.78079 | 2.05329 | 1.93335 | 2.12299 | 1.86415 | 1.68847 |
| chr3, mir-26a-1  | 2.16    | 1.95944 | 1.8846  | 1.97274 | 1.93452 | 2.03952 | 2.60395 | 1.63895 |
| chr3, mir-138-1  | 2.085   | 1.87683 | 1.80127 | 1.85309 | 1.90849 | 1.91262 | 2.52222 | 1.65159 |
| chr3, mir-564    | 2.12576 | 1.90674 | 1.85098 | 1.95174 | 1.95533 | 1.99337 | 2.58793 | 1.67326 |
| chr3, mir-565    | 2.21726 | 1.93605 | 1.94129 | 2.04879 | 1.99637 | 2.13411 | 2.77427 | 1.6675  |
| chr3, mir-425,   | 2.0703  | 1.98667 | 1.88343 | 2.00838 | 1.95949 | 2.03414 | 2.03788 | 1.66576 |
| chr3, mir-566    | 2.06153 | 2.04237 | 2.03475 | 2.05441 | 1.98797 | 2.13898 | 1.93339 | 1.72678 |
| chr3, let-7g, mi | 2.13122 | 1.99133 | 1.93657 | 2.02983 | 2.00287 | 2.11762 | 2.03785 | 1.68751 |
| chr3, mir-567    | 2.07963 | 1.99869 | 1.86328 | 1.93095 | 1.9246  | 1.94635 | 2.07934 | 1.31511 |
| chr3, mir-568    | 2.20166 | 2.00599 | 1.79968 | 2.01994 | 1.89064 | 1.98554 | 2.05796 | 1.2672  |
| chr3, mir-198    | 2.10808 | 2.02112 | 1.858   | 1.91968 | 1.92856 | 1.98728 | 1.97336 | 1.33856 |
| chr3, mir-15b,   | 2.22812 | 1.95247 | 1.87201 | 2.76299 | 1.95987 | 2.09994 | 2.0963  | 2.25916 |
| chr3, mir-551b   | 2.09447 | 1.96825 | 1.79243 | 2.83039 | 1.82893 | 1.91049 | 1.9668  | 2.23388 |
| chr3, mir-569    | 2.02733 | 1.97193 | 1.7497  | 2.75259 | 1.82015 | 1.90667 | 1.88333 | 2.15318 |
| chr3, mir-28     | 2.10201 | 2.08201 | 2.69438 | 2.9584  | 1.89822 | 1.93036 | 2.18248 | 2.27633 |
| chr3, mir-570    | 2.42737 | 2.07079 | 2.34368 | 2.26447 | 2.18237 | 2.11737 | 1.34895 | 1.73763 |

|                 |         |         |         |         |         |         |         |         |
|-----------------|---------|---------|---------|---------|---------|---------|---------|---------|
| chr4, mir-571   | 1.21118 | 2.08471 | 2.20765 | 1.20176 | 1.96235 | 2.09529 | 2.05882 | 2.13824 |
| chr4, mir-95    | 1.19286 | 1.93071 | 1.79229 | 1.23657 | 1.90029 | 2.06457 | 1.89386 | 2.00571 |
| chr4, mir-572   | 1.09962 | 1.99646 | 1.77316 | 1.0338  | 1.94013 | 1.93684 | 2.01329 | 2.0524  |
| chr4, mir-218-1 | 1.15135 | 2.00923 | 1.91432 | 1.014   | 1.95123 | 1.92381 | 1.92123 | 2.11361 |
| chr4, mir-573   | 1.16843 | 2.00638 | 1.91315 | 1.06717 | 1.9715  | 1.98433 | 1.96559 | 2.16905 |
| chr4, mir-574   | 1.21808 | 2.03657 | 1.94717 | 2.10162 | 1.99909 | 2.06929 | 2.04848 | 2.15061 |
| chr4, mir-575   | 2.12389 | 1.92058 | 1.14515 | 1.98505 | 1.93379 | 2.0135  | 1.97845 | 1.98913 |
| chr4, mir-576   | 2.28198 | 1.975   | 1.97664 | 2.03741 | 1.95974 | 2.08293 | 2.00655 | 2.13966 |
| chr4, mir-367,  | 2.2575  | 2.02159 | 1.95568 | 1.9375  | 1.95985 | 2.15735 | 2.12288 | 2.09727 |
| chr4, mir-577   | 2.17343 | 1.99229 | 1.87572 | 1.93476 | 1.91717 | 2.08018 | 1.75012 | 1.98632 |
| chr4, mir-578   | 2.30071 | 1.98659 | 2.76984 | 1.99309 | 1.95024 | 2.05651 | 2.22706 | 2.12667 |
| chr5, Droscha   | 2.03778 | 1.88815 | 1.77915 | 1.93534 | 1.52703 | 1.85536 | 1.86034 | 2.39503 |
| chr5, mir-579   | 2.20565 | 1.86197 | 1.96823 | 2.03    | 1.90429 | 1.99735 | 2.05605 | 2.48075 |
| chr5, mir-580   | 2.0896  | 1.89144 | 1.81296 | 1.9464  | 1.91096 | 2.148   | 1.92464 | 2.32704 |
| chr5, mir-581   | 2.04739 | 1.89619 | 1.79918 | 2.02366 | 1.91007 | 1.10284 | 2.01172 | 1.9541  |
| chr5, mir-449,  | 2.15275 | 1.96464 | 1.84986 | 1.88362 | 1.93022 | 2.06652 | 2.03862 | 1.87138 |
| chr5, mir-582   | 2.0135  | 2.05042 | 1.79375 | 1.90608 | 1.84933 | 1.91167 | 1.79417 | 1.93108 |
| chr5, mir-9-2   | 2.15162 | 1.86975 | 1.876   | 1.89131 | 1.85856 | 1.99744 | 2.0265  | 1.60331 |
| chr5, mir-583   | 2.05737 | 1.9812  | 1.73707 | 1.92451 | 1.80248 | 1.98504 | 2.03451 | 1.59406 |
| chr5, mir-584   | 2.10422 | 1.94651 | 1.79205 | 1.87325 | 1.84434 | 1.84096 | 1.79482 | 1.61301 |
| chr5, mir-143,  | 2.05307 | 1.89683 | 1.83277 | 1.88159 | 1.87515 | 1.85614 | 1.78535 | 1.60762 |
| chr5, mir-378   | 2.05084 | 1.94843 | 1.89783 | 1.90566 | 1.91976 | 1.9588  | 1.88603 | 1.6659  |
| chr5, mir-146a  | 2.07404 | 1.93798 | 1.76414 | 1.90051 | 1.94657 | 2.0899  | 1.9603  | 1.64879 |
| chr5, mir-103-1 | 2.18833 | 1.90356 | 1.83546 | 1.87212 | 1.93    | 1.91371 | 2.09939 | 1.6722  |
| chr5, mir-218-2 | 2.04299 | 1.89785 | 1.78093 | 1.87664 | 1.86168 | 1.83411 | 1.93439 | 1.65262 |
| chr5, mir-585   | 2.04664 | 1.905   | 1.781   | 1.86927 | 1.79991 | 1.85327 | 1.90264 | 1.63318 |
| chr5, mir-340   | 2.1843  | 1.95118 | 1.86301 | 1.98484 | 1.8671  | 2.01828 | 2.09161 | 1.6157  |
| chr6, mir-548a- | 2.13406 | 1.94236 | 1.89382 | 1.98626 | 1.9813  | 2.76992 | 1.85187 | 1.91553 |
| chr6, mir-219-1 | 2.00093 | 1.94175 | 1.7932  | 1.8933  | 1.92588 | 2.5832  | 1.28598 | 1.79959 |
| chr6, XPO5      | 2.12644 | 1.99657 | 1.88885 | 2.00215 | 1.94295 | 2.92013 | 2.0976  | 1.89359 |
| chr6, mir-586   | 2.1056  | 2.02319 | 1.83819 | 1.93922 | 1.85716 | 2.89604 | 2.09776 | 1.95121 |
| chr6, mir-206,  | 2.05029 | 1.99475 | 1.71604 | 1.97245 | 1.84986 | 2.82209 | 2.08525 | 1.87331 |
| chr6, mir-30c-2 | 2.10318 | 1.98693 | 1.89413 | 1.92617 | 1.94368 | 2.10886 | 2.08049 | 2.01784 |
| chr6, mir-587   | 2.179   | 2.04718 | 1.97718 | 2.13564 | 2.02882 | 2.11027 | 1.26327 | 2.236   |
| chr6, mir-548b  | 2.25752 | 1.98814 | 1.91965 | 1.99619 | 1.96159 | 2.00779 | 1.2323  | 2.36257 |
| chr6, mir-588   | 2.30115 | 2.06213 | 1.99934 | 2.11164 | 1.97787 | 2.18623 | 1.15443 | 2.39803 |
| chr6, mir-548a- | 2.21732 | 2.0289  | 1.97425 | 2.10276 | 2.13819 | 2.36559 | 1.21976 | 2.39157 |

|                  |         |         |         |         |         |         |         |         |
|------------------|---------|---------|---------|---------|---------|---------|---------|---------|
| chr7, mir-339    | 1.85263 | 1.81684 | 1.91342 | 1.84553 | 2.17342 | 2.30816 | 1.355   | 1.77921 |
| chr7, mir-589    | 1.81549 | 1.82471 | 1.87039 | 1.86667 | 2.24784 | 2.50726 | 1.19059 | 1.75078 |
| chr7, mir-148a   | 2.03406 | 1.83344 | 1.76979 | 2.77344 | 2.40542 | 2.75906 | 1.84385 | 1.6351  |
| chr7, mir-196b   | 1.95719 | 1.83896 | 1.78625 | 2.61365 | 2.37698 | 2.67635 | 1.72844 | 1.68021 |
| chr7, mir-550-1  | 2.14901 | 1.92012 | 1.96482 | 2.87691 | 2.47358 | 2.8558  | 1.91889 | 1.75161 |
| chr7, has-mir-5  | 2.17000 | 1.92000 | 1.84000 | 2.65000 | 2.36000 | 2.86000 | 1.89000 | 1.71000 |
| chr7, mir-590    | 2.04011 | 1.96355 | 1.94495 | 2.69473 | 2.36989 | 2.02849 | 2.50193 | 3.32914 |
| chr7, mir-653, l | 2.00775 | 1.84325 | 1.76187 | 2.68106 | 2.25419 | 1.82831 | 2.56631 | 2.90456 |
| chr7, mir-591    | 1.99808 | 1.79752 | 1.84528 | 2.69408 | 2.28328 | 1.8596  | 2.45592 | 2.88344 |
| chr7, mir-25, m  | 1.92566 | 1.82496 | 1.74381 | 2.48274 | 2.24186 | 1.83186 | 2.38168 | 2.44655 |
| chr7, mir-592    | 1.985   | 1.89608 | 1.78415 | 3.51923 | 2.25292 | 1.77169 | 2.41238 | 2.85785 |
| chr7, SDN1, m    | 2.07405 | 1.96192 | 1.90413 | 3.62803 | 2.30289 | 1.91238 | 2.48783 | 2.84235 |
| chr7, mir-129-1  | 1.99652 | 1.91191 | 1.86506 | 3.36258 | 2.30326 | 1.91652 | 2.36562 | 2.68876 |
| chr7, mir-182, l | 1.93465 | 1.89606 | 1.89616 | 3.1298  | 2.26212 | 1.90121 | 2.28717 | 2.79808 |
| chr7, mir-335    | 2.08578 | 1.93711 | 1.88273 | 3.63961 | 2.31648 | 1.94109 | 2.44359 | 2.84164 |
| chr7, mir-29a, l | 2.07358 | 1.91905 | 1.88526 | 3.73726 | 2.39053 | 1.98758 | 2.52421 | 2.894   |
| chr7, mir-490    | 1.97272 | 1.90337 | 1.84047 | 2.60006 | 2.27047 | 1.7784  | 2.48917 | 2.81391 |
| chr7, has-mir-5  | 2.04774 | 1.89643 | 1.89893 | 2.62631 | 2.43726 | 2.02893 | 2.66179 | 2.80309 |
| chr7, mir-671    | 1.95711 | 1.84548 | 1.85327 | 2.35038 | 2.18567 | 1.90106 | 2.29317 | 2.49788 |
| chr7, mir-153-2  | 2.00291 | 1.93407 | 1.85919 | 2.64919 | 2.16733 | 1.93488 | 2.33779 | 2.72116 |
| chr7, mir-595    | 1.95235 | 1.80519 | 1.92025 | 2.51605 | 2.15321 | 1.9342  | 2.30358 | 2.55481 |
| chr8, mir-596    | 2.11    | 1.99884 | 1.94014 | 1.23725 | 1.94638 | 1.97913 | 1.15768 | 1.61797 |
| chr8, mir-597    | 2.31924 | 2.15848 | 2.00828 | 1.10497 | 1.9729  | 2.07379 | 1.24848 | 1.51193 |
| chr8, mir-124a-  | 2.13946 | 2.00937 | 1.81491 | 1.12938 | 1.92768 | 1.91107 | 1.22429 | 1.44036 |
| chr8, mir-598    | 2.11563 | 1.96471 | 1.80988 | 1.16713 | 1.92759 | 1.89517 | 1.33494 | 1.52678 |
| chr8, mir-383    | 2.11436 | 1.98273 | 1.85545 | 1.02155 | 1.908   | 1.91273 | 1.21936 | 1.53564 |
| chr8, mir-320, l | 2.23236 | 2.0318  | 1.92041 | 1.18204 | 1.99459 | 2.14372 | 1.3059  | 1.54389 |
| chr8, mir-486    | 2.03765 | 1.91106 | 1.85576 | 1.96424 | 1.936   | 2.99565 | 1.36106 | 1.53506 |
| chr8, mir-124a-  | 2.06218 | 1.96256 | 1.80006 | 2.7859  | 1.8466  | 1.84026 | 1.82141 | 1.46769 |
| chr8, mir-599    | 2.12188 | 2.08987 | 2.01476 | 2.80933 | 1.82664 | 2.04181 | 2.00651 | 1.50825 |
| chr8, mir-548a-  | 2.05246 | 1.94213 | 1.86369 | 2.63729 | 1.91385 | 1.85615 | 1.88041 | 1.5009  |
| chr8, mir-548d-  | 2.19866 | 1.94493 | 2.01955 | 3.65157 | 1.96328 | 5.71686 | 1.9562  | 1.48313 |
| chr8, mir-30b, l | 2.14494 | 1.9175  | 1.78901 | 3.55474 | 2.74191 | 1.96217 | 2.09947 | 2.37776 |
| chr8, AGO2       | 2.07123 | 1.97151 | 1.825   | 3.51346 | 2.62719 | 2.04176 | 1.92059 | 2.29994 |
| chr8, mir-151    | 2.13842 | 2.04725 | 1.77333 | 3.773   | 2.70417 | 2.08417 | 1.93608 | 2.45058 |
| chr8, mir-661    | 1.85162 | 1.91513 | 1.90135 | 2.49135 | 2.24189 | 1.87811 | 1.81351 | 2.00054 |
| chr9, mir-101-2  | 2.20165 | 3.95364 | 1.93682 | 2.12013 | 2.6655  | 2.09914 | 2.90371 | 1.7151  |

|                   |         |         |         |         |         |          |         |         |
|-------------------|---------|---------|---------|---------|---------|----------|---------|---------|
| chr9, mir-491     | 2.24366 | 3.84217 | 1.96216 | 2.11836 | 2.76463 | 2.09694  | 2.86545 | 1.75784 |
| chr9, mir-31      | 2.30864 | 3.92636 | 1.88788 | 2.10042 | 2.81475 | 0.138051 | 2.84102 | 1.72729 |
| chr9, mir-204     | 2.03591 | 1.96518 | 1.7708  | 1.9254  | 2.48869 | 1.92095  | 2.01124 | 2.04204 |
| chr9, mir-7-1     | 2.23275 | 1.94383 | 1.95342 | 2.00492 | 2.63783 | 2.077    | 2.2035  | 2.08542 |
| chr9, let-7a-1, l | 2.16093 | 2.06959 | 1.89783 | 2.03309 | 2.66835 | 2.07546  | 2.24804 | 2.14423 |
| chr9, mir-23b, l  | 2.00257 | 2.00143 | 1.80962 | 2.02895 | 2.47552 | 1.962    | 2.01562 | 1.9579  |
| chr9, mir-32      | 2.15008 | 2.07789 | 1.86695 | 1.99758 | 2.55844 | 2.03727  | 2.07523 | 1.99516 |
| chr9, mir-455     | 1.93333 | 1.91762 | 1.82038 | 1.86667 | 2.30381 | 1.86086  | 1.92448 | 1.89733 |
| chr9, mir-147     | 2.05594 | 1.99604 | 1.7675  | 1.97854 | 2.38531 | 1.91083  | 1.96156 | 1.98365 |
| chr9, mir-600     | 2.09876 | 1.98898 | 1.87504 | 2.03956 | 2.58883 | 2.10022  | 2.03431 | 2.06161 |
| chr9, mir-601     | 2.04229 | 1.93552 | 1.87917 | 1.96813 | 2.45385 | 2.00823  | 1.92771 | 1.95083 |
| chr9, mir-181a-   | 2.165   | 2.05595 | 1.85543 | 2.03276 | 2.61578 | 2.09414  | 2.13586 | 2.08379 |
| chr9, mir-199b    | 2.03055 | 1.92945 | 1.86491 | 1.954   | 2.30327 | 1.96327  | 1.98182 | 1.86764 |
| chr9, mir-219-2   | 1.97724 | 1.97105 | 1.8525  | 1.92776 | 2.38    | 1.99592  | 1.93474 | 1.9079  |
| chr9, mir-126     | 1.81148 | 1.8937  | 1.99593 | 1.89407 | 2.1263  | 1.63519  | 1.79185 | 1.90889 |
| chr9, mir-602     | 2.02658 | 2.01737 | 2.03842 | 1.84737 | 2.22605 | 1.36237  | 2.045   | 1.99474 |
| chr10, mir-511-   | 1.88    | 1.965   | 1.64    | 1.45    | 1.75    | 1.915    | 1.695   | 1.55    |
| chr10, mir-603    | 1.99645 | 1.92975 | 1.76281 | 1.81488 | 1.77016 | 1.8719   | 1.82942 | 1.69397 |
| chr10, mir-604    | 2.09037 | 2.07037 | 1.8417  | 1.97615 | 1.81904 | 1.88667  | 1.80859 | 1.64681 |
| chr10, mir-605    | 2.02898 | 1.99708 | 1.77453 | 1.89219 | 1.72912 | 1.85467  | 1.73672 | 1.62161 |
| chr10, mir-606    | 2.16925 | 1.96677 | 1.80538 | 2.02462 | 1.71688 | 1.98473  | 1.78355 | 2.10269 |
| chr10, mir-346    | 2.0677  | 1.95433 | 1.15459 | 1.98662 | 1.84014 | 1.98838  | 1.74851 | 2.01405 |
| chr10, mir-107    | 2.13035 | 1.93675 | 1.0243  | 1.13096 | 1.76053 | 2.00825  | 1.88772 | 2.18842 |
| chr10, mir-607    | 2.23206 | 2.0232  | 1.06918 | 1.20144 | 1.84485 | 2.12866  | 1.90814 | 2.13155 |
| chr10, mir-608    | 2.13231 | 1.9705  | 1.93165 | 1.28174 | 1.8619  | 2.00769  | 1.86735 | 2.05033 |
| chr10, mir-146b   | 2.0729  | 1.98806 | 1.35758 | 1.42774 | 1.86677 | 2.02839  | 1.85726 | 1.97564 |
| chr10, mir-609    | 2.23195 | 1.98097 | 1.86345 | 2.04611 | 1.85832 | 2.01549  | 1.82575 | 2.08805 |
| chr10, mir-202    | 2.04049 | 1.95561 | 2.02805 | 1.94854 | 1.78073 | 2.06829  | 1.89634 | 1.94537 |
| chr11, mir-210    | 1.92795 | 1.99795 | 1.97864 | 1.98636 | 1.92636 | 2.06614  | 1.98091 | 1.90818 |
| chr11, mir-483    | 2.15061 | 1.965   | 1.87773 | 1.91151 | 1.91121 | 2.08152  | 1.86258 | 2.03288 |
| chr11, mir-610    | 2.12259 | 1.93705 | 1.93518 | 1.89396 | 1.88684 | 1.9395   | 2.00568 | 2.61561 |
| chr11, mir-129-   | 2.15399 | 1.9193  | 1.89888 | 1.91217 | 1.91203 | 2.00259  | 1.9172  | 2.50972 |
| chr11, mir-130a   | 2.12046 | 1.94782 | 1.90862 | 1.97023 | 1.90126 | 2.02345  | 1.99713 | 2.47011 |
| chr11, mir-611    | 2.08923 | 2.01171 | 1.88521 | 1.98564 | 1.95504 | 2.06043  | 1.97248 | 2.33402 |
| chr11, mir-192,   | 2.03965 | 1.98052 | 1.87466 | 1.97534 | 1.96586 | 2.04345  | 1.95828 | 2.23069 |
| chr11, mir-612    | 2.14688 | 2.03922 | 1.97922 | 2.03935 | 2.00377 | 2.14104  | 2.06922 | 2.50182 |
| chr11, MALAT1     | 2.29143 | 2.05469 | 1.98531 | 2.09867 | 2.0349  | 2.23408  | 2.20398 | 2.5501  |



|                  |         |         |          |         |         |         |         |          |
|------------------|---------|---------|----------|---------|---------|---------|---------|----------|
| chr11, mir-139   | 1.94759 | 1.9453  | 1.85458  | 1.94434 | 1.90494 | 1.9359  | 1.85217 | 2.21651  |
| chr11, mir-326   | 1.95319 | 1.94597 | 1.85195  | 1.88153 | 1.86486 | 1.89069 | 1.79958 | 2.25069  |
| chr11, PIWIL4    | 4.07071 | 1.92353 | 4.19583  | 1.88807 | 1.97224 | 1.93895 | 1.98434 | 2.04993  |
| chr11, mir-34b,  | 5.26308 | 1.99473 | 11.3473  | 4.66849 | 1.94404 | 2.13123 | 2.12836 | 3.11966  |
| chr11, mir-125b  | 1.15601 | 2.01262 | 0.964048 | 1.89    | 1.86839 | 1.98494 | 2.1097  | 3.03673  |
| chr11, let-7a-2, | 1.12044 | 1.99637 | 0.951264 | 1.84297 | 1.83516 | 1.98055 | 2.11846 | 3.01731  |
| chr12, mir-200c  | 2.06364 | 1.95692 | 1.90075  | 1.98037 | 1.83168 | 2.02579 | 2.52411 | 2.11598  |
| chr12, mir-613   | 2.06654 | 1.91012 | 1.83062  | 1.93198 | 1.79235 | 2.06827 | 2.67938 | 2.27346  |
| chr12, mir-614   | 2.01842 | 1.91026 | 1.79377  | 1.9093  | 1.7671  | 2.01202 | 2.53667 | 2.12842  |
| chr12, mir-196a  | 1.97467 | 2.58673 | 1.79533  | 1.89878 | 2.44944 | 1.91738 | 2.37589 | 1.87635  |
| chr12, mir-615   | 1.97844 | 2.60967 | 1.71574  | 1.84459 | 2.50943 | 1.87369 | 2.41336 | 1.69     |
| chr12, mir-148b  | 2.06814 | 2.67432 | 1.81797  | 1.93881 | 2.62    | 2.00246 | 2.52991 | 1.77661  |
| chr12, mir-616   | 2.06515 | 2.69616 | 1.84798  | 1.92535 | 2.56283 | 1.99192 | 2.53263 | 2.08818  |
| chr12, mir-26a-  | 1.99078 | 2.63287 | 1.81278  | 1.91513 | 2.53113 | 1.99165 | 2.38948 | 2.0907   |
| chr12, let-7i    | 2.14012 | 1.85234 | 1.83086  | 1.84981 | 2.79346 | 2.10241 | 2.70901 | 1.82957  |
| chr12, mir-548c  | 2.14575 | 1.84117 | 1.89333  | 1.88292 | 2.74583 | 2.05067 | 2.67083 | 1.80142  |
| chr12, mir-617   | 2.0138  | 1.88182 | 1.7735   | 1.78883 | 1.82715 | 1.86533 | 2.55752 | 1.79117  |
| chr12, mir-618   | 1.98345 | 1.84186 | 1.81041  | 1.76855 | 1.78662 | 1.86993 | 2.55028 | 1.79235  |
| chr12, mir-492   | 2.08721 | 1.89074 | 1.79323  | 1.83235 | 1.91603 | 1.96794 | 2.61529 | 2.16471  |
| chr12, mir-331   | 2.28572 | 1.94496 | 2.02389  | 1.88664 | 1.93618 | 2.05519 | 2.72428 | 2.38076  |
| chr12, mir-135a  | 1.9594  | 1.90293 | 1.7674   | 1.85687 | 1.78367 | 1.88193 | 2.42213 | 2.1692   |
| chr12, mir-619   | 2.05638 | 1.94388 | 1.79974  | 1.14552 | 1.92552 | 1.9556  | 2.55871 | 2.16741  |
| chr12, mir-620   | 2.08208 | 1.9853  | 1.76765  | 1.9547  | 1.90215 | 2.10671 | 2.69671 | 2.35987  |
| chr12, PIWIL1    | 1.9945  | 1.89979 | 1.7713   | 1.87336 | 1.78702 | 1.91349 | 2.39647 | 2.18798  |
| chr12, RAN       | 2.06321 | 1.8641  | 1.83987  | 1.87077 | 1.91231 | 2.11602 | 2.57628 | 2.16962  |
| chr13, mir-621   | 2.13274 | 2.80952 | 1.85226  | 1.99823 | 1.94952 | 2.66677 | 2.0279  | 1.82016  |
| chr13, mir-16-1  | 2.37149 | 3.15678 | 2.10033  | 2.15686 | 2.05215 | 2.32413 | 3.19182 | 1.90975  |
| chr13, mir-622   | 1.9855  | 2.87135 | 1.85685  | 2.6409  | 1.78072 | 2.39982 | 2.63126 | 7.53234  |
| chr13, mir-17,   | 2.10466 | 2.81692 | 1.73293  | 2.73752 | 1.81519 | 2.51308 | 2.8891  | 7.32384  |
| chr13, mir-623   | 2.16818 | 2.83374 | 1.90697  | 2.80161 | 1.99364 | 2.74525 | 2.83222 | 0.871717 |
| chr14, mir-208   | 2.09422 | 2.0244  | 2.50101  | 1.97817 | 1.89248 | 1.99541 | 1.88578 | 1.64633  |
| chr14, mir-624   | 2.29929 | 1.08905 | 2.87488  | 2.02238 | 1.96536 | 2.15143 | 2.0906  | 1.68655  |
| chr14, mir-625   | 2.31977 | 2.08058 | 2.81965  | 2.10563 | 1.98655 | 1.98058 | 2.17563 | 1.72575  |
| chr14, Dicer1    | 2.12838 | 2.044   | 2.78796  | 2.04906 | 1.96797 | 2.01995 | 1.98005 | 2.5475   |
| chr14, mir-342   | 2.08542 | 1.97417 | 2.53292  | 1.97031 | 1.92625 | 2.02479 | 1.89646 | 2.40615  |
| chr14, mir-345   | 1.9837  | 1.95019 | 2.46685  | 1.93852 | 1.95352 | 1.98722 | 1.8987  | 2.22593  |
| chr14, mir-770,  | 2.06923 | 2.01185 | 2.45084  | 1.94973 | 1.81537 | 1.90178 | 1.83658 | 2.35141  |

|                 |         |         |         |         |         |         |         |         |
|-----------------|---------|---------|---------|---------|---------|---------|---------|---------|
| chr14, mir-379, | 2.01061 | 2.02974 | 2.456   | 1.94252 | 1.79982 | 1.87909 | 1.78722 | 2.34504 |
| chr14, mir-203  | 1.92353 | 1.97882 | 2.39912 | 2.38912 | 1.85265 | 1.91    | 1.81    | 2.09265 |
| chr15, mir-211  | 2.0902  | 1.19724 | 1.90898 | 2.05204 | 2.00123 | 2.00939 | 1.96745 | 1.61041 |
| chr15, mir-626  | 2.41506 | 1.18953 | 2.08012 | 2.17529 | 2.0533  | 2.29929 | 2.10706 | 1.70953 |
| chr15, mir-627  | 2.31786 | 1.09653 | 1.96449 | 2.10592 | 2.00235 | 2.20878 | 2.06531 | 1.64357 |
| chr15, mir-628  | 2.29015 | 2.01932 | 2.05796 | 2.14629 | 1.93121 | 2.11818 | 2.02424 | 1.65583 |
| chr15, mir-190  | 2.06282 | 2.03504 | 1.79541 | 2.0177  | 1.86867 | 1.95185 | 1.90489 | 1.66726 |
| chr15, mir-422a | 2.08611 | 2.05078 | 1.93644 | 2.03767 | 1.988   | 1.98933 | 1.93622 | 1.62844 |
| chr15, mir-629  | 2.03784 | 1.89168 | 1.85216 | 2.05512 | 1.98088 | 1.7728  | 1.94776 | 1.6872  |
| chr15, mir-630  | 2.29583 | 2.05896 | 1.9713  | 2.072   | 1.97461 | 2.1133  | 2.01913 | 1.64626 |
| chr15, mir-631  | 2.02544 | 2.01165 | 1.9657  | 1.97152 | 1.96646 | 2.00354 | 1.90759 | 1.67076 |
| chr15, mir-184  | 2.09545 | 2.0167  | 1.83786 | 2.00116 | 1.89562 | 1.94045 | 1.9558  | 1.6175  |
| chr15, mir-549  | 2.12252 | 2.01396 | 1.79568 | 1.96856 | 1.96793 | 1.89396 | 2.02613 | 1.56937 |
| chr15, mir-7-2  | 2.16048 | 1.97357 | 1.89191 | 1.98655 | 1.97238 | 1.97476 | 2.07345 | 1.58798 |
| chr15, mir-9-3  | 2.16184 | 2.01092 | 1.90133 | 1.97306 | 1.96122 | 2.01429 | 1.93796 | 1.64469 |
| chr16, mir-662  | 1.85731 | 1.93654 | 1.97038 | 1.89962 | 1.90038 | 2.01615 | 1.90538 | 1.70346 |
| chr16, mir-193b | 2.12402 | 1.99869 | 1.88239 | 1.96033 | 1.99022 | 1.97489 | 1.97282 | 1.58457 |
| chr16, mir-484  | 2.16191 | 1.96783 | 1.91278 | 2.04991 | 1.96096 | 2.03209 | 2.07696 | 1.66739 |
| chr16, mir-138- | 2.08583 | 2.01722 | 1.9488  | 2.01444 | 1.95824 | 2.09204 | 1.98991 | 1.70398 |
| chr16, mir-328  | 1.99684 | 1.99398 | 1.94786 | 1.95398 | 1.92531 | 1.99327 | 1.88969 | 1.71918 |
| chr16, mir-140  | 2.08317 | 2.00305 | 1.91805 | 2.06512 | 1.91695 | 2.03902 | 1.91878 | 1.64098 |
| chr16, mir-768  | 2.20829 | 1.97566 | 1.94888 | 2.06052 | 1.96592 | 2.11586 | 2.0427  | 1.68816 |
| chr17, mir-22   | 2.07573 | 2.04387 | 1.97867 | 2.03373 | 1.5956  | 2.12587 | 1.94267 | 1.708   |
| chr17, mir-132, | 2.10873 | 2.0727  | 2.04603 | 2.04    | 1.49683 | 2.08556 | 1.88492 | 1.75444 |
| chr17, mir-195, | 2.16767 | 2.04845 | 1.95981 | 2.03068 | 1.47932 | 2.06835 | 1.92728 | 1.72058 |
| chr17, mir-324  | 2.20795 | 2.00911 | 1.9083  | 2.02777 | 1.50205 | 2.07687 | 1.94955 | 1.64777 |
| chr17, mir-33b  | 1.97278 | 2.01639 | 2.02111 | 1.98    | 1.6575  | 2.02264 | 1.82431 | 1.73847 |
| chr17, mir-451, | 2.11648 | 2.0287  | 2.01407 | 2.0037  | 2.61    | 2.09352 | 1.94426 | 1.66296 |
| chr17, mir-423  | 2.29011 | 2.06179 | 2.00505 | 2.13242 | 2.94158 | 2.19137 | 2.05095 | 1.67726 |
| chr17, mir-193a | 2.09484 | 2.01855 | 1.96194 | 1.97879 | 2.66218 | 2.00694 | 1.90605 | 1.67242 |
| chr17, mir-632  | 2.27283 | 2.08    | 2.03026 | 2.11336 | 2.92646 | 2.17106 | 2.10345 | 1.70124 |
| chr17, mir-152  | 2.09843 | 1.98074 | 1.98352 | 1.9475  | 2.69463 | 2.02491 | 2.08222 | 1.6387  |
| chr17, mir-10a  | 2.02    | 1.96534 | 1.8439  | 1.8861  | 2.59873 | 1.81517 | 1.95856 | 1.58924 |
| chr17, mir-196a | 2.07127 | 1.99824 | 1.86618 | 1.90784 | 2.6051  | 1.89431 | 1.9248  | 1.62323 |
| chr17, mir-142  | 2.05134 | 1.98476 | 1.90878 | 1.95073 | 2.52061 | 2.00268 | 1.97537 | 1.63598 |
| chr17, mir-454, | 2.18444 | 2.07407 | 1.99926 | 2.01037 | 2.85822 | 2.15445 | 2.10607 | 1.68007 |
| chr17, mir-21   | 2.21211 | 2.02936 | 2.01734 | 2.07064 | 2.90055 | 2.20073 | 2.23743 | 1.7022  |

|                 |         |         |         |         |         |         |         |         |
|-----------------|---------|---------|---------|---------|---------|---------|---------|---------|
| chr17, mir-633  | 2.16833 | 2.04654 | 1.95551 | 2.01026 | 2.79974 | 1.96769 | 1.91346 | 1.6059  |
| chr17, mir-634  | 2.13311 | 2.04235 | 1.99126 | 1.97706 | 2.7105  | 2.11571 | 1.8437  | 1.64966 |
| chr17, mir-548c | 2.17708 | 2.02966 | 1.95427 | 2.05135 | 2.75371 | 2.09551 | 2.00101 | 1.69011 |
| chr17, mir-635  | 2.17    | 2.00529 | 1.96437 | 2.06092 | 2.74333 | 2.09138 | 1.99207 | 1.63644 |
| chr17, mir-636  | 2.20159 | 2.06531 | 2.01699 | 2.08195 | 2.92035 | 2.13894 | 2.11133 | 2.10469 |
| chr17, mir-657, | 1.94244 | 1.96707 | 2.00195 | 1.91439 | 2.25707 | 1.99829 | 1.86537 | 1.95537 |
| chr18, mir-133a | 2.22215 | 1.9641  | 1.97896 | 2.01097 | 4.63083 | 2.15021 | 2.02597 | 1.66132 |
| chr18, mir-187  | 2.10522 | 1.95928 | 1.9871  | 1.92826 | 4.37275 | 2.05246 | 1.91565 | 1.57623 |
| chr18, mir-122a | 2.069   | 1.1296  | 1.7858  | 1.9416  | 4.3507  | 1.7723  | 2.8004  | 1.5617  |
| chr19, mir-637  | 2.03154 | 1.99846 | 1.99795 | 1.97154 | 1.93026 | 1.99692 | 2.05974 | 1.73923 |
| chr19, mir-7-3  | 2.0566  | 1.9736  | 1.8578  | 2.0192  | 1.9544  | 2.0788  | 1.9924  | 1.6798  |
| chr19, mir-638  | 2.19578 | 2.054   | 1.96867 | 2.02578 | 2.00533 | 2.078   | 2.11889 | 1.63578 |
| chr19, mir-199a | 2.0402  | 2.00235 | 1.91235 | 1.96686 | 1.94902 | 1.99784 | 1.99196 | 1.63255 |
| chr19, mir-24-2 | 2.075   | 2.02865 | 1.94288 | 1.98154 | 1.93519 | 2.07115 | 2.03789 | 1.6875  |
| chr19, mir-181c | 2.08473 | 2.00345 | 1.93654 | 1.98036 | 1.94418 | 1.98636 | 1.97709 | 1.67455 |
| chr19, mir-639  | 2.12587 | 1.9664  | 1.92027 | 1.99173 | 1.95747 | 2.07907 | 2.1152  | 1.71707 |
| chr19, mir-640  | 2.12635 | 2.02288 | 1.97548 | 2.05529 | 1.98288 | 2.07885 | 2.09423 | 1.72183 |
| chr19, mir-641  | 1.98945 | 1.94909 | 1.91164 | 1.95655 | 1.92727 | 1.97655 | 2.00545 | 1.67636 |
| chr19, mir-330  | 2.12775 | 1.96143 | 1.92612 | 1.98184 | 1.97286 | 2.00184 | 3.20327 | 1.65531 |
| chr19, mir-642  | 2.14547 | 2.03415 | 1.94075 | 2.0117  | 1.96679 | 2.05189 | 3.15792 | 1.64264 |
| chr19, mir-769  | 2.09912 | 2.00175 | 1.90772 | 1.95228 | 1.95035 | 2.00175 | 3.08263 | 1.64544 |
| chr19, mir-150  | 2.11413 | 1.96143 | 2.58762 | 1.9819  | 1.99667 | 2.04968 | 3.38508 | 1.67714 |
| chr19, mir-99b, | 2.087   | 1.92371 | 2.49171 | 1.86386 | 1.86057 | 1.88614 | 3.03129 | 1.60671 |
| chr19, mir-643  | 2.15734 | 1.90835 | 2.81911 | 1.86861 | 1.98089 | 2.03317 | 3.34912 | 1.67911 |
| chr19, mir-512- | 2.03644 | 1.92    | 2.53856 | 1.87923 | 1.82588 | 1.91443 | 3.01093 | 1.62784 |
| chr20, mir-103- | 2.13991 | 2.81299 | 1.96855 | 2.03727 | 2.53556 | 2.11137 | 2.13051 | 1.96915 |
| chr20, mir-663  | 2.09577 | 2.40885 | 1.94038 | 1.88    | 2.21154 | 1.94    | 1.96038 | 1.89231 |
| chr20, mir-644  | 2.23509 | 2.89917 | 1.99852 | 2.10065 | 2.52815 | 2.14528 | 2.10796 | 2.55102 |
| chr20, mir-499  | 1.98853 | 2.5468  | 1.97067 | 1.9496  | 2.2928  | 1.98653 | 1.91493 | 2.15    |
| chr20, mir-645  | 2.05346 | 1.16449 | 1.90626 | 1.98486 | 2.44729 | 2.02813 | 2.28439 | 1.87075 |
| chr20, mir-296  | 2.06189 | 1.07926 | 1.84926 | 1.92232 | 2.38842 | 1.87716 | 1.59505 | 1.84705 |
| chr20, mir-646  | 1.97918 | 1.08959 | 1.78296 | 1.85806 | 2.22592 | 1.85143 | 1.4799  | 1.85857 |
| chr20, mir-1-1, | 1.95953 | 2.44359 | 1.95453 | 1.95312 | 2.16906 | 1.97937 | 1.51141 | 1.87047 |
| chr20, mir-124a | 1.89929 | 2.47464 | 1.95768 | 1.90107 | 2.12446 | 1.91804 | 1.50304 | 1.83804 |
| chr20, mir-647  | 2.00942 | 2.57942 | 2.00942 | 1.94077 | 2.26577 | 2.04192 | 1.57269 | 1.85731 |
| chr21, mir-99a, | 2.12039 | 1.94589 | 1.80015 | 1.82077 | 2.24008 | 2.00426 | 1.87023 | 1.84729 |
| chr21, mir-125b | 2.12222 | 1.95975 | 1.82247 | 1.85593 | 2.27827 | 2.06389 | 1.8829  | 1.8837  |



|                 |         |         |         |         |         |         |         |         |
|-----------------|---------|---------|---------|---------|---------|---------|---------|---------|
| chr1, mir-200b, | 1.87395 | 1.92674 | 2.17651 | 2.11046 | 1.93302 | 2.07023 | 1.92093 | 2.08767 |
| chr1, mir-551a  | 1.75581 | 1.9729  | 2.11452 | 2.18065 | 1.93548 | 2.03    | 1.90774 | 2.06452 |
| chr1, mir-34a   | 2.25253 | 1.98307 | 2.12987 | 2.0872  | 2.02747 | 2.10867 | 2.01707 | 2.89933 |
| chr1, mir-801   | 2.32714 | 2.06476 | 2.1119  | 1.95119 | 2.04691 | 2.11024 | 2.08643 | 1.91452 |
| chr1, mir-552   | 1.99909 | 2.01195 | 2.11753 | 2.08597 | 1.94974 | 2.01247 | 1.87883 | 2.12714 |
| chr1, AGO4, A   | 2.4313  | 2.09104 | 2.08534 | 1.89137 | 2.11822 | 2.0216  | 2.17916 | 1.8735  |
| chr1, mir-30e,  | 2.28662 | 2.06147 | 2.04132 | 1.87015 | 2.04654 | 2.00581 | 2.01029 | 1.92507 |
| chr1, mir-101-1 | 2.2346  | 2.01579 | 2.02611 | 1.89365 | 2.12944 | 1.95754 | 1.74079 | 1.83905 |
| chr1, SERBP1    | 2.30435 | 2.06652 | 1.83326 | 1.57299 | 2.01826 | 1.91994 | 2.03092 | 1.67908 |
| chr1, mir-186   | 2.13101 | 2.00825 | 1.77933 | 1.58926 | 1.99389 | 1.91134 | 1.86906 | 1.59383 |
| chr1, mir-137   | 2.12165 | 1.86813 | 2.02392 | 1.88614 | 1.88733 | 1.88557 | 2.03386 | 1.79977 |
| chr1, mir-553   | 2.27048 | 2.08464 | 2.04488 | 1.838   | 2.08792 | 1.92744 | 2.05672 | 1.8212  |
| chr1, mir-197   | 2.39688 | 2.09326 | 2.02972 | 1.8756  | 2.08929 | 1.0883  | 2.07418 | 1.78156 |
| chr1, DDX20     | 2.34351 | 2.01897 | 2.08752 | 1.91924 | 2.08449 | 1.13141 | 2.09443 | 1.88546 |
| chr1, mir-554   | 2.06655 | 1.93881 | 2.84405 | 2.87369 | 1.94976 | 2.00619 | 1.92881 | 1.93655 |
| chr1, mir-92b   | 2.00259 | 1.87241 | 2.79667 | 2.7363  | 1.87195 | 2.06731 | 1.88    | 1.97565 |
| chr1, mir-555   | 2.38205 | 2.0033  | 2.94054 | 2.81518 | 2.00723 | 1.99955 | 2.06357 | 1.87473 |
| chr1, mir-9-1   | 2.13283 | 1.93299 | 2.94504 | 2.92677 | 1.95866 | 2.05787 | 1.93898 | 2.00433 |
| chr1, mir-765   | 1.99099 | 1.94234 | 2.83622 | 2.97676 | 1.90513 | 2.03946 | 1.84775 | 2.05748 |
| chr1, mir-556   | 2.00613 | 1.99073 | 2.82898 | 2.92803 | 1.9092  | 1.89737 | 1.82175 | 1.97978 |
| chr1, mir-557   | 2.03921 | 2.00606 | 2.81598 | 2.98913 | 1.96866 | 1.88205 | 1.80882 | 1.95701 |
| chr1, mir-214,  | 1.96667 | 1.84713 | 2.67661 | 2.79359 | 1.89092 | 1.92185 | 1.99764 | 1.75226 |
| chr1, mir-488   | 1.85546 | 1.8366  | 2.68943 | 2.9144  | 1.77887 | 1.87709 | 2.01156 | 1.91574 |
| chr1, mir-181b- | 2.35791 | 2.0077  | 2.74507 | 1.35872 | 2.02426 | 1.78784 | 2.10932 | 1.52851 |
| chr1, mir-135b  | 2.12306 | 1.90877 | 2.91928 | 1.97857 | 1.89194 | 2.01398 | 1.88337 | 1.9651  |
| chr1, mir-29c,  | 2.05781 | 1.95838 | 2.81556 | 1.68294 | 1.90987 | 1.98237 | 1.79019 | 1.62144 |
| chr1, mir-205   | 1.90027 | 1.84193 | 2.65376 | 1.81798 | 1.80725 | 1.99275 | 1.73174 | 1.82    |
| chr1, mir-215,  | 2.13336 | 1.9282  | 2.7223  | 1.48074 | 2.03877 | 1.83648 | 2.00533 | 1.52074 |
| chr2, mir-558   | 2.357   | 2.08891 | 1.94227 | 1.68145 | 2.08727 | 2.63509 | 2.11127 | 1.68436 |
| chr2, mir-559   | 2.37319 | 2.03064 | 2.07053 | 2       | 2.0183  | 2.76755 | 2.09085 | 1.98883 |
| chr2, mir-217,  | 2.12873 | 2.09149 | 1.97284 | 1.98134 | 1.88    | 4.62493 | 1.90336 | 2.00567 |
| chr2, mir-560   | 1.85111 | 1.94    | 1.90778 | 1.89333 | 1.92111 | 1.88111 | 1.69222 | 1.68667 |
| chr2, mir-128a  | 2.46444 | 2.12609 | 2.02774 | 1.76338 | 2.1494  | 1.9715  | 2.17263 | 1.76368 |
| chr2, mir-10b   | 1.92084 | 1.91084 | 2.02832 | 1.9974  | 1.9179  | 1.96983 | 1.83345 | 2.80815 |
| chr2, mir-561   | 1.94158 | 1.91712 | 1.84489 | 1.90238 | 1.88597 | 1.88187 | 1.74928 | 2.58209 |
| chr2, mir-26b   | 2.06102 | 1.90949 | 2.10407 | 2.0178  | 1.92593 | 2.05017 | 1.91254 | 1.99797 |
| chr2, mir-375   | 1.98495 | 1.94387 | 2.13656 | 2.08677 | 1.90548 | 2.06022 | 1.92129 | 2.16258 |

|                  |         |         |         |         |         |         |         |         |
|------------------|---------|---------|---------|---------|---------|---------|---------|---------|
| chr2, mir-153-1  | 2.06679 | 1.9459  | 2.11564 | 2.005   | 1.94308 | 2.04051 | 1.95077 | 1.98128 |
| chr2, mir-562    | 2.2045  | 2.11983 | 2.05867 | 1.43167 | 2.05783 | 2.01533 | 2.0225  | 1.97217 |
| chr2, mir-149    | 1.8775  | 1.9795  | 2.1035  | 1.7125  | 1.96575 | 1.9785  | 1.86325 | 2.0245  |
| chr3, mir-563    | 2.21429 | 2.08556 | 2.99873 | 1.96952 | 2.03016 | 2.01016 | 2.01635 | 1.87857 |
| chr3, mir-128b   | 2.17451 | 1.94281 | 1.91335 | 1.75762 | 1.86067 | 1.83896 | 1.83713 | 1.91226 |
| chr3, mir-26a-1  | 2.10355 | 2.02008 | 2.05621 | 1.94137 | 2.0046  | 1.93863 | 1.97282 | 2.01355 |
| chr3, mir-138-1  | 2.02794 | 1.96389 | 2.07072 | 1.94111 | 1.91579 | 1.91325 | 2.03968 | 1.8304  |
| chr3, mir-564    | 2.09272 | 2.02554 | 2.04739 | 1.95413 | 1.99696 | 1.95196 | 1.90489 | 1.93022 |
| chr3, mir-565    | 2.3629  | 2.08194 | 2.02298 | 1.76597 | 2.04314 | 1.96315 | 1.98048 | 1.73169 |
| chr3, mir-425, l | 2.14636 | 2.02838 | 2.13485 | 1.90858 | 1.9697  | 2.17576 | 1.97636 | 1.9201  |
| chr3, mir-566    | 2.16559 | 1.99966 | 2.17119 | 2.09034 | 2.03475 | 2.08746 | 2       | 2.06458 |
| chr3, let-7g, mi | 2.34558 | 1.98182 | 2.09387 | 1.92646 | 2.00884 | 2.06442 | 2.02917 | 1.89613 |
| chr3, mir-567    | 2.25241 | 1.9335  | 1.9646  | 1.52044 | 2.03007 | 1.9154  | 1.98    | 1.47876 |
| chr3, mir-568    | 2.13197 | 2.02108 | 1.98535 | 1.84491 | 1.96955 | 1.88146 | 1.89879 | 1.76089 |
| chr3, mir-198    | 2.05704 | 1.96408 | 1.96648 | 1.95672 | 1.9696  | 2.00696 | 1.88512 | 1.88208 |
| chr3, mir-15b, l | 2.17013 | 1.91299 | 1.75662 | 1.39727 | 2.0039  | 1.90942 | 1.93623 | 1.3624  |
| chr3, mir-551b   | 2.17845 | 1.94505 | 1.87214 | 1.99214 | 1.85272 | 2.70981 | 1.85146 | 1.84107 |
| chr3, mir-569    | 2.02252 | 1.98267 | 1.94237 | 2.12793 | 1.90926 | 2.82548 | 1.76911 | 1.93111 |
| chr3, mir-28     | 2.28254 | 1.91752 | 1.9484  | 1.38964 | 2.58065 | 1.90278 | 2.08562 | 3.51242 |
| chr3, mir-570    | 2.01132 | 2.18605 | 2.01    | 2.78526 | 2.53368 | 1.97737 | 2.20842 | 5.06105 |
| chr4, mir-571    | 2.28    | 2.25    | 1.96353 | 2.03647 | 2.10588 | 1.89941 | 2.20647 | 1.90588 |
| chr4, mir-95     | 2.06086 | 2.04429 | 2.167   | 2.02629 | 2.00471 | 2.01171 | 1.76414 | 2.05886 |
| chr4, mir-572    | 1.97114 | 1.94177 | 1.9243  | 1.91177 | 1.86797 | 1.96089 | 1.85354 | 1.76797 |
| chr4, mir-218-1  | 2.03774 | 1.88355 | 1.97542 | 1.86542 | 1.90252 | 1.89219 | 1.94271 | 1.70652 |
| chr4, mir-573    | 2.11961 | 2.06536 | 1.92394 | 1.70236 | 2.00787 | 1.97583 | 1.92087 | 1.65095 |
| chr4, mir-574    | 2.45394 | 2.09354 | 2.02141 | 1.92141 | 2.06616 | 1.98404 | 2.10374 | 1.81353 |
| chr4, mir-575    | 2.22884 | 1.97971 | 2.13262 | 2.02243 | 1.98573 | 2.01204 | 1.9634  | 1.93913 |
| chr4, mir-576    | 2.2475  | 2.00259 | 1.99707 | 1.66724 | 2.03879 | 1.95086 | 2.11914 | 1.60793 |
| chr4, mir-367, l | 2.30697 | 2.0247  | 1.99159 | 1.8775  | 2.05553 | 1.9078  | 2.01841 | 1.73871 |
| chr4, mir-577    | 2.11392 | 1.97006 | 1.97886 | 1.79934 | 1.91771 | 1.8891  | 1.89464 | 1.75849 |
| chr4, mir-578    | 2.23802 | 1.91905 | 1.95421 | 1.78484 | 2.05786 | 1.84508 | 1.97524 | 1.75627 |
| chr5, Droscha    | 2.04921 | 1.93191 | 3.68593 | 1.83608 | 2.76096 | 2.7064  | 1.8476  | 1.7944  |
| chr5, mir-579    | 2.26823 | 1.94422 | 3.7768  | 1.66265 | 2.90673 | 2.63857 | 2.05708 | 1.64925 |
| chr5, mir-580    | 2.194   | 1.96672 | 3.46    | 1.6352  | 2.75744 | 2.6388  | 1.786   | 1.60744 |
| chr5, mir-581    | 2.05112 | 1.91709 | 1.93127 | 1.79828 | 2.7006  | 1.82411 | 1.76269 | 1.6447  |
| chr5, mir-449, l | 2.07015 | 1.89913 | 1.96515 | 1.88333 | 2.88703 | 1.83283 | 2.00246 | 1.80928 |
| chr5, mir-582    | 1.89992 | 1.9975  | 1.94167 | 1.87958 | 2.62733 | 1.82592 | 1.80392 | 1.59583 |

|                  |         |         |         |         |         |         |         |         |
|------------------|---------|---------|---------|---------|---------|---------|---------|---------|
| chr5, mir-9-2    | 2.16231 | 1.83375 | 2.01194 | 1.72106 | 2.79869 | 1.86781 | 1.94294 | 1.52694 |
| chr5, mir-583    | 2.13639 | 2.01519 | 1.95985 | 1.9315  | 2.81429 | 1.89511 | 1.93632 | 1.08353 |
| chr5, mir-584    | 2.06494 | 1.94879 | 1.98795 | 2.04819 | 2.68337 | 2.72265 | 1.9959  | 2.04108 |
| chr5, mir-143, l | 2.00337 | 1.88109 | 2.05485 | 2.02574 | 2.61356 | 2.71089 | 1.94703 | 2.01416 |
| chr5, mir-378    | 2.12663 | 2.0194  | 2.04964 | 1.98976 | 2.75036 | 2.74325 | 1.98675 | 1.96181 |
| chr5, mir-146a   | 2.09252 | 1.96778 | 1.92303 | 1.72848 | 2.8005  | 2.69768 | 1.98626 | 1.59899 |
| chr5, mir-103-1  | 2.00788 | 1.84076 | 1.82962 | 1.62977 | 2.92568 | 2.7372  | 1.97583 | 1.55561 |
| chr5, mir-218-2  | 1.88533 | 1.86206 | 1.95075 | 1.90393 | 2.71047 | 2.70794 | 1.96869 | 1.86878 |
| chr5, mir-585    | 1.91682 | 1.86018 | 1.97782 | 1.94991 | 2.66391 | 2.741   | 1.93136 | 1.13164 |
| chr5, mir-340    | 2.17484 | 1.98237 | 1.98538 | 1.95871 | 2.89194 | 2.66247 | 1.9429  | 1.06226 |
| chr6, mir-548a-a | 2.3887  | 2.00114 | 1.99675 | 1.44748 | 1.99748 | 1.86065 | 2.0626  | 1.90764 |
| chr6, mir-219-1  | 2.06536 | 1.91856 | 2.12083 | 1.5568  | 1.9032  | 2.07608 | 1.89639 | 1.97289 |
| chr6, XPO5       | 2.30756 | 2.00006 | 2.02801 | 1.88122 | 1.99314 | 2.02433 | 2.01811 | 1.93875 |
| chr6, mir-586    | 2.09897 | 2.04612 | 1.86991 | 2.01138 | 1.93034 | 1.86612 | 2.00879 | 1.9394  |
| chr6, mir-206, l | 2.2605  | 1.96331 | 1.97568 | 1.94813 | 1.96957 | 1.93597 | 1.99827 | 1.95007 |
| chr6, mir-30c-2  | 2.08792 | 2.01534 | 2.10765 | 1.89015 | 1.89235 | 1.88572 | 1.89455 | 1.86958 |
| chr6, mir-587    | 2.36518 | 2.05173 | 2.12364 | 1.50409 | 2.11955 | 2.05064 | 2.07973 | 2.03818 |
| chr6, mir-548b   | 2.24929 | 2.08035 | 2.02637 | 1.37212 | 2.10699 | 1.92283 | 2.06027 | 1.93451 |
| chr6, mir-588    | 2.23131 | 2.09    | 1.97213 | 1.46197 | 2.20902 | 1.91098 | 2.13475 | 1.92213 |
| chr6, mir-548a-a | 2.48898 | 1.18228 | 2.12835 | 1.42953 | 2.22291 | 2.11709 | 2.00457 | 1.80787 |
| chr7, mir-339    | 1.93553 | 2.20605 | 2.03342 | 2.10079 | 1.82368 | 1.92132 | 2.295   | 2.31105 |
| chr7, mir-589    | 1.94255 | 2.52353 | 1.99902 | 2.19078 | 1.84039 | 1.9702  | 2.55314 | 2.50569 |
| chr7, mir-148a   | 2.16417 | 2.69427 | 1.92562 | 2.0425  | 1.96917 | 1.85802 | 2.67844 | 2.42729 |
| chr7, mir-196b   | 1.99271 | 2.65708 | 1.98531 | 2.19802 | 1.90448 | 1.83938 | 2.71385 | 2.64208 |
| chr7, mir-550-1  | 2.31185 | 2.80469 | 1.79111 | 1.72494 | 1.94247 | 1.81469 | 2.95272 | 1.9921  |
| chr7, has-mir-5  | 2.25000 | 2.63000 | 1.85000 | 1.85000 | 1.86000 | 1.80000 | 2.66000 | 2.17000 |
| chr7, mir-590    | 2.23785 | 2.7843  | 1.88634 | 2.01484 | 1.97247 | 1.98366 | 2.74527 | 2.34817 |
| chr7, mir-653, l | 1.95225 | 2.62194 | 2.58025 | 2.18519 | 1.82094 | 2.35206 | 2.68712 | 2.55037 |
| chr7, mir-591    | 1.80184 | 2.52024 | 2.53216 | 1.9132  | 1.9412  | 2.42552 | 2.44688 | 2.14384 |
| chr7, mir-25, m  | 2.00885 | 2.4554  | 2.71407 | 2.05655 | 1.80062 | 2.55681 | 2.50867 | 2.44982 |
| chr7, mir-592    | 1.95531 | 2.82023 | 1.933   | 2.35531 | 1.84969 | 2.41831 | 2.60023 | 2.74223 |
| chr7, SDN1, m    | 2.13502 | 2.84924 | 1.95607 | 1.98113 | 1.93001 | 2.55359 | 2.82114 | 2.46163 |
| chr7, mir-129-1  | 2.08876 | 2.64067 | 2.03618 | 2.17202 | 1.9318  | 2.5582  | 2.63562 | 2.69135 |
| chr7, mir-182, l | 1.93273 | 2.49394 | 2.03818 | 2.17232 | 1.90343 | 2.44849 | 2.43465 | 2.58131 |
| chr7, mir-335    | 2.08133 | 2.76141 | 1.97469 | 2.22789 | 1.91969 | 2.45898 | 2.7093  | 2.66914 |
| chr7, mir-29a, l | 2.19705 | 2.78937 | 1.84126 | 1.97263 | 1.94358 | 2.52221 | 2.84042 | 2.25526 |
| chr7, mir-490    | 2.02781 | 2.6568  | 1.80432 | 2.17391 | 1.75751 | 2.31769 | 2.41065 | 2.47686 |

|                 |         |         |          |         |         |         |         |         |
|-----------------|---------|---------|----------|---------|---------|---------|---------|---------|
| chr7, has-mir-5 | 2.04476 | 2.82536 | 1.94262  | 1.98    | 2.0006  | 1.99619 | 2.63679 | 2.24667 |
| chr7, mir-671   | 1.92096 | 2.44481 | 2.00106  | 2.11096 | 1.8976  | 1.90654 | 2.36202 | 2.38721 |
| chr7, mir-153-2 | 2.03884 | 2.68581 | 2.00942  | 2.20919 | 1.8764  | 1.94872 | 2.59918 | 2.73081 |
| chr7, mir-595   | 1.8321  | 2.4779  | 1.96877  | 2.14037 | 1.79148 | 1.89506 | 2.48445 | 2.55926 |
| chr8, mir-596   | 2.0213  | 1.1229  | 2.00507  | 1.67754 | 1.22246 | 1.11493 | 1.10246 | 1.84348 |
| chr8, mir-597   | 2.2229  | 1.15097 | 1.93883  | 1.72166 | 1.14766 | 1.99972 | 2.11262 | 1.668   |
| chr8, mir-124a- | 2.01429 | 1.16616 | 2.02125  | 2.12027 | 1.16902 | 2.01357 | 1.9458  | 2.08893 |
| chr8, mir-598   | 2.28035 | 1.27    | 2.08322  | 2.04437 | 1.19195 | 2.06368 | 1.92678 | 2.00333 |
| chr8, mir-383   | 1.97791 | 1.04618 | 1.89145  | 1.93336 | 1.00055 | 1.944   | 1.81745 | 1.74545 |
| chr8, mir-320,  | 2.35686 | 1.18596 | 2.11337  | 2.03927 | 1.16622 | 2.04023 | 2.085   | 2.03951 |
| chr8, mir-486   | 2.11812 | 1.28894 | 2.08741  | 1.96424 | 1.26871 | 2.028   | 1.89129 | 1.946   |
| chr8, mir-124a- | 1.96647 | 1.87474 | 1.94494  | 2.01167 | 2.94103 | 1.92545 | 1.91276 | 1.83442 |
| chr8, mir-599   | 2.10195 | 2.12497 | 1.90631  | 1.77027 | 3.08779 | 2.65262 | 2.01779 | 1.78429 |
| chr8, mir-548a- | 1.9418  | 1.93369 | 2.71631  | 1.93672 | 2.75738 | 2.64459 | 1.69254 | 1.79197 |
| chr8, mir-548d- | 2.25045 | 1.98246 | 2.75224  | 1.98366 | 2.94701 | 2.53269 | 2.94224 | 1.80037 |
| chr8, mir-30b,  | 2.15783 | 1.89164 | 1.86224  | 1.64967 | 2.71454 | 2.44612 | 1.89454 | 2.33197 |
| chr8, AGO2      | 2.20954 | 1.99411 | 2.0483   | 1.94593 | 2.78491 | 2.67302 | 2.00448 | 2.64833 |
| chr8, mir-151   | 2.32441 | 2.03575 | 2.04758  | 1.8835  | 2.91058 | 2.71717 | 2.04667 | 2.6615  |
| chr8, mir-661   | 1.82946 | 1.91324 | 2.06919  | 2.00784 | 2.21243 | 2.37811 | 1.80054 | 2.41946 |
| chr9, mir-101-2 | 2.24245 | 2.03325 | 1.1696   | 1.87854 | 2.05046 | 2.01007 | 2.02934 | 1.88729 |
| chr9, mir-491   | 2.20522 | 2.11105 | 3.66799  | 1.84985 | 2.2056  | 1.97403 | 2.07403 | 1.74022 |
| chr9, mir-31    | 2.18864 | 2.13373 | 0.155508 | 2.03975 | 2.09678 | 1.95542 | 2.10331 | 1.9378  |
| chr9, mir-204   | 1.95044 | 1.94832 | 2.02226  | 1.95131 | 1.89051 | 1.95591 | 1.79993 | 1.78226 |
| chr9, mir-7-1   | 2.1865  | 1.91092 | 1.74717  | 1.84267 | 2.07658 | 1.90808 | 2.02458 | 1.45133 |
| chr9, let-7a-1, | 2.31866 | 2.05598 | 1.9266   | 1.77361 | 2.09361 | 1.90495 | 1.9766  | 1.74629 |
| chr9, mir-23b,  | 1.9941  | 1.96333 | 2.03     | 2.04667 | 1.96295 | 1.93943 | 1.89114 | 1.98381 |
| chr9, mir-32    | 2.11141 | 2.00914 | 1.95445  | 1.76148 | 2.09594 | 1.99352 | 1.90984 | 1.69008 |
| chr9, mir-455   | 1.98305 | 1.93038 | 2.11133  | 2.05552 | 1.928   | 1.98086 | 1.87209 | 1.974   |
| chr9, mir-147   | 1.99687 | 2.03042 | 2.06     | 2.07531 | 1.93365 | 1.96031 | 1.85094 | 2.11167 |
| chr9, mir-600   | 2.31504 | 2.03241 | 2.05818  | 1.7781  | 1.99518 | 1.95401 | 2.03956 | 1.84255 |
| chr9, mir-601   | 2.15125 | 1.97479 | 2.15104  | 1.98167 | 1.9324  | 1.985   | 1.94156 | 1.96542 |
| chr9, mir-181a- | 2.33405 | 2.03931 | 2.02759  | 2.02595 | 2.05414 | 1.99146 | 2.00086 | 1.89603 |
| chr9, mir-199b  | 2.09855 | 1.94709 | 2.08709  | 2.13764 | 1.92945 | 2.68527 | 1.91691 | 2.05818 |
| chr9, mir-219-2 | 2.04882 | 1.91329 | 2.11461  | 2.17237 | 1.90776 | 2.89908 | 1.90474 | 2.06934 |
| chr9, mir-126   | 1.83037 | 1.87444 | 2.11407  | 2.17444 | 1.87556 | 2.37889 | 1.82926 | 2.02519 |
| chr9, mir-602   | 1.99632 | 2.01526 | 2.10421  | 2.27921 | 1.95263 | 2.71316 | 1.85763 | 2.04132 |
| chr10, mir-511- | 1.89    | 1.69    | 1.155    | 2.42    | 1.785   | 1.115   | 1.755   | 2.685   |



|                 |         |         |         |         |         |         |         |         |
|-----------------|---------|---------|---------|---------|---------|---------|---------|---------|
| chr10, mir-603  | 1.8981  | 1.86331 | 1.06074 | 2.52587 | 1.81512 | 1.0543  | 1.66446 | 2.69454 |
| chr10, mir-604  | 2.1383  | 1.91459 | 1.08815 | 1.99852 | 1.98059 | 1.10044 | 1.84585 | 2.90904 |
| chr10, mir-605  | 2.1338  | 1.95635 | 1.88489 | 1.95971 | 1.91387 | 1.90766 | 1.85255 | 2.82569 |
| chr10, mir-606  | 2.08172 | 1.98043 | 2.00903 | 2.09538 | 2.00763 | 1.98118 | 1.97903 | 2.93624 |
| chr10, mir-346  | 2.15851 | 1.94095 | 2.14014 | 1.72122 | 1.88878 | 1.94041 | 1.23892 | 2.82784 |
| chr10, mir-107  | 2.16219 | 2.0493  | 2.04491 | 1.57895 | 1.93509 | 1.915   | 1.09658 | 1.83202 |
| chr10, mir-607  | 2.46258 | 2.06918 | 2.0366  | 1.51443 | 2.04124 | 2.04897 | 1.1466  | 1.67258 |
| chr10, mir-608  | 2.13339 | 2.01587 | 2.08868 | 1.96512 | 1.99306 | 2.03678 | 2.00446 | 1.9543  |
| chr10, mir-146b | 2.10129 | 1.96032 | 2.11081 | 2.00726 | 1.99194 | 2.04855 | 2.00661 | 1.98274 |
| chr10, mir-609  | 2.30354 | 2.02487 | 2.01416 | 1.99115 | 2.02212 | 1.9585  | 1.96982 | 1.91947 |
| chr10, mir-202  | 1.95    | 1.94976 | 2.14098 | 2.06878 | 1.93415 | 1.99732 | 1.8839  | 1.93146 |
| chr11, mir-210  | 2.04932 | 2.39909 | 2.13477 | 2.07545 | 1.97045 | 2.04955 | 1.93591 | 2.01227 |
| chr11, mir-483  | 2.0147  | 2.64303 | 2.15606 | 2.12409 | 1.95348 | 2.01636 | 1.90485 | 2.05136 |
| chr11, mir-610  | 1.99914 | 2.69259 | 1.81425 | 1.63    | 1.98439 | 1.81245 | 2.01475 | 1.41755 |
| chr11, mir-129a | 2.10587 | 2.78664 | 2.01119 | 1.97909 | 1.96168 | 1.90161 | 1.9642  | 1.90042 |
| chr11, mir-130a | 2.16138 | 2.74782 | 2.04943 | 1.89678 | 2.04736 | 1.96621 | 1.97035 | 1.84391 |
| chr11, mir-611  | 2.05145 | 2.6947  | 2.09504 | 1.94273 | 2.00291 | 2.05068 | 1.91513 | 1.9312  |
| chr11, mir-192  | 2.0769  | 2.48586 | 2.11397 | 2.01017 | 1.93172 | 2.11793 | 1.975   | 1.85724 |
| chr11, mir-612  | 2.35078 | 2.76818 | 1.89857 | 1.59662 | 2.00935 | 2.0987  | 2.05078 | 1.59078 |
| chr11, MALAT1   | 2.47214 | 2.8901  | 1.79837 | 1.36204 | 2.08296 | 2.15306 | 2.12623 | 1.61541 |
| chr11, mir-139  | 1.94386 | 2.51229 | 2.14651 | 2.03566 | 1.88458 | 2.0747  | 1.87626 | 2.04446 |
| chr11, mir-326  | 1.96611 | 2.58764 | 2.10236 | 2.01903 | 1.88875 | 2.04806 | 1.87208 | 2.01236 |
| chr11, PIWIL4   | 2.0481  | 2.79963 | 1.92217 | 1.8901  | 1.93122 | 1.90621 | 1.80878 | 1.81041 |
| chr11, mir-34b  | 2.41658 | 2.88623 | 1.99507 | 1.39863 | 2.04801 | 1.82904 | 2.06349 | 1.91027 |
| chr11, mir-125b | 2.19583 | 2.95042 | 1.98887 | 1.51131 | 1.97524 | 1.83048 | 1.93935 | 2.05958 |
| chr11, let-7a-2 | 2.17522 | 2.92588 | 1.97923 | 1.47753 | 1.93615 | 1.83901 | 1.90703 | 2.05434 |
| chr12, mir-200c | 2.16981 | 1.93178 | 2.74215 | 1.92252 | 1.95804 | 2.00897 | 1.96299 | 1.86    |
| chr12, mir-613  | 2.18074 | 1.94086 | 2.85    | 1.75802 | 1.95    | 1.86025 | 1.93407 | 1.68642 |
| chr12, mir-614  | 2.03026 | 1.93447 | 2.84553 | 1.96921 | 1.91395 | 1.92605 | 1.86965 | 1.87483 |
| chr12, mir-196a | 2.02897 | 1.89776 | 2.72542 | 1.99308 | 1.87243 | 2.6485  | 1.87794 | 2.78935 |
| chr12, mir-615  | 2.14566 | 1.86828 | 2.80959 | 1.95574 | 1.84402 | 2.79188 | 1.81779 | 2.8073  |
| chr12, mir-148b | 2.23102 | 1.90966 | 2.72152 | 1.85297 | 1.94509 | 2.74983 | 1.94398 | 2.65991 |
| chr12, mir-616  | 2.12687 | 1.90343 | 1.93535 | 1.7202  | 1.95606 | 2.02444 | 1.92616 | 2.38313 |
| chr12, mir-26a  | 2.15461 | 1.89539 | 1.96391 | 1.86435 | 1.91026 | 1.96539 | 1.8747  | 2.5913  |
| chr12, let-7i   | 2.01148 | 1.8408  | 1.75858 | 1.43809 | 1.99469 | 1.88568 | 1.85457 | 2.03765 |
| chr12, mir-548c | 2.14758 | 1.90917 | 1.79    | 1.47317 | 1.9535  | 1.90475 | 1.95908 | 2.03742 |
| chr12, mir-617  | 1.96204 | 1.85445 | 1.92562 | 1.64526 | 1.80547 | 1.82511 | 1.76036 | 1.67212 |

|                  |         |         |         |         |         |         |         |         |
|------------------|---------|---------|---------|---------|---------|---------|---------|---------|
| chr12, mir-618   | 1.91972 | 1.83083 | 1.90462 | 1.75159 | 1.778   | 1.81214 | 1.72979 | 1.67979 |
| chr12, mir-492   | 2.23588 | 1.95015 | 1.95397 | 1.75456 | 1.94059 | 1.92    | 1.90515 | 1.85588 |
| chr12, mir-331   | 2.37611 | 2.07901 | 1.9671  | 1.71618 | 2.07817 | 1.8784  | 2.12901 | 1.66817 |
| chr12, mir-135a  | 2.0002  | 1.9234  | 1.89207 | 1.93373 | 1.81027 | 1.82127 | 1.70093 | 1.8922  |
| chr12, mir-619   | 2.26879 | 1.94371 | 2.03612 | 1.93785 | 1.95397 | 1.98991 | 1.96466 | 1.92138 |
| chr12, mir-620   | 2.07933 | 2.04416 | 1.93195 | 1.73456 | 1.93779 | 1.8404  | 1.89161 | 1.68483 |
| chr12, PIWIL1    | 2.05214 | 1.98143 | 1.91223 | 1.99071 | 1.88273 | 1.83949 | 1.84525 | 1.89114 |
| chr12, RAN       | 2.27602 | 2.00667 | 1.82154 | 1.8259  | 1.92577 | 1.85898 | 2.00423 | 1.71    |
| chr13, mir-621   | 2.2329  | 4.24242 | 2.01839 | 2.35871 | 2.00355 | 2.72435 | 2.05371 | 1.84742 |
| chr13, mir-16-1  | 2.5386  | 3.24579 | 1.88223 | 1.35405 | 2.19711 | 2.93719 | 2.18901 | 1.4024  |
| chr13, mir-622   | 4.48829 | 2.65297 | 1.82892 | 1.74117 | 1.90829 | 2.57631 | 1.71964 | 1.63342 |
| chr13, mir-17, 1 | 8.28834 | 4.29631 | 1.55489 | 1.65113 | 1.97474 | 2.63113 | 1.71338 | 1.74962 |
| chr13, mir-623   | 1.35152 | 1.12303 | 1.99647 | 1.73505 | 2.00495 | 2.87071 | 1.96515 | 1.62293 |
| chr14, mir-208   | 2.0656  | 2.01193 | 2.12743 | 2.07028 | 1.96459 | 2.03908 | 1.92367 | 2.07431 |
| chr14, mir-624   | 2.14702 | 2.0019  | 2.03548 | 1.7019  | 2.05476 | 1.93857 | 2.12833 | 1.77738 |
| chr14, mir-625   | 2.54517 | 1.12264 | 2.22575 | 1.73954 | 2.15598 | 1.98092 | 2.23988 | 1.57782 |
| chr14, Dicer1    | 2.32666 | 1.15107 | 2.20259 | 1.82445 | 2.01094 | 1.89743 | 1.97898 | 1.8268  |
| chr14, mir-342   | 2.14333 | 1.21708 | 2.27344 | 1.93937 | 2.00083 | 2.01156 | 1.94865 | 1.96406 |
| chr14, mir-345   | 1.98981 | 1.43019 | 2.22463 | 1.97741 | 1.9513  | 1.99889 | 1.88833 | 1.86056 |
| chr14, mir-770,  | 1.99483 | 1.22349 | 2.25024 | 2.11899 | 1.93141 | 1.98094 | 1.85735 | 2.87715 |
| chr14, mir-379,  | 2.00717 | 1.24909 | 2.24774 | 2.15404 | 1.94096 | 1.97878 | 1.84339 | 2.96887 |
| chr14, mir-203   | 1.85529 | 1.96529 | 2.19412 | 2.13794 | 1.87059 | 2.01912 | 1.855   | 2.71265 |
| chr15, mir-211   | 2.22276 | 1.17245 | 2.11837 | 2.04571 | 2.1048  | 1.98367 | 1.99061 | 2.81551 |
| chr15, mir-626   | 2.45353 | 1.21047 | 2.08541 | 1.92353 | 2.27047 | 2.09847 | 2.20859 | 2.56671 |
| chr15, mir-627   | 2.36357 | 1.13551 | 2.08622 | 1.98449 | 2.17214 | 2.00469 | 2.10878 | 2.83602 |
| chr15, mir-628   | 2.22939 | 1.09849 | 1.91053 | 1.69955 | 2.24083 | 1.95273 | 2.09992 | 2.4175  |
| chr15, mir-190   | 2.07245 | 2.07    | 2.08733 | 2.11141 | 2.01496 | 2.04141 | 1.93252 | 3.02526 |
| chr15, mir-422a  | 2.10767 | 2.02055 | 2.13133 | 2.002   | 2.02133 | 2.07956 | 2.00756 | 2.669   |
| chr15, mir-629   | 2.2536  | 1.9464  | 2.11512 | 1.9636  | 2.03144 | 2.01392 | 2.01656 | 3.31736 |
| chr15, mir-630   | 2.2873  | 2.0727  | 2.03122 | 1.83356 | 2.2353  | 2.00539 | 2.08217 | 1.81278 |
| chr15, mir-631   | 2.03089 | 1.99215 | 2.10101 | 1.99823 | 2.03595 | 2.12722 | 1.9662  | 1.92797 |
| chr15, mir-184   | 2.07866 | 1.99625 | 2.05866 | 2.09134 | 2.04339 | 1.99839 | 1.97732 | 2.0575  |
| chr15, mir-549   | 2.09622 | 1.95468 | 2.05378 | 1.92027 | 2.02306 | 2.01577 | 1.88865 | 2.06234 |
| chr15, mir-7-2   | 2.20952 | 1.95441 | 2.03274 | 1.93119 | 2.03429 | 2.06905 | 1.93691 | 1.85369 |
| chr15, mir-9-3   | 2.00541 | 1.975   | 2.11745 | 2.03245 | 2.05765 | 2.06174 | 1.88939 | 2.05041 |
| chr16, mir-662   | 1.84077 | 1.89346 | 2.12462 | 2.06692 | 1.90731 | 2.08923 | 1.86038 | 2.02769 |
| chr16, mir-193b  | 2.30924 | 1.98989 | 2.07859 | 1.88141 | 2.64739 | 2.02946 | 2.04978 | 1.84098 |

|                 |         |         |         |         |         |         |         |         |
|-----------------|---------|---------|---------|---------|---------|---------|---------|---------|
| chr16, mir-484  | 2.3093  | 1.99    | 1.90444 | 1.79644 | 2.75574 | 1.97652 | 2.05591 | 1.78965 |
| chr16, mir-138- | 2.32083 | 1.99278 | 2.15546 | 1.99907 | 2.79259 | 2.09093 | 2.02    | 1.91602 |
| chr16, mir-328  | 1.99847 | 1.92724 | 2.10643 | 2.04133 | 2.47571 | 2.06592 | 1.90888 | 2.00724 |
| chr16, mir-140  | 2.11817 | 2.02317 | 2.12549 | 2.05476 | 2.75146 | 2.05488 | 2.01451 | 2.10402 |
| chr16, mir-768  | 2.45349 | 2.02546 | 2.0075  | 1.83388 | 3.02513 | 1.91217 | 2.11329 | 1.78967 |
| chr17, mir-22   | 2.148   | 1.9748  | 2.16853 | 2.12853 | 1.3128  | 2.138   | 2.03347 | 2.06987 |
| chr17, mir-132, | 2.10174 | 1.99    | 2.16302 | 2.09524 | 1.31571 | 2.12984 | 1.99286 | 2.04111 |
| chr17, mir-195, | 2.15019 | 2.01155 | 2.19039 | 2.06155 | 1.25107 | 2.16641 | 1.99495 | 2.0568  |
| chr17, mir-324  | 2.17563 | 1.96902 | 2.21536 | 2.0617  | 1.26786 | 2.1808  | 1.98661 | 2.04795 |
| chr17, mir-33b  | 1.91653 | 1.94528 | 2.14806 | 2.04653 | 1.46181 | 2.08417 | 1.94819 | 1.96958 |
| chr17, mir-451, | 2.22111 | 1.95537 | 2.02685 | 1.99889 | 2.69407 | 2.04852 | 2.00722 | 1.92704 |
| chr17, mir-423  | 2.42442 | 2.07905 | 2.03    | 1.83684 | 2.99842 | 2.01442 | 2.12474 | 1.81105 |
| chr17, mir-193a | 2.09556 | 1.96935 | 2.10798 | 1.98323 | 2.775   | 2.03984 | 1.96363 | 1.94177 |
| chr17, mir-632  | 2.46735 | 2.03425 | 2.02133 | 1.78381 | 3.10018 | 2.01274 | 2.07708 | 1.7823  |
| chr17, mir-152  | 2.13398 | 1.95528 | 2.05602 | 1.87611 | 2.73731 | 2.1112  | 1.98731 | 1.84824 |
| chr17, mir-10a  | 2.11602 | 1.96203 | 2.09407 | 2.04034 | 2.65661 | 2.07364 | 1.82059 | 2.08339 |
| chr17, mir-196a | 2.07196 | 1.98686 | 2.08931 | 2.05549 | 2.65284 | 2.03539 | 1.85745 | 2.05863 |
| chr17, mir-142  | 2.02793 | 1.93939 | 1.91317 | 1.69939 | 2.49805 | 2.10256 | 1.91    | 1.63805 |
| chr17, mir-454, | 2.23822 | 2.04948 | 1.99474 | 1.922   | 2.95267 | 2.02919 | 1.99548 | 1.73193 |
| chr17, mir-21   | 2.35734 | 2.06752 | 1.8811  | 1.67789 | 2.9156  | 2.00257 | 2.1111  | 1.47624 |
| chr17, mir-633  | 2.16103 | 2.0868  | 2.00705 | 2.18936 | 2.90077 | 1.96436 | 1.95628 | 2.02513 |
| chr17, mir-634  | 2.18202 | 2.00975 | 2.01807 | 1.99227 | 2.82714 | 2.01672 | 1.98849 | 1.98496 |
| chr17, mir-548c | 2.2427  | 2.05169 | 2.05135 | 2.12315 | 2.93899 | 2.03888 | 1.9891  | 1.99742 |
| chr17, mir-635  | 2.34034 | 2.02609 | 2.09701 | 1.99644 | 2.79965 | 2.0277  | 2.00011 | 1.89195 |
| chr17, mir-636  | 2.50204 | 2.06699 | 1.9777  | 1.87177 | 2.90035 | 2.10301 | 2.07035 | 1.7846  |
| chr17, mir-657, | 1.96976 | 1.88317 | 2.14756 | 2.14024 | 2.34902 | 2.06488 | 1.84854 | 2.03439 |
| chr18, mir-133a | 2.30576 | 2.02986 | 1.96868 | 1.69493 | 2.08201 | 1.86937 | 2.1209  | 1.58861 |
| chr18, mir-187  | 2.02696 | 1.88406 | 2.03449 | 1.85507 | 1.95507 | 1.90087 | 1.92377 | 1.93362 |
| chr18, mir-122a | 1.9821  | 1.9316  | 2.0678  | 1.9977  | 1.977   | 1.9826  | 1.8991  | 1.9278  |
| chr19, mir-637  | 2.09231 | 1.93205 | 2.12333 | 2.00385 | 1.99538 | 2.08333 | 1.94026 | 1.99564 |
| chr19, mir-7-3  | 2.1658  | 1.9688  | 2.1368  | 2.044   | 1.9468  | 2.0838  | 1.9336  | 2.0784  |
| chr19, mir-638  | 2.22489 | 2.00711 | 2.078   | 1.99667 | 1.99733 | 2.13511 | 2.02067 | 2.016   |
| chr19, mir-199a | 2.05196 | 1.96941 | 2.12176 | 2.07843 | 1.95804 | 2.11412 | 1.96431 | 2.05196 |
| chr19, mir-24-2 | 2.0575  | 1.98423 | 2.115   | 2.02827 | 1.99135 | 2.09577 | 1.99404 | 1.97154 |
| chr19, mir-181c | 1.93091 | 1.97473 | 2.14964 | 2.07109 | 1.93455 | 2.11855 | 1.94545 | 2.05    |
| chr19, mir-639  | 2.24747 | 1.97067 | 2.13307 | 2.0212  | 2.01467 | 2.10587 | 2.01213 | 1.99067 |
| chr19, mir-640  | 2.24019 | 2.06163 | 2.09769 | 1.87904 | 2.03173 | 2.11192 | 2.04798 | 2.68904 |

|                   |          |          |          |          |          |          |          |         |
|-------------------|----------|----------|----------|----------|----------|----------|----------|---------|
| chr19, mir-641    | 2.07327  | 1.95364  | 2.106    | 2.04818  | 1.96291  | 2.03636  | 1.94836  | 2.07273 |
| chr19, mir-330    | 2.15061  | 1.92857  | 2.12245  | 2.02918  | 1.93735  | 2.1002   | 2.00551  | 2.10163 |
| chr19, mir-642    | 2.15717  | 1.95717  | 2.13642  | 2.04038  | 2.01264  | 2.11774  | 1.98057  | 2.06774 |
| chr19, mir-769    | 2.02316  | 1.97263  | 2.13772  | 2.08105  | 1.97298  | 2.09018  | 1.96298  | 2.06281 |
| chr19, mir-150    | 2.11952  | 1.9573   | 2.03333  | 1.93095  | 2.01651  | 2.14524  | 2.0246   | 1.96698 |
| chr19, mir-99b,   | 1.99014  | 1.93686  | 2.11186  | 2.06571  | 1.93371  | 1.96557  | 1.86214  | 1.95071 |
| chr19, mir-643    | 2.09924  | 1.89886  | 1.97405  | 1.87582  | 2.02861  | 1.92848  | 1.83747  | 1.78899 |
| chr19, mir-512-   | 2.03536  | 1.9932   | 2.05757  | 2.15665  | 1.91985  | 1.97155  | 1.86448  | 2.07861 |
| chr20, mir-103-   | 2.25444  | 2.02205  | 1.97812  | 1.83367  | 2.05     | 1.98393  | 1.97829  | 2.44384 |
| chr20, mir-663    | 1.90654  | 1.895    | 1.87115  | 1.975    | 1.93077  | 1.81077  | 1.81346  | 2.36308 |
| chr20, mir-644    | 2.43463  | 2.06657  | 1.97315  | 1.90176  | 2.05917  | 1.98463  | 2.08713  | 1.82074 |
| chr20, mir-499    | 1.9716   | 1.95973  | 2.06853  | 2.1464   | 1.91947  | 2.0092   | 1.8812   | 1.94133 |
| chr20, mir-645    | 2.17888  | 1.95916  | 2.05112  | 2.00879  | 2.0028   | 2.04486  | 1.89561  | 1.91523 |
| chr20, mir-296    | 2.16305  | 1.94084  | 2.07     | 2.14505  | 1.91379  | 1.90726  | 1.96758  | 2.02547 |
| chr20, mir-646    | 1.91306  | 1.9349   | 1.97357  | 2.21184  | 1.84367  | 1.95908  | 1.70745  | 2.04092 |
| chr20, mir-1-1,   | 1.96141  | 1.94594  | 2.10547  | 2.18313  | 1.91422  | 2.03625  | 1.88641  | 2.02219 |
| chr20, mir-124a   | 1.87143  | 1.95554  | 2.10339  | 2.19286  | 1.86536  | 2.06804  | 1.86911  | 2.06554 |
| chr20, mir-647    | 2.01039  | 1.92039  | 2.09058  | 2.14808  | 1.98654  | 2.03462  | 1.93173  | 1.97077 |
| chr21, mir-99a,   | 2.00527  | 1.94264  | 1.84519  | 1.77341  | 1.89853  | 1.86488  | 1.79853  | 1.73992 |
| chr21, mir-125b   | 2.07611  | 1.93957  | 1.82944  | 1.79907  | 1.92735  | 1.88117  | 1.8366   | 1.74611 |
| chr21, mir-155    | 2.05359  | 1.89779  | 1.83379  | 1.48717  | 1.94255  | 1.93552  | 1.8611   | 1.47807 |
| chr21, mir-802    | 2.19637  | 2.00919  | 2.01121  | 1.97823  | 1.98081  | 2.00323  | 1.92629  | 2.00436 |
| chr22, mir-648    | 2.30581  | 2.00811  | 2.11811  | 1.97676  | 2.04689  | 2.07257  | 2.04311  | 1.76162 |
| chr22, mir-185    | 2.05743  | 1.95414  | 2.08814  | 2.064    | 1.96229  | 2.05357  | 1.929    | 2.06028 |
| chr22, DGCR8-     | 2.1083   | 2.03241  | 2.09     | 2.03661  | 2.01991  | 2.05143  | 2.00768  | 1.9992  |
| chr22, mir-649    | 1.93936  | 2.00894  | 2.0966   | 2.10447  | 1.99128  | 2.10425  | 1.91553  | 2.05702 |
| chr22, mir-130b   | 2.16965  | 1.98965  | 2.11439  | 2.01316  | 2.01649  | 2.06579  | 1.98246  | 1.99719 |
| chr22, mir-650    | 2.75423  | 0.370513 | 2.34744  | 0.685897 | 2.31551  | 2.27641  | 1.37256  | 2.23449 |
| chr22, PIWIL3     | 2.28029  | 2.05848  | 2.09834  | 2.10801  | 2.02265  | 2.00431  | 2.05398  | 2.07393 |
| chr22, mir-658,   | 2.23392  | 1.98354  | 2.12354  | 2.01392  | 1.99114  | 2.0981   | 2.00266  | 2.05025 |
| chr22, mir-33     | 2.24306  | 2.03111  | 2.0607   | 1.8307   | 2.00847  | 2.14903  | 1.98347  | 1.83833 |
| chr22, let-7a-3,  | 1.76137  | 1.9349   | 2.21078  | 2.09627  | 1.87941  | 2.06274  | 1.86431  | 1.62843 |
| chrX, mir-651     | 0.96728  | 0.92944  | 0.94704  | 1.46008  | 0.88848  | 1.67832  | 0.96696  | 1.65544 |
| chrX, mir-221,    | 0.978585 | 0.999622 | 0.844717 | 1.32792  | 0.929812 | 0.914529 | 0.867547 | 1.6734  |
| chrX, mir-532,    | 0.984737 | 0.962631 | 0.955965 | 1.34851  | 0.958597 | 0.946228 | 0.919737 | 1.63649 |
| chrX, mir-98, let | 0.998273 | 0.962159 | 0.96331  | 0.85633  | 0.955396 | 0.941439 | 0.942014 | 1.55842 |
| chrX, mir-223     | 1.02977  | 0.96375  | 0.96461  | 0.822969 | 0.913437 | 0.915938 | 0.977969 | 1.38266 |

|                 |          |          |          |          |          |          |          |         |
|-----------------|----------|----------|----------|----------|----------|----------|----------|---------|
| chrX, mir-421   | 0.97051  | 0.920816 | 0.953061 | 0.839694 | 0.961122 | 0.941225 | 0.891837 | 1.50602 |
| chrX, mir-545,  | 0.993903 | 0.919675 | 0.939106 | 0.821056 | 0.979187 | 0.907479 | 0.899757 | 1.51455 |
| chrX, mir-384   | 0.995    | 0.965178 | 0.971964 | 0.969821 | 0.941607 | 0.929821 | 0.911964 | 1.69107 |
| chrX, mir-325   | 1.00295  | 0.998182 | 0.970682 | 0.981818 | 0.955455 | 0.921591 | 0.895454 | 1.73705 |
| chrX, mir-361   | 0.974193 | 0.944193 | 0.892043 | 0.80742  | 0.968172 | 0.884086 | 0.896237 | 1.35452 |
| chrX, mir-652   | 1.07542  | 1.01402  | 0.99458  | 0.856262 | 0.97701  | 0.947103 | 0.930934 | 1.46065 |
| chrX, mir-448   | 0.95325  | 0.961875 | 0.931125 | 0.9275   | 1.00438  | 0.901125 | 0.889625 | 1.65025 |
| chrX, mir-766   | 1.03652  | 0.958587 | 0.991304 | 0.858044 | 0.961631 | 0.988044 | 0.971304 | 1.575   |
| chrX, mir-220   | 1.07927  | 0.971951 | 1.00439  | 0.929756 | 1.01146  | 0.967805 | 0.976829 | 1.65512 |
| chrX, mir-363,  | 1.00915  | 0.95523  | 0.935385 | 1.999    | 0.978307 | 0.911692 | 2.68377  | 1.72685 |
| chrX, mir-450-1 | 0.995606 | 0.93197  | 0.961212 | 1.85197  | 0.982121 | 0.913864 | 2.47356  | 1.6203  |
| chrX, mir-504   | 0.978077 | 0.936308 | 0.906923 | 2.02931  | 0.926769 | 0.884077 | 2.40862  | 1.61862 |
| chrX, mir-505   | 0.974395 | 0.902857 | 0.901099 | 1.67154  | 0.995934 | 0.882088 | 2.54593  | 1.29637 |
| chrX, mir-513-1 | 0.951494 | 0.907474 | 0.898195 | 2.0682   | 0.877474 | 0.888556 | 2.28051  | 1.66923 |
| chrX, FMR1      | 1.06766  | 0.925745 | 0.874645 | 1.76943  | 0.908546 | 0.891347 | 2.54351  | 1.46603 |
| chrX, mir-224,  | 0.914574 | 0.914574 | 0.96907  | 2.07721  | 0.896744 | 0.939535 | 1.99388  | 1.72264 |
| chrX, mir-105-1 | 0.980333 | 0.946777 | 0.950889 | 2.21833  | 0.934778 | 0.914111 | 2.30045  | 1.83633 |

| TUMOR ID        | DHL4    | DHL5    | DHL6    | DHL7    | DHL8    | DHL9    | Toledo  | USC-DHL-1 |
|-----------------|---------|---------|---------|---------|---------|---------|---------|-----------|
| MIRNA ID        |         |         |         |         |         |         |         |           |
| chr1, mir-200b, | 1.85302 | 1.85814 | 2.32279 | 1.45767 | 1.99767 | 2.26558 | 1.83279 | 2.04605   |
| chr1, mir-551a  | 1.6329  | 1.79484 | 2.03097 | 1.39581 | 1.99613 | 2.1971  | 1.80129 | 2.10097   |
| chr1, mir-34a   | 1.99427 | 2.13413 | 2.7836  | 2.03813 | 1.97867 | 2.29373 | 1.80533 | 1.96067   |
| chr1, mir-801   | 2.03714 | 2.36548 | 2.04143 | 2.18571 | 2.00976 | 2.16286 | 1.965   | 1.86952   |
| chr1, mir-552   | 1.88026 | 2.00545 | 2.01052 | 2.00377 | 1.94779 | 2.30221 | 1.70039 | 1.9639    |
| chr1, AGO4, A   | 2.10968 | 2.35445 | 2.06816 | 2.23614 | 1.98849 | 2.18503 | 1.98476 | 1.88083   |
| chr1, mir-30e,  | 2.02007 | 2.26287 | 2.04846 | 2.11221 | 1.94846 | 2.17037 | 1.81434 | 1.70802   |
| chr1, mir-101-1 | 1.84294 | 2.23492 | 1.96508 | 2.13841 | 1.95087 | 1.84373 | 1.86778 | 1.77397   |
| chr1, SERBP1    | 2.08446 | 2.15049 | 2.03625 | 2.20587 | 1.96902 | 1.48598 | 1.83451 | 1.6037    |
| chr1, mir-186   | 1.99201 | 2.18987 | 2.05087 | 2.22309 | 1.91295 | 1.45564 | 1.81121 | 1.59879   |
| chr1, mir-137   | 2.24977 | 2.07699 | 2.055   | 2.06216 | 2.03057 | 1.79977 | 1.94011 | 1.83494   |
| chr1, mir-553   | 2.11    | 2.31672 | 2.05256 | 2.14968 | 1.9548  | 1.95448 | 1.95016 | 1.8164    |
| chr1, mir-197   | 2.12638 | 2.27085 | 2.05227 | 2.16809 | 2.00489 | 2.1539  | 1.96206 | 1.76972   |
| chr1, DDX20     | 2.12843 | 2.19205 | 2.0347  | 2.05978 | 1.93962 | 2.03535 | 1.78903 | 1.87687   |
| chr1, mir-554   | 1.90441 | 2.12476 | 1.95107 | 2.05107 | 2.67083 | 2.18    | 3.13393 | 1.87119   |
| chr1, mir-92b   | 1.86509 | 1.97759 | 1.91417 | 1.87639 | 2.49537 | 2.14944 | 2.77611 | 1.865     |

|                  |         |         |         |         |         |          |          |         |
|------------------|---------|---------|---------|---------|---------|----------|----------|---------|
| chr1, mir-555    | 2.01741 | 2.27553 | 1.965   | 2.08848 | 2.80777 | 2.15366  | 3.62268  | 1.82946 |
| chr1, mir-9-1    | 1.9374  | 2.12331 | 1.91071 | 1.99732 | 2.6763  | 2.23779  | 3.20543  | 1.85055 |
| chr1, mir-765    | 1.86577 | 1.97189 | 1.92072 | 1.92694 | 2.58342 | 2.18162  | 2.9491   | 1.95991 |
| chr1, mir-556    | 1.82248 | 2.01    | 1.92117 | 1.96759 | 2.67547 | 2.08847  | 3.15453  | 1.86642 |
| chr1, mir-557    | 1.88654 | 2.02811 | 1.93409 | 2.01748 | 2.63504 | 2.06433  | 3.20858  | 1.91205 |
| chr1, mir-214, l | 1.90482 | 2.10969 | 1.93046 | 2.0061  | 2.62928 | 1.7461   | 3.27595  | 1.76672 |
| chr1, mir-488    | 1.99326 | 1.87043 | 1.8795  | 1.95645 | 2.51851 | 1.78482  | 3.31007  | 1.89851 |
| chr1, mir-181b-  | 2.18128 | 2.2975  | 2.00987 | 2.16446 | 1.95784 | 1.51953  | 3.90892  | 1.47216 |
| chr1, mir-135b   | 1.89367 | 2.02245 | 1.92337 | 1.89449 | 1.84031 | 2.1348   | 3.05133  | 1.82684 |
| chr1, mir-29c, l | 1.96137 | 1.97925 | 1.9185  | 1.97262 | 1.85906 | 1.78631  | 3.038    | 1.646   |
| chr1, mir-205    | 1.80844 | 1.79055 | 1.88872 | 1.93184 | 1.72073 | 1.8089   | 2.94193  | 1.78339 |
| chr1, mir-215, l | 2.12131 | 2.13352 | 1.99369 | 2.15221 | 1.79279 | 1.49803  | 3.505    | 1.5673  |
| chr2, mir-558    | 2.13182 | 2.351   | 2.06118 | 3.24073 | 1.88445 | 1.79855  | 1.95218  | 1.74627 |
| chr2, mir-559    | 2.08883 | 2.28404 | 2.00468 | 3.1167  | 1.94426 | 2.16936  | 1.93202  | 1.97138 |
| chr2, mir-217, l | 1.90888 | 2.18612 | 1.97351 | 3.11418 | 1.95119 | 2.1006   | 1.76224  | 1.89694 |
| chr2, mir-560    | 1.86333 | 2.01667 | 1.7     | 1.84889 | 1.87222 | 1.90222  | 1.73889  | 1.73556 |
| chr2, mir-128a   | 2.19406 | 2.4318  | 2.12376 | 2.24767 | 2.02075 | 2.10256  | 2.01872  | 1.82045 |
| chr2, mir-10b    | 1.86471 | 1.98672 | 1.72387 | 3.77454 | 1.93286 | 2.22042  | 1.69975  | 1.89857 |
| chr2, mir-561    | 1.90734 | 1.97489 | 2.12698 | 4.12892 | 1.88115 | 1.8095   | 0.977626 | 1.76475 |
| chr2, mir-26b    | 1.92915 | 2.02763 | 1.99068 | 1.89186 | 1.9422  | 2.15763  | 1.75814  | 1.96051 |
| chr2, mir-375    | 1.90613 | 1.98656 | 2.00247 | 1.89376 | 1.94064 | 2.32817  | 1.68946  | 2.00849 |
| chr2, mir-153-1  | 1.96513 | 2.01205 | 1.99436 | 1.9241  | 1.92256 | 2.20961  | 1.74628  | 1.92897 |
| chr2, mir-562    | 2.0585  | 2.2175  | 2.07033 | 2.13983 | 2.00533 | 2.21933  | 1.9225   | 1.88167 |
| chr2, mir-149    | 1.8825  | 1.9335  | 2.046   | 1.9305  | 2.05025 | 2.1415   | 1.78475  | 1.97175 |
| chr3, mir-563    | 2.01222 | 2.77762 | 2.00429 | 2.13635 | 1.94873 | 1.89064  | 1.83397  | 1.87127 |
| chr3, mir-128b   | 2.13591 | 2.63732 | 2.05835 | 2.12768 | 1.83976 | 1.9325   | 2.63085  | 1.81713 |
| chr3, mir-26a-1  | 2.0329  | 2.62032 | 1.97726 | 2.09242 | 1.83677 | 1.98565  | 2.50653  | 1.8996  |
| chr3, mir-138-1  | 2.05079 | 2.50667 | 1.99754 | 2.03587 | 1.79897 | 2.02508  | 1.65738  | 1.76532 |
| chr3, mir-564    | 1.95033 | 2.57957 | 2.01728 | 2.16076 | 1.88467 | 1.94739  | 1.74924  | 1.84804 |
| chr3, mir-565    | 2.04153 | 2.68597 | 2.05871 | 2.15242 | 1.99742 | 1.91371  | 1.93395  | 1.64766 |
| chr3, mir-425, l | 1.96131 | 2.19091 | 2.00485 | 2.05374 | 1.98222 | 1.90636  | 1.82101  | 1.83222 |
| chr3, mir-566    | 2.0139  | 2.09932 | 2.05119 | 2.05508 | 1.98119 | 2.31068  | 1.87509  | 2.03237 |
| chr3, let-7g, mi | 2.03635 | 2.20343 | 1.99718 | 2.07862 | 2.00199 | 2.06735  | 1.93387  | 1.86696 |
| chr3, mir-567    | 1.11905 | 2.16321 | 2.06745 | 2.05372 | 1.93248 | 1.37504  | 1.87723  | 1.43496 |
| chr3, mir-568    | 1.06892 | 2.15516 | 2.02299 | 2.10892 | 1.93057 | 2.05987  | 1.82363  | 1.71165 |
| chr3, mir-198    | 1.958   | 2.00376 | 1.998   | 2.03184 | 1.88664 | 2.02792  | 1.71488  | 1.81264 |
| chr3, mir-15b, l | 2.96448 | 2.26766 | 2.02299 | 2.11864 | 1.83409 | 0.539416 | 1.81792  | 1.28552 |

|                 |         |         |         |         |         |         |         |         |
|-----------------|---------|---------|---------|---------|---------|---------|---------|---------|
| chr3, mir-551b  | 2.90709 | 2.08592 | 2.01223 | 2.08699 | 1.87233 | 1.9065  | 1.77884 | 1.85194 |
| chr3, mir-569   | 2.71978 | 2.00682 | 1.9697  | 2.00504 | 1.85541 | 2.03852 | 1.69148 | 1.88089 |
| chr3, mir-28    | 4.02106 | 2.25426 | 2.04349 | 4.24959 | 1.89059 | 1.9313  | 1.87118 | 1.64402 |
| chr3, mir-570   | 3.27553 | 1.705   | 2.21684 | 4.40974 | 1.89026 | 2.28421 | 1.21947 | 1.93158 |
| chr4, mir-571   | 2.04059 | 2.45235 | 2.09118 | 2.16471 | 2.07235 | 2.11882 | 1.84353 | 1.79176 |
| chr4, mir-95    | 1.891   | 1.991   | 1.959   | 1.97614 | 1.95243 | 2.13028 | 1.958   | 1.639   |
| chr4, mir-572   | 1.84797 | 1.86013 | 1.91949 | 2.01532 | 1.75696 | 1.82279 | 1.82342 | 1.62481 |
| chr4, mir-218-1 | 2.00045 | 2.38219 | 2.03013 | 2.19161 | 1.76994 | 1.78393 | 1.85548 | 1.62116 |
| chr4, mir-573   | 2.07669 | 2.10693 | 2.09283 | 2.08205 | 1.9285  | 1.55535 | 1.77465 | 1.41221 |
| chr4, mir-574   | 2.13818 | 2.36889 | 2.03859 | 2.17697 | 1.93818 | 2.07727 | 1.90646 | 1.54071 |
| chr4, mir-575   | 2.03757 | 2.22728 | 1.17738 | 2.05048 | 1.97214 | 2.04767 | 2.00185 | 1.72058 |
| chr4, mir-576   | 2.1975  | 2.29603 | 1.1419  | 2.16543 | 1.92009 | 1.65948 | 2.01026 | 1.40957 |
| chr4, mir-367,  | 2.11735 | 2.34386 | 1.11553 | 2.20508 | 1.96841 | 1.91318 | 2.11939 | 1.5072  |
| chr4, mir-577   | 2.06663 | 2.10566 | 1.10054 | 2.1262  | 1.9453  | 1.68777 | 2.06837 | 1.48886 |
| chr4, mir-578   | 2.07897 | 2.23079 | 2.05976 | 2.16095 | 1.85579 | 1.63548 | 1.94309 | 1.54667 |
| chr5, Droscha   | 1.8673  | 2.09284 | 1.931   | 2.02402 | 1.81196 | 1.83683 | 2.47003 | 1.75438 |
| chr5, mir-579   | 2.06102 | 2.30177 | 1.93463 | 2.11313 | 1.79388 | 1.74293 | 2.86068 | 1.66857 |
| chr5, mir-580   | 1.9944  | 2.00944 | 1.95776 | 2.04704 | 1.9028  | 1.70448 | 2.64256 | 1.50608 |
| chr5, mir-581   | 1.89769 | 2.08657 | 2.00552 | 2.05866 | 1.84052 | 1.72664 | 2.58022 | 1.70403 |
| chr5, mir-449,  | 1.97268 | 2.06485 | 2.00174 | 2.0292  | 1.83515 | 1.86254 | 2.61333 | 1.83261 |
| chr5, mir-582   | 1.93525 | 2.0325  | 1.92425 | 2.1245  | 1.95233 | 1.80967 | 2.73783 | 1.73542 |
| chr5, mir-9-2   | 2.07162 | 2.1045  | 1.9575  | 1.99431 | 1.84037 | 1.80219 | 1.78319 | 1.37119 |
| chr5, mir-583   | 1.96947 | 2.18241 | 1.9906  | 1.12008 | 1.90316 | 2.05857 | 1.76797 | 1.8721  |
| chr5, mir-584   | 1.96831 | 2.05627 | 1.93964 | 1.97663 | 1.82747 | 2.0559  | 1.6253  | 1.95313 |
| chr5, mir-143,  | 1.97475 | 2.04941 | 1.92248 | 1.92139 | 1.8203  | 2.08267 | 1.66248 | 1.88347 |
| chr5, mir-378   | 2.01301 | 2.1112  | 1.97711 | 2.01229 | 1.85892 | 2.07121 | 1.75711 | 1.87361 |
| chr5, mir-146a  | 1.99707 | 2.0703  | 1.98141 | 2.00212 | 1.85374 | 1.71152 | 1.88141 | 1.58636 |
| chr5, mir-103-1 | 1.98356 | 2.05598 | 1.95129 | 2.10962 | 1.72674 | 1.46023 | 1.71341 | 1.69689 |
| chr5, mir-218-2 | 1.87701 | 1.89364 | 1.94589 | 1.98897 | 1.75252 | 1.92449 | 1.64804 | 1.91112 |
| chr5, mir-585   | 1.937   | 1.95427 | 1.93955 | 1.98682 | 1.78827 | 1.97846 | 1.64536 | 1.93245 |
| chr5, mir-340   | 1.99183 | 2.21183 | 1.94462 | 2.07193 | 1.86258 | 2.17161 | 1.78495 | 1.85032 |
| chr6, mir-548a- | 2.07374 | 1.41699 | 2.81829 | 2.06886 | 1.87496 | 1.87463 | 1.87789 | 1.90618 |
| chr6, mir-219-1 | 1.90247 | 2.01856 | 3.29165 | 1.89227 | 1.93639 | 2.14165 | 1.72588 | 1.88392 |
| chr6, XPO5      | 2.00205 | 2.2267  | 3.65272 | 2.08804 | 3.52244 | 2.81333 | 1.81933 | 1.87055 |
| chr6, mir-586   | 1.94328 | 2.17629 | 3.955   | 2.11905 | 3.75991 | 2.45716 | 1.7825  | 1.88155 |
| chr6, mir-206,  | 1.92978 | 2.22194 | 3.71281 | 1.99086 | 3.44158 | 2.77863 | 1.74446 | 1.87835 |
| chr6, mir-30c-2 | 2.04659 | 2.06064 | 2.07943 | 2.11572 | 2.99935 | 1.91083 | 1.04538 | 1.78261 |

|                 |         |         |         |         |         |         |         |         |
|-----------------|---------|---------|---------|---------|---------|---------|---------|---------|
| chr6, mir-587   | 2.05109 | 1.30036 | 2.07718 | 2.087   | 3.72618 | 3.18827 | 1.94191 | 1.93018 |
| chr6, mir-548b  | 2.09089 | 1.2608  | 2.03584 | 2.16469 | 3.88257 | 3.27947 | 1.8738  | 1.79558 |
| chr6, mir-588   | 2.20721 | 1.28738 | 2.2059  | 2.24721 | 3.99574 | 3.05082 | 1.95656 | 1.97574 |
| chr6, mir-548a- | 2.1048  | 1.32087 | 2.03079 | 2.16181 | 4.01575 | 3.43283 | 2.1485  | 1.91685 |
| chr7, mir-339   | 2.24868 | 1.70579 | 2.35053 | 1.78158 | 2.47211 | 2.12921 | 2.05474 | 1.90447 |
| chr7, mir-589   | 2.48431 | 1.77588 | 2.5102  | 1.78137 | 2.4849  | 2.11784 | 2.27    | 1.89608 |
| chr7, mir-148a  | 2.69885 | 2.09844 | 2.71802 | 1.97719 | 2.56    | 2.02135 | 2.49625 | 1.70396 |
| chr7, mir-196b  | 2.61771 | 1.9224  | 2.70646 | 1.8851  | 2.44042 | 1.98281 | 2.3474  | 1.82323 |
| chr7, mir-550-1 | 3.0158  | 2.22457 | 2.85506 | 2.09407 | 2.6084  | 1.64753 | 2.6063  | 1.57617 |
| chr7, has-mir-5 | 2.89000 | 2.18000 | 2.77000 | 2.10000 | 2.63000 | 1.64000 | 2.69000 | 1.64000 |
| chr7, mir-590   | 2.71925 | 2.18677 | 2.67699 | 2.05495 | 2.59968 | 2.44968 | 2.67011 | 2.61495 |
| chr7, mir-653,  | 2.72969 | 1.94369 | 2.77938 | 1.96619 | 2.57775 | 2.58844 | 2.42325 | 2.76588 |
| chr7, mir-591   | 2.5568  | 1.798   | 2.67344 | 1.94736 | 2.38792 | 2.13416 | 2.41872 | 2.33992 |
| chr7, mir-25, m | 2.45106 | 1.97407 | 2.48867 | 1.78487 | 2.49637 | 2.44009 | 2.26779 | 2.60681 |
| chr7, mir-592   | 2.73654 | 1.93077 | 1.90223 | 1.98408 | 2.61023 | 2.82469 | 2.39992 | 3.03115 |
| chr7, SDN1, m   | 2.845   | 2.04999 | 1.94004 | 2.04665 | 2.62989 | 2.7964  | 2.43365 | 2.64167 |
| chr7, mir-129-1 | 2.63405 | 1.99933 | 1.92461 | 1.94517 | 2.50022 | 2.81382 | 2.33438 | 2.79955 |
| chr7, mir-182,  | 2.45596 | 1.94848 | 1.90323 | 1.89717 | 2.41364 | 2.68667 | 2.29646 | 2.73566 |
| chr7, mir-335   | 2.73469 | 2.00656 | 1.95063 | 1.96609 | 2.60641 | 2.82406 | 2.42851 | 2.93453 |
| chr7, mir-29a,  | 2.76368 | 2.11137 | 1.97926 | 1.99442 | 2.62074 | 2.52042 | 2.47337 | 2.53347 |
| chr7, mir-490   | 2.56805 | 1.94195 | 1.88278 | 2.01118 | 2.52426 | 2.55272 | 2.43947 | 2.76343 |
| chr7, has-mir-5 | 2.62452 | 2.03107 | 1.91143 | 1.96179 | 2.54369 | 2.18321 | 2.54571 | 2.46048 |
| chr7, mir-671   | 2.40231 | 1.89538 | 1.8824  | 1.87385 | 2.40288 | 2.57087 | 2.30308 | 2.50433 |
| chr7, mir-153-2 | 2.67651 | 1.93198 | 1.87593 | 1.99198 | 2.47105 | 2.86058 | 2.29419 | 2.90767 |
| chr7, mir-595   | 2.55321 | 1.86605 | 1.85728 | 1.87432 | 2.37975 | 2.62457 | 2.22012 | 2.66506 |
| chr8, mir-596   | 3.0642  | 1.92478 | 1.14406 | 2.10058 | 1.7529  | 1.80855 | 1.78275 | 1.30681 |
| chr8, mir-597   | 3.10986 | 2.28855 | 1.15103 | 2.18435 | 1.9051  | 1.828   | 1.88717 | 1.59007 |
| chr8, mir-124a- | 2.7217  | 2.03313 | 1.19437 | 2.00929 | 1.84205 | 2.14027 | 1.6983  | 1.99929 |
| chr8, mir-598   | 2.72908 | 2.01862 | 1.22943 | 1.98207 | 1.95184 | 1.98655 | 1.68506 | 1.93885 |
| chr8, mir-383   | 2.75673 | 1.94336 | 1.08309 | 2.10609 | 1.76745 | 1.79382 | 1.78373 | 1.83809 |
| chr8, mir-320,  | 2.93625 | 2.22863 | 1.17506 | 2.13831 | 1.93009 | 2.22131 | 1.90186 | 1.97314 |
| chr8, mir-486   | 2.62047 | 1.866   | 2.618   | 1.84788 | 1.91459 | 2.03082 | 1.73459 | 1.86071 |
| chr8, mir-124a- | 2.87141 | 1.96128 | 2.89917 | 2.0518  | 1.81955 | 2.00096 | 1.7366  | 1.87013 |
| chr8, mir-599   | 1.9753  | 2.1847  | 3.04644 | 2.25067 | 1.9751  | 2.00752 | 2.9045  | 1.75872 |
| chr8, mir-548a- | 1.94762 | 2.03443 | 2.92967 | 2.13689 | 1.96459 | 2.0682  | 2.55066 | 1.77123 |
| chr8, mir-548d- | 2.05149 | 2.25799 | 2.88306 | 2.09321 | 1.9547  | 1.68142 | 2.75    | 2.09903 |
| chr8, mir-30b,  | 2.02454 | 2.07967 | 1.92487 | 2.01217 | 1.73322 | 1.5571  | 3.98947 | 1.62908 |



|                   |         |         |         |         |         |         |         |          |
|-------------------|---------|---------|---------|---------|---------|---------|---------|----------|
| chr8, AGO2        | 2.0259  | 2.10191 | 1.95176 | 2.01173 | 1.87022 | 1.99074 | 3.79068 | 1.85123  |
| chr8, mir-151     | 2.07183 | 2.26183 | 1.96825 | 2.117   | 1.899   | 2.10158 | 4.06    | 1.78767  |
| chr8, mir-661     | 1.78216 | 1.7727  | 1.92838 | 1.78081 | 1.91865 | 2.18162 | 2.71676 | 1.95703  |
| chr9, mir-101-2   | 2.1055  | 2.17483 | 2.89602 | 2.10622 | 1.91046 | 1.90914 | 1.85483 | 1.85695  |
| chr9, mir-491     | 1.97694 | 2.30231 | 2.99664 | 2.21261 | 1.98933 | 1.81821 | 1.91291 | 1.79463  |
| chr9, mir-31      | 2.12839 | 2.20678 | 3.04924 | 2.17373 | 2.02991 | 1.98839 | 1.89449 | 2.00593  |
| chr9, mir-204     | 1.93328 | 2.00329 | 1.96949 | 2.04584 | 1.80394 | 1.9638  | 1.7208  | 1.84891  |
| chr9, mir-7-1     | 1.99433 | 2.27767 | 2.025   | 2.02542 | 1.86842 | 1.2285  | 1.81042 | 1.3755   |
| chr9, let-7a-1, 1 | 1.94959 | 2.19629 | 2.00412 | 2.1001  | 1.90217 | 1.57505 | 1.96031 | 1.64804  |
| chr9, mir-23b, 1  | 1.86857 | 2.04114 | 1.97743 | 1.94619 | 1.83286 | 1.9921  | 1.7739  | 1.89324  |
| chr9, mir-32      | 1.96734 | 2.0443  | 2.00367 | 2.05055 | 1.90102 | 1.76547 | 1.86313 | 1.7068   |
| chr9, mir-455     | 1.87019 | 1.9401  | 1.94257 | 1.90686 | 1.89133 | 2.1119  | 1.67762 | 1.97467  |
| chr9, mir-147     | 1.9324  | 2.11833 | 1.95271 | 2.05479 | 1.92719 | 2.23292 | 1.69792 | 1.97562  |
| chr9, mir-600     | 2.0162  | 2.22088 | 1.97431 | 2.09153 | 1.93445 | 1.94854 | 1.93    | 1.69474  |
| chr9, mir-601     | 1.925   | 2.0374  | 1.94802 | 1.96219 | 1.92052 | 2.23677 | 1.83583 | 1.95302  |
| chr9, mir-181a-1  | 1.97086 | 2.25345 | 1.98181 | 2.14353 | 1.91267 | 2.17595 | 1.8925  | 1.90578  |
| chr9, mir-199b    | 1.88818 | 2.03182 | 1.95127 | 1.92418 | 1.92527 | 2.272   | 1.81745 | 1.95836  |
| chr9, mir-219-2   | 1.8729  | 2.02237 | 1.91684 | 1.92566 | 1.89066 | 2.28921 | 1.76474 | 1.96447  |
| chr9, mir-126     | 1.80333 | 1.6763  | 1.93889 | 1.7363  | 1.99148 | 2.17333 | 1.70889 | 2.0237   |
| chr9, mir-602     | 1.89105 | 1.86395 | 1.94763 | 1.94263 | 1.94368 | 2.3029  | 1.77526 | 2.29684  |
| chr10, mir-511-1  | 1.765   | 2.01    | 1.89    | 2.66    | 1.74    | 1.905   | 1.65    | 1.84     |
| chr10, mir-603    | 1.81364 | 2.05595 | 1.92595 | 2.94413 | 1.7195  | 1.82083 | 1.63132 | 1.72281  |
| chr10, mir-604    | 1.86904 | 2.07607 | 1.94978 | 3.00141 | 1.78215 | 1.93696 | 1.61037 | 1.98378  |
| chr10, mir-605    | 1.92197 | 2.02898 | 2.05526 | 3.15613 | 1.84219 | 1.9808  | 1.74372 | 1.93409  |
| chr10, mir-606    | 1.97677 | 2.13333 | 2.01677 | 3.04774 | 1.93258 | 2.26634 | 1.76376 | 2.0114   |
| chr10, mir-346    | 1.98932 | 2.08892 | 1.99919 | 2.77108 | 1.88257 | 2.07892 | 1.78959 | 1.42297  |
| chr10, mir-107    | 2.12404 | 2.11351 | 2.01132 | 3.15298 | 1.95719 | 2.09298 | 1.86746 | 1.21377  |
| chr10, mir-607    | 2.10175 | 2.29515 | 2.00577 | 3.18196 | 1.82124 | 2.0368  | 2.01268 | 0.693196 |
| chr10, mir-608    | 2.01223 | 2.14083 | 1.9805  | 2.90901 | 1.94116 | 2.08182 | 1.77364 | 1.87463  |
| chr10, mir-146b   | 1.92903 | 2.0779  | 1.99419 | 2.6671  | 1.96661 | 2.1871  | 1.79694 | 1.95081  |
| chr10, mir-609    | 2.05965 | 2.18088 | 1.98044 | 3.14699 | 1.93779 | 2.09761 | 1.80274 | 1.93142  |
| chr10, mir-202    | 1.91878 | 1.91756 | 1.94073 | 2.41707 | 1.94659 | 2.20219 | 1.80024 | 1.95317  |
| chr11, mir-210    | 1.95318 | 2.06545 | 2.49682 | 1.94159 | 1.96591 | 2.18364 | 2.32545 | 1.97932  |
| chr11, mir-483    | 1.92652 | 1.91879 | 2.72379 | 1.91954 | 1.98349 | 2.27454 | 2.52409 | 1.93879  |
| chr11, mir-610    | 1.94892 | 2.12446 | 2.00698 | 2.1377  | 1.81755 | 1.51094 | 2.62935 | 1.59187  |
| chr11, mir-129-1  | 2.06196 | 2.13972 | 1.97126 | 2.04434 | 1.78371 | 1.95105 | 2.4737  | 1.86986  |
| chr11, mir-130a   | 1.98678 | 2.21552 | 1.98644 | 2.04402 | 1.8669  | 1.94046 | 2.50563 | 1.82609  |

|                  |         |         |         |         |         |         |         |         |
|------------------|---------|---------|---------|---------|---------|---------|---------|---------|
| chr11, mir-611   | 1.94513 | 2.03675 | 2.01359 | 1.99188 | 1.95624 | 2.0294  | 2.39974 | 1.82547 |
| chr11, mir-192,  | 1.94052 | 2.05328 | 1.97879 | 1.94034 | 1.99362 | 2.10052 | 2.40621 | 1.92845 |
| chr11, mir-612   | 2.06091 | 2.21883 | 2.01532 | 2.08299 | 2.00636 | 1.45961 | 2.84546 | 1.44792 |
| chr11, MALAT1    | 2.07847 | 2.33694 | 2.03082 | 2.15378 | 2.01827 | 1.42429 | 2.85857 | 1.39735 |
| chr11, mir-139   | 1.86096 | 1.94012 | 1.94494 | 1.87193 | 1.93904 | 2.16904 | 2.30109 | 1.89072 |
| chr11, mir-326   | 1.88639 | 1.93125 | 1.95445 | 1.87167 | 1.89931 | 2.11569 | 2.24833 | 1.88417 |
| chr11, PIWIL4    | 1.94278 | 1.99308 | 1.95407 | 3.02458 | 1.8681  | 1.97773 | 2.74857 | 1.81519 |
| chr11, mir-34b,  | 2.08171 | 2.28123 | 1.9676  | 3.14589 | 1.87308 | 2.05288 | 1.97329 | 1.91644 |
| chr11, mir-125b  | 1.92321 | 1.14321 | 2.02869 | 3.07357 | 1.9347  | 2.2097  | 1.79708 | 2.02655 |
| chr11, let-7a-2, | 1.90473 | 1.13154 | 1.98989 | 3.06363 | 1.9122  | 2.18269 | 1.81055 | 2.01648 |
| chr12, mir-200c  | 2.69327 | 2.94383 | 1.96271 | 1.97047 | 2.63206 | 2.64804 | 1.95393 | 1.81103 |
| chr12, mir-613   | 2.84025 | 3.11568 | 1.05259 | 2.00148 | 2.64358 | 2.42198 | 2.00691 | 1.70123 |
| chr12, mir-614   | 2.61623 | 2.87746 | 1.13965 | 1.93421 | 2.56421 | 2.83088 | 1.90684 | 1.82544 |
| chr12, mir-196a  | 2.51112 | 1.9886  | 1.9129  | 2.53458 | 2.54374 | 3.01654 | 2.31664 | 1.90299 |
| chr12, mir-615   | 2.57402 | 1.99811 | 1.86623 | 2.60377 | 2.55361 | 3.08213 | 2.37262 | 1.8559  |
| chr12, mir-148b  | 2.77051 | 2.12483 | 1.90093 | 2.70305 | 2.61898 | 2.90576 | 2.57873 | 1.80975 |
| chr12, mir-616   | 2.66849 | 2.1505  | 1.92677 | 2.66273 | 2.57849 | 2.42424 | 2.45    | 1.67434 |
| chr12, mir-26a-  | 2.65017 | 2.09965 | 1.91383 | 2.65078 | 2.52417 | 2.79513 | 2.53817 | 1.80539 |
| chr12, let-7i    | 2.85877 | 2.01938 | 1.92568 | 2.79963 | 1.84265 | 2.26759 | 2.8329  | 1.44148 |
| chr12, mir-548c  | 2.86117 | 2.08125 | 1.95825 | 2.81433 | 1.80558 | 2.3965  | 2.69375 | 1.3575  |
| chr12, mir-617   | 2.72124 | 2.05752 | 1.9319  | 2.03591 | 1.81168 | 2.54825 | 1.67197 | 1.63022 |
| chr12, mir-618   | 2.67448 | 2.00117 | 1.92765 | 2.05021 | 1.8209  | 2.49048 | 1.67331 | 1.69469 |
| chr12, mir-492   | 2.75853 | 2.10676 | 1.95132 | 1.94029 | 1.85279 | 2.63441 | 1.74103 | 1.87073 |
| chr12, mir-331   | 3.07504 | 2.38153 | 2.00397 | 2.07786 | 1.8355  | 2.60718 | 1.82679 | 1.63565 |
| chr12, mir-135a  | 1.89613 | 1.96793 | 1.92533 | 2.03427 | 1.8194  | 2.7434  | 1.74787 | 1.873   |
| chr12, mir-619   | 1.98655 | 2.06388 | 1.95198 | 1.94276 | 1.84466 | 2.86621 | 1.78043 | 1.75147 |
| chr12, mir-620   | 1.90215 | 2.12    | 1.96148 | 1.99651 | 1.90114 | 2.41812 | 1.83356 | 1.76127 |
| chr12, PIWIL1    | 1.84235 | 1.90101 | 1.93563 | 2.03492 | 1.75504 | 2.60084 | 1.77929 | 1.89878 |
| chr12, RAN       | 2.01449 | 1.95564 | 1.95103 | 1.99987 | 1.82231 | 2.19731 | 1.90718 | 1.73115 |
| chr13, mir-621   | 2.88339 | 2.2271  | 2.88661 | 1.21048 | 2.68597 | 2.56468 | 1.8621  | 1.61064 |
| chr13, mir-16-1  | 3.21727 | 2.4481  | 3.29967 | 1.19554 | 2.97669 | 0.76    | 2.17893 | 1.17132 |
| chr13, mir-622   | 2.62946 | 1.89198 | 3.26135 | 2.06883 | 2.47243 | 1.77198 | 1.77342 | 1.35919 |
| chr13, mir-17,   | 2.82767 | 2.86511 | 3.25504 | 2.45587 | 2.41549 | 1.41429 | 1.6991  | 1.10617 |
| chr13, mir-623   | 2.89081 | 2.14848 | 2.75101 | 1.16141 | 2.79263 | 2.17646 | 1.93939 | 1.40606 |
| chr14, mir-208   | 1.93229 | 2.05321 | 1.98349 | 1.98771 | 1.95881 | 2.29385 | 1.75413 | 1.96174 |
| chr14, mir-624   | 2.1025  | 2.31524 | 2.0756  | 2.1575  | 1.99571 | 1.96857 | 1.89679 | 1.5869  |
| chr14, mir-625   | 2.20379 | 2.36287 | 2.05793 | 2.23414 | 1.89012 | 1.84207 | 1.85965 | 1.64931 |

|                 |         |         |         |         |         |         |         |         |
|-----------------|---------|---------|---------|---------|---------|---------|---------|---------|
| chr14, Dicer1   | 2.02148 | 2.13005 | 2.02889 | 2.953   | 1.98753 | 2.00048 | 1.94768 | 1.70702 |
| chr14, mir-342  | 2.00208 | 2.10635 | 1.98135 | 2.72396 | 1.9576  | 2.15375 | 3.09667 | 1.82292 |
| chr14, mir-345  | 1.94556 | 1.92648 | 1.98796 | 2.45704 | 1.93963 | 2.11204 | 2.81556 | 1.90352 |
| chr14, mir-770, | 1.86594 | 2.01302 | 1.98158 | 2.72936 | 1.98611 | 2.32618 | 3.09822 | 1.96151 |
| chr14, mir-379, | 1.86687 | 1.99935 | 1.99165 | 2.74621 | 1.96131 | 2.3123  | 3.076   | 1.9943  |
| chr14, mir-203  | 1.85735 | 1.81029 | 1.97471 | 2.23412 | 1.92294 | 2.20235 | 2.55412 | 2.04235 |
| chr15, mir-211  | 2.00939 | 2.18684 | 2.03745 | 2.05408 | 1.94867 | 2.21531 | 1.90837 | 1.94102 |
| chr15, mir-626  | 2.17224 | 2.44118 | 2.12671 | 2.28788 | 2.07729 | 2.00059 | 2.12165 | 1.82894 |
| chr15, mir-627  | 2.08418 | 2.31826 | 2.08194 | 2.21633 | 2.0602  | 2.30326 | 1.94163 | 1.90959 |
| chr15, mir-628  | 2.1147  | 2.45894 | 2.15227 | 2.20265 | 1.89644 | 1.83765 | 1.85803 | 1.6103  |
| chr15, mir-190  | 1.93919 | 2.07793 | 2.01667 | 2.07622 | 1.92163 | 2.19289 | 1.72755 | 1.9957  |
| chr15, mir-422a | 2.02756 | 2.13578 | 1.98944 | 2.053   | 1.94656 | 2.15667 | 1.81389 | 1.90122 |
| chr15, mir-629  | 2.09032 | 1.93392 | 1.9724  | 1.97984 | 1.76176 | 1.92736 | 1.71904 | 1.84904 |
| chr15, mir-630  | 2.07791 | 2.27513 | 2.07296 | 1.20826 | 1.88035 | 1.93939 | 1.89409 | 1.82087 |
| chr15, mir-631  | 1.95456 | 2.04506 | 1.98582 | 1.25316 | 1.93291 | 2.1062  | 1.20013 | 1.90886 |
| chr15, mir-184  | 1.91062 | 2.1325  | 1.94322 | 1.16687 | 1.85589 | 2.12714 | 1.72188 | 1.99482 |
| chr15, mir-549  | 1.91054 | 1.99784 | 2.00441 | 1.11531 | 1.89811 | 1.94414 | 1.81721 | 1.92261 |
| chr15, mir-7-2  | 2.03476 | 2.10524 | 1.99833 | 1.16202 | 1.91548 | 2.07095 | 1.77405 | 1.78988 |
| chr15, mir-9-3  | 1.93306 | 2.11847 | 2.01888 | 1.21194 | 1.92775 | 2.28112 | 1.80071 | 1.88796 |
| chr16, mir-662  | 1.82538 | 1.87846 | 1.97923 | 1.89038 | 1.94538 | 2.15308 | 1.815   | 1.98423 |
| chr16, mir-193b | 2.03076 | 2.18967 | 1.99902 | 2.01706 | 1.87989 | 2.09511 | 1.8462  | 1.68565 |
| chr16, mir-484  | 2.04043 | 2.25052 | 2.04478 | 2.07043 | 1.91904 | 1.8107  | 1.84826 | 1.65217 |
| chr16, mir-138- | 2.00769 | 2.0762  | 1.99296 | 2.01935 | 1.98676 | 2.13833 | 1.18991 | 1.90231 |
| chr16, mir-328  | 1.91122 | 1.99398 | 1.97459 | 1.93898 | 1.94837 | 2.20633 | 1.30296 | 1.9601  |
| chr16, mir-140  | 1.96817 | 2.11402 | 1.99512 | 2.05488 | 1.935   | 2.30024 | 1.77622 | 2.01049 |
| chr16, mir-768  | 2.05171 | 2.2848  | 2.00138 | 2.12072 | 1.94697 | 2.06717 | 1.86401 | 1.82809 |
| chr17, mir-22   | 1.99587 | 2.1352  | 2.0376  | 2.01373 | 2.0496  | 2.34107 | 1.23733 | 1.7832  |
| chr17, mir-132, | 1.99936 | 2.13063 | 2.03889 | 2.03317 | 2.04048 | 2.35143 | 1.17286 | 1.7619  |
| chr17, mir-195, | 1.97738 | 2.18884 | 2.07748 | 2.0532  | 2.03379 | 2.2666  | 1.15922 | 1.76291 |
| chr17, mir-324  | 1.97777 | 2.18938 | 2.04911 | 2.00982 | 2.04759 | 2.25125 | 1.16991 | 1.72804 |
| chr17, mir-33b  | 1.90292 | 2.01125 | 2.02195 | 1.88153 | 1.99389 | 2.17097 | 1.80958 | 1.97917 |
| chr17, mir-451, | 2.01815 | 2.20426 | 1.98056 | 2.0263  | 1.97074 | 2.17537 | 2.52722 | 1.8837  |
| chr17, mir-423  | 2.13074 | 2.332   | 2.054   | 2.20442 | 2.00232 | 1.89242 | 3.60063 | 1.76926 |
| chr17, mir-193a | 1.95863 | 2.09621 | 1.98589 | 2.00879 | 1.915   | 2.17234 | 1.77605 | 1.9104  |
| chr17, mir-632  | 2.11434 | 2.31973 | 2.05    | 2.2     | 1.91496 | 1.81301 | 1.92894 | 1.78832 |
| chr17, mir-152  | 1.96472 | 2.18454 | 1.99213 | 2.01352 | 1.97065 | 2.00796 | 2.52759 | 1.83778 |
| chr17, mir-10a  | 1.78644 | 2.03576 | 1.92017 | 1.96051 | 2.03873 | 2.17059 | 2.47169 | 1.93441 |

|                 |         |         |         |         |         |         |         |         |
|-----------------|---------|---------|---------|---------|---------|---------|---------|---------|
| chr17, mir-196a | 1.83343 | 2.06451 | 1.95412 | 1.9249  | 2.08598 | 2.25735 | 2.45304 | 1.91902 |
| chr17, mir-142  | 1.93073 | 2.04195 | 1.97451 | 1.90902 | 1.96659 | 1.76622 | 2.30634 | 1.50902 |
| chr17, mir-454, | 2.0017  | 2.33274 | 2.05096 | 2.14896 | 1.93926 | 1.74044 | 2.732   | 1.63311 |
| chr17, mir-21   | 2.10092 | 2.37752 | 2.02927 | 2.13798 | 1.96807 | 1.74927 | 2.81596 | 1.24183 |
| chr17, mir-633  | 1.92744 | 2.19436 | 2.03039 | 2.12577 | 1.94128 | 2.17782 | 2.6182  | 1.96718 |
| chr17, mir-634  | 1.93815 | 2.11361 | 2.03261 | 2.0984  | 1.88504 | 1.84008 | 2.53924 | 1.68782 |
| chr17, mir-548c | 2.01281 | 2.3027  | 2.01831 | 2.13449 | 1.90607 | 2.21191 | 2.74157 | 1.91034 |
| chr17, mir-635  | 2.01264 | 2.18448 | 2.03667 | 2.05345 | 1.95437 | 1.94908 | 2.65218 | 1.78977 |
| chr17, mir-636  | 2.0523  | 2.27699 | 2.06531 | 2.16416 | 2.01841 | 1.69611 | 2.89053 | 1.72788 |
| chr17, mir-657, | 1.86049 | 1.89585 | 1.98854 | 1.91732 | 1.99073 | 2.16976 | 2.24634 | 1.95293 |
| chr18, mir-133a | 3.06424 | 2.33097 | 2.99687 | 2.1159  | 1.89333 | 1.8284  | 1.84361 | 1.65458 |
| chr18, mir-187  | 2.84812 | 1.48029 | 2.8013  | 1.13391 | 1.88783 | 1.94449 | 2.6042  | 1.85681 |
| chr18, mir-122a | 2.6739  | 1.529   | 2.718   | 1.0948  | 1.7094  | 1.8356  | 2.4494  | 1.89    |
| chr19, mir-637  | 2.44333 | 2.09436 | 2.00231 | 1.90795 | 1.97487 | 2.12667 | 1.76538 | 1.90897 |
| chr19, mir-7-3  | 2.5848  | 2.1718  | 1.9732  | 1.9176  | 1.9686  | 2.2518  | 1.8302  | 1.9338  |
| chr19, mir-638  | 2.67644 | 2.16422 | 1.988   | 2.03756 | 2.004   | 2.28622 | 1.88111 | 1.94622 |
| chr19, mir-199a | 2.51471 | 2.07059 | 1.95294 | 1.95216 | 1.94686 | 2.28745 | 1.78961 | 2.00255 |
| chr19, mir-24-2 | 1.92981 | 2.05923 | 2.01135 | 1.93596 | 1.94788 | 2.14789 | 1.80923 | 1.96019 |
| chr19, mir-181c | 1.88436 | 2.046   | 1.98927 | 1.87855 | 1.97345 | 2.30455 | 1.77382 | 1.99418 |
| chr19, mir-639  | 1.98987 | 2.17667 | 2.026   | 1.9792  | 1.96013 | 2.18253 | 1.89187 | 1.9312  |
| chr19, mir-640  | 2.01337 | 2.21375 | 1.99192 | 2.08058 | 1.97183 | 2.15375 | 1.85577 | 1.76827 |
| chr19, mir-641  | 1.91873 | 2.06891 | 1.97782 | 1.97982 | 1.87891 | 2.14836 | 1.79618 | 1.94945 |
| chr19, mir-330  | 1.91388 | 2.02347 | 1.95551 | 1.94184 | 1.94531 | 2.24163 | 1.80735 | 1.95918 |
| chr19, mir-642  | 1.91698 | 2.11811 | 2.00755 | 1.95943 | 1.99283 | 2.28566 | 1.82208 | 1.92113 |
| chr19, mir-769  | 1.87632 | 2.01719 | 1.98474 | 1.93561 | 1.95088 | 2.3114  | 1.75368 | 2.00298 |
| chr19, mir-150  | 1.91556 | 2.16317 | 2.00397 | 1.97857 | 1.94413 | 1.95698 | 1.85175 | 1.80921 |
| chr19, mir-99b, | 1.87171 | 1.984   | 1.97071 | 1.96129 | 1.89414 | 2.13071 | 1.64857 | 1.87771 |
| chr19, mir-643  | 1.86494 | 2.08    | 2.00937 | 2.07924 | 1.83152 | 1.78899 | 1.78038 | 1.76101 |
| chr19, mir-512- | 1.84562 | 2.01057 | 1.97588 | 1.99675 | 1.88304 | 2.26397 | 1.76603 | 2.00954 |
| chr20, mir-103- | 2.04094 | 2.21803 | 2.00393 | 2.22795 | 3.60222 | 2.34872 | 1.92778 | 2.05479 |
| chr20, mir-663  | 1.84615 | 2.03885 | 1.925   | 2.12423 | 2.88692 | 2.44038 | 1.81038 | 2.16385 |
| chr20, mir-644  | 2.08213 | 2.24944 | 2.00046 | 2.24296 | 3.76176 | 3.04658 | 2.82685 | 2.23176 |
| chr20, mir-499  | 1.87493 | 1.96267 | 1.95787 | 1.97893 | 3.06493 | 2.83947 | 2.31627 | 2.3112  |
| chr20, mir-645  | 1.96421 | 2.09486 | 1.95327 | 2.04598 | 3.45299 | 2.05972 | 2.59458 | 2.27598 |
| chr20, mir-296  | 1.97495 | 2.02242 | 1.94821 | 1.97863 | 3.39832 | 2.12589 | 2.35379 | 2.43537 |
| chr20, mir-646  | 1.82704 | 1.87418 | 1.95378 | 2.00898 | 3.26    | 2.045   | 2.31449 | 2.37194 |
| chr20, mir-1-1, | 1.88891 | 1.8125  | 1.95844 | 1.89734 | 3.01484 | 2.21453 | 2.24063 | 2.2725  |

|                   |          |          |          |         |          |          |          |          |
|-------------------|----------|----------|----------|---------|----------|----------|----------|----------|
| chr20, mir-124a   | 1.9      | 1.82429  | 1.94429  | 1.89732 | 3.00839  | 2.82339  | 2.20482  | 2.27875  |
| chr20, mir-647    | 1.95462  | 2.06731  | 1.98019  | 1.96154 | 3.07481  | 2.79212  | 2.43692  | 2.35731  |
| chr21, mir-99a,   | 1.8583   | 2.03829  | 2.01775  | 2.05643 | 1.79876  | 1.96403  | 2.66574  | 1.50705  |
| chr21, mir-125b   | 1.89494  | 2.09525  | 2.04543  | 2.13846 | 1.79636  | 1.91376  | 2.66339  | 1.51049  |
| chr21, mir-155    | 2.0691   | 2.03938  | 2.03938  | 2.022   | 1.69717  | 1.52331  | 2.62366  | 1.57531  |
| chr21, mir-802    | 1.90887  | 2.09113  | 1.96427  | 2.0354  | 1.95992  | 1.9579   | 2.70928  | 1.91444  |
| chr22, mir-648    | 2.03716  | 2.19297  | 1.19662  | 2.02216 | 1.96419  | 2.15473  | 1.795    | 1.78419  |
| chr22, mir-185    | 1.954    | 2.07043  | 1.37629  | 1.996   | 1.95943  | 2.12629  | 1.85257  | 1.96014  |
| chr22, DGCR8-     | 1.97197  | 2.03545  | 1.31446  | 1.99732 | 1.95679  | 2.12625  | 1.91143  | 1.97866  |
| chr22, mir-649    | 1.92532  | 1.9966   | 1.39894  | 1.9117  | 1.97681  | 2.20255  | 1.81362  | 1.98787  |
| chr22, mir-130b   | 1.9793   | 2.12561  | 1.29632  | 2.04842 | 1.96877  | 2.13035  | 1.86175  | 1.86982  |
| chr22, mir-650    | 2.35756  | 0.241667 | 3.19423  | 2.3391  | 1.28295  | 1.36308  | 0.348462 | 1.51333  |
| chr22, PIWIL3     | 2.03441  | 2.25701  | 2.02811  | 2.15673 | 1.97626  | 2.34005  | 1.93578  | 1.95209  |
| chr22, mir-658,   | 1.94671  | 2.16266  | 1.98582  | 2.06924 | 1.98646  | 2.26772  | 1.83962  | 1.95747  |
| chr22, mir-33     | 1.99056  | 2.18875  | 2.01778  | 2.0325  | 1.97653  | 2.01667  | 1.83181  | 1.68431  |
| chr22, let-7a-3,  | 1.86216  | 1.79667  | 1.97647  | 1.80255 | 2.02294  | 1.79686  | 1.69098  | 1.85647  |
| chrX, mir-651     | 1.01024  | 1.91392  | 1.00472  | 1.93344 | 0.92464  | 0.9852   | 1.64696  | 1.18816  |
| chrX, mir-221,    | 0.925283 | 1.85349  | 0.976887 | 1.98764 | 0.945189 | 0.760472 | 1.67849  | 1.09868  |
| chrX, mir-532,    | 0.928246 | 1.86526  | 0.987018 | 1.99754 | 0.94921  | 1.16018  | 1.64956  | 1.0764   |
| chrX, mir-98, let | 0.94777  | 1.90468  | 0.971151 | 1.94907 | 0.927914 | 1.0518   | 1.67856  | 1.01885  |
| chrX, mir-223     | 0.994297 | 1.79703  | 0.979219 | 1.95187 | 0.86453  | 0.839375 | 1.67109  | 0.953048 |
| chrX, mir-421     | 0.951327 | 1.89786  | 0.971632 | 2.03949 | 0.885714 | 0.907449 | 1.67357  | 0.999694 |
| chrX, mir-545,    | 0.946748 | 1.88675  | 0.998455 | 2.06504 | 0.893253 | 0.852764 | 1.69764  | 0.995935 |
| chrX, mir-384     | 0.945357 | 1.90518  | 1.03125  | 2.00196 | 0.924286 | 1.06964  | 1.70929  | 1.09714  |
| chrX, mir-325     | 0.952045 | 1.90159  | 1.00909  | 2.02818 | 0.896591 | 1.06023  | 1.67932  | 1.11386  |
| chrX, mir-361     | 0.97043  | 1.88602  | 1.01097  | 2.08753 | 0.856774 | 0.832903 | 1.73774  | 1.00204  |
| chrX, mir-652     | 0.970374 | 1.9271   | 0.994206 | 2.08103 | 0.949066 | 0.986355 | 1.76075  | 0.980094 |
| chrX, mir-448     | 0.9705   | 1.8345   | 0.992125 | 2.06187 | 0.842125 | 0.88325  | 1.70138  | 1.16013  |
| chrX, mir-766     | 0.97413  | 1.96957  | 0.971087 | 1.94902 | 0.93837  | 1.07609  | 1.82348  | 1.22554  |
| chrX, mir-220     | 0.968293 | 1.90122  | 1.01317  | 2.02341 | 0.922927 | 1.07122  | 1.75878  | 1.32951  |
| chrX, mir-363,    | 1.00454  | 1.88739  | 0.978846 | 2.01715 | 0.894769 | 0.977461 | 1.66692  | 2.38123  |
| chrX, mir-450-1   | 0.983864 | 1.85515  | 0.971818 | 1.96015 | 0.910985 | 1.03386  | 1.65598  | 2.2172   |
| chrX, mir-504     | 0.91377  | 1.80715  | 0.942538 | 2.01077 | 0.859923 | 0.933231 | 1.65446  | 2.301    |
| chrX, mir-505     | 0.954066 | 1.81407  | 0.961098 | 1.92451 | 0.812418 | 0.742857 | 1.66352  | 1.99978  |
| chrX, mir-513-1   | 0.902628 | 1.80335  | 0.98536  | 1.96799 | 0.916185 | 1.0483   | 1.70541  | 2.45366  |
| chrX, FMR1        | 0.993156 | 1.85766  | 1.01255  | 2.0028  | 0.920461 | 0.849397 | 1.84957  | 2.22532  |
| chrX, mir-224,    | 0.88783  | 1.66853  | 0.947907 | 1.87651 | 0.868062 | 1.10496  | 1.58357  | 2.32643  |

chrX, mir-105-1 0.892222 1.77856 0.957889 1.95355 0.903778 1.06078 1.62155 2.458

| TUMOR ID         | WSU-NHL | Ctrl 1  | Ctrl 1 DS | Ctrl 2  | Ctrl2 DS |
|------------------|---------|---------|-----------|---------|----------|
| MIRNA ID         |         |         |           |         |          |
| chr1, mir-200b,  | 1.45163 | 1.92093 | 1.88419   | 1.88349 | 1.73837  |
| chr1, mir-551a   | 1.33226 | 1.89774 | 1.82742   | 1.92548 | 1.78129  |
| chr1, mir-34a    | 1.33187 | 1.9956  | 1.9836    | 1.90213 | 1.9436   |
| chr1, mir-801    | 2.45643 | 2.00691 | 2.02786   | 1.89071 | 1.99     |
| chr1, mir-552    | 2.17403 | 2.01481 | 2.00805   | 1.97857 | 2.06974  |
| chr1, AGO4, A    | 2.44985 | 2.09632 | 2.03676   | 1.94897 | 2.12225  |
| chr1, mir-30e, I | 2.33846 | 2.01199 | 1.9775    | 1.945   | 2.04522  |
| chr1, mir-101-1  | 2.37309 | 2.13373 | 2.07762   | 2.00857 | 2.13651  |
| chr1, SERBP1     | 2.31505 | 2.16505 | 2.11783   | 2.0419  | 2.22266  |
| chr1, mir-186    | 2.34685 | 2.35134 | 2.28027   | 2.26047 | 2.43175  |
| chr1, mir-137    | 2.19682 | 2.40511 | 2.23727   | 2.27205 | 2.37852  |
| chr1, mir-553    | 2.37048 | 2.18056 | 2.0888    | 2.04176 | 2.23448  |
| chr1, mir-197    | 2.39078 | 2.13943 | 2.06092   | 2.03752 | 2.18411  |
| chr1, DDX20      | 2.31049 | 2.07151 | 2.01746   | 2.00687 | 2.09713  |
| chr1, mir-554    | 2.18941 | 1.92107 | 1.93262   | 1.8575  | 1.88476  |
| chr1, mir-92b    | 1.94    | 1.81287 | 1.81759   | 1.74768 | 1.7388   |
| chr1, mir-555    | 2.3417  | 1.92598 | 1.95259   | 1.81964 | 2.01973  |
| chr1, mir-9-1    | 2.17929 | 1.86724 | 1.90354   | 1.81661 | 1.89008  |
| chr1, mir-765    | 1.97658 | 1.87703 | 1.88459   | 1.84414 | 1.81351  |
| chr1, mir-556    | 2.12241 | 1.98139 | 1.99511   | 1.9481  | 2.07131  |
| chr1, mir-557    | 2.19953 | 2.0311  | 2.00496   | 1.94213 | 2.00654  |
| chr1, mir-214, I | 2.23436 | 2.12569 | 2.04379   | 2.03492 | 2.19174  |
| chr1, mir-488    | 2.08653 | 2.12262 | 2.05007   | 2.06503 | 2.08716  |
| chr1, mir-181b-  | 2.42791 | 2.18878 | 2.05946   | 2.0754  | 2.23507  |
| chr1, mir-135b   | 2.09265 | 1.87837 | 1.90326   | 1.84092 | 1.82837  |
| chr1, mir-29c, I | 2.14494 | 2.026   | 2.00038   | 1.98537 | 2.06669  |
| chr1, mir-205    | 2.0589  | 2.0444  | 2.04028   | 1.98431 | 2.06679  |
| chr1, mir-215, I | 2.30836 | 2.26475 | 2.13221   | 2.07295 | 2.31229  |
| chr2, mir-558    | 2.44364 | 2.18136 | 2.08018   | 1.996   | 2.25091  |
| chr2, mir-559    | 1.32532 | 2.07362 | 2.03266   | 1.93926 | 2.09319  |
| chr2, mir-217, I | 2.28754 | 2.175   | 2.07687   | 2.02948 | 2.17791  |
| chr2, mir-560    | 2.12667 | 2.09333 | 2.03      | 1.91222 | 2.22111  |
| chr2, mir-128a   | 2.49195 | 2.18293 | 2.10143   | 2.03346 | 2.17857  |

|                  |         |         |         |         |         |
|------------------|---------|---------|---------|---------|---------|
| chr2, mir-10b    | 2.09865 | 2.14857 | 2.07479 | 2.03639 | 2.11521 |
| chr2, mir-561    | 2.22683 | 2.45158 | 2.28425 | 2.30094 | 2.4964  |
| chr2, mir-26b    | 1.98237 | 1.92898 | 1.91831 | 1.84576 | 1.80898 |
| chr2, mir-375    | 2.00473 | 1.92344 | 1.9072  | 1.87043 | 1.83989 |
| chr2, mir-153-1  | 2.02872 | 1.91474 | 1.91462 | 1.88615 | 1.885   |
| chr2, mir-562    | 2.3575  | 2.133   | 2.06433 | 1.9995  | 2.18817 |
| chr2, mir-149    | 2.00175 | 2.03675 | 1.97125 | 1.986   | 1.96    |
| chr3, mir-563    | 2.38349 | 2.04429 | 2.04651 | 2.02349 | 2.15    |
| chr3, mir-128b   | 2.2325  | 2.27829 | 2.17488 | 2.18799 | 2.32848 |
| chr3, mir-26a-1  | 2.22823 | 2.10573 | 2.06    | 2.01347 | 2.09693 |
| chr3, mir-138-1  | 2.12762 | 2.02564 | 2.0404  | 1.98619 | 2.05071 |
| chr3, mir-564    | 2.23717 | 2.00793 | 2.0275  | 1.98413 | 2.03772 |
| chr3, mir-565    | 2.36903 | 2.10508 | 2.0379  | 2.03161 | 2.17484 |
| chr3, mir-425, l | 1.36929 | 1.93546 | 1.95636 | 1.89121 | 1.89252 |
| chr3, mir-566    | 1.42831 | 1.96746 | 1.93339 | 1.91746 | 1.83373 |
| chr3, let-7g, mi | 2.25608 | 1.99724 | 1.97265 | 1.92403 | 1.99613 |
| chr3, mir-567    | 2.25489 | 2.13752 | 2.09489 | 2.10569 | 2.15256 |
| chr3, mir-568    | 2.31019 | 2.11401 | 2.07134 | 2.06083 | 2.16783 |
| chr3, mir-198    | 2.2608  | 2.1188  | 2.08832 | 2.03016 | 2.08464 |
| chr3, mir-15b, l | 2.29812 | 2.19974 | 2.10968 | 2.09234 | 2.28188 |
| chr3, mir-551b   | 2.3099  | 2.32097 | 2.16048 | 2.2032  | 2.35408 |
| chr3, mir-569    | 2.21837 | 2.16044 | 2.08793 | 2.06415 | 2.19296 |
| chr3, mir-28     | 2.41184 | 2.10716 | 2.04112 | 1.98379 | 2.14574 |
| chr3, mir-570    | 1.78237 | 2.22553 | 1.90605 | 1.86184 | 2.17684 |
| chr4, mir-571    | 1.47647 | 2.29412 | 2.10059 | 2.15294 | 2.24882 |
| chr4, mir-95     | 1.22514 | 2.01657 | 2.04343 | 1.98471 | 1.99871 |
| chr4, mir-572    | 1.22089 | 2.22494 | 2.1643  | 2.11848 | 2.29899 |
| chr4, mir-218-1  | 1.20574 | 2.46213 | 2.28981 | 2.27632 | 2.47213 |
| chr4, mir-573    | 1.27205 | 2.28095 | 2.22701 | 2.15417 | 2.32614 |
| chr4, mir-574    | 1.33768 | 2.06222 | 2.05313 | 1.99252 | 2.1705  |
| chr4, mir-575    | 2.28456 | 2.02194 | 2.04019 | 1.96204 | 2.0265  |
| chr4, mir-576    | 2.35431 | 2.26267 | 2.16216 | 2.13069 | 2.32914 |
| chr4, mir-367, l | 2.37462 | 2.20886 | 2.11455 | 2.08818 | 2.25962 |
| chr4, mir-577    | 2.29018 | 2.37958 | 2.22819 | 2.23729 | 2.43349 |
| chr4, mir-578    | 2.40778 | 2.2896  | 2.19722 | 2.17294 | 2.35825 |
| chr5, Drosha     | 2.21721 | 2.11585 | 2.06101 | 1.98954 | 2.16288 |
| chr5, mir-579    | 2.38218 | 2.10034 | 2.03293 | 1.97571 | 2.12442 |

|                  |         |         |         |         |         |
|------------------|---------|---------|---------|---------|---------|
| chr5, mir-580    | 2.2048  | 2.1964  | 2.08624 | 2.0552  | 2.16912 |
| chr5, mir-581    | 2.24522 | 2.19522 | 2.14276 | 2.0497  | 2.28918 |
| chr5, mir-449, l | 2.30775 | 2.13297 | 2.06565 | 2.00333 | 2.17196 |
| chr5, mir-582    | 2.13975 | 2.20692 | 2.10908 | 2.10508 | 2.23058 |
| chr5, mir-9-2    | 2.24744 | 2.19175 | 2.09594 | 2.08981 | 2.204   |
| chr5, mir-583    | 2.33684 | 2.18383 | 2.07083 | 2.04947 | 2.15331 |
| chr5, mir-584    | 2.12121 | 2.05313 | 2.00289 | 1.94386 | 2.0553  |
| chr5, mir-143, l | 2.03446 | 1.90208 | 1.92911 | 1.90208 | 1.8805  |
| chr5, mir-378    | 2.12819 | 2.02325 | 1.96952 | 1.94084 | 1.91988 |
| chr5, mir-146a   | 2.32596 | 2.07111 | 2.02455 | 1.95606 | 2.07404 |
| chr5, mir-103-1  | 2.24811 | 2.13    | 2.08394 | 1.99939 | 2.24674 |
| chr5, mir-218-2  | 2.05991 | 2.08869 | 2.03271 | 1.97953 | 1.99112 |
| chr5, mir-585    | 2.191   | 2.04218 | 2.02536 | 1.98691 | 2.002   |
| chr5, mir-340    | 2.33387 | 2.02194 | 1.98151 | 1.90269 | 2.07624 |
| chr6, mir-548a-  | 2.33016 | 2.07374 | 2.04154 | 2.01285 | 2.1139  |
| chr6, mir-219-1  | 2.09495 | 1.87907 | 1.88402 | 1.83505 | 1.81949 |
| chr6, XPO5       | 2.27872 | 1.94115 | 1.94689 | 1.87487 | 1.96013 |
| chr6, mir-586    | 2.35871 | 2.27785 | 2.12233 | 2.12215 | 2.28457 |
| chr6, mir-206, l | 2.2987  | 2.03007 | 1.98604 | 1.93892 | 2.07137 |
| chr6, mir-30c-2  | 2.25432 | 2.31977 | 2.22443 | 2.17894 | 2.35087 |
| chr6, mir-587    | 2.26509 | 2.03927 | 2.02891 | 1.99636 | 2.04518 |
| chr6, mir-548b   | 2.34681 | 2.25407 | 2.15956 | 2.16407 | 2.29735 |
| chr6, mir-588    | 2.46443 | 2.46393 | 2.25262 | 2.25443 | 2.46246 |
| chr6, mir-548a-  | 2.46118 | 2.19528 | 2.13732 | 2.10646 | 2.24441 |
| chr7, mir-339    | 1.74553 | 1.82684 | 1.77079 | 1.78053 | 1.7     |
| chr7, mir-589    | 1.77314 | 1.75353 | 1.74078 | 1.7351  | 1.69902 |
| chr7, mir-148a   | 2.14813 | 1.96833 | 1.93156 | 1.91135 | 2.01229 |
| chr7, mir-196b   | 2.02187 | 1.95844 | 1.97333 | 1.94781 | 1.91479 |
| chr7, mir-550-1  | 2.35123 | 2.05074 | 1.99679 | 1.98975 | 2.10704 |
| chr7, has-mir-5  | 2.25000 | 2.12000 | 1.95000 | 1.98000 | 2.13000 |
| chr7, mir-590    | 2.23473 | 1.90677 | 1.91387 | 1.81495 | 1.95194 |
| chr7, mir-653, l | 2.19969 | 2.1175  | 1.99563 | 2.00181 | 2.16394 |
| chr7, mir-591    | 2.05464 | 2.10072 | 2.03008 | 2.03368 | 2.1908  |
| chr7, mir-25, m  | 2.02159 | 1.73062 | 1.75664 | 1.66203 | 1.70743 |
| chr7, mir-592    | 2.12569 | 2.13262 | 2.01946 | 2.006   | 2.18938 |
| chr7, SDN1, m    | 2.20283 | 2.0174  | 1.96899 | 1.94087 | 2.0181  |
| chr7, mir-129-1  | 2.08045 | 1.87629 | 1.8909  | 1.84584 | 1.82034 |



|                   |         |         |         |         |         |
|-------------------|---------|---------|---------|---------|---------|
| chr7, mir-182, l  | 1.9803  | 1.82061 | 1.82697 | 1.79636 | 1.7504  |
| chr7, mir-335     | 2.15531 | 2.01789 | 1.9682  | 1.91227 | 2.00523 |
| chr7, mir-29a, l  | 2.28895 | 2.044   | 1.99653 | 1.93337 | 2.03021 |
| chr7, mir-490     | 2.16763 | 2.22444 | 2.10006 | 2.09781 | 2.29225 |
| chr7, has-mir-5   | 2.25488 | 1.97786 | 1.93155 | 1.89155 | 1.9944  |
| chr7, mir-671     | 1.93606 | 1.87336 | 1.83923 | 1.80712 | 1.78788 |
| chr7, mir-153-2   | 2.11884 | 1.94546 | 1.94756 | 1.87512 | 1.97314 |
| chr7, mir-595     | 1.88371 | 1.91815 | 1.87901 | 1.86222 | 1.89383 |
| chr8, mir-596     | 2.18478 | 2.23029 | 2.18594 | 2.11029 | 2.19942 |
| chr8, mir-597     | 2.42676 | 2.31883 | 2.19021 | 2.13014 | 2.33572 |
| chr8, mir-124a-   | 2.13714 | 2.08143 | 2.05393 | 2.02768 | 2.08554 |
| chr8, mir-598     | 2.19552 | 1.97333 | 1.99874 | 1.92287 | 1.98632 |
| chr8, mir-383     | 2.21918 | 2.49309 | 2.33618 | 2.33555 | 2.50136 |
| chr8, mir-320, l  | 2.39602 | 2.06884 | 2.05201 | 1.96692 | 2.09186 |
| chr8, mir-486     | 1.92859 | 1.96847 | 1.96659 | 1.89706 | 1.84459 |
| chr8, mir-124a-   | 2.23026 | 2.34019 | 2.21167 | 2.24827 | 2.35462 |
| chr8, mir-599     | 2.40732 | 2.31886 | 2.17819 | 2.15403 | 2.3498  |
| chr8, mir-548a-   | 2.24942 | 2.28787 | 2.19377 | 2.15238 | 2.33893 |
| chr8, mir-548d-   | 2.36507 | 2.05261 | 2.02716 | 1.96873 | 2.16403 |
| chr8, mir-30b, l  | 2.35967 | 2.18934 | 2.05888 | 2.05757 | 2.2375  |
| chr8, AGO2        | 2.11441 | 1.91593 | 1.94685 | 1.90191 | 1.93876 |
| chr8, mir-151     | 2.25075 | 2.03892 | 1.99317 | 1.93083 | 2.13167 |
| chr8, mir-661     | 1.73946 | 1.85676 | 1.77    | 1.84865 | 1.70459 |
| chr9, mir-101-2   | 1.33517 | 2.1345  | 2.0896  | 2.01974 | 2.14715 |
| chr9, mir-491     | 1.27276 | 2.29448 | 2.18336 | 2.18507 | 2.29761 |
| chr9, mir-31      | 1.24771 | 2.42763 | 2.28814 | 2.21314 | 2.43619 |
| chr9, mir-204     | 2.23562 | 2.20124 | 2.13336 | 2.08672 | 2.23474 |
| chr9, mir-7-1     | 2.34441 | 2.12092 | 2.09858 | 2.0245  | 2.18508 |
| chr9, let-7a-1, l | 2.38247 | 2.12505 | 2.0765  | 2.02557 | 2.20165 |
| chr9, mir-23b, l  | 2.03162 | 1.97314 | 2.01543 | 1.99048 | 2.00257 |
| chr9, mir-32      | 2.34531 | 2.13055 | 2.07305 | 2.04352 | 2.16992 |
| chr9, mir-455     | 1.95686 | 1.93619 | 1.9419  | 1.90638 | 1.86305 |
| chr9, mir-147     | 2.2126  | 1.97635 | 1.96875 | 1.96958 | 2.00031 |
| chr9, mir-600     | 2.23241 | 2.01934 | 2.00628 | 1.94635 | 1.98788 |
| chr9, mir-601     | 2.0199  | 1.89938 | 1.8926  | 1.84812 | 1.8699  |
| chr9, mir-181a-   | 2.41293 | 2.06698 | 1.99965 | 1.89715 | 2.06741 |
| chr9, mir-199b    | 2.04018 | 1.86545 | 1.93055 | 1.80836 | 1.84218 |

|                  |         |         |         |         |         |
|------------------|---------|---------|---------|---------|---------|
| chr9, mir-219-2  | 2.00947 | 1.82658 | 1.82829 | 1.78553 | 1.75789 |
| chr9, mir-126    | 1.63519 | 1.85926 | 1.76815 | 1.8763  | 1.68148 |
| chr9, mir-602    | 1.97079 | 1.90474 | 1.85711 | 1.85868 | 1.80184 |
| chr10, mir-511-  | 2.095   | 2.09    | 2.01    | 2.04    | 2.07    |
| chr10, mir-603   | 2.13645 | 2.1943  | 2.16331 | 2.09017 | 2.2214  |
| chr10, mir-604   | 2.30326 | 2.19148 | 2.16459 | 2.10259 | 2.22208 |
| chr10, mir-605   | 2.32234 | 2.32336 | 2.20438 | 2.21    | 2.38299 |
| chr10, mir-606   | 2.28183 | 2.11043 | 2.06215 | 2.05097 | 2.16301 |
| chr10, mir-346   | 2.11878 | 1.98932 | 1.97068 | 1.91243 | 1.93176 |
| chr10, mir-107   | 2.26754 | 2.19842 | 2.1221  | 2.07316 | 2.18281 |
| chr10, mir-607   | 2.43763 | 2.00711 | 1.99783 | 1.93227 | 2.08691 |
| chr10, mir-608   | 2.19744 | 1.95521 | 1.97058 | 1.8838  | 1.94893 |
| chr10, mir-146b  | 2.07355 | 1.89694 | 1.93145 | 1.86177 | 1.8479  |
| chr10, mir-609   | 2.36389 | 2.13345 | 2.06823 | 1.99876 | 2.17912 |
| chr10, mir-202   | 1.84171 | 2.0022  | 1.83415 | 1.89683 | 1.82342 |
| chr11, mir-210   | 2.03341 | 1.91796 | 1.82795 | 1.8525  | 1.76273 |
| chr11, mir-483   | 2.07849 | 2.06591 | 1.95303 | 1.97818 | 1.98439 |
| chr11, mir-610   | 2.22554 | 2.38266 | 2.22259 | 2.2146  | 2.45575 |
| chr11, mir-129-  | 2.11392 | 2.05993 | 2.0186  | 1.96664 | 2.07308 |
| chr11, mir-130a  | 2.29736 | 2.01839 | 2.02023 | 1.90069 | 1.94345 |
| chr11, mir-611   | 2.12351 | 1.95966 | 1.94427 | 1.92752 | 1.91436 |
| chr11, mir-192,  | 2.0631  | 1.85276 | 1.86293 | 1.85776 | 1.79931 |
| chr11, mir-612   | 2.2261  | 1.93883 | 1.95597 | 1.87623 | 1.96857 |
| chr11, MALAT1    | 2.36918 | 1.95    | 2.00725 | 1.9101  | 2.03143 |
| chr11, mir-139   | 1.92988 | 1.86241 | 1.84699 | 1.83723 | 1.80687 |
| chr11, mir-326   | 1.94139 | 1.87264 | 1.91222 | 1.8375  | 1.85306 |
| chr11, PIWIL4    | 2.19468 | 2.21949 | 2.12688 | 2.07573 | 2.21291 |
| chr11, mir-34b,  | 2.39774 | 2.07027 | 2.02692 | 1.98568 | 2.16315 |
| chr11, mir-125b  | 2.37196 | 2.19137 | 2.09631 | 2.04797 | 2.21405 |
| chr11, let-7a-2, | 2.32121 | 2.14324 | 2.0772  | 2.02868 | 2.15593 |
| chr12, mir-200c  | 2.08093 | 1.89196 | 1.92476 | 1.84121 | 1.82598 |
| chr12, mir-613   | 2.29802 | 2.04889 | 2.00852 | 1.90222 | 2.12938 |
| chr12, mir-614   | 2.14798 | 2.00737 | 1.97351 | 1.91877 | 1.99544 |
| chr12, mir-196a  | 1.9543  | 1.88243 | 1.88486 | 1.85486 | 1.84636 |
| chr12, mir-615   | 2.03951 | 1.87098 | 1.85107 | 1.84189 | 1.85607 |
| chr12, mir-148b  | 2.19093 | 1.89339 | 1.89627 | 1.805   | 1.88712 |
| chr12, mir-616   | 2.18141 | 1.90333 | 1.85273 | 1.79394 | 1.8099  |

|                 |         |         |         |         |         |
|-----------------|---------|---------|---------|---------|---------|
| chr12, mir-26a- | 2.13539 | 1.88974 | 1.88357 | 1.8647  | 1.85652 |
| chr12, let-7i   | 2.25197 | 2.1763  | 2.05352 | 2.0287  | 2.24049 |
| chr12, mir-548c | 2.18783 | 2.03242 | 1.98917 | 1.90442 | 2.04267 |
| chr12, mir-617  | 2.11547 | 2.25292 | 2.14679 | 2.17197 | 2.29117 |
| chr12, mir-618  | 2.09297 | 2.2549  | 2.12365 | 2.17952 | 2.27517 |
| chr12, mir-492  | 2.18323 | 1.94765 | 1.97088 | 1.87235 | 2.01912 |
| chr12, mir-331  | 2.36    | 2.09534 | 2.01076 | 1.94061 | 2.12038 |
| chr12, mir-135a | 2.22407 | 2.1584  | 2.106   | 2.08273 | 2.23707 |
| chr12, mir-619  | 2.15491 | 1.92655 | 1.93388 | 1.84828 | 1.90319 |
| chr12, mir-620  | 2.38873 | 2.10107 | 2.04228 | 1.95819 | 2.1741  |
| chr12, PIWIL1   | 2.1416  | 2.12983 | 2.07685 | 2.04525 | 2.12719 |
| chr12, RAN      | 2.19679 | 2.05603 | 2.03231 | 2.00654 | 2.07167 |
| chr13, mir-621  | 3.21645 | 2.03693 | 1.975   | 1.90048 | 2.00919 |
| chr13, mir-16-1 | 3.8776  | 2.35876 | 2.19132 | 2.13289 | 2.39264 |
| chr13, mir-622  | 3.13486 | 2.36802 | 2.20451 | 2.17622 | 2.35784 |
| chr13, mir-17,  | 3.22271 | 2.17414 | 2.06714 | 2.06459 | 2.29722 |
| chr13, mir-623  | 3.14515 | 2.02707 | 2.00061 | 1.97091 | 2.03333 |
| chr14, mir-208  | 2.11092 | 1.98073 | 1.98055 | 1.93954 | 1.90706 |
| chr14, mir-624  | 2.36357 | 2.18619 | 2.09452 | 1.98893 | 2.23905 |
| chr14, mir-625  | 2.54356 | 2.23402 | 2.12931 | 2.04425 | 2.27575 |
| chr14, Dicer1   | 2.36189 | 2.1285  | 2.07792 | 2.03136 | 2.14356 |
| chr14, mir-342  | 2.15813 | 2.00885 | 1.95438 | 1.91052 | 1.92812 |
| chr14, mir-345  | 1.9287  | 1.91222 | 1.87019 | 1.91185 | 1.78833 |
| chr14, mir-770, | 2.14389 | 2.02279 | 1.98775 | 1.975   | 2.0093  |
| chr14, mir-379, | 2.10543 | 2.03669 | 2.00387 | 1.97561 | 1.937   |
| chr14, mir-203  | 1.74882 | 1.895   | 1.865   | 1.87971 | 1.805   |
| chr15, mir-211  | 2.24673 | 2.02214 | 1.97867 | 1.92286 | 2.01449 |
| chr15, mir-626  | 2.56741 | 2.19271 | 2.15753 | 2.04235 | 2.24059 |
| chr15, mir-627  | 2.43398 | 2.12796 | 2.11092 | 1.97092 | 2.16837 |
| chr15, mir-628  | 2.46265 | 2.27409 | 2.16038 | 2.08712 | 2.34682 |
| chr15, mir-190  | 2.25941 | 2.05467 | 2.0517  | 2.00155 | 2.03659 |
| chr15, mir-422a | 2.24311 | 1.97055 | 1.95089 | 1.89022 | 1.93211 |
| chr15, mir-629  | 2.1596  | 1.97472 | 1.99152 | 1.9788  | 1.96744 |
| chr15, mir-630  | 2.34957 | 2.15635 | 2.11087 | 2.06217 | 2.21487 |
| chr15, mir-631  | 2.06949 | 1.94291 | 1.90823 | 1.90899 | 1.87253 |
| chr15, mir-184  | 2.23964 | 2.05179 | 2.00652 | 1.97553 | 2.00759 |
| chr15, mir-549  | 2.21351 | 2.07234 | 2.05099 | 1.98504 | 2.06162 |

|                 |         |         |         |         |         |
|-----------------|---------|---------|---------|---------|---------|
| chr15, mir-7-2  | 2.20059 | 2.06976 | 2.06917 | 1.9975  | 2.12095 |
| chr15, mir-9-3  | 2.15112 | 1.965   | 1.98582 | 1.945   | 1.89796 |
| chr16, mir-662  | 1.83615 | 1.83385 | 1.85615 | 1.87923 | 1.69462 |
| chr16, mir-193b | 2.23511 | 1.96652 | 1.97217 | 1.87772 | 1.97087 |
| chr16, mir-484  | 2.33678 | 2.00191 | 1.99104 | 1.92852 | 2.05183 |
| chr16, mir-138- | 3.03333 | 1.95204 | 1.95796 | 1.90731 | 1.90046 |
| chr16, mir-328  | 2.5102  | 1.89694 | 1.86704 | 1.85939 | 1.79643 |
| chr16, mir-140  | 3.04768 | 1.93744 | 1.94793 | 1.84561 | 1.92085 |
| chr16, mir-768  | 3.45257 | 2.06296 | 2.01829 | 1.94257 | 2.1523  |
| chr17, mir-22   | 1.37507 | 1.85827 | 1.91573 | 1.88613 | 1.8948  |
| chr17, mir-132, | 1.37746 | 1.9881  | 1.95429 | 1.95333 | 1.92349 |
| chr17, mir-195, | 1.41447 | 2.01049 | 2.0132  | 1.96447 | 1.96311 |
| chr17, mir-324  | 1.39857 | 1.94938 | 1.98768 | 1.93304 | 1.92214 |
| chr17, mir-33b  | 1.41056 | 1.93611 | 1.8825  | 1.91167 | 1.77278 |
| chr17, mir-451, | 3.03315 | 1.91259 | 1.92833 | 1.82519 | 1.86574 |
| chr17, mir-423  | 3.53674 | 2.09389 | 2.06484 | 1.97853 | 2.20558 |
| chr17, mir-193a | 3.00202 | 1.94347 | 1.93935 | 1.87331 | 1.92387 |
| chr17, mir-632  | 3.54531 | 2.08903 | 2.07673 | 1.95097 | 2.14168 |
| chr17, mir-152  | 3.05546 | 1.89083 | 1.92046 | 1.84731 | 1.89676 |
| chr17, mir-10a  | 2.93509 | 1.91475 | 1.94763 | 1.86856 | 1.86424 |
| chr17, mir-196a | 2.94804 | 1.95186 | 1.95794 | 1.87039 | 1.97461 |
| chr17, mir-142  | 2.57622 | 1.93707 | 1.92281 | 1.91756 | 1.88427 |
| chr17, mir-454, | 3.43637 | 2.09141 | 2.05726 | 1.99274 | 2.17096 |
| chr17, mir-21   | 3.44101 | 2.01578 | 2.02165 | 1.92569 | 2.11651 |
| chr17, mir-633  | 2.90859 | 2.13013 | 2.06923 | 1.98051 | 2.17679 |
| chr17, mir-634  | 2.75546 | 2.03336 | 2.02891 | 1.96966 | 2.05504 |
| chr17, mir-548c | 2.83978 | 2.05079 | 2.00348 | 1.90629 | 2.03034 |
| chr17, mir-635  | 2.71667 | 1.94759 | 1.9746  | 1.91299 | 1.97598 |
| chr17, mir-636  | 3.21699 | 2.04327 | 2.03292 | 1.95089 | 2.10655 |
| chr17, mir-657, | 2.2539  | 1.92317 | 1.84171 | 1.93659 | 1.71878 |
| chr18, mir-133a | 2.36687 | 2.15722 | 2.06799 | 2.03389 | 2.24486 |
| chr18, mir-187  | 2.17478 | 2.1258  | 2.05    | 2.01754 | 2.10783 |
| chr18, mir-122a | 2.1969  | 1.9163  | 1.9499  | 1.9087  | 1.9633  |
| chr19, mir-637  | 1.99051 | 1.92205 | 1.89385 | 1.86205 | 1.77821 |
| chr19, mir-7-3  | 2.199   | 1.9222  | 1.897   | 1.8456  | 1.8464  |
| chr19, mir-638  | 2.18911 | 1.89778 | 1.9     | 1.84356 | 1.90711 |
| chr19, mir-199a | 2.02588 | 1.87157 | 1.88216 | 1.83784 | 1.83588 |

|                  |          |         |         |         |         |
|------------------|----------|---------|---------|---------|---------|
| chr19, mir-24-2  | 2.02596  | 1.98308 | 1.90942 | 1.89961 | 1.88019 |
| chr19, mir-181c  | 1.98382  | 1.89836 | 1.87018 | 1.81309 | 1.82491 |
| chr19, mir-639   | 2.22307  | 1.95453 | 1.94347 | 1.85053 | 1.90387 |
| chr19, mir-640   | 2.27221  | 1.97865 | 1.99837 | 1.8974  | 1.97808 |
| chr19, mir-641   | 2.10927  | 1.88709 | 1.92673 | 1.87945 | 1.81927 |
| chr19, mir-330   | 2.08245  | 1.89653 | 1.88714 | 1.80735 | 1.85408 |
| chr19, mir-642   | 2.12075  | 1.86472 | 1.88849 | 1.84623 | 1.92    |
| chr19, mir-769   | 2.06351  | 1.92175 | 1.90123 | 1.85175 | 1.89035 |
| chr19, mir-150   | 2.14825  | 1.86857 | 1.87587 | 1.83794 | 1.84286 |
| chr19, mir-99b,  | 2.144    | 1.95543 | 1.95157 | 1.90343 | 1.97129 |
| chr19, mir-643   | 2.27835  | 2.07911 | 2.03316 | 1.94582 | 2.03405 |
| chr19, mir-512-  | 2.14809  | 2.00289 | 2.03247 | 1.90856 | 2.01201 |
| chr20, mir-103-  | 2.32496  | 2.0088  | 1.99889 | 1.9288  | 2.0441  |
| chr20, mir-663   | 2.26231  | 2.16154 | 2.08692 | 2.02462 | 2.32692 |
| chr20, mir-644   | 2.40528  | 2.02454 | 2.005   | 1.92546 | 2.17843 |
| chr20, mir-499   | 1.93787  | 1.86773 | 1.87653 | 1.8272  | 1.84627 |
| chr20, mir-645   | 2.21822  | 1.94056 | 1.95094 | 1.91262 | 1.95066 |
| chr20, mir-296   | 2.04453  | 1.93863 | 1.95516 | 1.90505 | 1.94358 |
| chr20, mir-646   | 2.06112  | 2.11296 | 2.07337 | 2.0449  | 2.05173 |
| chr20, mir-1-1,  | 1.82797  | 1.88344 | 1.84328 | 1.85734 | 1.795   |
| chr20, mir-124a  | 1.81     | 1.89107 | 1.84    | 1.84893 | 1.75482 |
| chr20, mir-647   | 1.98981  | 1.94538 | 1.84942 | 1.90711 | 1.80346 |
| chr21, mir-99a,  | 2.20217  | 2.3055  | 2.18953 | 2.18791 | 2.39496 |
| chr21, mir-125b  | 2.25648  | 2.3758  | 2.2366  | 2.2492  | 2.41728 |
| chr21, mir-155   | 2.27834  | 2.1851  | 2.08228 | 2.07848 | 2.24248 |
| chr21, mir-802   | 2.27565  | 2.09702 | 2.06726 | 1.98548 | 2.08984 |
| chr22, mir-648   | 2.28919  | 1.94797 | 1.97081 | 1.91203 | 1.98419 |
| chr22, mir-185   | 2.043    | 1.91971 | 1.88071 | 1.86843 | 1.80257 |
| chr22, DGCR8-    | 2.02982  | 1.95598 | 1.96473 | 1.90705 | 1.90572 |
| chr22, mir-649   | 1.99319  | 1.96404 | 1.86234 | 1.88979 | 1.78872 |
| chr22, mir-130b  | 2.23509  | 1.93789 | 1.92333 | 1.91386 | 1.87772 |
| chr22, mir-650   | 0.399487 | 2.19115 | 2.23308 | 2.15526 | 2.21103 |
| chr22, PIWIL3    | 2.3563   | 2.0372  | 2.02137 | 1.89313 | 2.07787 |
| chr22, mir-658,  | 2.18367  | 1.90823 | 1.94797 | 1.84747 | 1.92215 |
| chr22, mir-33    | 2.18305  | 1.95708 | 1.94083 | 1.91528 | 1.93806 |
| chr22, let-7a-3, | 1.74647  | 1.83804 | 1.81059 | 1.88686 | 1.71922 |
| chrX, mir-651    | 2.03056  | 1.2064  | 3.81048 | 3.65808 | 1.17232 |

|                  |         |         |         |         |         |
|------------------|---------|---------|---------|---------|---------|
| chrX, mir-221,   | 2.00453 | 1.17651 | 3.8733  | 3.72906 | 1.19868 |
| chrX, mir-532,   | 1.97325 | 1.26307 | 3.48623 | 3.2543  | 1.25675 |
| chrX, mir-98, le | 1.96684 | 1.1559  | 3.41022 | 3.2005  | 1.15324 |
| chrX, mir-223    | 1.97258 | 1.17961 | 3.68336 | 3.45508 | 1.19703 |
| chrX, mir-421    | 2.05082 | 1.23694 | 3.67592 | 3.48786 | 1.19306 |
| chrX, mir-545,   | 2.04439 | 1.20943 | 3.81976 | 3.71163 | 1.18285 |
| chrX, mir-384    | 1.99286 | 1.21554 | 3.86536 | 3.75857 | 1.25268 |
| chrX, mir-325    | 1.98841 | 1.2125  | 3.85818 | 3.58318 | 1.1775  |
| chrX, mir-361    | 2.03742 | 1.29065 | 4.11473 | 4.06495 | 1.26344 |
| chrX, mir-652    | 1.9985  | 1.19449 | 3.7428  | 3.56907 | 1.17626 |
| chrX, mir-448    | 2.0935  | 1.292   | 4.17438 | 4.08038 | 1.27575 |
| chrX, mir-766    | 2.00511 | 1.22587 | 3.13957 | 2.96924 | 1.14978 |
| chrX, mir-220    | 2.02122 | 1.21634 | 3.69537 | 3.42707 | 1.16683 |
| chrX, mir-363,   | 1.97223 | 1.18723 | 3.81608 | 3.54623 | 1.14592 |
| chrX, mir-450-1  | 1.93932 | 1.16705 | 3.52704 | 3.39636 | 1.14205 |
| chrX, mir-504    | 1.94431 | 1.23808 | 4.08223 | 3.97523 | 1.19215 |
| chrX, mir-505    | 1.93945 | 1.23396 | 3.92143 | 3.72648 | 1.21077 |
| chrX, mir-513-1  | 1.95603 | 1.21237 | 3.93902 | 3.85129 | 1.22485 |
| chrX, FMR1       | 1.97333 | 1.25284 | 3.82961 | 3.7689  | 1.20887 |
| chrX, mir-224,   | 1.84767 | 1.24721 | 3.47682 | 3.42597 | 1.18628 |
| chrX, mir-105-1  | 1.98711 | 1.15867 | 3.862   | 3.84289 | 1.18611 |
