# Supplementary material
Source: PubMed Central journal article supplement (PMC3401058)
Supplement: supp_blood-2009-01-202028_TableS4.pdf [file supp_blood-2009-01-202028_TableS4.pdf]

The values are the number of total samples in each group and the number of samples with gain or loss in each group.

Gain:

| miRNA             | p-value  | GCB gain | GCB total | Non-GCB gain | Non-GCB total |
|-------------------|----------|----------|-----------|--------------|---------------|
| chr5, mir-146a    | 0.044826 | 4        | 22        | 0            | 24            |
| chr5, mir-585     | 0.044826 | 4        | 22        | 0            | 24            |
| chr12, mir-613    | 0.043108 | 6        | 22        | 1            | 24            |
| chr12, mir-614    | 0.043108 | 6        | 22        | 1            | 24            |
| chr12, let-7i     | 0.014928 | 9        | 22        | 2            | 24            |
| chr12, mir-548c   | 0.032276 | 8        | 22        | 2            | 24            |
| chr12, mir-492    | 0.043108 | 6        | 22        | 1            | 24            |
| chr12, mir-135a-2 | 0.032276 | 8        | 22        | 2            | 24            |
| chr12, mir-619    | 0.043108 | 6        | 22        | 1            | 24            |
| chr12, PIWIL1     | 0.043108 | 6        | 22        | 1            | 24            |
| chr12, RAN        | 0.043108 | 6        | 22        | 1            | 24            |
| chr16, mir-140    | 0.044826 | 4        | 22        | 0            | 24            |

Loss:

| miRNA          | p-value  | GCB loss | GCB total | Non-GCB loss | Non-GCB total |
|----------------|----------|----------|-----------|--------------|---------------|
| chr4, mir-574  | 0.044826 | 4        | 22        | 0            | 24            |
| chr12, mir-614 | 0.044826 | 4        | 22        | 0            | 24            |
