# Supplementary material
Source: PubMed Central journal article supplement (PMC3401058)
Supplement: supp_blood-2009-01-202028_TableS5.pdf [file supp_blood-2009-01-202028_TableS5.pdf]

The values are the number of total samples in each group and the number of samples with gain or loss in each group.

Gain:

| miRNA                            | p-value  | LN gain | LN total | XN gain | XN total |
|----------------------------------|----------|---------|----------|---------|----------|
| chr8, mir-596                    | 0.018841 | 0       | 33       | 3       | 13       |
| chr8, mir-597                    | 0.018841 | 0       | 33       | 3       | 13       |
| chr8, mir-124a-1                 | 0.018841 | 0       | 33       | 3       | 13       |
| chr8, mir-486                    | 0.018152 | 1       | 33       | 4       | 13       |
| chr9, mir-23b, mir-27b, mir-24-1 | 0.045021 | 2       | 33       | 4       | 13       |
| chr10, mir-609                   | 0.018841 | 0       | 33       | 3       | 13       |
| chr11, mir-34b, mir-34c          | 0.000939 | 0       | 33       | 5       | 13       |
| chr12, mir-616                   | 0.045021 | 2       | 33       | 4       | 13       |
| chr12, mir-26a-2                 | 0.045021 | 2       | 33       | 4       | 13       |
| chr12, mir-548c                  | 0.019695 | 4       | 33       | 6       | 13       |
| chr21, mir-99a, let-7c           | 0.018841 | 0       | 33       | 3       | 13       |

Loss:

| miRNA                    | p-value  | LN loss | LN total | XN loss | XN total |
|--------------------------|----------|---------|----------|---------|----------|
| chr3, let-7g, mir-135a-1 | 0.018152 | 1       | 33       | 4       | 13       |
| chr6, mir-219-1          | 0.018841 | 0       | 33       | 3       | 13       |
| chrX, mir-651            | 0.045021 | 2       | 33       | 4       | 13       |

LN= Lymph node

XN= extranodal
