# Supplementary material
Source: PubMed Central journal article supplement (PMC3401058)
Supplement: supp_blood-2009-01-202028_TableS6.pdf [file supp_blood-2009-01-202028_TableS6.pdf]

The values are the number of total samples in each group and the number of samples with gain or loss in each group.

Gain:

| miRNA                          | p-value  | Tumor gain | Tumor total | Cell line gain | Cell line total |
|--------------------------------|----------|------------|-------------|----------------|-----------------|
| chr1, mir-801                  | 0.047029 | 0          | 46          | 3              | 27              |
| chr1, AGO4, AGO1, AGO3         | 0.016124 | 0          | 46          | 4              | 27              |
| chr2, mir-560                  | 0.022616 | 8          | 46          | 0              | 27              |
| chr3, mir-28                   | 0.032316 | 3          | 46          | 7              | 27              |
| chr4, mir-578                  | 0.047029 | 0          | 46          | 3              | 27              |
| chr6, mir-588                  | 0.005375 | 0          | 46          | 5              | 27              |
| chr6, mir-548a-2               | 0.000545 | 0          | 46          | 7              | 27              |
| chr7, mir-148a                 | 0.000788 | 4          | 46          | 12             | 27              |
| chr7, mir-196b                 | 0.001651 | 5          | 46          | 12             | 27              |
| chr7, mir-550-1                | 0.000302 | 4          | 46          | 13             | 27              |
| chr7, mir-590                  | 5.05E-06 | 3          | 46          | 15             | 27              |
| chr7, mir-653, mir-489         | 1.30E-06 | 3          | 46          | 16             | 27              |
| chr7, mir-591                  | 0.000788 | 4          | 46          | 12             | 27              |
| chr7, mir-25, mir-93, mir-106b | 0.000218 | 5          | 46          | 14             | 27              |
| chr7, mir-592                  | 6.18E-05 | 3          | 46          | 13             | 27              |
| chr7, SDN1, mir-593            | 1.49E-05 | 2          | 46          | 13             | 27              |
| chr7, mir-129-1                | 6.18E-05 | 3          | 46          | 13             | 27              |
| chr7, mir-182, mir-96, mir-183 | 0.00283  | 3          | 46          | 10             | 27              |
| chr7, mir-335                  | 1.49E-05 | 2          | 46          | 13             | 27              |
| chr7, mir-29a, mir-29b-1       | 0.000196 | 3          | 46          | 12             | 27              |
| chr7, mir-490                  | 0.000788 | 4          | 46          | 12             | 27              |
| chr7, has-mir-594              | 0.00283  | 3          | 46          | 10             | 27              |
| chr7, mir-671                  | 0.000113 | 1          | 46          | 10             | 27              |
| chr7, mir-153-2                | 0.00283  | 3          | 46          | 10             | 27              |
| chr7, mir-595                  | 0.004959 | 4          | 46          | 10             | 27              |
| chr8, mir-599                  | 0.045407 | 2          | 46          | 6              | 27              |
| chr8, mir-548a-3               | 0.045407 | 2          | 46          | 6              | 27              |
| chr8, mir-548d-1               | 0.011695 | 4          | 46          | 9              | 27              |
| chr11, PIWIL4                  | 0.023554 | 1          | 46          | 5              | 27              |
| chr12, mir-196a-2              | 0.010074 | 6          | 46          | 11             | 27              |
| chr12, mir-148b                | 0.006799 | 5          | 46          | 11             | 27              |
| chr13, mir-621                 | 3.66E-06 | 0          | 46          | 11             | 27              |

|                                   |          |   |    |    |    |
|-----------------------------------|----------|---|----|----|----|
| chr13, mir-16-1, mir-15a          | 5.12E-05 | 2 | 46 | 12 | 27 |
| chr13, mir-622                    | 0.001651 | 5 | 46 | 12 | 27 |
| chr13, mir-17, mir-18a, mir-19a,  | 0.008176 | 9 | 46 | 14 | 27 |
| chr13, mir-623                    | 0.00283  | 3 | 46 | 10 | 27 |
| chr14, mir-379, mir-411, mir-299, | 0.045407 | 2 | 46 | 6  | 27 |
| chr15, mir-626                    | 0.005375 | 0 | 46 | 5  | 27 |
| chr15, mir-627                    | 0.001739 | 0 | 46 | 6  | 27 |
| chr17, mir-423                    | 0.045407 | 2 | 46 | 6  | 27 |
| chr17, mir-454, mir-301           | 0.045407 | 2 | 46 | 6  | 27 |
| chr17, mir-21                     | 0.003204 | 1 | 46 | 7  | 27 |
| chr17, mir-548d-2                 | 0.005375 | 0 | 46 | 5  | 27 |
| chr17, mir-636                    | 0.023554 | 1 | 46 | 5  | 27 |
| chr20, mir-644                    | 0.011695 | 4 | 46 | 9  | 27 |

Loss:

| miRNA                 | p-value  | Tumor loss | Tumor total | Cell line loss | Cell line total |
|-----------------------|----------|------------|-------------|----------------|-----------------|
| chr2, mir-560         | 0.045407 | 2          | 46          | 6              | 27              |
| chr3, mir-567         | 0.010568 | 2          | 46          | 7              | 27              |
| chr3, mir-570         | 0.038979 | 13         | 46          | 2              | 27              |
| chr4, mir-573         | 0.045791 | 4          | 46          | 8              | 27              |
| chr5, mir-583         | 0.047029 | 0          | 46          | 3              | 27              |
| chr5, mir-103-1       | 0.005375 | 0          | 46          | 5              | 27              |
| chr5, mir-585         | 0.047029 | 0          | 46          | 3              | 27              |
| chr8, mir-596         | 0.002011 | 4          | 46          | 11             | 27              |
| chr8, mir-597         | 0.001476 | 2          | 46          | 9              | 27              |
| chr8, mir-124a-1      | 0.0011   | 1          | 46          | 8              | 27              |
| chr8, mir-598         | 0.0011   | 1          | 46          | 8              | 27              |
| chr8, mir-383         | 0.014695 | 3          | 46          | 8              | 27              |
| chr8, mir-320, PIWIL2 | 0.032316 | 3          | 46          | 7              | 27              |
| chr8, mir-486         | 0.016124 | 0          | 46          | 4              | 27              |
| chr10, mir-607        | 0.032316 | 3          | 46          | 7              | 27              |
| chr11, mir-610        | 0.008902 | 1          | 46          | 6              | 27              |
| chr11, mir-612        | 0.008902 | 1          | 46          | 6              | 27              |
| chr13, mir-623        | 0.045407 | 2          | 46          | 6              | 27              |
| chr15, mir-631        | 0.047029 | 0          | 46          | 3              | 27              |
| chr17, mir-142        | 0.016124 | 0          | 46          | 4              | 27              |

chr21, mir-155

0.000545

0

46

7

27
