# Supplementary material
Source: PubMed Central journal article supplement (PMC3401058)
Supplement: supp_blood-2009-01-202028_TableS7.pdf [file supp_blood-2009-01-202028_TableS7.pdf]

**98 gene list:**

hsa-let-7a  
hsa-let-7b  
hsa-let-7c  
hsa-let-7d  
hsa-let-7e  
hsa-let-7f  
hsa-let-7g  
hsa-let-7i  
hsa-miR-100  
hsa-miR-101  
hsa-miR-103  
hsa-miR-106a  
hsa-miR-106b  
hsa-miR-107  
hsa-miR-10b  
hsa-miR-125a  
hsa-miR-125b  
hsa-miR-126  
hsa-miR-126\*  
hsa-miR-130a  
hsa-miR-130b  
hsa-miR-140  
hsa-miR-142-3p  
hsa-miR-142-5p  
hsa-miR-143  
hsa-miR-145  
hsa-miR-146a  
hsa-miR-146b  
hsa-miR-148a  
hsa-miR-150  
hsa-miR-155  
hsa-miR-15a  
hsa-miR-15b  
hsa-miR-16  
hsa-miR-17-3p  
hsa-miR-17-5p  
hsa-miR-181a  
hsa-miR-181b  
hsa-miR-185  
hsa-miR-186  
hsa-miR-188  
hsa-miR-18a  
hsa-miR-191  
hsa-miR-193b  
hsa-miR-195  
hsa-miR-199a  
hsa-miR-199a\*  
hsa-miR-199b  
hsa-miR-19a  
hsa-miR-19b  
hsa-miR-20a  
hsa-miR-20b

**38 gene list: ANOVA (P<.01)**

hsa-let-7d  
hsa-let-7e  
hsa-let-7g  
hsa-miR-100  
hsa-miR-106a  
hsa-miR-125a  
hsa-miR-125b  
hsa-miR-130a  
hsa-miR-140  
hsa-miR-143  
hsa-miR-15a  
hsa-miR-16  
hsa-miR-17-3p  
hsa-miR-17-5p  
hsa-miR-188  
hsa-miR-18a  
hsa-miR-199a  
hsa-miR-199a\*  
hsa-miR-199b  
hsa-miR-19a  
hsa-miR-19b  
hsa-miR-20a  
hsa-miR-20b  
hsa-miR-23a  
hsa-miR-23b  
hsa-miR-24  
hsa-miR-27a  
hsa-miR-27b  
hsa-miR-29a  
hsa-miR-29b  
hsa-miR-29c  
hsa-miR-422b  
hsa-miR-575  
hsa-miR-630  
hsa-miR-638  
hsa-miR-663  
hsa-miR-768-3p  
hsa-miR-92

**16 gene list: ANOVA (p<.001)**

hsa-miR-100  
hsa-miR-106a  
hsa-miR-140  
hsa-miR-16  
hsa-miR-17-3p  
hsa-miR-17-5p  
hsa-miR-18a  
hsa-miR-199a\*  
hsa-miR-19a  
hsa-miR-19b  
hsa-miR-20a  
hsa-miR-20b  
hsa-miR-29a  
hsa-miR-29c  
hsa-miR-630  
hsa-miR-92

hsa-miR-21  
hsa-miR-210  
hsa-miR-214  
hsa-miR-22  
hsa-miR-222  
hsa-miR-223  
hsa-miR-23a  
hsa-miR-23b  
hsa-miR-24  
hsa-miR-25  
hsa-miR-26a  
hsa-miR-26b  
hsa-miR-27a  
hsa-miR-27b  
hsa-miR-29a  
hsa-miR-29b  
hsa-miR-29c  
hsa-miR-30a-5p  
hsa-miR-30b  
hsa-miR-30d  
hsa-miR-30e-5p  
hsa-miR-320  
hsa-miR-324-3p  
hsa-miR-331  
hsa-miR-342  
hsa-miR-34a  
hsa-miR-365  
hsa-miR-370  
hsa-miR-374  
hsa-miR-422b  
hsa-miR-424  
hsa-miR-425-5p  
hsa-miR-451  
hsa-miR-494  
hsa-miR-513  
hsa-miR-565  
hsa-miR-575  
hsa-miR-630  
hsa-miR-638  
hsa-miR-663  
hsa-miR-765  
hsa-miR-768-3p  
hsa-miR-768-5p  
hsa-miR-801  
hsa-miR-92  
hsa-miR-93
