# Supplementary material
Source: PubMed Central journal article supplement (PMC3401058)
Supplement: supp_blood-2009-01-202028_TableS8.pdf [file supp_blood-2009-01-202028_TableS8.pdf]

| Up-regulated by MYC | MG assignment |
|---------------------|---------------|
| miR-17-5p           | MG-A          |
| miR-19b-1           | MG-A          |
| miR-92-1            | MG-A          |
| miR-18a             | MG-A          |
| miR-19a             | MG-A          |
| miR-20a             | MG-A          |

| Down-regulated by MYC | MG assignment |
|-----------------------|---------------|
| let-7a-1              | MG-C          |
| let-7d                | MG-C          |
| let-7f-1              | MG-C          |
| let-7g                | MG-C          |
| miR-15a               | MG-C          |
| miR-16-1              | MG-C          |
| miR-22                | MG-B          |
| miR-26a-1             | MG-C          |
| miR-26a-2             | MG-C          |
| miR-26b               | MG-C          |
| miR-29a               | MG-C          |
| miR-29b-1             | MG-C          |
| miR-29b-2             | MG-C          |
| miR-29c               | MG-C          |
| miR-30b               | MG-C          |
| miR-30c-1             | Not present** |
| miR-30d               | MG-C          |
| miR-30e               | MG-C          |
| miR-34a               | MG-C          |
| has-miR-146a          | MG-C          |
| hsa-miR-195           | MG-B          |
| hsa-miR-497           | Not present** |

\*Nat Genet. 2008, 40:43-50

\*Nature. 2005, 435:839-43

Not included amongst 98 genes DLBCL cluster
