# Supplementary material
Source: PubMed Central journal article supplement (PMC3401058)
Supplement: supp_blood-2009-01-202028_TableS9.pdf [file supp_blood-2009-01-202028_TableS9.pdf]

**Normal B-cell miRNA profile****MG cluster 38-gene signature****MG cluster 98 gene-signature****High expression in memory, low in centroblasts/naïve cells**

|                 |             |             |
|-----------------|-------------|-------------|
| has-miR-99b     | Not present | Not present |
| has-miR-125a-5p | MG-B        | MG-C        |
| has-miR-671-5p  | Not present | Not present |
| has-miR-23a     | MG-B        | MG-B        |
| has-miR-23b     | MG-B        | MG-B        |
| has-miR-24      | MG-B        | MG-B        |
| has-miR-27a     | MG-B        | MG-B        |
| has-miR-27b     | MG-B        | MG-B        |
| has-miR-146a    | Not present | MG-C        |
| has-miR-146b-5p | Not present | MG-C        |
| has-miR-194     | Not present | Not present |

**High expression in centroblasts, low in naïve/memory cells**

|                |             |             |
|----------------|-------------|-------------|
| has-miR-151-5p | Not present | Not present |
| has-miR-181b   | Not present | MG-A        |
| has-miR-128b   | Not present | Not present |
| has-miR-128a   | Not present | Not present |
| has-miR-214    | Not present | MG-B        |
| has-miR-18a    | MG-A        | MG-A        |
| has-miR-130b   | Not present | MG-A        |
| has-miR-106b   | Not present | MG-A        |
| has-miR-28-5p  | Not present | Not present |
| has-miR-93     | Not present | MG-A        |
| has-miR-425    | Not present | MG-A        |
| has-miR-20a    | MG-A        | MG-A        |
| has-miR-17     | MG-A        | MG-A        |
| has-miR-106a   | MG-A        | MG-A        |
| has-miR-20b    | MG-A        | MG-A        |
| has-miR-25     | Not present | MG-A        |
| has-miR-15b    | Not present | MG-A        |
| has-miR-92a    | MG-A        | MG-A        |

|                                                  |             |             |
|--------------------------------------------------|-------------|-------------|
| hsa-miR-191                                      | Not present | MG-A        |
| hsa-miR-30c                                      | Not present | Not present |
| hsa-miR-16                                       | MG-C        | MG-C        |
| hsa-miR-125b                                     | MG-B        | MG-B        |
| High expression naïve/memory, low in centroblast |             |             |
| hsa-miR-223                                      | Not present | MG-C        |
| hsa-miR-29b                                      | MG-C        | MG-C        |
| hsa-miR-101                                      | Not present | MG-C        |
| hsa-miR-320                                      | Not present | MG-C        |
| hsa-miR-29c                                      | MG-C        | MG-C        |
| hsa-miR-150                                      | Not present | MG-C        |

\* Malumbres et al. Blood, 2008, Dec 1. [Epub ahead of print]
